# Supplementary material for: The assessment of biases in the acoustic discrimination of individuals
Source: PLoS One. 2017 May 9;12(5):e0177206. doi: 10.1371/journal.pone.0177206 (PMC5423633; doi:10.1371/journal.pone.0177206)
Supplement: S1 Dataset — (XLSX) [file pone.0177206.s001.xlsx]

## Sheet: R
id	population	year	duration	df	minf	maxf	q25	q50	q75	f1	f2	f3	f4	f5	f6	f7	f8	f9	f10	f11	f12	f13	f14	f15	f16	f17	f18	f19	f20	energyall	energynoise	energysignal	snrpow	snrdb
007a	HU	2013	0.6	1201.3	554.7	1796.9	882.8	1132.8	1476.6	609.7	698.7	674.1	755.7	778	788.9	808.5	827.3	836.8	850.4	859.7	1152.4	1061.5	1113.9	1138.4	950.4	1203.5	1114.9	1208.8	1192.5	4.7109e-06	1.25745e-07	4.58516e-06	36.464	15.6186
007a	HU	2013	0.64	1115.8	515.6	1828.1	898.4	1148.4	1406.3	553.6	515	0	1287.6	695.3	734.7	741	765.9	799	977.4	876.4	589.5	1109.2	1137.3	973.6	1149.9	1157.6	612.1	1226.5	599.2	6.73098e-06	5.1828e-07	6.2127e-06	11.9872	10.7872
007a	HU	2013	0.56	1170.8	710.9	1804.7	921.9	1203.1	1500	675.5	711.2	696.1	766.7	784.9	799.3	827.1	841.6	859.9	864.3	870.7	905.8	1165.8	1167.5	1164.9	1180.5	1215.8	1214.8	1248	1241.4	1.34197e-05	2.68216e-07	1.31515e-05	49.0333	16.9049
007a	HU	2013	0.552	1188.6	617.2	1765.6	968.8	1187.5	1421.9	627	656.7	700.3	680.5	860.5	763.8	762.1	798.7	861.5	912.4	515.2	1011.4	1002	1174.2	1189	1193.2	1189.9	1201.5	1224.9	1213.7	1.14571e-05	1.87642e-07	1.12694e-05	60.0582	17.7857
007a	HU	2013	0.48	1480.7	757.8	1703.1	1179.7	1351.6	1484.4	764.4	773.5	790.9	815.9	856.9	997.3	1094.3	1126.9	1103.7	1175.6	1217.7	1232.1	1219.1	1227.5	1238.8	1255.7	1298.4	651.4	636.8	1297.2	1.15822e-05	7.96355e-08	1.15025e-05	144.44	21.5969
007a	HU	2013	0.552	1210.5	718.8	1820.3	1031.3	1218.8	1507.8	703.6	734.7	772.1	799	819.6	817.5	868.2	899.5	973.9	976.7	1142.1	1166.2	1186.8	1209.5	1212.3	1240.3	1237.6	1256	1217.8	1268.1	1.15624e-05	1.82285e-07	1.13801e-05	62.4303	17.954
007a	HU	2013	0.56	1180.8	710.9	1843.8	984.4	1218.8	1539.1	696.8	717	760.1	781.4	789.5	816.4	833.4	864.7	893.8	1168.9	1157.4	1165.5	1178.5	1178.6	1171.2	1231.7	1229.1	1243.3	612.6	1230.1	1.47985e-05	4.10404e-07	1.43881e-05	35.0583	15.4479
007a	HU	2013	0.552	1214.8	601.6	1812.5	1023.4	1210.9	1453.1	624.9	682.8	673.7	732.6	754.1	790.6	766	808.7	1094.9	873.9	1004.9	1159.1	1154.1	1188	1186.5	1217.2	1245.8	1282.3	1183.1	1245.1	1.01709e-05	8.81832e-08	1.00827e-05	114.339	20.5819
007a	HU	2013	0.488	1208.9	765.6	1742.2	1140.6	1210.9	1476.6	746.1	764.9	733.8	816.5	802	869.7	578.7	1139	1144.9	1136.6	575.1	1173.4	1185.7	1192.7	1200.9	1200.6	1209.1	1226.9	1223.6	1224.7	1.92069e-05	1.91467e-07	1.90154e-05	99.314	19.9701
007a	HU	2013	0.648	1149.1	531.3	1851.6	960.9	1187.5	1531.3	538	576.9	633.5	686.1	719.7	729.8	755.1	787.7	801.3	821.4	839.4	1102.9	886.6	879.5	583.1	1196.1	1150.1	1153.4	1202.9	592.1	1.65156e-05	2.46564e-07	1.6269e-05	65.9828	18.1943
007a	HU	2013	0.672	1217.1	531.3	1804.7	968.8	1218.8	1492.2	522.8	588.9	684.7	727.2	726.4	781.7	802.6	833.5	839.6	882.7	1158.7	1151.3	1153.7	1198.2	1214.7	1153.6	1220.9	1246.4	1236.6	621.4	1.75494e-05	1.71278e-07	1.73781e-05	101.461	20.063
007a	HU	2013	0.6	1196.5	546.9	1859.4	960.9	1203.1	1414.1	561.7	0	683.7	716.6	755.8	792.6	804.4	810.2	856.8	832.3	1034.9	909.4	909.9	1157.6	1202	1195.9	1185.3	1214.5	1090.5	1265.3	1.70314e-05	1.35015e-07	1.68964e-05	125.144	20.9741
007a	HU	2013	0.592	1203.2	671.9	1875	929.7	1234.4	1468.8	682.6	718.5	757.4	755.4	781	833	859.2	875.1	881.6	896.2	915.6	925	1201.7	1197.7	1212.2	1219.1	1248	1253.2	1297.3	1302.8	1.71232e-05	1.6487e-07	1.69583e-05	102.858	20.1224
007a	HU	2013	0.608	1225	539.1	1757.8	1015.6	1234.4	1414.1	526.9	0	686.3	675.5	756.9	773.8	784.3	798.1	879.2	1210.9	1175.1	1113.7	584.3	1236.7	1245.2	1106.4	1232.9	1270.3	1237.8	1219.5	8.77574e-06	1.21792e-07	8.65395e-06	71.0554	18.516
007a	HU	2013	0.6	1263.7	687.5	1867.2	929.7	1234.4	1460.9	699.6	752.6	732.7	825.3	841.8	858.1	869.9	891.8	908.4	920.1	912.5	1162	1187.3	1207	1226.2	1233.8	1250.4	1259.2	1209.4	1273.6	1.09732e-05	3.57827e-07	1.06153e-05	29.6661	14.7226
007a	HU	2013	0.568	1232.6	695.3	1851.6	968.8	1218.8	1539.1	1375.4	722.1	727.9	784.4	777.3	820.1	846.5	857.1	858.4	876.9	897.2	1153.5	1122.3	1128.1	1137.8	956.9	1243	1127.8	1232.8	1230.6	2.43596e-05	1.40348e-07	2.42193e-05	172.566	22.3695
007a	HU	2013	0.536	1258.1	679.7	1820.3	1078.1	1257.8	1468.8	692	719.4	725.1	744.4	812	835	854.1	863.6	1161.5	880	1184.4	1192.7	1211	1224	1235.7	1255.6	1255.9	1265.3	1288.4	1246.7	1.65377e-05	1.6268e-07	1.63751e-05	100.658	20.0285
007a	HU	2013	0.576	1187.6	539.1	1890.6	953.1	1203.1	1539.1	715.2	772	795.4	824.2	851.1	865.5	879.3	884.8	905.3	926.1	922.5	925.8	927.8	929.5	1152.5	1177.2	1195.8	594.5	1187.8	593.1	2.68231e-05	1.60984e-07	2.66621e-05	165.62	22.1911
007a	HU	2013	0.592	1193.6	476.6	1890.6	906.3	1210.9	1539.1	532.8	1351.3	706.3	698.1	765.1	784.5	803.7	830.1	836.8	848.5	866.6	910	909.9	899	918.3	914.9	1189.9	1184.9	595.5	1218.3	1.99912e-05	1.39695e-06	1.85942e-05	13.3106	11.242
007a	HU	2013	0.568	1182.2	687.5	1867.2	968.8	1226.6	1546.9	672.1	712	696.7	783.8	768	812.7	853.4	872.7	881.2	899.7	920.6	1179.7	1168.8	1174.6	1172	1189	1213.4	1215.5	1238.8	1184.9	3.09826e-05	1.98629e-07	3.0784e-05	154.983	21.9028
007a	HU	2013	0.592	1179.8	695.3	1890.6	953.1	1226.6	1578.1	687.5	746.4	784.3	778.4	823.7	836.5	842.8	861.5	881.4	881.1	907.5	918.7	1177.5	1140.3	1159.9	1173.6	1192.4	1224.1	1154.1	1271.6	2.82172e-05	1.57782e-06	2.66394e-05	16.8837	12.2747
023a	HU	2013	0.624	1043.7	523.4	1796.9	835.9	1031.3	1351.6	1212.3	646.4	640.4	1337.5	659.2	722	746.2	752.1	770.9	788.7	811.2	833.6	841.8	845.8	862.3	1006.6	764.1	1061.2	671.8	551.8	2.52951e-06	1.68147e-07	2.36137e-06	14.0435	11.4747
023a	HU	2013	0.424	1073.3	750	1789.1	890.6	1078.1	1523.4	740.2	768.1	785.7	793.8	806.6	810	823.8	829.9	825.1	831.4	837.1	842.7	851	855.7	858.4	864.7	873.2	1067.3	1074.7	1083.3	7.80158e-06	1.36823e-07	7.66476e-06	56.0193	17.4834
023a	HU	2013	0.64	872.6	679.7	1812.5	882.8	1085.9	1523.4	536.1	682.1	692	719.9	750.5	781.7	796.1	809.2	821.3	825.6	837.5	848	851.3	854.6	859.3	866.1	883.4	1076.4	1374.8	0	1.2594e-05	1.2821e-07	1.24658e-05	97.23	19.878
023a	HU	2013	0.696	1071.6	554.7	1804.7	882.8	1093.8	1515.6	0	595.1	626.3	640.5	675.7	717.6	754	772.8	788.8	806.3	817.2	827.4	845	852.5	866	873.2	892.2	1074	530.2	649.7	5.67346e-06	2.90346e-07	5.38311e-06	18.5403	12.6812
023a	HU	2013	0.408	1084.2	765.6	1789.1	898.4	1085.9	1375	776.4	782.2	788.6	805.4	809.8	819.6	825.2	829.1	837.5	844.7	843.6	851.8	861.7	871.5	881.3	1064.2	1077.5	1096.2	1366.2	1358.7	1.30673e-05	2.93549e-07	1.27737e-05	43.5147	16.3864
023a	HU	2013	0.6	1066.9	734.4	1796.9	1000	1148.4	1585.9	652.4	669.9	708.8	741.8	760.5	778.3	792.9	806.8	821.6	832	844	855.2	866.7	871.7	876.8	880.4	1061.6	542.7	0	0	3.68636e-06	1.07849e-07	3.57851e-06	33.1809	15.2089
023a	HU	2013	0.64	880.4	671.9	1804.7	875	1062.5	1375	753.9	666.6	678.2	706.9	742.5	773.6	796.8	748.8	822.1	828.3	834.7	834	840	849.9	866	877.6	885.6	1086.2	960.4	555.3	6.26602e-06	1.20446e-07	6.14557e-06	51.0235	17.0777
023a	HU	2013	0.592	854.8	523.4	1828.1	859.4	1070.3	1476.6	618.1	611.6	632.4	1321.3	693.6	717.2	739.5	766.9	778.4	795.5	802.7	819.9	823.8	831.7	843.3	849.3	856.8	867.1	1054.1	1318	6.15917e-06	3.00925e-07	5.85824e-06	19.4675	12.8931
023a	HU	2013	0.64	1015.9	531.3	1781.3	843.8	1039.1	1515.6	1042.2	662.8	661.1	702.8	740.3	769	782.1	792.7	806.5	814.6	829.9	832.1	837.5	841.4	839	849.2	858.2	1016.4	541.5	793.2	6.03676e-06	2.77881e-07	5.75888e-06	20.7242	13.1648
023a	HU	2013	0.424	1039.6	703.1	1734.4	867.2	1054.7	1429.7	703.6	709.9	723	739.1	751.7	761.5	765.1	773.9	789.4	798.7	805.9	812.8	824	833.4	843.1	850.9	1027.8	1038.3	1053.8	1046.4	4.24453e-06	1.92353e-07	4.05218e-06	21.0664	13.2359
023a	HU	2013	0.536	886.4	671.9	1828.1	875	1109.4	1570.3	684.1	676.9	703.8	735	754.3	770.5	790.3	801.8	816.1	824.5	831.1	838.9	844.4	851.4	862.2	865.6	868.4	878.9	891.9	561.6	4.74435e-06	2.07253e-07	4.53709e-06	21.8916	13.4028
023a	HU	2013	0.56	895.8	687.5	1835.9	882.8	1046.9	1476.6	695	694.5	723.5	754.8	775.9	788.1	801.8	819.5	836.8	847.2	854.5	860.5	869.6	874	881.5	887.2	889.7	902.2	1070.3	1345.3	1.08551e-05	2.01978e-07	1.06531e-05	52.7438	17.2217
023a	HU	2013	0.592	876.9	609.4	1796.9	882.8	1148.4	1523.4	618.9	623.4	646.4	681.7	705.1	740.8	762.6	774	783.9	795.2	805.9	823.5	833.6	837.1	845.8	859.8	872.9	890.4	1089.2	1307.2	6.96706e-06	1.484e-07	6.81866e-06	45.9478	16.6227
023a	HU	2013	0.624	856.5	593.8	1765.6	867.2	1078.1	1492.2	533.6	615.2	621.2	645.9	648.2	734.8	755.7	721.2	781.6	794.3	804.9	820.8	823.5	826.7	831.3	848.4	857.4	1044	1082.3	1310.1	6.25294e-06	9.44319e-08	6.15851e-06	65.2164	18.1436
023a	HU	2013	0.64	1052.5	609.4	1773.4	882.8	1125	1539.1	543.2	624.1	617.3	615	706.2	737.7	756.7	775	791.4	800.7	809.6	820.5	828	838.8	847.5	854.4	860.7	1045.2	1064.3	1107.9	1.18692e-05	9.75586e-08	1.17716e-05	120.662	20.8157
023a	HU	2013	0.648	872	625	1796.9	882.8	1125	1523.4	561.4	629.7	626.4	655.9	696.4	725.1	737.5	753.9	767.1	786.5	796.1	809.5	819.7	835.2	849.1	859.4	871.6	541.6	1317.9	1193.3	6.61493e-06	9.5906e-08	6.51903e-06	67.9731	18.3234
023a	HU	2013	0.568	887.8	687.5	1828.1	882.8	1085.9	1515.6	674.1	668.4	704.3	743.1	755.3	783.4	804.5	816.8	823.7	828.5	848.1	854.1	853.2	860.7	872	883.6	889.4	898.9	1096	1358.5	2.32898e-05	2.6003e-07	2.30298e-05	88.5658	19.4727
023a	HU	2013	0.592	871.7	632.8	1773.4	859.4	1023.4	1507.8	656.9	645.4	687	724.6	751.9	773.9	791.3	804.6	819.2	826	830.7	829.3	842.8	847	852.1	862.1	863.1	877.1	1421.8	1313.4	6.77808e-06	2.27683e-07	6.5504e-06	28.7699	14.5894
023a	HU	2013	0.568	880.5	703.1	1820.3	882.8	1140.6	1531.3	1341.8	539.7	679.6	724.9	745.9	764.2	775.7	795.9	809.6	820.4	834.4	840	848.6	850.9	860.3	867.4	871.1	882.1	1299.5	1324.2	9.84432e-06	2.37375e-07	9.60695e-06	40.4716	16.0715
023a	HU	2013	0.456	887.8	734.4	1828.1	890.6	1078.1	1507.8	745.6	758.6	773.5	787.8	792.4	802.4	813.1	823.9	829.9	841.2	852.1	860.9	864.5	875.1	880.4	886.6	897.1	1095.2	1207	1233	2.2849e-05	1.88389e-07	2.26607e-05	120.286	20.8022
023a	HU	2013	0.528	885.7	671.9	1757.8	843.8	921.9	1195.3	675	685	719.8	749.7	759.6	779.1	793.1	810.5	823.2	832	837.6	845	852	858	864	872.1	877	888.1	906.1	1082	1.47772e-05	1.1691e-07	1.46603e-05	125.398	20.9829
023a	HU	2013	0.424	893.9	726.6	1835.9	906.3	1210.9	1640.6	732	748.6	766.3	788.5	801.4	808.6	816.4	827.3	844.1	856.6	860.4	867.8	871.1	875.8	875.8	881.3	890.4	897	916.1	1065.3	1.32118e-05	8.84461e-08	1.31233e-05	148.377	21.7137
023a	HU	2013	0.496	895.2	687.5	1820.3	835.9	921.9	1492.2	707.9	718.3	716.8	748.8	773.2	791.1	814.7	821.1	840.3	852.8	859.2	873.2	881.5	886.9	891.1	897	904.8	906.4	909.7	927.1	1.04071e-05	8.93695e-08	1.03177e-05	115.45	20.6239
023a	HU	2013	0.504	916.5	695.3	1742.2	875	937.5	1437.5	707.5	712.6	746.1	761.8	781.2	798.2	821.1	836.8	847.6	861.1	880.3	885.4	896.1	902.4	908.2	912.3	914.8	920.2	926.2	944.8	2.18535e-05	1.07634e-07	2.17459e-05	202.036	23.0543
023a	HU	2013	0.584	878.5	617.2	1804.7	867.2	1062.5	1492.2	621.2	632.8	657.6	704.9	721.7	745.4	754.3	772.1	790.6	805.8	828.8	835.5	844.5	848.8	855.7	866.6	878.9	882.7	920.1	1312.1	9.61961e-06	1.09651e-07	9.50996e-06	86.7294	19.3817
023a	HU	2013	0.48	917.8	750	1859.4	921.9	1101.6	1437.5	753.6	767.5	788.9	805.9	820.9	833.1	848.4	858.6	868.4	880.1	885	892.7	897.2	904.3	905.2	910	917.7	930.2	1111.1	1240.3	3.36319e-05	1.01135e-07	3.35308e-05	331.544	25.2054
023a	HU	2013	0.624	901.3	648.4	1781.3	875	1031.3	1406.3	995.6	665.3	667.1	691.2	729.1	760.9	787	805.9	824.1	838.4	848	858.6	872.1	881.4	891.5	893.1	899.3	921.6	542.3	1027.2	9.68909e-06	9.43369e-08	9.59475e-06	101.707	20.0735
023a	HU	2013	0.448	881.1	695.3	1703.1	851.6	914.1	1414.1	708	730.3	747	765.9	776.9	790.6	801.7	807.3	822.5	831.9	837	846	857.9	864.2	864.3	871.4	878.8	883.9	896.6	916.1	1.33413e-05	9.33115e-08	1.3248e-05	141.976	21.5221
023a	HU	2013	0.528	917.9	687.5	1867.2	898.4	1031.3	1429.7	698.8	719.3	741.5	763.4	781.7	803	817.2	841.4	846.7	857	866.2	880.3	885.8	892.4	897.3	905.8	914.7	924.1	947.2	1364.8	1.08853e-05	8.74647e-08	1.07978e-05	123.453	20.915
023a	HU	2013	0.56	899.2	679.7	1843.8	882.8	1109.4	1507.8	692	689.7	688	764.1	784.6	800.5	818.4	833.9	851.7	854.9	863.5	875.1	880.2	887.9	892.9	901.8	905.8	905.1	1141.5	1218.5	1.08419e-05	1.08933e-07	1.07329e-05	98.5281	19.9356
042a	HU	2014	0.816	938.3	585.9	1898.4	929.7	1171.9	1632.8	522.5	604.7	703.6	758.9	789.4	804.2	821.5	825.6	829.8	845.7	857.3	872.5	879.1	882.9	895.2	901.8	907.1	926.3	964.1	1048.8	0.000178764	5.26079e-08	0.000178712	3397.05	35.311
042a	HU	2014	0.72	950.5	765.6	1890.6	929.7	1031.3	1625	695.4	749.1	796	817.6	827.6	840.3	850.5	855.5	870.1	884.9	893.9	897.9	902.2	911	920.6	922.8	926.4	937.5	955.1	517.7	0.000306458	1.96059e-06	0.000304497	155.309	21.912
042a	HU	2014	0.832	949	609.4	1914.1	929.7	1156.3	1640.6	1015.7	604.5	711.1	782.8	808.9	833.1	841.6	850.4	866.1	881.3	886.9	892.9	904.1	909	912.6	917.6	927.3	637.3	1061.2	620.9	0.000266305	8.10681e-08	0.000266224	3283.95	35.164
042a	HU	2014	0.744	951.1	601.6	1906.3	929.7	1085.9	1640.6	575.4	664	733.8	775.3	818.3	832	847.9	864.1	871.4	881.6	891.3	902.3	908.4	911.4	918.6	928.2	928.7	928.9	942	993	0.000325572	2.93197e-07	0.000325279	1109.42	30.451
042a	HU	2014	0.76	956.6	601.6	1921.9	929.7	1039.1	1648.4	596.4	712.8	787.9	830.9	847	863.4	872.7	881.5	890.1	900.3	909.2	914.5	920	920.8	925.8	929.8	937.2	953.9	958	996.9	0.000324623	1.23749e-07	0.000324499	2622.24	34.1867
042a	HU	2014	0.752	943.8	601.6	1914.1	929.7	1093.8	1632.8	574.8	619.1	727.4	773.5	827	852.1	859.7	869	877.6	885	898.5	903.4	907.1	912.8	919.5	922.4	936.3	941.3	944.1	1009.1	0.000236948	1.47742e-07	0.0002368	1602.79	32.0488
042a	HU	2014	0.752	952.3	625	1906.3	937.5	1046.9	1625	606.6	698.8	769.7	806.7	831.8	846.8	856.2	866	872.6	875.3	882.5	900.6	903.3	910.8	913.6	921.1	933.4	944.2	956.7	514.4	0.000337924	1.13042e-06	0.000336794	297.938	24.7413
042a	HU	2014	0.744	951.2	625	1906.3	929.7	1023.4	1625	0	710.6	781	829	852.1	863.8	872.9	882.3	896	906	913	918.9	922.1	928.1	932.1	936	937.8	946.6	951.7	987.2	0.000483803	1.74525e-07	0.000483628	2771.11	34.4265
042a	HU	2014	0.76	950.6	617.2	1898.4	937.5	1054.7	1617.2	525.3	634.6	734.3	799.8	834.4	850.2	863.1	880.9	891.4	904.7	911.4	921.8	930.5	933.8	938.6	940.1	949	946.8	953	990.8	0.000501217	1.22151e-06	0.000499996	409.325	26.1207
042a	HU	2014	0.688	947.3	703.1	1898.4	937.5	1039.1	1679.7	709.4	774.1	834.2	856.8	872.1	882.8	889.2	895.6	903.6	909.1	914.9	924	928.6	933.7	936.6	934.8	949.1	947.6	949.5	990.1	0.000494417	4.73708e-07	0.000493944	1042.72	30.1817
042a	HU	2014	0.696	936.7	796.9	1898.4	921.9	1000	1593.8	696	764.8	823.5	845	859.6	874.2	888.3	894.8	897.9	908.7	913	919.5	919.5	923.8	926.1	938.3	927.3	924.8	940.3	979	0.000596966	2.95526e-06	0.000594011	201.001	23.032
042a	HU	2014	0.696	956	789.1	1890.6	937.5	1000	1578.1	708	772.2	819.2	839.3	850.9	857.2	871.6	882.5	886.8	894.9	902.6	919.3	926.8	936.7	941.8	945.6	954.7	955.6	960.4	987.6	0.000741747	3.01918e-07	0.000741445	2455.78	33.9019
042a	HU	2014	0.696	951	812.5	1875	929.7	992.2	1546.9	698.3	757.2	815.2	843.8	861.6	874.4	884.1	891.3	899.8	907.4	914.5	922.9	927.2	932	937.8	936.8	949.9	948.2	955.4	523.6	0.000671584	2.78647e-07	0.000671306	2409.16	33.8187
042a	HU	2014	0.704	957.4	820.3	1882.8	937.5	992.2	1546.9	733	816	854.4	868.6	886.4	893.6	896	903.7	903.7	909.4	926.2	938.1	944.4	951.5	956.4	955	948.4	947.6	963.7	525.7	0.000906987	9.00616e-07	0.000906086	1006.07	30.0263
042a	HU	2014	0.648	961.8	828.1	1867.2	945.3	984.4	1382.8	827.7	862.8	879.5	889	894.1	903.8	909.6	915.4	924	932.3	937.4	942.3	943.5	947.8	951.4	955.1	965.4	956.1	959.6	1000.3	0.000868061	2.21233e-06	0.000865849	391.374	25.9259
042a	HU	2014	0.656	955.8	828.1	1882.8	945.3	1015.6	1484.4	750.1	828.1	865.9	886.4	900.8	905.1	913.1	917.9	921.5	927.2	937.4	945.1	944.1	946.5	944.2	943.8	948.5	952.8	959.2	946.7	0.000771597	3.24192e-07	0.000771273	2379.06	33.7641
042a	HU	2014	0.656	959.1	835.9	1875	945.3	1000	1515.6	746.1	829.9	867.3	888.7	902.1	905.7	911.3	915.4	922.2	931.2	943.2	949	953.1	957.4	954.8	951.3	957.8	952.4	960.1	1002.3	0.000941849	5.9862e-07	0.00094125	1572.37	31.9655
042a	HU	2014	0.656	967.2	835.9	1867.2	945.3	984.4	1320.3	839.2	873.6	893.4	903.7	912.9	916.6	924.3	936.4	939.4	943.8	949.2	958	960.7	965.7	967.9	969.2	968.3	964.4	970.4	989.7	0.00125254	1.52522e-06	0.00125101	820.218	29.1393
042a	HU	2014	0.672	964.1	835.9	1867.2	945.3	1000	1562.5	769.3	835.4	865.3	887.3	898.7	901.9	912	919.9	932.9	939.7	939.5	947.4	956.2	960.1	958.9	958.2	958.9	966.4	968.6	995.4	0.00101547	8.57111e-07	0.00101461	1183.76	30.7326
042a	HU	2014	0.672	965.6	835.9	1875	953.1	1015.6	1562.5	758.1	836.1	865.8	883.6	894.3	903.4	909.9	918.1	929	931.9	939.9	945.4	950.8	953.2	957.3	962.5	967	960.2	969.6	1010.9	0.000980877	3.10118e-06	0.000977776	315.291	24.9871
042a	HU	2014	0.688	949.3	632.8	1890.6	929.7	1015.6	1601.6	647.8	657.1	794.4	831.7	839.2	864.5	874.7	879.3	890.7	899.1	908.6	917.1	933.4	934.5	935.8	940.9	931.7	932.2	951.8	949.1	0.000310356	4.65443e-06	0.000305701	65.6797	18.1743
042a	HU	2014	0.648	977.7	843.8	1898.4	953.1	1031.3	1531.3	726.2	819.1	866.1	889.2	909.6	919.4	926.4	934.7	943.1	947.2	955.6	959.6	962.5	966.4	971.9	972.5	973.2	973.7	979.3	1009.1	0.000740522	4.58718e-06	0.000735935	160.433	22.0529
042a	HU	2014	0.672	979.7	843.8	1890.6	953.1	1015.6	1515.6	757.9	859.7	885.5	906.7	922.9	929.6	931.5	935.4	949.3	955.2	960.7	966.4	968.1	975.2	980.6	979.9	969.8	971.4	985.6	526.3	0.00126055	7.30517e-06	0.00125325	171.556	22.3441
042a	HU	2014	0.672	969.3	781.3	1875	945.3	1015.6	1562.5	773.7	851.6	874.8	902	910.3	923.2	927.6	934.1	942	950.7	959.1	963.4	966	968.1	971.2	969.1	967.7	972.1	974.3	1034	0.00120368	9.38224e-06	0.0011943	127.293	21.0481
042a	HU	2014	0.632	969.4	843.8	1890.6	945.3	1007.8	1562.5	769.5	852.7	883	902.8	912.2	920.4	927.9	935.6	938.2	946.6	951.9	957.6	958.4	962.8	967.9	967.7	968.3	967.2	970.3	1002.8	0.00131281	1.12306e-05	0.00130158	115.895	20.6407
042a	HU	2014	0.672	973.2	843.8	1875	953.1	1015.6	1546.9	733.4	833.2	870.7	895.6	910.7	928.7	933.9	939.2	944.7	950.8	961.2	965.2	966.9	968.7	972.3	975	969.8	960.8	977.6	1004.2	0.0012611	4.2418e-06	0.00125685	296.302	24.7173
042a	HU	2014	0.68	965.4	851.6	1875	953.1	1015.6	1523.4	741.7	846.1	878.2	901.7	915.5	926.2	931.5	939.6	946.8	950.1	955.4	964.3	967.5	971.1	969.5	968.9	968	969.7	970.4	517.5	0.00119028	1.86172e-06	0.00118841	638.344	28.0505
042a	HU	2014	0.688	964.6	835.9	1890.6	945.3	1015.6	1562.5	743	820.4	888.3	904.3	919.5	929.6	932.4	939.8	946.3	948	951.6	958.2	965.8	964.8	960.3	960.1	966.9	965.2	969.1	967.3	0.00133137	5.78698e-07	0.00133079	2299.64	33.6166
042a	HU	2014	0.672	971	835.9	1882.8	945.3	1007.8	1554.7	746.1	843.8	880.8	902.1	917.3	925.3	929.2	934.6	939.7	951.6	958.5	963.1	967.9	969.7	967.8	964.4	957	960	974.1	519.3	0.00113838	4.982e-07	0.00113788	2283.99	33.5869
042a	HU	2014	0.648	970.3	843.8	1882.8	953.1	1000	1468.8	847.8	886.7	907.4	921	929.9	937.8	939.9	942.8	951.5	962.3	967.6	970.8	970.6	973.5	975.6	974.7	961.9	961.1	970.6	1012.9	0.001107	6.92611e-07	0.00110631	1597.31	32.0339
042a	HU	2014	0.656	970.8	843.8	1882.8	953.1	1007.8	1562.5	741.7	808.7	873	898.6	917.4	926.2	930.8	929.7	938.1	941.7	945.5	954.1	959	960.3	963.3	963.4	962.2	961	974.9	1002.4	0.00107993	1.5644e-07	0.00107977	6902.18	38.3899
045a	HU	2014	0.536	1118.1	914.1	1578.1	1023.4	1109.4	1164.1	932.1	954.4	1015.4	1073.5	1103.3	1113.9	1133.6	1129.8	1124.8	1124	1126.6	1133.1	1133	1130.2	1128.3	1122.2	1121.5	1120.2	1147.6	1122.8	0.000257796	1.67748e-07	0.000257628	1535.8	31.8633
045a	HU	2014	0.528	1087.4	914.1	1523.4	1023.4	1085.9	1140.6	927.3	959.6	982.1	1005.6	1028.8	1064.2	1085	1109.1	1105	1108.6	1101.1	1104.2	1111.4	1106.6	1105.9	1102.2	1096.7	1109	1483.5	1408.1	0.000607723	1.02256e-07	0.00060762	5942.13	37.7394
045a	HU	2014	0.536	1088.3	945.3	1476.6	1039.1	1093.8	1132.8	962.4	971.2	989.9	1024.2	1068.1	1084.6	1099.1	1106.8	1117.6	1116.4	1115.3	1113.9	1114.8	1115.2	1112.3	1106.6	1092.1	1088.3	1110	1112.6	0.000696667	3.67372e-08	0.00069663	18962.5	42.779
045a	HU	2014	0.56	1100.7	921.9	1484.4	1023.4	1085.9	1148.4	946.7	942.5	971.5	1013.6	1037.7	1072.9	1092.6	1100.3	1109.6	1116.5	1115.9	1124.4	1116.3	1116.9	1116	1108.9	1103.8	1145.5	1111.7	1091.4	0.00043661	3.94769e-08	0.00043657	11058.9	40.4371
045a	HU	2014	0.528	1093.7	906.3	1625	1031.3	1093.8	1164.1	920	942.3	972.2	1023.3	1062.5	1082.6	1082.3	1089	1101.3	1111.8	1120.1	1112.8	1114.5	1114.7	1106.4	1097.6	1097.1	1117.2	1093	1508.7	0.000445275	5.88943e-08	0.000445216	7559.58	38.785
045a	HU	2014	0.504	1096.7	921.9	1468.8	1031.3	1093.8	1148.4	938	961.9	986.8	1032.6	1082.5	1095.7	1102.5	1105.4	1111	1111.5	1117	1120.2	1119.3	1117.8	1117.8	1114.6	1106.6	1107.2	1137.4	1436.6	0.000642231	4.39056e-08	0.000642187	14626.5	41.6514
045a	HU	2014	0.536	1095.3	953.1	1218.8	1039.1	1085.9	1132.8	974.1	978.2	993.9	1029.2	1064	1089.6	1105.7	1101.3	1099.9	1103.4	1111.8	1113.2	1114	1110.9	1110.4	1107.2	1094.9	1095.7	1175.4	1111.5	0.00115759	2.17165e-07	0.00115737	5329.45	37.2668
045a	HU	2014	0.504	1084.3	953.1	1218.8	1031.3	1078.1	1125	968.1	972.4	983.6	1008.9	1046	1054.3	1067.7	1075.5	1080.8	1081.1	1082.3	1084.7	1089.2	1090.5	1088.3	1081.4	1076.5	1074.4	1076.4	1471.2	0.00119508	3.61863e-07	0.00119472	3301.57	35.1872
045a	HU	2014	0.544	1110.9	937.5	1250	1031.3	1093.8	1140.6	958.8	984.3	1022.6	1049.6	1098.6	1103.9	1112.4	1118.8	1118.5	1125.9	1126.7	1126.8	1128.3	1126.1	1117.7	1112.7	1103.9	1106.9	1101.1	1116.8	0.000636865	4.89878e-08	0.000636816	12999.5	41.1393
045a	HU	2014	0.536	1092.4	960.9	1210.9	1054.7	1093.8	1132.8	972.7	982.5	1018.4	1067.7	1096.6	1111.7	1112	1102.4	1102.6	1104.1	1110.4	1115	1110	1103.8	1102.2	1093.5	1080.2	1067.4	1116.5	1042.1	0.00135563	8.29843e-08	0.00135554	16334.9	42.1312
045a	HU	2014	0.52	1081.9	953.1	1210.9	1039.1	1085.9	1125	973.9	975.3	986.3	1014.1	1044.9	1079.5	1085.8	1086.6	1091.2	1094.8	1090	1098.4	1102.3	1100.1	1097.5	1086.8	1076.4	1068.7	1118.5	1089.5	0.00138699	5.90442e-08	0.00138693	23489.6	43.7088
045a	HU	2014	0.528	1106.8	953.1	1265.6	1046.9	1101.6	1156.3	966.8	976.5	989.1	1037.6	1061.3	1089.1	1102.3	1112.1	1120.5	1123.7	1120.3	1120.5	1118.2	1120.6	1119.3	1112.4	1108	1117.2	1201.2	1124	0.00100104	2.16167e-08	0.00100102	46307.6	46.6565
045a	HU	2014	0.552	1094	960.9	1265.6	1046.9	1093.8	1148.4	975.9	984	1012.8	1068.2	1084.9	1089.2	1092.2	1085.7	1083.3	1093.3	1092.3	1093.6	1094.5	1086.9	1082.6	1087.1	1089.8	1114.3	1084.3	1068	0.00136512	1.64523e-06	0.00136347	828.741	29.1842
045a	HU	2014	0.448	1034.2	921.9	1242.2	1007.8	1046.9	1148.4	938.4	947.9	968.4	985.9	996.5	1005	1009	1006.3	1009.7	1017.4	1021.4	1029.8	1035.4	1038.9	1025.1	1028.9	1036.1	1054.1	1190	1100.7	0.000625735	4.86041e-08	0.000625686	12873.1	41.0968
045a	HU	2014	0.52	1112.6	953.1	1234.4	1046.9	1093.8	1140.6	964.5	980.5	989.7	1032.9	1059.2	1080	1084.6	1088.6	1101.4	1108.6	1110.4	1118.4	1126.6	1126.6	1126.8	1120.1	1116.7	1117.7	1147.1	1183	0.00109209	1.12e-07	0.00109198	9749.81	39.89
045a	HU	2014	0.52	1116.7	953.1	1218.8	1031.3	1085.9	1132.8	987.7	980.3	989.7	1024.4	1057.2	1098.2	1105	1104.5	1113	1113.8	1119.1	1122.4	1120	1124.6	1124.1	1119.6	1115.7	1110.8	1153.6	1053.1	0.00087058	5.24269e-08	0.000870528	16604.6	42.2023
045a	HU	2014	0.536	1107.5	953.1	1179.7	1023.4	1093.8	1132.8	999.6	988.3	1021.6	1089.3	1126.1	1131.6	1136.8	1128.5	1128.1	1134	1135.4	1134	1128.6	1127	1124.4	1116.8	1105.2	1106.5	1122.9	523.8	0.00083249	1.12588e-07	0.000832378	7393.12	38.6883
045a	HU	2014	0.536	1094.6	953.1	1164.1	1023.4	1078.1	1125	976.1	980.1	1003.9	1051.8	1084.2	1109.1	1114.6	1112.5	1116.4	1120	1124.3	1122.9	1123.2	1119.8	1116.6	1110.5	1097.3	1085.8	1097.1	1099.7	0.000775526	6.02128e-08	0.000775465	12878.7	41.0987
045a	HU	2014	0.528	1101.3	968.8	1164.1	1039.1	1093.8	1125	994.5	988.6	1001.9	1075	1107.1	1125.3	1121.1	1117.4	1116.2	1120.3	1114.3	1110.7	1109.5	1103.4	1104	1094.3	1084.3	1076.2	1059.3	528	0.00127635	2.39213e-07	0.00127611	5334.6	37.271
045a	HU	2014	0.536	1103.9	960.9	1164.1	1023.4	1078.1	1117.2	993.8	983.6	1009.9	1053.2	1096.4	1108.7	1115.4	1112.1	1106.8	1109.7	1110.3	1117.5	1122.7	1116.8	1113	1111.2	1104.2	1099	1112.3	583.3	0.000820683	3.42152e-08	0.000820648	23984.9	43.7994
045a	HU	2014	0.536	1112.6	968.8	1195.3	1031.3	1085.9	1132.8	997.1	1000.7	1033.4	1073.8	1102.3	1110.7	1115.2	1117.9	1124	1122.5	1124	1124.4	1122.4	1121.2	1114.2	1107.1	1101.3	1094.7	1142	1096.8	0.000766302	1.19037e-06	0.000765111	642.752	28.0804
045a	HU	2014	0.536	1093.7	953.1	1210.9	1023.4	1078.1	1125	520.2	981.5	1010.1	1050	1085.5	1096.9	1107.2	1096.1	1098.8	1110.7	1113.1	1111.9	1107.8	1104.3	1103.5	1098.8	1092.6	1084	1097	1104.5	0.000758535	1.39089e-06	0.000757144	544.359	27.3589
045a	HU	2014	0.52	1073.5	968.8	1148.4	1023.4	1070.3	1109.4	991.7	996.7	1008.3	1071.1	1098.4	1104.4	1096.2	1097.2	1099	1101	1104.6	1107.9	1106.2	1101.1	1091.7	1087.9	1074.8	1057.1	1053	1029.7	0.000950432	4.31967e-07	0.00095	2199.24	33.4227
045a	HU	2014	0.512	1065	953.1	1140.6	1023.4	1062.5	1101.6	976.1	981.8	1001.4	1053.9	1083.1	1098	1093.8	1093.1	1091.2	1093.9	1097.1	1093.6	1091	1086.6	1076	1068.9	1059.9	1053	1039.2	1023.3	0.000844573	1.01444e-06	0.000843558	831.549	29.1989
045a	HU	2014	0.592	1100.6	968.8	1164.1	1031.3	1085.9	1125	520.5	996.1	1027.7	1102.9	1124.3	1119.6	1099	1103.3	1123.6	1122.1	1116.9	1110.7	1106.1	1105.7	1100.3	1079	1088.3	1097.1	1105.3	1110.3	0.000687163	4.48143e-08	0.000687118	15332.6	41.8561
045a	HU	2014	0.544	1088.3	960.9	1179.7	1023.4	1078.1	1117.2	992.4	986.8	1009.4	1040.9	1092.9	1104.1	1103.1	1104.9	1104	1105.4	1108.3	1104.1	1106.2	0	1099.6	1091.5	1079.9	1082.6	1129.5	1025.2	0.00066075	4.33791e-08	0.000660707	15231	41.8273
045a	HU	2014	0.528	1095.9	960.9	1218.8	1031.3	1085.9	1125	511	988.4	1001.1	1059.9	1092.9	1100.5	1098.1	1097.7	1094	1094.4	1099.1	1102.3	1107.4	1107.1	1102	1097	1093.9	1085.3	1179.2	1032.9	0.000671743	3.43637e-08	0.000671709	19547	42.9108
045a	HU	2014	0.528	1072.3	960.9	1148.4	1023.4	1070.3	1109.4	508	995	1007.6	1068.6	1096.5	1108.7	1101	1089.4	1088.7	1096.5	1099.9	1102.4	1099.3	1094	1089.7	1082.1	1070.7	1056.7	1050.1	515.9	0.000900606	2.86709e-07	0.000900319	3140.19	34.9696
045a	HU	2014	0.528	1064.5	960.9	1195.3	1031.3	1070.3	1117.2	510.5	986.8	997.9	1036.6	1069.8	1086.5	1084.7	1093.1	1100.9	1099.1	1095.9	1094.3	1095.4	1097.1	1092.7	1069.8	1060.8	1044.9	1117.8	1088.9	0.000876757	2.73881e-08	0.00087673	32011.4	45.053
045a	HU	2014	0.504	1092.4	937.5	1156.3	1023.4	1070.3	1109.4	983.8	990.1	997.1	1038	1063.8	1080.2	1095.1	1106.3	1106.1	1107.1	1112.4	0	1111.9	1112	1109.5	1101.6	1086.3	1076.5	1058.1	997.4	0.000516432	8.8105e-08	0.000516344	5860.55	37.6794
055a	HU	2014	0.736	1055.8	875	1867.2	1007.8	1078.1	1156.3	752	882.3	903.3	918.6	940.6	953.2	971.8	991.6	1016.7	1030.7	1052.9	1073.6	1089.7	1096.2	1100	1109.8	1116.4	878.2	880.1	881.1	0.000529234	2.88824e-06	0.000526346	182.238	22.6064
055a	HU	2014	0.72	1082.3	898.4	1851.6	1007.8	1062.5	1117.2	901	916.1	930.7	955.9	973.3	1015.1	1043.9	1044.1	1061.9	1075.3	1091.8	1094.4	1093.5	1093.9	1092.6	1096	1105.3	1104.9	1110.2	1154	0.000625665	1.46082e-06	0.000624204	427.295	26.3073
055a	HU	2014	0.72	1048.4	906.3	1562.5	1015.6	1078.1	1132.8	921.9	927.7	938.2	958.2	981.7	1015.7	1034.3	1054.3	1059.1	1074.2	1085.6	1088.3	1091.5	1099.3	1107	1113.6	1111.4	1112.3	1135.7	1326.1	0.000635961	2.61616e-06	0.000633345	242.09	23.8398
055a	HU	2014	0.704	1054.6	781.3	1546.9	1007.8	1062.5	1125	936.9	859.4	973.7	1005.5	1035.1	1054.5	1070.1	1077.9	1079.8	1086.9	1091.7	1093.7	1096.9	1105	1104	1104.5	1102.4	1104	566.8	1522	0.000665856	8.35859e-07	0.00066502	795.613	29.007
055a	HU	2014	0.664	1076.9	937.5	1195.3	1015.6	1070.3	1125	902.5	994.8	1032.3	1052.7	1071.8	1088.1	1091	1095.4	1099.8	1107.1	1113	1113.3	1114.9	1112.3	1114	1115.8	1114	1116.4	1118.3	1150.7	0.000744657	3.07751e-06	0.000741579	240.967	23.8196
055a	HU	2014	0.672	1072.2	929.7	1234.4	1031.3	1085.9	1140.6	930.5	944.4	962.9	981.9	1006.1	1054.6	1072.8	1080.6	1092.7	1102.4	1101.9	1104.6	1110.5	1115.8	1117.1	1124.9	1118.5	1119.9	1128.4	1125.2	0.00136155	2.21497e-06	0.00135933	613.701	27.8796
055a	HU	2014	0.696	1092.9	945.3	1234.4	1039.1	1093.8	1148.4	955	967.1	978.7	1001.8	1066.3	1068.9	1080.1	1089.2	1081.1	1087.8	1098.2	1109.9	1112.4	1111.9	1117.9	1119.5	1114.3	1120.3	1151.2	1569	0.00141203	3.56702e-06	0.00140846	394.858	25.9644
055a	HU	2014	0.656	1071.6	937.5	1218.8	1023.4	1078.1	1125	937.2	952.5	806	822.1	1010.3	1030.9	1043.7	1053.2	1062.4	1068.5	1077.6	1079.8	1085.9	1095.5	1098.8	1094.7	1094.7	1094.4	1110.2	1152.5	0.00152629	8.89114e-06	0.0015174	170.664	22.3214
055a	HU	2014	0.664	1071.3	929.7	1210.9	1023.4	1078.1	1125	938.5	945.2	956.5	1003	1032.2	1048.5	1050.1	1051.6	1066.6	1080.1	1083.7	1087	1089.1	1090.5	1095.5	1094.5	1091.8	1094.1	1105.3	579.7	0.00143582	7.08651e-06	0.00142873	201.613	23.0452
055a	HU	2014	0.624	1105.7	960.9	1234.4	1046.9	1109.4	1148.4	974.9	995.7	1052.4	1094.3	1106	1124.1	1118.5	1099.8	1111.7	1119.9	1122.3	1127.3	1128.9	1127	1130	1127.8	1131.4	1128.1	1132.1	1169.4	0.0010418	6.70558e-06	0.0010351	154.363	21.8854
055a	HU	2014	0.648	1085.5	945.3	1218.8	1023.4	1078.1	1132.8	959.2	985	728.5	1063	1086.8	1096.7	1101.8	1110.3	1113.7	1113.9	1115.9	1112.7	1114.1	1117.7	1118.7	1121.2	1118.2	1112.4	1116.4	1153.7	0.000820848	8.68855e-06	0.00081216	93.4747	19.7069
055a	HU	2014	0.696	1073.4	742.2	1562.5	1000	1078.1	1132.8	782.5	961.8	968.5	995.4	1052.6	1076.1	1087.7	1095.2	1105.2	1113	1121.1	1124.1	1125.8	740.7	1127.1	1125.6	1119.9	891.8	1141.6	920.1	0.000582684	8.28551e-06	0.000574399	69.3256	18.4089
055a	HU	2014	0.608	1112	960.9	1234.4	1054.7	1101.6	1140.6	508.9	989.3	1018.3	1056.4	1075	1086	1092.1	1102.5	1105.2	1110.4	1114.9	1118.8	1122.1	1124	1123.2	1117.9	1113.7	1115.8	1132.1	1184	0.00170731	1.89894e-06	0.00170541	898.088	29.5332
055a	HU	2014	0.64	1086.8	953.1	1546.9	1039.1	1093.8	1140.6	964.3	537.7	994.3	1032.1	1057.7	1080	1090.8	1099.4	1106.9	1115	1120.4	1122.3	1123.1	1126.7	1123.6	1119.5	958.5	1118	987.8	985.9	0.00146127	6.12365e-07	0.00146066	2385.27	33.7754
055a	HU	2014	0.624	1092.9	937.5	1187.5	1023.4	1078.1	1117.2	904.2	955.2	976.5	1021.9	1062.1	1085.6	1100.7	1108.2	1115.4	1109.7	1111.5	1106.9	1108.8	1111	1112.6	1106.6	1106.4	1103.6	1104.6	730.6	0.000809824	2.20612e-06	0.000807617	366.081	25.6358
055a	HU	2014	0.624	1074.8	554.7	1226.6	1031.3	1093.8	1140.6	501.6	986	1005.9	1062	1080.1	1088.9	1092	1100.2	1109.5	1112.4	1116.7	1123.3	1126.5	1130.1	1129.7	1121.9	1119.9	1123.4	1134.6	1123.9	0.000607479	2.14607e-06	0.000605333	282.066	24.5035
055a	HU	2014	0.632	1071	929.7	1203.1	1015.6	1078.1	1125	958.6	990.4	884.3	1063.1	1076.3	1092.6	1096.4	1103.3	1106.1	1110.6	1116.7	1114.6	1118.8	1117.2	1119.3	1116.9	1116.5	1115.2	1121.3	1155.6	0.000579722	1.99327e-06	0.000577729	289.839	24.6216
055a	HU	2014	0.632	1071.5	890.6	1289.1	1007.8	1078.1	1140.6	890.6	970.1	1003.1	1055.5	1072.4	1090.3	1025.7	1114.5	1117	1120.3	1127.5	1129.8	1131.3	1129.5	1128.9	1127.1	1120.8	1118.7	1133	1113.7	0.000302449	1.63289e-06	0.000300816	184.223	22.6534
055a	HU	2014	0.624	1065.1	703.1	1273.4	1000	1070.3	1132.8	938.6	988.4	1012	1062.2	1089	1103.3	1109	1115.2	1121.3	1125.9	1130	1134.2	705.8	1131.9	1129.3	1124.8	1118.3	1126.3	1144.7	1064.3	0.000340639	3.12171e-07	0.000340327	1090.19	30.375
055a	HU	2014	0.64	1069.4	640.6	1937.5	1046.9	1140.6	1656.3	929.8	1028.2	1044.1	1067	1085.6	1103.1	544.1	1109.7	1115.6	1121.8	1125.1	1129.6	1134.8	1136.3	0	1133.4	1129.9	1129.3	1007.3	1297.1	0.000458243	3.42906e-07	0.0004579	1335.35	31.256
055a	HU	2014	0.624	1065.6	914.1	1250	1007.8	1078.1	1132.8	886.8	986.5	999.1	1057.1	1077.4	1090.3	1102.7	1108.6	1120.2	1125.5	1134.3	1140	1142	1142.1	1141.8	1139.2	1133.6	1130.2	1138.2	1211.3	0.000358873	9.45235e-07	0.000357928	378.666	25.7826
055a	HU	2014	0.624	1062.5	898.4	1250	1023.4	1085.9	1140.6	943.7	1050.2	1055.6	1074.5	1104.8	1118.7	1124.9	1126.6	1126.1	1133.4	1141.8	1140.1	1139.8	1134.3	1132.7	1131.7	1130.8	1126.4	1146.4	1133.9	0.000211031	4.78242e-06	0.000206249	43.1264	16.3474
055a	HU	2014	0.648	1068.6	921.9	1195.3	1015.6	1062.5	1117.2	910	946.2	958.5	970.4	990.1	1013.8	1014.5	1028.3	1053.4	1063.8	1074.3	1084.2	1090.2	1087.7	1083.5	1083.2	1088.1	1087.8	1098.1	1139.7	0.00139513	3.41241e-06	0.00139172	407.841	26.1049
055a	HU	2014	0.624	1072.5	921.9	1562.5	1023.4	1085.9	1140.6	931.8	943.3	759.5	1034.5	1063.1	1081.2	1092.7	1104.9	1109.4	1111.2	1115.7	1122.2	1125.4	0	1129.4	1131.6	1130	1130.1	1151.9	1543.6	0.00037932	8.72598e-07	0.000378447	433.701	26.3719
055a	HU	2014	0.624	1116.5	906.3	1554.7	1031.3	1101.6	1164.1	923.4	957.6	980	1038.8	1000.9	1073.4	1082.5	1095.4	1110	1117	1120.3	1121.1	1121.5	1119.3	1122.1	1123.5	1126.2	1135.5	1166.2	981.3	0.000580379	7.61056e-07	0.000579618	761.597	28.8173
055a	HU	2014	0.64	1072.1	929.7	1429.7	1023.4	1078.1	1140.6	891.2	958.5	953.6	983.7	1023.1	1065.1	1084.7	1091.2	1102.5	1109.7	1117.9	1122.8	1117	1114.7	1114.2	1110.5	1107	1111.3	1134.4	1092.2	0.000861945	6.48815e-07	0.000861296	1327.49	31.2303
055a	HU	2014	0.608	1080.4	906.3	1273.4	1015.6	1085.9	1140.6	915.7	948.9	975.2	1056.9	1067.5	1080.1	1095.2	1107.5	1121.8	1132.6	1139	1138	1140.6	1138.3	1136.4	1126.2	1120.3	1117.7	1146.1	1247.7	0.000586519	9.24304e-07	0.000585595	633.552	28.0178
055a	HU	2014	0.608	1078.5	906.3	1265.6	1023.4	1078.1	1132.8	923	938.8	972.8	1028.4	1057.2	1078	1089.1	1099.7	1112.8	1120.6	1127.9	1133.2	1134.3	1132.6	1130.3	1128.5	1127.1	1127.9	1161	1089.3	0.000545953	7.17534e-07	0.000545236	759.874	28.8074
062a	HU	2014	0.728	1189.5	820.3	1875	1023.4	1210.9	1328.1	775.7	816.6	849.3	868.5	886.6	901.3	913.2	932.4	947.5	965	978	991	1183.7	1188.8	1189.7	1191.4	1213.5	1225.1	1019.7	1319.2	0.000757612	2.54959e-06	0.000755062	296.151	24.7151
062a	HU	2014	0.744	1204.5	843.8	1882.8	1031.3	1218.8	1335.9	805.1	832.2	863	884.6	903.2	929.4	940.3	951.1	966.3	983.5	999.7	1188.6	1198	1201.4	1209.9	1212.5	1248.3	1292.1	1292.6	1313.4	0.000856507	4.53826e-06	0.000851969	187.73	22.7353
062a	HU	2014	0.736	1213	851.6	1882.8	1093.8	1234.4	1328.1	826	854.1	872.7	892.1	912	931.1	945.1	966.1	982.9	991.2	1172.5	1191.2	1201.6	1204.5	1200.5	1210.5	1229.4	1253.3	1276	1352.9	0.00113867	3.20162e-06	0.00113547	354.655	25.4981
062a	HU	2014	0.704	1239.3	843.8	1882.8	1101.6	1242.2	1351.6	819.1	846	871.3	890.8	910.6	925.9	936.2	950.4	974.4	988	1171	1189.3	1200.8	1212.8	1218.6	1222.8	1223.6	1244.2	1265.6	1454.8	0.000991961	5.91506e-06	0.000986046	166.701	22.2194
062a	HU	2014	0.704	1197.1	726.6	1906.3	968.8	1187.5	1468.8	683.9	741.4	781.7	801	827.2	857.4	867.7	880.2	885.5	896.5	909.6	919.5	925.7	945.2	1133.6	1169.8	1181.9	1195.5	1213.5	1393.1	0.000342492	3.30366e-06	0.000339188	102.67	20.1145
062a	HU	2014	0.728	1255.4	796.9	1882.8	1046.9	1226.6	1304.7	796	823.6	837.6	857.6	883.7	899.5	913.1	931.4	945	553.9	549.6	586	1186.3	1195.5	1206.2	1213.4	1227.8	1257	1271.5	1306.2	0.000686217	1.64216e-06	0.000684575	416.874	26.2001
062a	HU	2014	0.696	1211.5	843.8	1882.8	1093.8	1234.4	1351.6	847.2	870.5	896.5	913.8	927.3	939.1	950.7	966.4	983.4	992.6	1002.9	1184.6	1190.6	1215.4	1236.1	1217.2	1213.5	1228.5	1313	1397.9	0.00082378	1.94006e-06	0.00082184	423.617	26.2697
062a	HU	2014	0.768	1212.1	812.5	1890.6	1085.9	1234.4	1382.8	807.9	844.4	868.9	888.2	915.1	935.1	951.9	970.6	985.3	988.7	999.6	1183.1	1192.9	1197	1192.6	1204.1	1226.6	1240.8	1386.2	1205	0.00100317	1.60985e-06	0.00100156	622.142	27.9389
062a	HU	2014	0.688	1211	859.4	1851.6	1085.9	1226.6	1328.1	859.1	875.6	903.6	920.9	946	960.6	969.4	980.1	994.7	999.4	1175.7	1184.6	1195.8	1199.4	1200.5	1201.9	1219.6	1227.2	1301	1389.4	0.000952818	1.33685e-06	0.000951481	711.731	28.5232
062a	HU	2014	0.688	1212.6	859.4	1875	1109.4	1234.4	1320.3	859.1	891.7	911.4	930.5	942.2	955	976.3	991	998.2	1014.7	1183.2	1187.5	1195.4	1202	1207.3	1221.4	1238.2	1266.1	1313.3	1216.1	0.00120949	1.58426e-06	0.00120791	762.446	28.8221
062a	HU	2014	0.672	1212.6	882.8	1867.2	1109.4	1234.4	1328.1	867.1	898	923.6	940.9	956.8	975.2	984.4	997.5	1012.7	1177	1178.2	1182.2	1190.1	1197	1205.8	1221.5	1235.2	1266.8	1329.4	1359.1	0.00157862	2.21938e-06	0.0015764	710.287	28.5143
062a	HU	2014	0.648	1211.2	882.8	1867.2	1070.3	1210.9	1289.1	882.4	910.9	931.3	943.3	967.9	978.2	990	999.3	1015.8	1164.7	1175.1	1180.3	1194.1	1203.8	1216.6	1226.8	1250.8	1271.9	1272.7	1307.3	0.00145559	1.76875e-06	0.00145382	821.947	29.1484
062a	HU	2014	0.688	1231.4	835.9	1882.8	1078.1	1226.6	1304.7	834.5	859.6	888.8	907.1	923	935	949.2	971.1	987.2	997	1183.8	1183	1182.5	1202.6	1215.8	1254.2	1262.4	1230	1239.8	646.1	0.000868098	2.05142e-06	0.000866046	422.17	26.2549
062a	HU	2014	0.664	1211.6	867.2	1851.6	1078.1	1218.8	1289.1	864.1	891.2	912.6	941.3	961	975.3	986.9	999.5	1012.1	1178.4	1184.1	1193.8	1197	1205	1222.7	1234.3	1265.6	1259.6	1272.3	1309.7	0.00161554	1.38343e-06	0.00161415	1166.77	30.6699
062a	HU	2014	0.672	1193.2	851.6	1843.8	1054.7	1210.9	1304.7	857.9	890.1	910.5	937.5	957.9	966.4	979.8	994.4	1008.4	1020.5	1174.9	1180.9	1190.4	1186.8	1189.1	1192	1206.3	1218.3	1238.5	704.5	0.00114916	1.17072e-06	0.00114798	980.581	29.9148
062a	HU	2014	0.696	1221.5	820.3	1429.7	1039.1	1203.1	1296.9	820.8	847.6	873.1	898.7	929.6	947.1	956.3	970	981.9	1000.6	1013.1	1160.8	1174.3	1187.5	1199.5	1207.5	1213.1	1226.2	1238.1	1227.4	0.000805464	2.51922e-06	0.000802944	318.728	25.0342
062a	HU	2014	0.68	1212.1	835.9	1820.3	1039.1	1203.1	1281.3	845.7	870.4	892.3	919.9	942.8	966.9	979.7	994.8	999.9	1012.6	1044.3	1183.9	1190.4	1198.5	1206.8	1224.6	1241.4	1232.4	1239.1	1266.9	0.000725169	1.3238e-06	0.000723845	546.794	27.3782
062a	HU	2014	0.64	1233.2	867.2	1851.6	1070.3	1210.9	1281.3	872.9	887.9	908.7	930.8	952.9	971.5	987.9	1000.2	1009.4	1025.2	1174	1175	1186.3	1193.4	1194.9	1207.8	1221.8	1236.9	1258.1	1345.2	0.000950144	1.19354e-06	0.00094895	795.073	29.0041
062a	HU	2014	0.632	1190.5	898.4	1867.2	1093.8	1210.9	1304.7	892.5	918.4	937.9	954.9	969.7	989.5	1001.1	1012.4	1024.2	1160.8	1168.8	1175.6	1195.2	1210.2	1193.1	1199.3	1206.2	1263.9	1262.4	1340	0.00124536	1.45015e-06	0.00124391	857.778	29.3338
062a	HU	2014	0.688	1211.3	890.6	1867.2	1093.8	1210.9	1312.5	892.2	912.8	933	954.7	977	988.5	1002.3	1015.3	1083.7	1166.5	1181.6	1191.3	1195.2	1208.5	1223.8	1234.3	1239	1324.4	1395.8	597.2	0.00096081	1.26852e-06	0.000959542	756.425	28.7877
062a	HU	2014	0.632	1212.2	890.6	1812.5	1109.4	1226.6	1320.3	892.8	918.6	944.7	957	973.4	983.7	995.9	1007	1015.9	1153	1162.9	1172	1177.4	1189.7	1201.4	1215.7	1231.2	1243.6	1309.8	1314.2	0.00124252	1.56356e-06	0.00124096	793.673	28.9964
062a	HU	2014	0.624	1215	898.4	1843.8	1054.7	1187.5	1257.8	905.1	928.1	956.9	973.2	992.7	1007.5	1019.6	1029.5	1034.3	1042.3	1159.1	1167.7	1178.6	1187.7	1202.5	1208.8	1217.4	0	1222.7	1284.1	0.00132882	1.62943e-06	0.00132719	814.511	29.109
062a	HU	2014	0.624	1217.6	906.3	1859.4	1101.6	1210.9	1296.9	908.8	931.2	955.4	968.8	987	1001.9	1012.7	1021.5	1026.3	1150.2	1165.3	1181.9	1184	1197.9	1215.2	1229.9	1237.5	1241	1272.8	1391.5	0.00118642	1.94572e-06	0.00118447	608.759	27.8445
062a	HU	2014	0.616	1197.3	882.8	1859.4	1062.5	1195.3	1289.1	892.7	915.5	933.3	956.4	978.2	986.7	999.8	1011.4	1026.7	1033.1	1141.7	1164.6	1178.6	1191.4	1203.9	1183.1	1195.7	1203.4	1271.7	1322.1	0.00118744	2.4457e-05	0.00116298	47.552	16.7717
062a	HU	2014	0.68	1211	906.3	1843.8	1085.9	1203.1	1265.6	907.2	930.8	949.9	982.8	999	1011.8	1024.7	1035	1143.3	1160.4	1169.6	1186.1	1195.8	1210.2	1227.2	1255.5	1249.4	1255.7	1287.1	952.4	0.00144758	2.94097e-06	0.00144464	491.21	26.9127
062a	HU	2014	0.648	1141.7	898.4	1460.9	1070.3	1164.1	1265.6	903.9	933.2	952.8	970.4	993.9	1005	1012.3	1023.2	1037.3	1043.3	1049	1067.5	1131	1148.4	1165.1	1188.4	1256	1252.1	1202.3	1067	0.00144956	3.26759e-06	0.00144629	442.618	26.4603
062a	HU	2014	0.632	1193.9	890.6	1851.6	1062.5	1187.5	1289.1	870.6	904.9	921.8	942.2	966.4	986.7	994.9	1009.3	1019	1040.2	1140.5	1145.4	1154.7	1165.8	1183	1196.6	1218.7	1271.8	1296.7	1333.7	0.00101757	4.79094e-06	0.00101278	211.394	23.2509
070a	HU	2013	0.712	849.8	687.5	1742.2	804.7	867.2	1437.5	1258.2	721.2	631.9	734.3	745.5	751	758	775.1	778.1	784.3	785.9	799.1	806.3	809.8	831.1	855.1	856	858.1	813	784.9	3.82138e-05	1.17956e-07	3.80959e-05	322.967	25.0916
070a	HU	2013	0.744	859.1	664.1	1773.4	828.1	1203.1	1554.7	551.1	680.8	703.6	713.8	726	749	751.8	759.2	774.1	789.4	792.7	805.1	807.3	814.8	824.2	844.2	860.4	866.7	829.3	811.2	5.67329e-05	6.10862e-07	5.6122e-05	91.8735	19.6319
070a	HU	2013	0.784	854.2	679.7	1765.6	812.5	890.6	1546.9	1126.7	740	740.9	743.4	753.6	767	776.9	779	778.2	791.4	793.9	805.3	818.2	829.2	855.2	864	860.4	825.7	772	814.2	4.42381e-05	9.59407e-08	4.41422e-05	460.099	26.6285
070a	HU	2013	0.72	859.2	578.1	1765.6	828.1	1039.1	1546.9	1067.4	743.2	756.4	763.2	778.5	780.2	792.6	802.2	802.5	809.8	809.4	811.7	818.2	833.8	851.5	859.6	864.1	866.5	851.3	775.7	3.07728e-05	3.15275e-06	2.762e-05	8.76059	9.42533
070a	HU	2013	0.736	857.4	585.9	1757.8	820.3	898.4	1539.1	660.2	761.1	759.8	761.4	779.8	795.8	789.8	793.7	800.7	803.7	808.4	813.3	835.5	822.2	837.7	843.7	854.7	863.7	831.4	829.5	1.99983e-05	5.87308e-08	1.99396e-05	339.508	25.3085
070a	HU	2013	0.8	854.5	593.8	1765.6	835.9	1218.8	1585.9	571	757.4	749	745.7	763	768.2	770.7	788.6	799.1	803.2	801.7	805.1	832.6	844.2	849	861	863	816.9	866.1	839.6	4.0093e-05	4.65636e-08	4.00465e-05	860.039	29.3452
070a	HU	2013	0.784	853.1	554.7	1757.8	843.8	1203.1	1570.3	547.5	735.4	738	730.4	751	767.6	767.7	786.2	797.7	799.7	807.5	811.5	830	838.4	859.3	857.2	795	845.8	822.1	849.6	3.94001e-05	4.6856e-08	3.93532e-05	839.876	29.2422
070a	HU	2013	0.712	884.2	757.8	1812.5	867.2	1070.3	1632.8	768.9	809.4	813.5	809.3	815.2	822.5	1649.3	822.8	825.4	825.5	829.8	838.1	855	862.6	871.6	880	881.1	892.2	877.6	815.4	6.93025e-05	1.17085e-07	6.91854e-05	590.898	27.7151
070a	HU	2013	0.824	869.9	742.2	1789.1	859.4	1101.6	1625	1281.7	810.7	803.8	813.6	822.9	823.4	821.1	826.7	834.6	838.5	834.3	846.7	851.3	860.1	868.4	879.7	870.4	1121.7	872.8	1108.4	6.19621e-05	5.6755e-08	6.19054e-05	1090.75	30.3772
070a	HU	2013	0.744	873.8	726.6	1804.7	851.6	1078.1	1601.6	1069	786.1	793.6	777.6	801.1	805.9	814.9	815.8	827.3	844	852.4	851	848.9	861.8	869.5	873.8	877.8	880.2	873.4	777.3	5.11282e-05	2.36456e-06	4.87637e-05	20.6228	13.1435
070a	HU	2013	0.824	880	726.6	1804.7	843.8	1062.5	1585.9	548.8	757.8	766.7	759.8	767	785.6	798.6	808.6	828.4	831.5	841	849.3	856.6	867.8	875.7	885.2	867.1	878.1	844.3	877.7	3.79539e-05	6.76445e-08	3.78863e-05	560.079	27.4825
070a	HU	2013	0.736	864.1	726.6	1773.4	835.9	1117.2	1601.6	1274.8	793.4	783.5	779.2	791	806.4	808.7	808.4	806.7	818.3	819	809.8	821.8	831.8	835.2	849.4	861.2	863.1	865.8	802.2	4.44647e-05	9.8109e-08	4.43666e-05	452.218	26.5535
070a	HU	2013	0.656	881.5	507.8	1804.7	804.7	906.3	1531.3	752.7	782.8	768.8	774.9	795.8	800.6	810.8	544.2	817.1	838.5	839.3	831.2	847.1	858.8	869.1	872.5	879.9	888.9	873.1	778.4	4.87405e-05	1.34064e-07	4.86064e-05	362.561	25.5938
070a	HU	2013	0.736	868.4	710.9	1781.3	835.9	1000	1570.3	617.9	762.8	764.9	775.1	786.2	796.2	814.8	821.2	842.5	849.2	849.3	853.7	851.8	848.8	858	863.4	875.4	874.8	873	820	4.64231e-05	9.96992e-08	4.63234e-05	464.632	26.6711
070a	HU	2013	0.72	870.5	734.4	1789.1	851.6	1007.8	1570.3	765.1	798	779.5	797.6	805.5	818.1	815.5	821.4	823.5	829.3	840.3	837.6	847.3	849.1	857.1	866.9	872.7	878	859.8	804.4	5.11589e-05	1.97018e-07	5.09619e-05	258.667	24.1274
070a	HU	2013	0.688	866.8	593.8	1781.3	843.8	992.2	1539.1	645.2	780.6	776.3	770.1	780.4	791.5	793.4	794.8	791.5	794.8	804.1	817.5	819.7	833.2	842.4	862	866.9	871	867.9	774.6	3.3433e-05	3.96719e-07	3.30362e-05	83.2737	19.2051
070a	HU	2013	0.688	891.4	765.6	1828.1	875	1109.4	1656.3	792.8	818.9	802.9	804.3	811.2	814.3	827.4	835.9	828.3	831.6	842.4	845.3	853.2	858.9	863.4	875.9	886.1	894.5	879.4	823	6.00684e-05	6.7052e-08	6.00014e-05	894.849	29.5175
070a	HU	2013	0.712	905.9	781.3	1859.4	882.8	937.5	1664.1	808.6	837.8	835	826.7	831.6	840.9	851.8	854.6	855.3	862.5	872.9	874.6	880.3	882.4	893.4	907.3	910.1	912.7	901.5	898.5	9.86625e-05	5.42672e-08	9.86083e-05	1817.09	32.5938
070a	HU	2013	0.704	899.1	765.6	1843.8	882.8	1007.8	1640.6	781	819.3	817.1	822.5	838.2	847.4	859.2	863.8	860.9	864.3	863.9	876.8	883.7	886.9	893	890.6	904.3	906.9	897.5	806.3	0.000106755	1.68162e-07	0.000106587	633.836	28.0198
070a	HU	2013	0.816	876.9	710.9	1804.7	843.8	1148.4	1632.8	571.8	745.7	765.4	761	781.6	781	787.5	803.3	818.9	820.9	823.4	838.1	854.6	866.7	874.1	885.7	872.8	881.2	831.2	872.4	3.89536e-05	1.03223e-07	3.88504e-05	376.373	25.7562
070a	HU	2013	0.688	914.4	781.3	1875	890.6	937.5	1671.9	823.8	857.9	859.6	862.9	869.5	883.1	882.7	877.9	878.2	882.7	886.8	889.7	898.6	900.9	903.9	914.8	917.2	921.4	911.9	822.8	0.000139122	4.91256e-08	0.000139073	2830.97	34.5194
070a	HU	2013	0.696	900.2	781.3	1859.4	882.8	929.7	1648.4	838.9	873.5	865	860.5	870.4	874.5	876.4	878.7	879.1	881.7	883.6	895.7	890.9	899.1	903.4	913.1	917	915.2	883.3	910.4	0.000119433	6.63491e-08	0.000119367	1799.07	32.5505
070p	HU	2014	0.864	1007.5	539.1	1851.6	906.3	1039.1	1523.4	1002.1	1194.6	815.5	840.7	843.3	844.4	848.1	849.7	846.2	852.7	852.1	853.2	854.1	854.7	857	858.5	866.9	877.7	897.2	895.5	1.58292e-05	3.32267e-07	1.5497e-05	46.6401	16.6876
070p	HU	2014	0.976	1016.1	500	1843.8	929.7	1046.9	1148.4	539.3	560.1	534.1	881	893.9	891.9	890.1	882.7	886.5	880.7	882.7	884	893.3	892.2	894.6	927.6	547	568.8	526.7	548.9	1.31365e-05	5.05858e-07	1.26306e-05	24.9687	13.974	-10
070p	HU	2014	0.744	903.7	523.4	1867.2	906.3	1039.1	1132.8	559.8	869.6	893.9	905.2	914.6	915.3	912.9	908.7	910.2	907.4	905.6	902.3	896	896.8	896.2	897.6	902.3	916.9	910.5	1097.4	2.38761e-05	1.03791e-05	1.3497e-05	1.3004	1.14075	-20
070p	HU	2014	0.68	919.1	500	1851.6	906.3	1000	1132.8	589.4	879.4	892.7	908	918.4	919.6	918.9	910.4	908.8	909.9	910.8	907.2	911	912.9	910.6	910.7	914.7	542.2	595	1106	6.98325e-05	1.28689e-06	6.85456e-05	53.2645	17.2644	-10	velka ozvena
070p	HU	2014	0.8	900.1	492.2	1875	820.3	906.3	1203.1	514.7	533.1	550.5	859.7	887	895.2	899.2	901.6	901.7	901.9	903.8	903.3	902.5	902.6	901.8	902	905	905.2	907.8	930.2	3.33109e-05	8.80742e-07	3.24302e-05	36.8214	15.661
070p	HU	2014	0.76	1779.9	562.5	1890.6	984.4	1171.9	1742.2	549.9	855	883	893.9	902.9	907.2	899.5	896.9	900.3	899.3	895.3	898.4	898.5	896.2	895.9	900.6	903.6	907.4	921.7	550.9	8.96627e-05	1.95382e-07	8.94674e-05	457.911	26.6078
070p	HU	2014	0.736	1022.7	804.7	1890.6	976.6	1085.9	1640.6	1093.2	866.1	892.4	904.3	910.6	908.3	904.6	904.1	897.1	897.1	895.7	897.9	900.6	902	900.6	905.1	908.4	910.8	924.1	1048.9	0.000127165	2.37669e-07	0.000126927	534.051	27.2758
070p	HU	2014	0.704	1031.2	820.3	1859.4	1007.8	1070.3	1242.2	833.7	860.2	877.2	884.7	891.7	894.3	891.9	890.1	888.5	891.4	894.8	894.9	895.9	900	904.2	908.8	910.7	922.7	1007.5	1067.4	0.000208473	9.88452e-08	0.000208374	2108.09	33.2389
070p	HU	2014	0.672	1008	875	1875	992.2	1046.9	1320.3	851.1	898	910.1	918.5	925.8	923.6	921.5	918.7	918.4	916.5	913.9	913.6	918.6	918.7	918.8	914	914.3	926.7	996.1	1052.1	0.000145856	1.01433e-07	0.000145754	1436.95	31.5744
070p	HU	2014	0.72	991.4	601.6	1906.3	976.6	1078.1	1687.5	548.6	873.4	899	914.1	923.2	929.8	921.1	915.6	914.2	913.1	912.9	910	911.1	914.3	910.4	907.1	909.8	916.8	938.9	1054.4	0.000158372	9.09227e-08	0.000158281	1740.83	32.4076
070p	HU	2014	0.72	986.5	812.5	1906.3	984.4	1101.6	1726.6	575.9	871	898.8	909.6	912.9	920.3	919.8	916.5	916.7	917.5	919.2	918.8	917.9	918.6	921.8	923.2	923	927.3	927	1032.9	0.000170799	5.3107e-07	0.000170268	320.613	25.0598
070p	HU	2014	0.728	1024.5	562.5	1906.3	976.6	1109.4	1726.6	571.1	855	892.7	906.6	915.9	915.3	911.2	907.9	906.2	904.5	904.1	904.8	905.4	907.6	909.3	910.3	913.3	916.8	929.6	1085.8	0.000131662	1.10301e-07	0.000131552	1192.66	30.7652
070p	HU	2014	0.728	1024.6	554.7	1914.1	1000	1171.9	1726.6	532.6	850.1	903.1	921	933.5	932.7	927.5	927	923.6	917.1	918.9	918.1	914.1	915.1	911.7	914.1	916.1	923.4	936.7	929.8	0.000116271	1.10961e-07	0.00011616	1046.86	30.1989
070p	HU	2014	0.736	971.9	578.1	1890.6	968.8	1070.3	1703.1	566.3	847.8	877.5	892	896.8	896.7	895.8	895	890.4	891.3	893.1	890.8	893.1	897.4	900.1	902.8	905.1	912.5	931.3	1027.4	0.000115658	3.09997e-07	0.000115348	372.094	25.7065
070p	HU	2014	0.688	978.2	820.3	1890.6	953.1	1046.9	1453.1	555.1	885	908.3	920.6	931.3	927.9	924.6	923.2	918.7	917.3	916.5	918.1	919.2	918.4	916	916.8	920.9	925	969.4	1096.9	0.000206747	1.18719e-07	0.000206628	1740.47	32.4067
070p	HU	2014	0.688	967.5	773.4	1906.3	953.1	1054.7	1593.8	558.9	881.6	907	919.6	925.9	926.6	921.2	922.3	920.9	919.6	917.1	921.1	918.4	919	922.5	926.9	929.5	934.2	955.6	1099	0.00019225	2.09374e-07	0.000192041	917.213	29.6247
070p	HU	2014	0.736	925	570.3	1890.6	945.3	1242.2	1734.4	561.5	861.4	898.9	912	918	916.6	913.8	916.3	911.8	910.7	908.4	909.8	910.2	910.5	912.8	911.4	912.2	920.2	929.9	519	0.000156748	3.94459e-07	0.000156353	396.374	25.9811
070p	HU	2014	0.68	932.9	757.8	1898.4	953.1	1062.5	1609.4	554.7	881.5	909.8	925.1	931.6	931.4	930.5	930.6	930.5	924.5	919.9	921.9	919	913.4	917.1	923.3	920.3	919.8	928.4	533.9	0.000147976	1.26399e-06	0.000146712	116.071	20.6472
070p	HU	2014	0.664	948.6	804.7	1929.7	968.8	1101.6	1695.3	564.2	889.6	915.8	932.4	944.1	948.6	946.1	942.4	940.9	939.3	936	925.8	926.3	926.5	923	918.4	914.9	922.7	962.9	531.2	0.000157131	1.13417e-07	0.000157018	1384.43	31.4127
070p	HU	2014	0.648	940.6	789.1	1914.1	953.1	1109.4	1726.6	555.3	878.4	909.7	925.3	939.9	942.5	939.5	938.2	935.9	929.3	922.9	918.9	921.6	921.6	920.9	915.1	918.4	924	934.9	1040.8	0.000148978	1.21682e-07	0.000148856	1223.32	30.8754
070p	HU	2014	0.76	1003.1	710.9	1867.2	1000	1117.2	1695.3	978	848.6	878.5	878.8	876.8	872.5	871.9	867.8	867.2	866.6	870.2	877.3	875.1	875.1	881.3	888.5	894.1	897.6	992.3	1114.7	0.000139025	1.6685e-07	0.000138858	832.23	29.2024
070p	HU	2014	0.704	1781.4	750	1882.8	968.8	1328.1	1750	778.1	834.6	859.7	870.9	877.6	884.4	881.7	879.3	882.3	884.3	883.7	885.9	888.6	893.6	895.5	898	899	905.3	918.4	1009.2	0.000172027	1.19882e-07	0.000171908	1433.98	31.5654
070p	HU	2014	0.688	925	570.3	1914.1	953.1	1148.4	1726.6	1102	876.7	907.6	917.4	927.9	930.5	934.7	930.8	923.8	922.6	924	920.7	919.8	919.4	924.2	919.1	917.7	917.2	935.4	1044.3	0.00013213	2.10464e-07	0.000131919	626.801	27.9713
070p	HU	2014	0.688	928	757.8	1906.3	937.5	1125	1718.8	574.6	871.3	912.4	927	935.4	936.3	933	932.1	927.3	925.5	922.5	925.5	924.5	921.6	921	922.8	920	922.8	932.8	1023.2	0.000194992	2.01992e-07	0.00019479	964.348	29.8423
073a	HU	2013	0.632	924.2	742.2	1843.8	890.6	968.8	1507.8	749.3	786.6	806.1	822.1	830.1	836.6	845.3	851.5	861.7	872	875.9	885.2	891	898.8	905.6	908.8	916.1	928.9	936.8	1060.8	6.05795e-05	1.37397e-06	5.92055e-05	43.0909	16.3439
073a	HU	2013	0.672	1064.4	773.4	1851.6	898.4	1007.8	1140.6	780.2	804	820.9	834.3	843.5	852.8	861.2	872.8	886.1	895.4	896.3	902.4	909.4	912.6	914.1	933.4	1047.9	1068.7	951.1	1063.2	9.21171e-05	1.60926e-07	9.19562e-05	571.418	27.5695
073a	HU	2013	0.632	863	781.3	1851.6	898.4	984.4	1117.2	790.6	812.3	831.6	845.8	854.2	866.1	873.6	878	889.4	891.1	896.2	896.9	903.6	911.6	900.9	939.7	956.5	997.2	1064.8	964.3	5.06247e-05	1.39272e-07	5.04854e-05	362.495	25.593
073a	HU	2013	0.616	984.1	773.4	1093.8	898.4	976.6	1031.3	769.4	798.1	812.1	837.5	852.6	863.4	873.9	879.9	887.3	895.4	896.2	907.8	917.8	917.2	927.5	960.9	977.1	987.8	1013.6	987.4	8.36961e-05	3.75938e-07	8.33202e-05	221.633	23.4563
073a	HU	2013	0.656	986.2	789.1	1812.5	906.3	992.2	1062.5	740.6	621.9	835.1	845.7	855.1	863.3	867.5	877.3	883.8	889.9	897	906.7	913.4	919.3	940	978.2	998.8	1029.2	1051.1	1058.8	5.07263e-05	1.38972e-07	5.05873e-05	364.01	25.6111
073a	HU	2013	0.592	929.3	796.9	1781.3	906.3	945.3	1039.1	788.6	792.9	824	831.8	849.3	854.3	867.1	873.3	873.3	876.6	880.3	887.3	889.7	897.4	908.8	914.9	918.3	924.5	933.7	931	7.92643e-05	1.02116e-07	7.91622e-05	775.216	28.8942
073a	HU	2013	0.592	961.1	773.4	1890.6	929.7	1015.6	1687.5	788.4	811.5	833.7	846.4	857.3	862.4	871.7	881.7	888.3	891.8	892.6	900.5	905.1	911	919.5	925.8	947.5	964.5	990.1	1059.6	0.00012353	1.14076e-07	0.000123416	1081.87	30.3418
073a	HU	2013	0.592	885.2	773.4	1867.2	890.6	984.4	1117.2	761.9	809.6	824.8	842.2	821	871.6	879.9	884.8	887.2	896.5	896.7	898.4	907.7	912.3	923.8	932.7	937.2	933.6	990.6	956.7	7.44371e-05	1.39467e-07	7.42976e-05	532.727	27.265
073a	HU	2013	0.624	1082.8	765.6	1882.8	921.9	1062.5	1585.9	774	790	819.9	836.5	847.8	851.5	855.8	863	867.6	879.1	883.8	891.7	900.9	906.5	920.9	928	948.6	920.4	958.8	1072.6	0.000177523	1.61915e-07	0.000177361	1095.4	30.3957
073a	HU	2013	0.592	1046.1	765.6	1859.4	914.1	1023.4	1125	779.1	799.5	820	829.5	844	852	862.1	874.7	878.4	885.6	891.4	896.3	897.6	901.1	900	907.4	923.6	995.9	1051.7	1098	0.000213086	1.74149e-07	0.000212911	1222.58	30.8728
073a	HU	2013	0.6	944.9	781.3	1882.8	929.7	1031.3	1132.8	791.4	809.4	828.7	847.9	857.9	866.9	875.6	882.3	888.8	895.1	896.9	902.8	906.6	910.2	920.7	931.3	947.6	952.6	956	1085	0.000237164	1.24623e-07	0.000237039	1902.05	32.7922
073a	HU	2013	0.584	1081.3	796.9	1875	937.5	1031.3	1125	803	823.8	844.7	850.1	860.5	867.2	876	879.8	891.3	897.1	899.4	905.7	907.9	913.7	918.8	937.7	956.5	977.7	949.6	1086.4	0.000223845	1.66287e-07	0.000223679	1345.14	31.2877
073a	HU	2013	0.576	944.6	765.6	1812.5	890.6	960.9	1070.3	776.3	797.2	814.3	838.1	848.1	856	860	864.7	871.1	876.3	882.4	887.5	891.6	902.4	911.6	907.7	911.6	918.7	946.3	1077.4	5.16492e-05	2.37997e-07	5.14112e-05	216.016	23.3449
073a	HU	2013	0.76	973.7	539.1	1781.3	929.7	1007.8	1132.8	554.2	549.7	584.1	757.6	844.7	806.7	885.3	898.3	904.2	914.7	926.6	942.6	955.5	970.7	994.3	979.6	1008.4	1118.1	1103.7	527.2	2.96103e-05	2.13577e-07	2.93967e-05	137.64	21.3874
073a	HU	2013	0.704	918.8	750	1882.8	921.9	1046.9	1601.6	624.6	758.6	800.3	817.5	828.4	841.2	854.7	863.9	874.6	887.4	897	900.1	907.3	911.1	916.1	920.9	957.7	953.2	944.9	925.1	9.11606e-05	1.04846e-07	9.10557e-05	868.474	29.3876
073a	HU	2013	0.688	935.5	781.3	1875	921.9	1000	1593.8	633.8	804.4	828.5	843.2	853.6	862.5	869.9	879.9	890.8	895	901.6	902.4	908.2	913	913.7	917.6	923.8	948.5	1054.2	947.4	0.000143026	1.19519e-07	0.000142906	1195.68	30.7761
073a	HU	2013	0.664	918.3	773.4	1875	914.1	1023.4	1585.9	635.4	729.9	809.2	831.2	845.2	851.5	862.7	864.8	866.3	878.9	886.2	890.5	895.7	903.5	913.7	915.8	918.8	940.9	942.4	1055	9.23215e-05	1.1973e-07	9.22018e-05	770.083	28.8654
073a	HU	2013	0.576	907.3	781.3	1828.1	890.6	945.3	1078.1	794.2	818.6	840.8	855.9	866.8	871.1	878.1	884.6	895	897.8	900.8	903.7	907.6	911.5	913.1	918.7	920.6	925.5	936	940.8	2.95811e-05	5.8824e-08	2.95223e-05	501.875	27.006
073a	HU	2013	0.688	951.5	781.3	1882.8	921.9	992.2	1140.6	703.3	758.6	832.7	848.8	843.4	869.7	882	892.1	896.1	902.2	914.6	917.1	917.5	921.3	925.2	1864.3	954	943.3	1057.3	1057.6	8.8279e-05	1.21379e-07	8.81576e-05	726.302	28.6112
073a	HU	2013	0.656	951.1	765.6	1882.8	914.1	1031.3	1398.4	695.3	809.3	826.3	849.3	863.8	870.5	880.2	887.2	893.5	898.1	907.8	914.9	915.7	917.6	920.4	923.2	930	951.7	942.9	1055.6	5.47838e-05	1.30967e-07	5.46529e-05	417.301	26.2045
073a	HU	2013	0.664	1049.4	781.3	1890.6	929.7	1039.1	1367.2	633.3	803	830	855.9	867	873.1	880.9	886.8	896.7	906.4	916.2	916.4	921.3	929.8	931.8	933	977	937.2	1068.4	1054.9	7.68956e-05	1.22431e-07	7.67731e-05	627.073	27.9732
073a	HU	2013	0.64	918	757.8	1882.8	898.4	992.2	1617.2	769.5	796.7	823.6	840.6	846.4	846	857.9	868.9	877.9	885.4	895.6	901.9	907.9	914.2	913.5	916.9	920	932.4	953.7	943.3	5.19535e-05	1.0871e-07	5.18448e-05	476.91	26.7844
073a	HU	2013	0.64	948.9	781.3	1875	921.9	992.2	1460.9	703.4	800.9	826.3	845	852.4	865.4	874.4	878.7	894.2	898.4	902.3	905.5	913.1	918.6	919.5	925.2	932.1	939.2	953.5	947.1	7.02771e-05	1.06972e-07	7.01702e-05	655.968	28.1688
073a	HU	2013	0.648	952.9	750	1851.6	921.9	1039.1	1148.4	703	799.7	818.7	834.6	844.2	865.8	873.3	874.8	882.4	884	887.5	896	906.5	907.5	914.7	933.1	951.8	970.1	964.2	954.3	4.48401e-05	1.09697e-07	4.47304e-05	407.764	26.1041
073a	HU	2013	0.608	1050.8	710.9	1875	914.1	1031.3	1140.6	772.1	810.7	836.7	854	863	873.2	883.1	887.1	897.9	898.8	900.9	903.7	911.8	915.5	920.4	931.3	954.5	944.3	938.2	1067.8	4.81489e-05	1.12558e-07	4.80363e-05	426.77	26.3019
073a	HU	2013	0.688	951.7	781.3	1859.4	914.1	984.4	1156.3	702.5	811.4	841.3	853.8	867.8	874.6	882.6	886.4	894.3	902.7	906	913.4	916.3	917.6	930.5	940.9	950.1	971	949.2	1057.1	4.49499e-05	1.71898e-07	4.4778e-05	260.492	24.1579
073a	HU	2013	0.688	1041.4	804.7	1859.4	937.5	1015.6	1109.4	619.6	827.6	852.1	846.3	879.7	887.4	898.4	905.6	909	912.7	916.2	918.4	924	929.7	941.7	985.4	1039.5	959.9	1048.8	1061.1	8.02436e-05	1.52357e-07	8.00912e-05	525.68	27.2072
073a	HU	2013	0.616	976.4	789.1	1867.2	921.9	1000	1156.3	771.3	822.9	842.5	854	869.3	877.4	884.6	891.1	896.6	905.1	905.5	913	917	920.5	922.1	923.3	926	979.3	973	1021.3	6.30551e-05	1.48483e-07	6.29066e-05	423.662	26.2702
073a	HU	2013	0.704	1046.5	750	1890.6	914.1	1031.3	1210.9	560.2	787.3	829.8	849.7	858.5	881.6	888.6	898.5	900.5	906.7	913.4	917.6	919.8	927.8	931.8	959.2	970.3	1023.5	1049.3	1072.4	5.75392e-05	1.2508e-07	5.74141e-05	459.019	26.6183
074a	HU	2014	0.56	1008.4	500	1789.1	710.9	859.4	1039.1	620.2	623.5	649	682.1	701.5	716.2	703.4	763.1	779.2	792.7	802.6	810.2	795.4	857.4	874.9	808.7	918.4	552.3	532.4	536.6	3.52783e-07	1.07255e-07	2.45528e-07	2.28921	3.59686
074a	HU	2014	0.688	842.8	500	1671.9	781.3	906.3	1085.9	682.7	690.4	704.8	725	0	775.3	571.6	803.5	533.1	551.7	538.2	537.4	565.7	989.1	572.6	546.7	594.2	642.3	562.2	622.2	9.26636e-07	1.96764e-07	7.29873e-07	3.70939	5.69302	-10
074a	HU	2014	0.656	1032.9	7.8	1710.9	781.3	914.1	1062.5	647.7	665.2	691.9	716.5	742.4	540.5	781.3	796.6	813.6	821.9	841.2	848.1	544.9	908.6	541.7	622.2	1037.2	544.9	599.2	1127.4	5.18586e-07	8.77674e-08	4.30818e-07	4.90864	6.90961	-10	velky noise
074a	HU	2014	0.696	877.1	523.4	1632.8	781.3	914.1	1054.7	592.4	626.1	715.7	729.8	744.9	758.5	777.2	792.8	809.5	831.7	605	558.9	870	890.6	923.2	677.1	542.5	549.9	544.6	1137.7	8.68653e-07	1.46458e-07	7.22195e-07	4.93108	6.92942
074a	HU	2014	0.648	1028	500	1515.6	835.9	945.3	1062.5	525.5	725.3	740.4	749.3	763.8	788.4	598.5	815	832	847.7	857.2	883.6	907.7	933.3	1009.5	1023.7	1047.3	614.4	670.3	577.5	1.03598e-06	8.60451e-08	9.49935e-07	11.04	10.4297
074a	HU	2014	0.696	904.8	539.1	1140.6	796.9	914.1	1031.3	631.4	613.4	736.2	749.2	780.9	795.1	628.4	567.7	822	847.3	856	868.7	893.3	549.2	1006.5	984.3	1025.2	1053	978.5	553.7	9.73717e-07	1.02468e-07	8.71249e-07	8.50268	9.29556
074a	HU	2014	0.64	883.2	492.2	1390.6	796.9	914.1	1046.9	665	702.1	722.8	742	762.9	785.8	797.2	807.3	813.4	822.3	847.3	861.1	868.3	882.8	913	998.2	524.6	1049.9	1067.2	752.4	1.82206e-06	5.51343e-08	1.76692e-06	32.0476	15.058
074a	HU	2014	0.656	873.4	546.9	1164.1	789.1	890.6	1046.9	678.8	549	710	520	752.6	776.7	785	801.3	817.1	825.6	835.9	851.7	559.6	878.3	884.4	589	1046.3	1070	1076.2	1076.6	1.06028e-06	7.02813e-08	9.89998e-07	14.0862	11.4879
074a	HU	2014	0.664	884	679.7	1429.7	812.5	906.3	1046.9	713.1	709.8	728.2	588.4	764.7	786.1	811.5	817.6	826.8	836.4	850	869.2	879.7	898.7	918.8	911	1038.8	919.9	547.7	547.3	1.04855e-06	8.57983e-08	9.62754e-07	11.2211	10.5004
074a	HU	2014	0.608	898.8	500	1820.3	781.3	890.6	1031.3	695.4	713.3	732.7	735.1	564.4	630.2	794.2	812.5	817.2	831.9	844.8	567.3	871.3	889.1	895.1	924.2	905	554.7	584.2	1097.2	2.89122e-07	8.37187e-08	2.05403e-07	2.45349	3.89784
074a	HU	2014	0.624	904	492.2	1187.5	835.9	937.5	1046.9	653.5	734.3	748.3	761.6	785.4	801.1	817.4	825.4	837.9	844.7	866.1	874	506.2	899.9	924.6	918.2	1010.9	1043.8	1047.5	561	1.93834e-06	5.21529e-08	1.88618e-06	36.1664	15.5831
074a	HU	2014	0.688	875.6	601.6	1773.4	812.5	921.9	1046.9	639.1	700.3	717.7	739.6	762	771.8	793.8	810.6	826	830.7	851.3	866.7	884.9	901.7	947.2	976.7	1000.3	1045	1090.7	562.5	1.34223e-06	8.8753e-08	1.25348e-06	14.1232	11.4993
074a	HU	2014	0.64	1069.4	671.9	1195.3	843.8	960.9	1078.1	546.8	712.9	743.7	759.6	780.9	807	820.6	824.6	833.1	833.8	856.8	878.1	898.3	925.4	939.8	997.2	968.1	1078.3	1086.9	1133.6	2.56035e-06	1.10439e-07	2.44991e-06	22.1834	13.4603
074a	HU	2014	0.672	1043.3	546.9	1656.3	812.5	937.5	1078.1	678.3	708.1	725.6	748.5	759.5	783.9	810	820.3	825.9	846.9	857.7	874	565.6	924.8	924.8	921.2	1042.1	1057.3	1089.2	570.6	8.0669e-07	5.93204e-08	7.4737e-07	12.5989	11.0033
074a	HU	2014	0.608	909	523.4	1132.8	812.5	906.3	1031.3	533.7	714.1	602.5	610.4	764.3	778.4	579.6	538.9	546.3	602.2	602.5	537.5	578.4	899.8	912.4	939.5	1027.3	622.5	548.9	533.9	1.54149e-06	7.31526e-08	1.46834e-06	20.0722	13.026
074a	HU	2014	0.688	906	515.6	1257.8	796.9	921.9	1070.3	621.2	695.7	540.6	542.7	535.8	570.6	558	554.2	593.5	847.8	873	886.6	912	562.2	541.7	540.2	575.9	1067.2	530.3	573	5.40878e-07	6.02635e-08	4.80614e-07	7.97521	9.01742
074a	HU	2014	0.648	876	507.8	1843.8	812.5	929.7	1117.2	677.4	743.4	758.5	767	781.3	804	832	829	849	854.5	872.1	900.1	904.1	655.1	915	910.3	610.4	526.8	534.4	1135.9	6.7302e-07	6.62548e-08	6.06765e-07	9.15806	9.61803
074a	HU	2014	0.624	931.9	515.6	1765.6	812.5	921.9	1070.3	650	723.4	746	755.9	768.1	787.9	812.5	827.4	834.5	841.4	860	872.3	906	931	937.7	627.5	933	976.1	927.5	584.1	8.25353e-07	5.88638e-08	7.66489e-07	13.0214	11.1466
074a	HU	2014	0.608	882.1	515.6	1656.3	812.5	914.1	1039.1	710.3	716.4	733.3	763.8	789.5	799.6	809.9	829.9	848.2	549.3	530.7	562	890.3	897.9	556.2	932	536.2	529.3	538.2	550.4	1.02421e-06	7.83615e-08	9.45852e-07	12.0704	10.8172
087a	HU	2013	0.712	1007.3	679.7	1796.9	882.8	1000	1109.4	692.2	718.3	743.2	772.4	790.2	799.4	811.9	823.6	836.3	853.9	862.7	874.3	887.5	917.5	944.1	979	1010.6	1072.3	1040.3	926.8	3.52181e-05	1.83867e-07	3.50343e-05	190.541	22.7999
087a	HU	2013	0.688	1031.8	750	1851.6	945.3	1046.9	1570.3	763	799.5	812.9	826.6	843.6	854.9	863.8	868.4	874.7	887.4	886.5	888.7	898.4	914.8	913.4	944.1	985.1	1024.5	1076.7	1030	0.000104034	2.23352e-07	0.00010381	464.784	26.6725	-20
087a	HU	2013	0.712	1071.7	734.4	1867.2	953.1	1062.5	1515.6	985.2	734.1	768.3	795.1	804.1	818.4	827.6	829.1	846.8	863.8	864	884	888.3	910.7	927.9	944.9	954.8	1029.8	1077.9	1068.7	0.00015351	1.63589e-07	0.000153346	937.386	29.7192	-10
087a	HU	2013	0.688	1065.7	757.8	1851.6	960.9	1062.5	1515.6	742.1	758	767.5	791.2	805.6	823.1	837.1	835.8	845.3	855.9	863.7	876.7	902.7	901.5	904.3	917.2	978	1054.1	1066.4	890.7	0.00019219	2.01005e-07	0.000191989	955.145	29.8007	-20
087a	HU	2013	0.68	1070.4	765.6	1867.2	953.1	1046.9	1554.7	769.8	796.3	817	845.3	862.5	869.4	875.3	893.6	900.8	913	919.4	928.1	935.7	944.2	946.1	964.4	983.8	1061.4	1065	943.6	0.000197207	4.84621e-07	0.000196723	405.931	26.0845
087a	HU	2013	0.68	1099.4	750	1859.4	976.6	1054.7	1125	756.1	778.6	799.5	823.1	839.7	858.2	863.1	866.9	879.3	897.2	899.6	912.9	928.4	956.9	972.6	996.7	1031.5	1093	1108.2	1049.8	0.000253927	8.99455e-08	0.000253837	2822.12	34.5058
087a	HU	2013	0.68	1087.4	750	1843.8	960.9	1046.9	1304.7	731.2	774.5	783.7	798.7	818.4	826.2	840.5	849.7	858.8	870	882.7	889.8	907.7	949.8	950.3	957.3	974.2	1054	1046.7	1038.2	0.000171657	1.45543e-07	0.000171512	1178.43	30.713
087a	HU	2013	0.672	1061	750	1875	953.1	1062.5	1562.5	737.9	761.8	785.9	810.4	821.9	833.6	845.9	855.4	860.6	863.1	878.6	893.7	907.9	917.2	924.8	953.2	952.3	1056.9	1080.9	958.5	0.000160854	1.43319e-07	0.000160711	1121.35	30.4974
087a	HU	2013	0.776	1054.9	734.4	1867.2	945.3	1070.3	1539.1	862.3	900.2	777.7	798	816.5	835	852.2	865.6	879.2	893.5	900.6	909.3	923.3	989.7	1002.8	1037.9	1096	1108.6	1006.9	925.4	7.73106e-05	9.37665e-08	7.72168e-05	823.501	29.1566
087a	HU	2013	0.632	1057.2	781.3	1882.8	960.9	1039.1	1601.6	786.6	817.2	845.7	860.3	878.7	883.4	893.9	913.9	924.8	933.4	935.4	944.1	951.8	969.8	976	982.2	986.3	1009.2	1063.6	1003.8	0.000224651	8.3351e-08	0.000224568	2694.24	34.3044
087a	HU	2013	0.64	1069.6	773.4	1875	968.8	1046.9	1484.4	781.9	812	839.4	866.3	881.7	894.1	907.6	919.8	928.3	931.8	940.3	953.5	964.1	968	975.4	985.7	1001.7	1024.7	1076.5	1040.5	0.000276964	9.01604e-07	0.000276063	306.191	24.8599
087a	HU	2013	0.584	1061	828.1	1867.2	976.6	1046.9	1101.6	834.7	848.6	872.1	892.3	910.5	927.2	926	923.9	932.8	936.9	948.6	957.9	968.5	973	985.7	997.8	1037.3	1063.5	1080.8	1028.2	0.00032909	6.60899e-07	0.000328429	496.943	26.9631
087a	HU	2013	0.64	1054.7	796.9	1867.2	968.8	1039.1	1539.1	804.2	818.3	838.9	862.1	881.6	894.3	902.3	913.8	922.2	935.7	934.4	951.1	956.3	970.9	990.3	996	1017.5	1039.9	1023.4	1065.7	0.000290198	7.4856e-07	0.00028945	386.675	25.8735
087a	HU	2013	0.656	1010.5	757.8	1875	937.5	1015.6	1648.4	759.3	779.1	804	818.6	842.2	857.5	862.8	863.7	865.7	875.7	897.8	913.1	920.2	936.6	941.1	944.9	977.9	1004.4	1017	1014.6	0.000224359	1.17827e-06	0.000223181	189.414	22.7741
087a	HU	2013	0.616	1070.4	773.4	1882.8	945.3	1054.7	1656.3	805.5	841.7	832.4	839.8	858.9	882.5	899.1	908	912.4	915.6	914.2	912.4	920	930.3	949.6	985.7	977.1	1060.9	1076	917	0.000155239	1.06434e-06	0.000154174	144.854	21.6093
087a	HU	2013	0.608	1070.2	804.7	1875	960.9	1046.9	1109.4	820.7	846	874.8	895.8	917	929.5	937	948.2	960.2	964.1	974.9	994.2	1006.4	1024.9	1037.3	1053	1075.5	1096.7	1101.9	1041.8	0.000321594	8.24777e-08	0.000321511	3898.16	35.9086
087a	HU	2013	0.608	1069.6	820.3	1882.8	960.9	1039.1	1101.6	822.8	854.6	874.7	897.8	922.3	930.8	947.8	969.3	980	985.3	987.9	991.9	1009.6	1033.5	1051.8	1063.5	1075	1089.2	1089.4	1046.8	0.000394232	8.88801e-08	0.000394143	4434.55	36.4685
087a	HU	2013	0.784	1082	796.9	1875	945.3	1046.9	1117.2	643.7	846	855.9	888.8	912.2	923.1	931.4	939.4	964.3	982	918.3	928.1	930.7	1056.3	1081	1089	824.6	1009.5	911.4	1056.3	7.14064e-05	7.64013e-08	7.133e-05	933.623	29.7017
087a	HU	2013	0.6	1060.5	789.1	1867.2	968.8	1054.7	1132.8	807	829	857	878.3	898.8	915.7	926.6	940.9	945.2	957.3	972.3	976	983.7	999.3	1012.4	1032	1053.9	1081.2	1108.6	1039.5	0.000151229	1.00615e-07	0.000151129	1502.05	31.7669
087a	HU	2013	0.592	1062.1	843.8	1851.6	976.6	1054.7	1109.4	831.8	857.8	883.3	905.5	926.3	946.5	956.3	967.1	969.6	980.8	983.1	992.2	998.1	1028.1	1051	1059	1068.3	1082.9	1082.8	1034.2	0.000178063	2.89731e-07	0.000177773	613.579	27.8787
087a	HU	2013	0.584	1055.3	843.8	1851.6	976.6	1054.7	1117.2	843	862.8	858.6	872.4	891.8	902.5	917.9	922.8	930	944.5	964.6	981.3	998.4	1007.6	1025.7	1046.5	1064.9	1096.3	1096.6	1037.7	0.000209437	1.59674e-06	0.00020784	130.166	21.145
087a	HU	2013	0.584	1078	789.1	1859.4	968.8	1054.7	1117.2	798.2	819.4	842.8	862.9	883.3	903	919	927.4	937.2	961.5	969.9	982.9	1009.3	1029.4	1034.5	1054.6	1069.5	1090.9	1104	1056.1	0.000234593	8.0845e-07	0.000233784	289.176	24.6116
094a	HU	2013	0.6	883.4	492.2	1828.1	843.8	1140.6	1578.1	1081.5	719.1	749.5	754.5	737.4	800	812.5	824	822.5	756.5	764.5	758	843.7	849.2	858.6	866.8	871	886.2	886.5	890	3.64028e-06	2.83935e-07	3.35635e-06	11.8208	10.7265
094a	HU	2013	0.624	875.5	609.4	1828.1	882.8	1320.3	1625	1069	722.6	751	768	784.6	763.6	806.1	809.9	816.7	826.6	838.5	845.8	853.7	861	865.9	870.5	829.7	836.1	830	877.5	4.19569e-06	9.96378e-08	4.09605e-06	41.1094	16.1394	-15
094a	HU	2013	0.608	1634.9	601.6	1734.4	1054.7	1429.7	1601.6	1051.8	697.5	719.2	741.5	749.7	764.6	749.6	794.5	797.9	812.7	823.9	814.7	808.8	813.5	816.9	818.2	820.1	834.3	841.7	818.6	2.8285e-06	4.71598e-07	2.35691e-06	4.9977	6.9877	-10
094a	HU	2013	0.6	882.5	546.9	1828.1	890.6	1429.7	1632.8	571.2	580.3	737.2	753.5	767.7	756.3	758.8	805.3	804.8	808.6	824.3	836.2	809.9	853.1	856.2	858.5	864.4	868	888.7	849.8	4.0293e-06	2.87543e-08	4.00055e-06	139.128	21.4342	-10
094a	HU	2013	0.712	910	539.1	1875	921.9	1453.1	1640.6	586.9	611.6	1597	696.1	743.5	767.8	781.1	796.8	805.2	811.3	816.6	829.5	837.1	839.1	849.6	858.8	867.8	869.2	865.8	865.9	4.84489e-06	1.70039e-07	4.67485e-06	27.4928	14.3922
094a	HU	2013	0.624	882.2	492.2	1851.6	789.1	1164.1	1601.6	1078.4	711.4	756.2	767	788.5	805.1	763.8	571.4	822.5	828.2	826.7	841.5	848.2	850.7	859.3	875.7	875.9	886.2	889.7	835.5	3.11856e-06	7.07066e-07	2.41149e-06	3.41056	5.32826
094a	HU	2013	0.736	889.2	507.8	1851.6	867.2	1250	1609.4	531.4	550.8	542.2	717.6	759	757.2	804.2	813.6	823.8	823.8	808	841.7	851.1	776.7	867.5	875.7	850.2	897.7	886	890.9	4.86096e-06	5.01109e-07	4.35986e-06	8.70041	9.3954
094a	HU	2013	0.608	901.1	710.9	1882.8	906.3	1375	1648.4	582	740.5	763.7	784.9	807.1	810.8	814.8	819.7	825.5	827	836.9	838.1	838	838.1	845.8	851.8	855	879.7	854.6	849.5	6.36761e-06	1.15074e-07	6.25254e-06	54.335	17.3508
094a	HU	2013	0.704	1628.7	515.6	1851.6	898.4	1453.1	1648.4	1521.7	1545.9	526.9	644	755.9	758.4	788	799.1	1617.4	813.2	818.4	821.1	827.7	829.6	831.5	837.5	860.8	867.1	873.8	841.8	4.86803e-06	3.85516e-07	4.48251e-06	11.6273	10.6548
094a	HU	2013	0.592	898.6	695.3	1851.6	898.4	1351.6	1648.4	1118.2	721.7	760.1	788.8	808.7	817.4	827.9	834.6	834.8	840	841.8	845.5	852.8	855	859.7	856.2	856.7	880.2	905.2	846.6	6.50186e-06	3.57074e-08	6.46615e-06	181.087	22.5789
094a	HU	2013	0.608	881.2	718.8	1843.8	906.3	1453.1	1664.1	1077.2	743.7	771.5	795.1	764.8	825.3	834.1	838.9	844.5	846.8	857.8	862.4	865.7	866.8	869.1	872.4	882.3	878.2	887.2	875	8.31671e-06	2.45549e-06	5.86122e-06	2.38698	3.7785
094a	HU	2013	0.608	1679.3	710.9	1789.1	1062.5	1460.9	1656.3	577.9	736.9	772.3	789.9	1440.5	1460.8	826.7	834.8	831.5	832.7	835.5	835.4	794	845.4	853.2	858.8	866.4	864.6	874.3	844.6	8.9906e-06	2.74351e-06	6.24709e-06	2.27704	3.57371
094a	HU	2013	0.624	1686.7	523.4	1828.1	929.7	1460.9	1671.9	546.9	752.2	781.6	739.3	810.9	823.6	828.3	833.4	834.4	838.6	840.7	854	861.1	858.8	863.6	870.5	880.8	889	886.4	869.9	7.5538e-06	2.69481e-06	4.85899e-06	1.80309	2.56017
094a	HU	2013	0.584	891.3	718.8	1843.8	921.9	1468.8	1671.9	550.1	706.7	737.7	757.8	795.5	811	817.2	1432.5	1457.6	835.6	838.8	853	848.9	851.8	857.5	865.9	853.8	862	900.6	880.1	6.32822e-06	9.3707e-07	5.39115e-06	5.7532	7.59909
094a	HU	2013	0.608	1679.4	601.6	1812.5	929.7	1460.9	1664.1	543.4	749.7	786.1	805	817.9	825.5	1468.2	844.2	841.7	768.4	850.1	850.3	857.3	858.3	870.7	870.5	869.5	867.1	873.9	880.9	6.15742e-06	8.29093e-07	5.32832e-06	6.42669	8.07988
094a	HU	2013	0.592	886	718.8	1851.6	914.1	1492.2	1679.7	0	723.4	770.3	795.9	809.2	789.4	826.8	835.3	838.5	837	837.8	843.4	846.9	859.7	869.1	876.8	886.1	893.9	903.4	882	6.27098e-06	4.37806e-07	5.83318e-06	13.3237	11.2462
094a	HU	2013	0.592	885.9	726.6	1882.8	921.9	1445.3	1656.3	644.6	750.8	744	803.9	812.9	825.4	831.4	794	836.3	838	844.8	851.6	859.3	869.1	868.7	870.7	877.7	884.4	918.8	909.1	6.41624e-06	2.44638e-07	6.1716e-06	25.2275	14.0187
094a	HU	2013	0.576	1636.5	718.8	1843.8	929.7	1476.6	1648.4	1086.5	707.4	752.5	776.2	738.6	801.9	773.8	770	818.6	825.2	828.7	838.3	838.6	843.2	847.4	846.9	844.4	861.5	898.2	824.8	4.82691e-06	1.57323e-07	4.66959e-06	29.6815	14.7249
094a	HU	2013	0.592	887.5	632.8	1835.9	914.1	1460.9	1656.3	1078.4	1447.2	761.5	774.6	793.1	807.6	777.4	827.4	832.1	831.4	767.8	841	850.2	853.9	864.2	871.9	877.2	890.2	897.8	871.7	5.58228e-06	2.15965e-06	3.42263e-06	1.58481	1.99977
094a	HU	2013	0.656	1672.4	640.6	1820.3	1054.7	1476.6	1656.3	1086.6	743.9	773.4	789.4	811.1	822.4	830	1421.1	837.2	834.7	838	841	859.1	857	857.1	801.6	798.1	868.4	875.1	870.9	4.63857e-06	4.38384e-07	4.20019e-06	9.58107	9.81414
101a	HU	2013	0.56	1028.4	859.4	1078.1	929.7	1000	1046.9	877	905.9	934.2	987.6	1017.3	1037.4	1043.1	1041.3	1035	1025.2	1022.3	1009.7	611	980.5	947.3	928.1	894.8	887.5	895.2	883.5	1.22263e-05	1.84537e-07	1.20418e-05	65.254	18.1461
101a	HU	2013	0.584	1029	859.4	1406.3	937.5	1015.6	1070.3	877	617.2	931.4	989.9	1020.8	1037.6	1035.4	1033.9	1027.4	1020.6	1010	996.2	963.3	934.8	906.7	883.8	878.7	872.3	896.3	886.4	1.4431e-05	1.23106e-07	1.43079e-05	116.225	20.653	-20
101a	HU	2013	0.568	1029.2	859.4	1085.9	937.5	1007.8	1046.9	885.6	905.1	939.5	914.7	1027.5	1030.1	1029.2	1045.2	1035.6	1025.5	1015.2	995.5	984.1	947.5	914.3	889.9	881.6	879.3	606	882.9	1.44497e-05	1.3416e-07	1.43156e-05	106.705	20.2818	-10
101a	HU	2013	0.44	1033.8	859.4	1632.8	968.8	1039.1	1281.3	890.2	912.7	611.7	988.1	1021.8	1030.8	533.1	538.6	1042.3	1030.9	1043.7	1052.8	1041.3	1026	1009.4	988	951.1	918.6	887.7	869	1.04048e-05	2.36983e-07	1.01678e-05	42.9054	16.3251	-15
101a	HU	2013	0.56	1024.4	851.6	1171.9	953.1	1023.4	1078.1	885.9	934	968.9	1005.9	1024.9	1031.3	1034.5	1028.4	1041.4	1033.3	1020.6	1005.7	984.7	948.5	921.7	854	882.3	799.1	896.5	868.8	1.23324e-05	4.21997e-07	1.19104e-05	28.224	14.5062
101a	HU	2013	0.56	1029.1	593.8	1101.6	937.5	1015.6	1070.3	884.3	928	619.3	1012.4	602.1	1034.8	1043	1030.6	607.7	1044.1	1032.7	1017.8	990.8	970.2	932.8	908.7	906.7	888.6	896.4	884	1.24877e-05	4.38011e-07	1.20497e-05	27.5099	14.3949
101a	HU	2013	0.592	1032	539.1	1664.1	937.5	1023.4	1101.6	820.8	918.2	961.5	565.8	563.7	1040.6	1036	597.7	1041.8	560.1	1016	993.1	976.1	946.4	912.3	890.1	885.2	878.6	897.8	886.6	1.24309e-05	1.17928e-06	1.12516e-05	9.54115	9.79601
101a	HU	2013	0.568	1033.1	859.4	1093.8	937.5	1007.8	1054.7	881.7	925.8	620.1	1007	1034.4	1064.4	1053.3	1041.5	1033	1049.5	1032.8	1005.2	982.8	944.3	917.2	889.5	878.6	881.6	892.6	888.6	9.57762e-06	2.37746e-07	9.33988e-06	39.2851	15.9423
101a	HU	2013	0.504	1029.7	859.4	1093.8	945.3	1015.6	1062.5	962.3	999.4	1015.1	559.6	538.6	537.2	1039.5	1029.3	1049.4	1039.5	1016.8	997.6	981.8	940.6	916.8	897.1	883.3	886.5	895.8	884.1	8.03329e-06	2.32128e-07	7.80116e-06	33.6071	15.2643
101a	HU	2013	0.544	1032	609.4	1093.8	937.5	1015.6	1062.5	892.3	920.8	961	911.8	567.7	1038	1041.2	1021.5	1042.7	1041.2	1029.1	1015.4	1017.9	961.1	922.3	902.7	889.6	885.3	892.8	882.9	1.07175e-05	1.28168e-06	9.43585e-06	7.36211	8.67003
101a	HU	2013	0.544	1033.9	859.4	1093.8	937.5	1007.8	1054.7	886.1	622.3	969.5	1005.3	1029.2	1045.8	1052.5	1035.2	1031	1048.1	1036.4	1014.1	993	968.8	916.7	891.6	886.4	889.7	898.8	886.7	9.85375e-06	1.8191e-07	9.67184e-06	53.1682	17.2565
101a	HU	2013	0.632	1030.1	570.3	1085.9	921.9	1007.8	1062.5	1502.4	597.9	640.1	920.5	964.9	1003.1	1034.7	550.9	1041.2	594	1035.1	609.5	1008.7	975.7	923.3	613.9	884.3	632.8	916.3	890.8	1.1429e-05	5.54354e-07	1.08746e-05	19.6167	12.9263
101a	HU	2013	0.544	1032	554.7	1601.6	937.5	1023.4	1250	890.2	926.8	960.5	994.4	1024.7	521	534.7	1036.1	1033.8	1046.6	579	515.7	1005.6	978.8	930.5	914.5	889.9	888.9	912.6	888.1	1.18982e-05	6.11335e-07	1.12869e-05	18.4627	12.6629
101a	HU	2013	0.536	1027.7	859.4	1117.2	945.3	1015.6	1062.5	889.3	926.5	966.6	998.3	1031.6	537.8	1074.9	0	1032.5	1047.3	1034.8	1020.5	988.4	968	922.9	894.1	879	872.7	889.9	879.7	1.08597e-05	4.55922e-07	1.04038e-05	22.8192	13.583
101a	HU	2013	0.544	1029.6	859.4	1109.4	953.1	1015.6	1054.7	859.8	931.9	973.6	1006.3	1037.8	1021.3	1072	950.5	1033.2	1050.5	1038.4	1023.3	1005.7	985.1	934.5	911.6	881.1	873.1	897.3	878	1.1825e-05	1.379e-07	1.16871e-05	84.7505	19.2814
101a	HU	2013	0.56	1028.6	851.6	1117.2	945.3	1015.6	1054.7	895.6	932.6	968.8	1010.6	983.1	1081.2	1066.9	952	1031.7	1042.5	1029.2	1000.8	978.3	942.8	922.4	894.1	884	867.6	885.4	879.6	1.05237e-05	4.58651e-08	1.04778e-05	228.449	23.5879
101a	HU	2013	0.592	1036.1	843.8	1093.8	937.5	1007.8	1046.9	882.3	916.2	942.4	996	1036.9	1064.1	1045.1	1026.3	1042.4	1033.5	1018.3	994.3	973.1	926.7	891.7	867.2	862.2	875.3	897.7	888.8	1.17975e-05	3.92923e-08	1.17582e-05	299.25	24.7603
101a	HU	2013	0.504	1029	867.2	1125	953.1	1015.6	1054.7	856.6	930	958.8	997.8	1028.8	1040.3	1091.4	1063.7	1035.8	1028.7	1042.3	1032.7	1022.1	988.7	952.1	921.2	886.3	894.9	905.8	881.9	1.42809e-05	4.20648e-08	1.42388e-05	338.498	25.2956
101a	HU	2013	0.56	1030.6	867.2	1921.9	945.3	1007.8	1054.7	893.6	926.5	971.2	1000.7	957.5	1060.1	1058.6	956.2	1024.1	1032.5	1031.9	1007.8	978.9	951.5	923	901	894.7	891.6	908.4	899.4	1.64791e-05	5.04681e-08	1.64286e-05	325.524	25.1258
101a	HU	2013	0.552	1025.5	867.2	1875	945.3	1007.8	1054.7	897.5	929.9	980.3	1002	1041.4	1855.3	1063.5	954.9	1020.8	1029.3	1022.8	1002.7	981	945.6	926.4	913.3	894.1	888.8	901.9	883.8	1.47615e-05	7.37391e-08	1.46878e-05	199.186	22.9926
101a	HU	2013	0.536	1023.9	859.4	1109.4	945.3	1007.8	1046.9	885.8	921.7	960.2	991.8	947	1070.9	1070.2	1048.5	1027.2	1017.9	1026.4	1013.7	989.3	975.9	934.6	914.5	883.1	871.8	880.3	875.8	1.3367e-05	7.40904e-08	1.32929e-05	179.415	22.5386
101a	HU	2013	0.544	1024	851.6	1890.6	945.3	1007.8	1054.7	883.2	921.7	972.1	999.8	1045.1	1067.6	1058	960.9	1020.8	1027	1024.5	992.7	979.2	934.3	909.6	883.9	864.4	869.8	897.9	880	1.35523e-05	4.17435e-08	1.35106e-05	323.656	25.1008
101a	HU	2013	0.536	1024.9	851.6	1117.2	945.3	1015.6	1054.7	873.5	918.9	965	992.8	1038.8	1074.8	1077.6	1055.6	964.6	1018.6	1029.4	1017.3	989.4	971.8	923.5	907.8	879.6	867.4	878.2	869.2	1.50649e-05	1.25053e-07	1.49399e-05	119.468	20.7725
101a	HU	2013	0.552	1027.6	851.6	1093.8	937.5	1000	1046.9	860.8	921.1	971.8	996.7	984.7	1053.2	1054	1038.4	1042.7	1041	1022.3	1005.3	984.1	938.5	919.9	885.2	871	872.5	891.5	880	1.52039e-05	4.1249e-08	1.51627e-05	367.59	25.6536
101a	HU	2013	0.552	1027.8	851.6	1109.4	937.5	1007.8	1054.7	872.2	914.2	965.4	992.2	1032.3	1074.7	1067.8	1045.4	1025.6	1045	1030.5	1016.1	985.4	949.9	926.3	902.7	876.5	872.4	885.2	861.3	1.39478e-05	3.03474e-08	1.39175e-05	458.605	26.6144
101a	HU	2013	0.536	1023.8	851.6	1156.3	945.3	1015.6	1062.5	878.6	942.7	972.9	1004.4	1035.3	975.2	1107.2	1060.3	960	1026	1041.6	1025.7	991.9	974.8	926.3	907.3	891.1	883.7	890.2	874.7	1.36209e-05	4.16345e-08	1.35793e-05	326.154	25.1342
101a	HU	2013	0.544	1029.6	851.6	1882.8	945.3	1007.8	1054.7	870	919.4	973.7	999.5	1040.6	1087.4	1078.8	1052.9	960.4	1028.2	1036	1011.3	990.2	969.9	931.1	910.4	884.5	878.7	887	871.3	1.40453e-05	4.97252e-08	1.39956e-05	281.458	24.4941
105a	HU	2014	0.864	1122.7	539.1	1875	898.4	1117.2	1359.4	549.5	578.2	616.1	641.3	685.6	707.7	751.2	783.6	807.8	831.4	844	858.1	884.4	901.3	915.8	947.8	1112.7	1136.3	1172.8	729.6	0.000156353	2.72607e-06	0.000153627	56.3545	17.5093
105a	HU	2014	1.136	1218.9	531.3	1875	937.5	1156.3	1375	701.5	967	543.9	598.9	638.5	538.8	747.7	706.2	796.3	820.5	850.1	896.7	930	1102.5	1121.7	1162.1	1206.6	782.2	772.5	614.4	0.000241092	1.81244e-05	0.000222968	12.3021	10.8998
105a	HU	2014	0.952	1209.9	531.3	1875	960.9	1156.3	1453.1	1014.9	575.6	619.4	662.9	722.9	764	788	809.4	824.2	840.6	858.8	881.9	895	930.9	1085.6	553.7	1133.3	1159.6	1200.9	596.6	0.000336391	2.52555e-06	0.000333865	132.195	21.2122
105a	HU	2014	0.976	953.1	531.3	1890.6	929.7	1179.7	1515.6	1001	558	587.5	623.9	670	707.8	748	768.4	788.8	806	824.6	841.9	870.3	914.6	952.5	1129.8	1150	1174.9	1217.6	551.7	0.000201694	5.67945e-06	0.000196015	34.513	15.3798
105a	HU	2014	0.896	1070.4	531.3	1867.2	960.9	1109.4	1234.4	611.7	640.2	568.3	746.8	792.9	827.2	855.6	868.6	896.1	908	925.5	947.1	1042.2	1067.4	1097.1	1123.5	1140.1	1157.4	555	578.6	0.000348386	3.41327e-06	0.000344972	101.068	20.0461
105a	HU	2014	1.128	1049.5	585.9	1867.2	953.1	1117.2	1390.6	664.4	665.8	611.3	662.6	723.2	784.5	821.9	842.8	875.8	891	914.7	948.3	1049.7	1046.8	1069.9	1108.5	1128.6	1182	1223.9	610	0.000243533	5.02867e-06	0.000238504	47.4289	16.7604
105a	HU	2014	1	988.9	593.8	1890.6	960.9	1117.2	1304.7	519.6	597.4	647.1	687.8	750.7	784.3	823	843.9	870.5	893.4	898.5	914.2	930.6	951.2	984.1	1019.5	1159.5	1181.1	1193	591.6	0.000657055	1.00608e-05	0.000646994	64.3087	18.0827
105a	HU	2014	0.944	1146.3	609.4	1898.4	976.6	1148.4	1367.2	597.3	652.2	691.3	745.7	783.5	820.1	853.2	864.9	877.9	889.5	895.9	913.6	931.9	944.6	962.5	983.8	1136.8	1161.6	1200.7	596.6	0.000887513	1.38008e-05	0.000873713	63.309	18.0147
105a	HU	2014	0.816	1186	523.4	1867.2	953.1	1070.3	1210.9	628	664.8	715	764.4	803.8	828.9	856.4	873.8	893.2	903.6	921.4	942	950.5	960.5	541.3	991.5	1002	1157.6	1192.7	581	0.000495607	3.08336e-06	0.000492524	159.736	22.034
105a	HU	2014	0.872	1196.9	515.6	1898.4	945.3	1148.4	1515.6	588.4	628.5	635.5	737.3	759.7	783.9	815.2	847	858	872.6	884.1	895.5	921.1	927.8	936.3	972	1023.8	1141.2	1195	587.7	0.000194636	5.30395e-06	0.000189332	35.6963	15.5262
105a	HU	2014	0.904	1057.2	695.3	1890.6	992.2	1125	1367.2	622.1	696.3	751.1	807.5	840.9	863.7	880.4	903.9	912.4	921.8	954.8	996.9	1046.6	1080.7	1102.2	1123.7	1142.8	1169.5	1204.9	615.5	0.000644917	5.82037e-06	0.000639096	109.803	20.4062
105a	HU	2014	0.856	992.6	703.1	1875	1000	1117.2	1226.6	650.5	699.8	760.2	799.1	841.8	871.9	885.9	901.1	915.4	924.9	956.9	1036.9	541.5	987.7	1075.9	1115.4	1145.6	1168.2	1208.5	1160.3	0.000757916	1.08258e-05	0.00074709	69.0101	18.3891
105a	HU	2014	0.904	1105.2	703.1	1882.8	992.2	1140.6	1367.2	655.7	698.8	747.9	791.9	822.4	848.4	877	891.6	904.3	914.5	924.6	937.7	971	986.5	1100.2	1138.4	1153.3	587.5	1225.1	598.4	0.000868542	5.85446e-06	0.000862688	147.356	21.6837
105a	HU	2014	0.888	1122.1	625	1898.4	976.6	1132.8	1429.7	599.4	649.2	705.4	745.1	785	813.1	840.2	854.5	864.7	866.7	894.4	909.4	908.8	935.1	968	968.5	1053.7	1125.4	1196.8	566.6	0.000776169	5.84171e-06	0.000770327	131.867	21.2014
105a	HU	2014	0.888	1019.1	710.9	1890.6	992.2	1117.2	1367.2	651.5	673.9	715.6	765.3	810.6	835.4	854.6	873.7	882.9	903	924.9	930.1	963.2	975.9	1021.9	1100.3	1125.4	1157.8	1183.6	1154.7	0.00104247	4.09406e-06	0.00103838	253.631	24.042
105a	HU	2014	0.88	1111.7	515.6	1890.6	976.6	1101.6	1414.1	675.6	678.2	711.2	755	788.7	817.5	829.9	855.5	882.3	893.3	907.4	923.4	931.1	943.3	979.3	986.1	1066.1	1124.4	1160.4	544.4	0.000862587	3.83881e-06	0.000858749	223.702	23.4967
105a	HU	2014	0.848	1094	718.8	1906.3	1007.8	1109.4	1234.4	703.5	728.9	804.2	840	875.4	890.1	890	889.1	910.4	930.9	947.1	971.8	988	1014.1	1078.1	1103	1139.1	1157.1	1187.7	1189.9	0.00137375	1.18766e-05	0.00136188	114.668	20.5944
105a	HU	2014	0.832	1089	757.8	1890.6	992.2	1101.6	1195.3	761.8	782.5	846.2	885.7	899.4	905.8	921.7	937	949.1	962	963.3	979.8	990.2	1012.3	999.3	1091.2	1114.7	1157.8	1180	1148.8	0.00116139	8.58293e-07	0.00116053	1352.14	31.3102
105a	HU	2014	0.824	1062.6	781.3	1898.4	1015.6	1109.4	1218.8	748.8	793.1	850.3	893	920.8	929.5	940.3	958.1	970.5	983.8	1005.1	1023.6	1061.1	1094.3	1090.7	1116.3	1125.9	1167.2	1211.6	594.6	0.00204876	1.2164e-06	0.00204754	1683.29	32.2616
105a	HU	2014	0.832	1194.1	617.2	1875	1007.8	1109.4	1203.1	786.6	844.1	898.3	920.5	934.6	944.2	954.3	971.8	981.5	999.3	1006.5	1032.7	632.6	1117.8	1132.7	1148.5	1168	1190.7	1214	591.6	0.00193261	9.58846e-06	0.00192302	200.556	23.0224
105a	HU	2014	0.792	1069.4	796.9	1875	1015.6	1109.4	1195.3	798.9	837.5	895.3	921	936.9	953	961.9	970.3	982.9	999.2	1027.4	1051	1068.7	1110.5	1125	1148.3	1168.8	1188.5	1202.4	1193.3	0.0028124	8.66023e-06	0.00280374	323.749	25.1021
105a	HU	2014	0.808	1085.2	820.3	1843.8	1023.4	1101.6	1179.7	817.2	854.6	886.8	905.9	933	939.8	953.5	970.1	986.5	994.7	1019.1	1028.3	1053.8	1084.5	1109.8	1130.7	1149.1	1167.2	1190.7	1150.9	0.00321734	6.47577e-06	0.00321086	495.827	26.9533
105a	HU	2014	0.808	1055.3	828.1	1835.9	1015.6	1093.8	1171.9	836.7	864.2	910.4	935.3	946.2	957.5	965.8	988.2	993	1007.1	1031.8	1051.2	1083.6	1099.7	1112.3	1131.8	1155.5	1169.9	1189.8	1159.9	0.00314949	1.37742e-05	0.00313572	227.652	23.5727
105a	HU	2014	0.776	1110.2	828.1	1875	1015.6	1093.8	1171.9	834.3	876.6	905.1	929	941	943.7	967.2	986.3	996.6	1010.6	1039.1	1073.3	1110.8	1122.6	1137	1144.1	1151.9	1162.6	1177.3	1140.9	0.00260654	3.07601e-06	0.00260346	846.375	29.2756
105a	HU	2014	0.744	1080.2	835.9	1851.6	1015.6	1085.9	1156.3	842.8	904	931.6	954.3	969.1	981.7	993.8	1007	1016.4	1039.6	1076.1	1090.6	1102.3	1106.8	1124.2	1135.1	1149	1155.4	1165.1	1128.5	0.00283854	1.16294e-05	0.00282691	243.083	23.8575
129a	HU	2013	0.728	884.9	726.6	1875	890.6	1453.1	1664.1	667.2	758.5	737.3	762.4	799.3	803.9	812.6	816.9	838	846.4	852.6	861.8	870.2	884.7	895.4	905.2	918.9	923.5	921.3	834	0.0015682	2.3462e-07	0.00156796	6683.01	38.2497
129a	HU	2013	0.704	896.9	757.8	1898.4	898.4	1375	1679.7	1349.9	779.7	777.8	797.2	823.3	835.2	841.4	848.7	854.2	856.9	860.5	869.2	886.4	902.6	903.5	912	927.2	935	921.9	870.3	0.00152253	2.02753e-06	0.0015205	749.926	28.7502
129a	HU	2013	0.688	879.1	718.8	1914.1	890.6	1273.4	1640.6	683.5	747.9	734.8	768.6	797.1	816.8	826.2	831.3	832.5	838.7	847.5	859.6	877.1	895.2	911.8	936	934.2	940.7	931	869.6	0.00171173	1.27818e-06	0.00171045	1338.19	31.2652
129a	HU	2013	0.656	973.3	804.7	1914.1	914.1	992.2	1671.9	828.5	853.9	825.9	829.7	854.4	867.8	874.1	891.5	901.2	906	915.6	926.2	930.6	940.1	952.4	958.1	980.5	987.6	974.5	890.7	0.00276975	2.19011e-07	0.00276953	12645.6	41.0194
129a	HU	2013	0.664	955.6	789.1	1921.9	906.3	984.4	1687.5	825.5	834.8	814.8	837.5	848.3	857.5	871.5	883.2	893	905.2	908.7	916.3	930.2	943.3	945	947.1	958.9	960.6	945.7	868.3	0.00254908	1.56781e-07	0.00254892	16257.9	42.1106
129a	HU	2013	0.656	975	820.3	1921.9	921.9	992.2	1687.5	816.1	872.4	838.3	854	867.8	883.3	900	905.5	911.4	921.2	929.9	943.8	957.2	959.4	961.9	967.3	977.6	986.8	984.9	871.6	0.00337838	7.66302e-07	0.00337762	4407.68	36.4421
129a	HU	2013	0.648	970.7	812.5	1914.1	914.1	992.2	1679.7	850.3	862.1	836.5	841.7	862.4	876.6	879.1	889.8	911.2	915.6	925.7	937.8	943.9	961.8	969.8	973.9	987.7	988.4	964.5	830.2	0.00307508	1.37105e-06	0.00307371	2241.86	33.5061
129a	HU	2013	0.624	973.3	820.3	1921.9	914.1	992.2	1695.3	840.8	866.1	847.5	858.8	873.3	883.1	898.4	908.9	929.5	934	944.3	945.6	953.8	959.7	973.4	976.6	987.8	982.1	963.6	903	0.00334224	4.21808e-07	0.00334182	7922.61	38.9887
129a	HU	2013	0.624	969.5	820.3	1921.9	914.1	984.4	1664.1	844.2	868.1	854.5	862.9	878.5	899.4	920.1	931.1	937.5	936.5	947.6	960.7	952.2	953	966.9	981	986.6	979.5	938.6	868.8	0.00325788	3.24845e-07	0.00325755	10028	40.0122
129a	HU	2013	0.632	976.6	828.1	1921.9	921.9	992.2	1664.1	793.4	876	848	855	864.2	882.7	903	914.4	932.7	938.9	943.9	950.2	971.8	994.6	992.2	998	996.3	994.6	987.1	963.7	0.00340737	2.01852e-07	0.00340717	16879.5	42.2736
129a	HU	2013	0.648	892.6	742.2	1875	898.4	1515.6	1687.5	734	762.3	757.5	761.4	796.5	820.3	832.8	836	843.6	850.5	864.7	867.3	881.6	883.8	896.3	905.5	914.4	920.2	917.5	837.3	0.00128786	2.29534e-07	0.00128763	5609.74	37.4894
129a	HU	2013	0.616	911.5	562.5	1921.9	921.9	1562.5	1726.6	740.5	1524.1	751.9	780.7	796	802.8	824.1	834.1	848.3	858.7	874.5	883	895.9	904	918	925.3	936.1	911.2	886.4	1423.2	0.00129032	1.85594e-07	0.00129013	6951.38	38.4207
129a	HU	2013	0.6	971.3	835.9	1921.9	937.5	1000	1593.8	815.6	888.2	872.9	880.6	894.7	911.7	919.9	931.5	938.5	944.8	949.2	960.6	979.2	985.2	997.2	1011.6	1017.3	1005.8	970.7	877	0.00313273	1.10025e-06	0.00313163	2846.29	34.5428
129a	HU	2013	0.632	974.2	812.5	1914.1	914.1	992.2	1679.7	846.4	859.4	831.3	846.6	864.1	875.1	894.4	908.1	917	925.2	932.9	941.6	946.5	963.9	975.2	978.7	981	981.8	956.9	875	0.00336341	5.68311e-07	0.00336285	5917.26	37.7212
129a	HU	2013	0.6	973.1	828.1	1914.1	921.9	984.4	1648.4	876	888.4	866.6	874.5	895.7	915.9	924.1	930.8	932.3	930.9	924.6	925	927.9	941.6	956.7	977.4	979.7	985.2	958	870.6	0.00286384	1.29794e-07	0.00286371	22063.4	43.4367
129a	HU	2013	0.656	935.1	765.6	1914.1	898.4	1273.4	1687.5	764.9	790.9	787.9	805.8	828.8	835.9	849.1	862.2	874.2	876.1	880.1	899.4	913.4	921.4	930.9	940.1	930.2	941.8	936.9	876.7	0.00182898	3.37881e-07	0.00182864	5412.08	37.3336
129a	HU	2013	0.632	963.3	812.5	1921.9	921.9	992.2	1703.1	834.6	843.6	830.7	831.3	852.9	864.5	871.8	887.1	896.6	913.9	928.9	934	940.9	955.1	960.7	971.8	969.1	961.6	948.8	871.1	0.00280651	0.00011372	0.00269279	23.6792	13.7437
129a	HU	2013	0.664	982.6	796.9	1914.1	921.9	1000	1671.9	675	846.7	828.9	818.5	837.6	850.9	868	881.6	905.1	912.2	913	916.1	933	942	972.5	974.7	986.1	975	901.7	985.4	0.00242983	2.9109e-07	0.00242954	8346.36	39.215
129a	HU	2013	0.608	973.5	820.3	1890.6	914.1	984.4	1687.5	846.7	857.4	841.3	853.3	859.5	877	896.9	906.9	910.9	907.5	916.4	927.8	942	955.6	964.7	974.6	982.1	981.4	964.8	904.2	0.00256838	1.25783e-07	0.00256826	20418.1	43.1002
129a	HU	2013	0.616	971	820.3	1914.1	921.9	992.2	1679.7	844.3	859.2	839.1	850.6	870.3	883.2	901.5	918.9	925.9	934.1	942.6	957.4	969.1	985.1	986.2	987.9	983.3	988.1	986.6	874.8	0.00325521	6.82971e-08	0.00325514	47661.5	46.7817
129a	HU	2013	0.592	971.2	843.8	1906.3	945.3	992.2	1531.3	878.3	907	898.6	899.2	925.2	938.7	955.8	971.2	987.9	993.1	996.4	1004.5	1003.5	999.8	994.1	988.5	979.9	977.5	972	870.2	0.00378491	3.26203e-07	0.00378459	11601.9	40.6453
129a	HU	2013	0.608	971.2	828.1	1921.9	929.7	992.2	1679.7	857.1	870.8	851.6	858.8	879.7	896.9	898.4	911.8	935.6	940.9	944.9	954.6	968.6	978.8	980.5	992.3	992.3	973	963	902.8	0.0034534	1.0679e-06	0.00345233	3232.84	35.0958
129a	HU	2013	0.624	965.2	828.1	1921.9	929.7	1000	1687.5	853	869.8	849.9	850.2	861	871.6	878.7	873.7	873.5	894.8	900.6	912.8	940.7	952.2	965.3	971.9	986.4	992.9	957.4	867.6	0.0029019	5.09071e-07	0.00290139	5699.39	37.5583
129a	HU	2013	0.592	967.2	812.5	1898.4	914.1	984.4	1671.9	824.9	854	828.3	836.3	853.3	865.9	877.9	890.5	889.2	901.1	911.3	926.2	937.1	952.6	971.9	976.4	977.7	972.2	962.1	867.8	0.00272298	5.55695e-08	0.00272292	49000.4	46.902
129a	HU	2013	0.608	963	820.3	1906.3	914.1	984.4	1671.9	846.9	860.2	835.9	837.9	876	893.9	908.4	914.5	926.6	940.3	937.1	954.1	962.3	969.1	978.1	979.9	972.2	967.8	957.4	870.2	0.00317399	1.94041e-07	0.00317379	16356.3	42.1368
129a	HU	2013	0.6	964	828.1	1890.6	921.9	992.2	1632.8	859.7	875.6	856.2	859.2	871.9	888.2	896.7	912.3	930.6	951.1	959.1	960.6	971.3	978.1	980.9	989.9	993.6	996.5	987.5	874.3	0.00339154	1.78516e-06	0.00338975	1898.85	32.7849
129a	HU	2013	0.592	963.7	835.9	1890.6	929.7	984.4	1609.4	876.9	881.3	868.7	874.8	889.5	898.3	916.4	923	942.2	958.3	960.3	968.2	966.4	968.5	981	987.9	995.6	986	960.8	869.6	0.00329303	9.21907e-08	0.00329294	35718.8	45.529
129a	HU	2013	0.6	963.3	835.9	1898.4	921.9	984.4	1656.3	865.6	879.7	854	859.6	871.6	898.1	911.9	920.1	927.8	947.2	951.3	950	957.9	969.4	980.6	979.4	978.5	984.4	970.4	861.4	0.00320895	5.0799e-08	0.0032089	63168.5	48.005
129a	HU	2013	0.592	964.2	828.1	1906.3	914.1	984.4	1664.1	851.2	862	844.6	857.3	874.5	891	890.3	894.4	904.4	906.5	913.1	948.2	958.5	974.6	976.6	984.9	983.9	982.5	968.3	870.2	0.00330764	2.63275e-07	0.00330738	12562.5	40.9907
129a	HU	2013	0.6	963.2	835.9	1906.3	929.7	984.4	1601.6	863.2	888.1	866.4	874	887.1	902.7	924.1	935.3	941.4	952.5	958.3	969.3	983.4	989.8	995.6	989	996.5	990.8	976.5	874	0.00338029	3.92052e-07	0.00337989	8621.04	39.3556
129a	HU	2013	0.592	963.2	835.9	1906.3	921.9	984.4	1648.4	866.2	879	858.9	862.8	882.1	898.7	915	926.7	940.8	935.1	940.8	952.1	967.2	980.4	986.1	991.9	984.8	976	969.4	874.9	0.00338427	7.37293e-07	0.00338353	4589.13	36.6173
129a	HU	2013	0.6	963.1	828.1	1914.1	921.9	984.4	1648.4	869.4	883.5	867.4	876.5	891.6	909.5	920.5	927	940.6	942.1	949.3	960.1	964.7	978.6	982.6	985.4	983.9	978.3	982.3	988.9	0.00336219	9.98692e-08	0.00336209	33664.9	45.2718
129a	HU	2013	0.592	964.2	820.3	1921.9	921.9	992.2	1687.5	852.8	865	836.5	843.1	866.6	880.6	898	912.2	922.7	925.1	933.8	947.3	951.4	970.4	989.4	985.5	988.7	997.1	972.5	864.6	0.00302215	1.24491e-07	0.00302203	24275	43.8516
129a	HU	2013	0.584	963.5	820.3	1921.9	929.7	992.2	1664.1	824	842.4	851.6	855	874.5	893.3	910.7	920.6	929.7	942.1	949.5	949.6	964.7	980	984.5	1007.4	1003.4	1005.5	975.8	941.6	0.00286202	7.71023e-08	0.00286195	37118.8	45.6959
129a	HU	2013	0.6	963	828.1	1921.9	929.7	992.2	1695.3	865.1	879.5	857.9	867.4	876.5	890.9	894.9	906.5	916.9	934.6	935.5	946.6	954.4	977.5	998.4	1006.4	993.2	985.2	929.9	868.5	0.00295166	1.43664e-07	0.00295152	20544.6	43.127
129a	HU	2013	0.608	963.3	812.5	1921.9	921.9	992.2	1671.9	820.1	857.2	829.2	834.2	854.5	869.6	879.2	885.1	878.5	893.6	908	934.3	942.1	950.1	967.6	982	986.7	989.6	931.1	871.2	0.00302251	2.9153e-07	0.00302221	10366.7	40.1564
129a	HU	2013	0.584	957.3	828.1	1921.9	921.9	992.2	1632.8	861.4	877.4	862.6	865.2	884.4	901	929.1	932.7	949.8	957.6	957.7	971.7	991.7	992.3	996.3	997.1	992.9	998.6	983.5	886.3	0.003724	8.92004e-08	0.00372391	41747.7	46.2063
129a	HU	2013	0.616	957.5	804.7	1921.9	914.1	992.2	1679.7	820.8	842.2	824.1	836.8	859.1	872.7	881.3	886.3	896.4	906	926.9	947.8	965.5	964.1	977.2	975.2	981.1	977.6	960.6	890.7	0.00315248	5.48347e-07	0.00315193	5748.06	37.5952
129a	HU	2013	0.6	976	812.5	1914.1	921.9	1000	1671.9	842.6	830.6	828.8	849.2	862.2	871.9	872.1	870.4	870.4	888.8	892	915.8	932.7	953	980.3	988.6	1004.4	1000	974.9	870.5	0.00276645	3.8183e-07	0.00276607	7244.23	38.5999
129a	HU	2013	0.64	876	773.4	1890.6	882.8	1187.5	1679.7	770.1	817.9	799.8	821.1	841.3	858.5	867	867.3	867.2	869.1	870.1	863.7	871.3	887.8	894.6	909.6	919.1	925.4	926.7	862.6	0.0018374	3.50666e-07	0.00183705	5238.74	37.1923
129a	HU	2013	0.648	876.8	710.9	1867.2	882.8	1437.5	1648.4	719	749.1	740	749.9	773.5	792.9	802.1	802.2	805.7	820.9	829.8	835.6	855.2	861.1	866.3	892.7	908.6	916.6	910.7	867.5	0.00130563	1.02848e-07	0.00130553	12693.8	41.0359
130a	HU	2013	0.488	1054.5	890.6	1195.3	976.6	1039.1	1093.8	910.8	939.3	940	974.4	1004.9	940.5	1026	1032.1	1023.9	1023	1030.5	1041.6	1054	1058.7	1058.6	1055.5	1043.5	1036.8	1037	1082.8	2.66387e-05	1.33855e-07	2.65049e-05	198.012	22.9669
130a	HU	2013	0.384	977.2	898.4	1867.2	968.8	1015.6	1085.9	880.4	922.3	938.2	945.6	974.4	975.4	986.2	998.8	1002.6	1009.2	1022.3	1025.2	1022.4	1020	1019.2	1020.8	1029.9	1035.5	1042.6	936.2	1.23837e-05	5.49075e-08	1.23288e-05	224.538	23.5129
130a	HU	2013	0.368	982.8	906.3	1859.4	960.9	1000	1070.3	931.1	944.6	955.8	982.6	985.9	978.7	976.7	989.1	1003.6	1008.1	1014.5	1020.6	1025.2	1020.3	1010.5	1015	1010.7	1002.7	1008.1	931.5	1.04838e-05	1.39882e-07	1.03439e-05	73.9473	18.6892
130a	HU	2013	0.52	1037.8	914.1	1281.3	976.6	1046.9	1132.8	903.4	942.1	955.8	953.9	1017.9	1019.2	1029.4	1040.1	1047.2	1042.3	1040.4	1039.4	1047.1	1043.1	1046.1	1042.7	1039.4	1025.8	1030.4	1096.7	1.47572e-05	1.21234e-07	1.4636e-05	120.725	20.818
130a	HU	2013	0.496	963.5	898.4	1859.4	953.1	984.4	1015.6	929.3	916.7	926.1	943.6	964.1	955.8	959.5	953.9	963.2	971.7	984.1	991.2	999.2	1006.1	1001	991.6	980.2	959.2	956.4	977.6	2.16987e-05	1.74851e-07	2.15238e-05	123.098	20.9025
130a	HU	2013	0.52	1034.3	890.6	1859.4	968.8	1031.3	1109.4	938.8	913.1	915.1	973.9	980.6	1012.9	1019.1	1019.5	1017.6	1021.6	1025.7	1031.3	1036.4	1042.7	1039.1	1040.8	1037.7	1031.4	1039.9	1101	1.64824e-05	2.60044e-08	1.64564e-05	632.833	28.0129
130a	HU	2013	0.504	1056	539.1	1843.8	953.1	1039.1	1078.1	917.3	907.2	926.9	543	1008.5	1017.4	1018.3	1026.4	1040.8	1047.5	1048.3	1051.5	1050.9	1058.9	1053.1	1061.6	1061.7	1051.1	1054.5	1058.6	2.09016e-05	8.09422e-08	2.08206e-05	257.228	24.1032
130a	HU	2013	0.504	1073	898.4	1164.1	976.6	1054.7	1101.6	941.3	952.4	948.3	932.3	1046.1	1054.5	1058.9	1067.4	1075.6	1076	1078.7	1078.8	1084.8	1084.2	1083.5	1085.1	1082.2	1063.7	1059.6	1066.9	2.82095e-05	2.11706e-08	2.81883e-05	1331.49	31.2434
130a	HU	2013	0.52	1070.7	906.3	1148.4	984.4	1054.7	1093.8	961.5	1040.8	1042.6	1046.9	1049.7	1050.9	527.7	523.8	525	1064.7	1068.1	1073.8	1081.6	1079.4	1078	1068.3	1064.5	1050.3	1040.2	1063.3	2.34563e-05	2.25264e-08	2.34338e-05	1040.28	30.1715
130a	HU	2013	0.496	1077.1	929.7	1156.3	1031.3	1070.3	1101.6	1043.8	1032.2	1031.1	1029.4	1026.8	1030.7	1035.5	1040.3	1052.3	1060.1	1065.2	1066.4	1084.1	1087.1	1095.4	1084.6	1067.8	1055.7	1049.6	1048.6	2.36219e-05	7.60136e-08	2.35459e-05	309.759	24.9102
130a	HU	2013	0.528	1051.2	914.1	1164.1	992.2	1046.9	1085.9	907.3	972.3	984.4	1027.5	1033.9	1034	969	1047.1	1047.1	1046.8	1052.6	1052.3	1052.1	1058.9	1062.4	1056.6	1039.9	1030	1038.6	1073.7	4.4387e-05	3.51029e-08	4.43519e-05	1263.48	31.0157
130a	HU	2013	0.504	1063.5	906.3	1156.3	984.4	1054.7	1101.6	910.2	946.6	948.5	1023.1	1037.7	1051.4	1051.2	1050.3	1060.3	1066	1072.1	1074.5	1075.4	1073.6	1065.4	1064.2	1068.6	1059.7	1061.3	1089.3	4.11864e-05	2.43797e-08	4.1162e-05	1688.37	32.2747
130a	HU	2013	0.504	1062.7	906.3	1171.9	992.2	1054.7	1093.8	900.4	954	965.1	996.6	1035.5	965.8	955	1047.8	1060.4	1064.3	1067.1	1072.3	1071.6	1071.9	1069.5	1061.8	1047.8	1032.3	1028.6	1067.9	3.92187e-05	2.94177e-08	3.91893e-05	1332.17	31.2456
130a	HU	2013	0.496	1087	929.7	1164.1	1039.1	1078.1	1109.4	1038.9	1035.6	1044.3	1050.3	1056.8	1057.1	1064.7	1060.3	1058.1	1066.7	1075.2	1083.1	1091.1	1098.2	1093.2	1089.9	1061.8	1057.3	1068.9	1080.7	4.60993e-05	7.70704e-08	4.60223e-05	597.145	27.7608
130a	HU	2013	0.512	1078.5	914.1	1156.3	1000	1054.7	1101.6	907.1	993.2	987.8	1004.7	1036.5	1040.8	1049.2	1053	1056.6	1067.6	1064.5	1066.9	1087.1	1080.6	1055	1052.2	1049.5	1046.9	1054.5	1077.1	3.23488e-05	4.12061e-08	3.23076e-05	784.049	28.9434
130a	HU	2013	0.48	1060.9	921.9	1132.8	1015.6	1062.5	1085.9	1054.9	1048.8	1042.7	1052.1	1051.1	1056	1060.9	1060.9	1066.7	1066.7	1069	1070.6	1065.3	1067.5	1065.3	1063.4	1056.3	1046.6	1038.3	1058.3	4.17333e-05	3.51062e-08	4.16982e-05	1187.77	30.7473
130a	HU	2013	0.496	1056.5	914.1	1164.1	984.4	1046.9	1085.9	910.1	969.7	965.1	1027.1	962.5	964.9	1045.2	1051.1	1061.6	1063.6	1060.4	1069.8	1069.8	1069.6	1061.3	1053.2	1043.9	1037.4	1045.2	1065	3.04254e-05	4.98695e-08	3.03756e-05	609.101	27.8469
130a	HU	2013	0.496	1067.6	914.1	1117.2	1000	1046.9	1085.9	908.4	1011.9	1012.7	1033.2	953.3	1055.2	1058.1	1057.7	1057.1	1062.7	1061.9	1070.7	1075.1	1079.5	1074	1064.1	1050.1	1029.3	1033.3	1057.2	2.51107e-05	1.47154e-07	2.49636e-05	169.642	22.2953
130a	HU	2013	0.48	1073.8	921.9	1125	1031.3	1070.3	1101.6	1052.1	1060.7	1059.8	1062.6	1068.5	1083.7	1086.6	1086.5	1087	1087.9	1088.7	1088.3	1086.1	1083.4	1079.2	1062.6	1056.7	1048.2	1041.7	1059.7	3.23996e-05	9.56494e-08	3.23039e-05	337.733	25.2857
130a	HU	2013	0.52	1051.7	914.1	1164.1	968.8	1039.1	1085.9	910.3	964	935.6	1002.8	958.2	959.1	1031.2	1025.3	1027.2	950.5	1053.1	1062.4	1060.9	1058.4	1058.7	1052.9	1044	1033.4	1042.1	1085.4	2.03081e-05	3.37581e-08	2.02743e-05	600.577	27.7857
130a	HU	2013	0.504	1066.3	921.9	1156.3	1015.6	1062.5	1101.6	992.8	1002.1	1016.4	1028.6	1049.9	996.7	1060.3	1064.8	1068.6	1070.6	1074.3	1072.9	1070	1094.6	1090.9	1095.6	1078	1046.5	1041.6	1104.8	3.81119e-05	4.23226e-08	3.80695e-05	899.509	29.5401
130a	HU	2013	0.512	1062.7	921.9	1195.3	1000	1054.7	1093.8	921.6	984.7	991.1	1020.9	1042.5	1052	1054.2	1056.8	1069.8	1064.8	1067.1	1071.7	1075.1	1075	1070.6	1068.2	1055.9	1035.8	1040.5	1037.3	3.29725e-05	4.45724e-08	3.2928e-05	738.753	28.685
134a	HU	2013	0.64	964.8	742.2	1898.4	914.1	984.4	1632.8	745.9	777.9	847.6	866.5	877.7	898.6	907.5	924.3	927.8	937.9	951.9	950.6	960	967.3	980.1	974.8	971.4	953.7	948.3	944.4	0.000270578	1.46672e-06	0.000269111	183.478	22.6358
134a	HU	2013	0.592	988.6	835.9	1890.6	937.5	992.2	1546.9	864.1	868.5	892.1	908.4	921.2	933.6	955.5	967.6	987.3	992.8	996	997.9	995.9	995.9	985.9	978.2	970.9	949.5	942	920.1	0.000329196	6.22952e-08	0.000329134	5283.46	37.2292
134a	HU	2013	0.608	954.1	820.3	1890.6	921.9	976.6	1437.5	845.7	862.8	883.1	896.5	913.7	920.4	935.4	945.3	956.8	959	960.9	973.3	975.2	981.3	975.1	970	965.9	949.1	944.2	960.8	0.000599895	8.97166e-08	0.000599806	6685.56	38.2514
134a	HU	2013	0.624	953.4	812.5	1882.8	914.1	968.8	1421.9	835.5	856.1	878.2	894.6	915.5	927.6	940.9	947.3	955.4	972.6	976.4	976.6	979.7	982.4	982.7	976.1	966.3	960	946.7	978.2	0.000518497	5.74773e-07	0.000517922	901.09	29.5477
134a	HU	2013	0.624	953.2	812.5	1875	914.1	968.8	1445.3	842.7	863.6	880.3	895.1	914.4	933.5	944.6	954.1	957.3	968.3	974.7	979.5	983.3	978.4	976.2	975.1	969.9	956.9	952.7	952.8	0.000526677	1.15661e-07	0.000526561	4552.62	36.5826
134a	HU	2013	0.592	967.2	804.7	1898.4	921.9	976.6	1453.1	826.7	843.3	873.8	892.4	906.4	919.4	920.6	938.9	951	958	969.2	988	989	974.5	977.3	974.4	959.8	944.1	935.4	952	0.000332203	6.56878e-08	0.000332138	5056.31	37.0383
134a	HU	2013	0.6	954.7	835.9	1882.8	929.7	984.4	1539.1	854.2	871	892.4	908.8	923.7	934	953	969.7	980.3	989.5	992.5	995.4	993.4	990.2	986.8	978.6	967.2	951.9	935.7	925	0.000483916	1.15001e-07	0.0004838	4206.94	36.2397
134a	HU	2013	0.6	968.2	859.4	1890.6	929.7	984.4	1445.3	876.9	883.1	892.9	911.1	929.2	944.7	967.6	980.8	984.7	989.4	989.3	996.9	992.8	991.5	984.8	975.2	967.3	949.7	934.8	927.6	0.000513322	2.85178e-07	0.000513037	1799.01	32.5503
134a	HU	2013	0.568	969.3	851.6	1882.8	937.5	984.4	1343.8	885.6	899.9	906.6	933	954.9	973.6	982.8	991.5	993	999.4	1003.8	1003.5	1002.6	994.3	993.8	987.6	971	944.1	936.1	946.8	0.000507811	6.22814e-07	0.000507188	814.349	29.1081
134a	HU	2013	0.584	960.7	851.6	1890.6	929.7	984.4	1484.4	878.9	874	896.3	911.4	930.9	953	967	975.3	980.1	985.1	989.1	987.4	989.2	983.2	981.5	970.9	961.9	936.7	932	907.7	0.000477223	9.22715e-08	0.00047713	5170.94	37.1357
134a	HU	2013	0.608	952.6	796.9	1906.3	914.1	968.8	1476.6	761.1	841.5	879.4	884.5	912.3	926.6	933.4	942.9	950.7	954.7	977.2	985.6	984.9	984.1	983.6	977.2	972.4	951	942.2	915.9	0.000628131	1.10531e-07	0.00062802	5681.85	37.5449
134a	HU	2013	0.608	946.2	812.5	1906.3	921.9	976.6	1445.3	878.5	861.7	882.8	908.3	919	930.3	942.7	956.9	975.1	983.4	988.3	991.8	991.6	989.7	985.5	975.3	976	959	947.8	928	0.000574184	1.04122e-06	0.000573143	550.452	27.4072
134a	HU	2013	0.608	946	765.6	1898.4	921.9	976.6	1476.6	843.1	859.2	881.7	898.8	914	928.6	946	962.8	971.2	969.3	979	986.7	990.6	993.6	986.6	980.4	972.1	944.6	941.8	863.7	0.000553938	1.23573e-07	0.000553815	4481.68	36.5144
134a	HU	2013	0.776	946.1	820.3	1906.3	929.7	992.2	1632.8	937.7	1122.7	1680.2	847.4	875.2	861.9	838.5	916.6	942.8	957.9	976.5	983.3	986.7	994	994.2	989.6	974.5	966.2	939.7	911.3	0.000620729	2.43828e-07	0.000620485	2544.77	34.0565
134a	HU	2013	0.6	946	835.9	1914.1	921.9	976.6	1492.2	869.4	867.5	883.5	899.2	918.2	931.3	944.5	954.8	970.8	981.2	984	983.9	984.6	986.3	977.6	973	974.4	957.2	946.8	958.2	0.000543666	2.24363e-07	0.000543441	2422.15	33.842
134a	HU	2013	0.584	968.1	820.3	1882.8	921.9	976.6	1164.1	849.5	866.8	889.9	899.1	920.6	933.4	965.3	973.9	987	986	989.9	993.8	996.7	996.9	994.8	989.3	980.5	957.3	955.5	953.8	0.00052111	1.10352e-06	0.000520007	471.226	26.7323
134a	HU	2013	0.624	946.2	554.7	1882.8	906.3	960.9	1343.8	523.3	566.1	863.7	870.9	889.3	894.2	916.8	924.3	944.9	957.8	961.7	971.3	970.3	976.7	978.6	974.7	968.6	933.4	926.5	929.9	0.000529473	2.49938e-06	0.000526973	210.841	23.2396
134a	HU	2013	0.608	945.6	804.7	1906.3	914.1	968.8	1476.6	850.2	855.4	882.5	896.7	918.1	928.6	946.5	964.8	969	978.3	979.5	984.2	978.8	980.1	980.9	973	965.8	947.5	945.6	928.6	0.000499167	4.19966e-05	0.000457171	10.8859	10.3686
134a	HU	2013	0.808	562.2	500	1890.6	867.2	976.6	1609.4	559.6	564.4	823.5	534.7	544.5	888.2	884.3	905	873.7	957.9	969.4	984	988.8	987.4	989.2	990.2	983.3	963.7	944.4	883.3	0.000691772	3.87732e-05	0.000652998	16.8415	12.2638
134a	HU	2013	0.616	952.7	804.7	1898.4	914.1	968.8	1453.1	825.6	851.5	880	886.4	911.9	929.4	937.8	943.5	954.6	969.6	974.5	983.3	979.2	980.5	980.8	972.2	964	957.2	935.8	928.8	0.000561415	5.8757e-07	0.000560827	954.486	29.7977
134a	HU	2013	0.584	960	820.3	1882.8	921.9	976.6	1312.5	852.1	869.9	892.9	901.6	920.2	933.4	961.9	960.3	991.6	991.1	992.6	991.7	987.5	992.7	989.6	982.8	973.2	952.2	951.9	974.3	0.000393841	3.42046e-06	0.00039042	114.143	20.5745
134a	HU	2013	0.592	962.3	835.9	1859.4	929.7	976.6	1148.4	860.1	869.7	904.3	915.8	939.9	958.5	977.3	985.8	990.4	995.5	995.3	985.7	986.2	982.3	980.3	972.4	950.4	951.8	949.6	996.7	0.000661703	4.73537e-07	0.00066123	1396.36	31.45
134a	HU	2013	0.592	960.3	828.1	1898.4	929.7	976.6	1343.8	861	882.8	888.5	913.2	932.2	949.2	965.1	976.7	984.2	985.9	990.2	991.9	993.7	987.5	983.8	975	961.9	954.5	938.2	958.8	0.000700141	6.1579e-07	0.000699525	1135.98	30.5537
134a	HU	2013	0.616	946.2	804.7	1906.3	914.1	968.8	1476.6	757.4	852.9	878.2	885.9	908.6	931.7	944.7	955.6	960	967.3	970	977.7	978.5	973	972.1	971.9	963.8	951.2	934.3	953.9	0.000718416	1.39331e-07	0.000718277	5155.18	37.1224
134a	HU	2013	0.608	952.7	835.9	1898.4	921.9	968.8	1429.7	864.9	866.2	887.1	901.8	913.3	938.4	950.5	961	967.4	972.9	976.8	981.9	985.2	984.2	979.4	976.2	962.4	954.4	936.4	962.1	0.000708182	1.69547e-07	0.000708013	4175.91	36.2075
137b	HU	2014	0.8	997	500	1843.8	726.6	960.9	1093.8	791.6	858.9	797.7	673.7	903.9	913.4	862.4	932.1	943.3	617.9	603.2	957.3	532.1	537.4	967.8	976.4	991.2	1031.3	509.6	509.3	0.000184785	1.47205e-05	0.000170064	11.5528	10.6269
137b	HU	2014	0.816	1009.6	664.1	1945.3	1000	1335.9	1703.1	735.6	836.6	848.9	902.4	916.2	933.8	941.8	951.6	956.2	893.9	965.3	974.4	979	601.7	990.8	997.2	1005.3	1494.3	1464.5	1239.4	0.000251651	1.87161e-06	0.000249779	133.457	21.2534
137b	HU	2014	0.672	1139.5	781.3	1851.6	968.8	1140.6	1484.4	751.5	808	805.7	841	852.2	875.9	892.7	904.3	934.4	944.5	939.4	938.6	956.5	978.4	987.7	1140.3	1149.4	1127.5	1452.6	1455.2	0.000574673	2.30309e-06	0.00057237	248.523	23.9537
137b	HU	2014	0.84	992.4	812.5	1875	984.4	1046.9	1585.9	1271.5	824.8	853.2	892.9	918.2	926.6	941.1	948.8	960.4	968.6	976.5	981.3	991.5	992.7	1000.1	1006	1005.1	1489.1	1001.5	1000	0.000626552	1.02158e-05	0.000616336	60.3315	17.8054
137b	HU	2014	0.824	979.3	882.8	1921.9	984.4	1078.1	1562.5	762.9	860.3	853.8	922.2	933.2	941.9	947.5	958.9	964.9	971.1	978.6	981.1	986.1	993	996.3	1007.4	1032.2	1632.5	1274.1	1001.2	0.000252519	3.75503e-06	0.000248764	66.2482	18.2117
137b	HU	2014	0.792	955.4	750	1937.5	953.1	1132.8	1640.6	570.8	780.9	812.6	839.2	871.6	897.8	914.2	926.8	940.5	951.2	955.9	961.7	967.3	970.6	978.3	984.7	529.1	1521.4	1478	1473.7	0.000632465	1.42169e-05	0.000618248	43.4868	16.3836
137b	HU	2014	0.848	985.9	812.5	1914.1	984.4	1093.8	1539.1	1281.5	778.4	880.9	908	924.7	934.6	946.1	957.3	966.1	971.9	983.6	989.7	991.8	1001.8	1009.6	1015	1015	1557.2	1396.7	513	0.000502973	8.58557e-06	0.000494387	57.5835	17.603
137b	HU	2014	0.776	1005.5	804.7	1906.3	992.2	1117.2	1539.1	814.4	853.8	863.5	921.9	928	934.2	947	954.3	961.1	968.5	978.3	982	993	998.7	1003.3	1007.5	1020.8	1124.3	1440	1284.2	8.13011e-05	3.76842e-06	7.75326e-05	20.5743	13.1333
137b	HU	2014	0.92	921.2	515.6	1929.7	914.1	1351.6	1656.3	561	659	722.7	732.3	753.8	785.1	798.5	793.2	845.3	867.7	880.4	894.9	906.1	919.1	923.7	932.4	970.7	1473	537.5	553.6	0.000317005	7.23078e-06	0.000309774	42.8411	16.3186
137b	HU	2014	0.76	1015.5	789.1	1906.3	960.9	1046.9	1578.1	792.9	824.6	851.6	887.2	906	919	931.8	940.8	951.9	957.9	960.4	967.4	975.6	979.2	986.4	995.5	1005.6	1032.6	1567.6	1021	0.000118576	3.91103e-06	0.000114665	29.3184	14.6714
137b	HU	2014	0.736	1017.5	757.8	1851.6	914.1	1015.6	1414.1	780	814.6	837.8	871.7	898.1	913.8	936.1	944.5	952.2	555.9	555	972	973.4	977.9	985.4	989.8	996.4	1005.3	1029.1	1421.7	0.000458749	4.94917e-06	0.0004538	91.6922	19.6233
137b	HU	2014	0.712	1022.3	828.1	1867.2	992.2	1046.9	1507.8	829.4	848.4	883.4	909.3	918.9	935.9	945.1	952.9	958.6	965.1	971.6	978.6	987	987.2	993.7	1005.4	1007.6	1020.5	1047	1317.3	0.000184745	4.61519e-06	0.000180129	39.0296	15.9139
137b	HU	2014	0.784	1025.5	820.3	1929.7	1007.8	1085.9	1617.2	593.2	834.5	839	837.9	905.8	917.8	936	948.5	957.6	965.1	971.4	534.8	992.4	997.4	1003	1006.6	1014	1063.7	1481	1346.2	0.000329431	1.1107e-06	0.00032832	295.597	24.707
137b	HU	2014	0.688	1038.1	921.9	1890.6	1031.3	1093.8	1453.1	865.4	888.9	915.6	934.5	953.7	961	966.5	971.2	977.5	987.6	992.2	1003.2	1004.1	1008.9	1017.5	1023.5	1034.8	1065.4	1514.5	1263.5	0.000726635	1.31839e-06	0.000725316	550.152	27.4048
137b	HU	2014	0.68	1007.4	843.8	1906.3	1007.8	1078.1	1523.4	841.8	876	883.3	927.1	938.8	945.8	952.9	967.3	971.9	980.7	988.9	993.9	994.4	999.7	1004.5	1007.9	1002.4	1034.9	1014.5	1310.9	0.000410366	1.17363e-06	0.000409192	348.656	25.424
137b	HU	2014	0.544	1036.3	945.3	1437.5	1031.3	1062.5	1187.5	944.3	957.2	961.1	964.4	975.9	982.6	991	995.7	998.2	1006.4	1011	1014.6	1018.5	1020.3	1023	1028.3	1040.5	1057.2	581.5	1427.2	0.000539929	1.67108e-06	0.000538258	322.102	25.0799
137b	HU	2014	0.704	1033.8	851.6	1898.4	1015.6	1085.9	1429.7	856.4	882.8	909.3	928.8	939.2	953.9	962.1	970.2	978.1	989.9	992.1	998	1007.2	1014.2	1018.9	1021.9	1036.5	1052.5	553.2	1415.9	0.000792284	2.40456e-06	0.00078988	328.492	25.1652
137b	HU	2014	0.544	1028.3	929.7	1906.3	1015.6	1062.5	1312.5	937	940.6	949.2	954.7	969.1	978.3	984.1	991.5	995.6	998	1000.7	1009.4	1014.7	1021	1023.7	1028.9	1043.4	561.9	1058	1304.4	0.000626026	3.17745e-06	0.000622848	196.021	22.923
137b	HU	2014	0.704	1037.1	851.6	1875	1015.6	1078.1	1445.3	813.6	885.1	907.5	922.5	943.4	951.3	957.6	963.9	975.5	981.5	993.9	998.4	1002.7	1007.1	1011.1	1019.5	1030.1	1064.3	1497.9	1284.3	0.000405369	3.26829e-06	0.000402101	123.031	20.9001
137b	HU	2014	0.68	1037.1	882.8	1898.4	1031.3	1078.1	1421.9	810.4	898	910	937.1	947.5	964.4	969.1	979.8	987.7	997.9	1003.2	1010.6	1017.2	1021.4	1026.7	1032.1	1037.9	1054.8	538.6	1438.9	0.000814316	1.48519e-06	0.000812831	547.293	27.3822
137b	HU	2014	0.6	1043.9	890.6	1898.4	1031.3	1078.1	1218.8	879.9	902.7	927.4	941.5	948.2	960.2	968.7	550.4	987.8	989.3	996.7	1005.6	1005.3	1013.4	1022.9	1030	1034.5	1041.2	1062.4	1099.1	0.000664081	1.84579e-06	0.000662236	358.782	25.5483
137b	HU	2014	0.632	1043	875	1882.8	1023.4	1070.3	1343.8	880	902	921.6	942.2	953.2	961.6	969.6	984.4	992	996.4	1001.1	1013	1018.5	1022.6	1025.7	1028.2	1037	1057	1076	1487.5	0.000547675	2.22946e-06	0.000545446	244.654	23.8855
156b	HU	2014	0.696	751.8	500	1609.4	687.5	820.3	1312.5	998.5	508.5	533.2	540.7	566.9	582.8	607.2	630.5	651.1	673.9	690.7	701.1	713	717.9	726.4	735.6	749.4	763.3	791.2	1146.1	4.25875e-05	1.95126e-06	4.06362e-05	20.8257	13.186
156b	HU	2014	0.776	760.1	507.8	1742.2	757.8	1093.8	1453.1	978	990.2	509.2	520.8	548.2	568.3	606.4	625.8	649.4	674.6	705.5	723.8	731.2	744	754.8	760.1	773.6	778.7	805.3	610.6	0.000137875	7.78896e-06	0.000130086	16.7013	12.2275
156b	HU	2014	0.816	774.7	515.6	1882.8	820.3	1187.5	1500	990	1009.7	529.2	555.2	569.8	586.8	614.4	660	697.8	710.9	719.6	727.8	731.7	732.7	734.6	745.3	753.3	777.4	809.8	1097.1	0.000248891	3.02185e-05	0.000218673	7.2364	8.59523
156b	HU	2014	0.792	781	515.6	1867.2	820.3	1203.1	1492.2	967	1012.4	547.2	560.8	582.4	613.2	633.6	661.2	698.8	713.4	733.4	750.7	756.1	762.5	764	765.5	774.1	796.4	824.1	1093.2	0.000257706	2.21551e-05	0.000235551	10.6319	10.2661
156b	HU	2014	0.8	781.6	515.6	1875	820.3	1218.8	1500	938.5	984.9	528.2	561.1	595	610.2	645.1	671.6	694.3	715.5	733	741.7	748	761.9	767.4	775.1	786	800.5	817	1094.5	0.000265609	2.35263e-05	0.000242083	10.2899	10.1241
156b	HU	2014	0.816	788.3	515.6	1906.3	820.3	1195.3	1492.2	960.5	518	538.9	559.7	583.2	609.6	632.7	673.4	694.6	722	732.6	743.1	750.8	754.5	760.6	763.6	773	800.8	806.7	1097.9	0.000249186	2.73291e-05	0.000221857	8.11796	9.09447
156b	HU	2014	0.84	818.1	523.4	1890.6	828.1	1234.4	1539.1	947.2	999.3	546.5	574.2	618.9	641.2	675.8	698.5	725.3	740.6	753	767	776.1	785.5	794.3	801.1	820.4	833.7	1103.2	517.1	0.000364535	2.94637e-05	0.000335072	11.3724	10.5585
156b	HU	2014	0.848	821.3	523.4	1812.5	851.6	1164.1	1539.1	963.3	989.5	544.5	585.3	629.9	674.6	700.9	728.5	744.8	764.7	764	773.6	784.3	788.2	793.3	807	827.4	863.4	928.1	1340.1	0.000490057	4.3394e-05	0.000446664	10.2932	10.1255
156b	HU	2014	0.776	779.7	507.8	1898.4	804.7	1140.6	1460.9	952.6	982.5	516.6	513.6	548.1	565.8	599.9	622.5	651.4	679.3	717.8	738.4	747.7	748.7	758	766.2	777	800.8	1065.6	1084.6	0.000177296	1.264e-05	0.000164656	13.0266	11.1483
156b	HU	2014	0.92	994.6	523.4	1796.9	843.8	1101.6	1507.8	600.1	649.3	642.9	1012	548.8	585.5	591	637.1	675.2	709	738.3	753.4	764.8	785.1	798.2	802.3	820.3	863.5	829.8	1139.9	0.000325401	2.30968e-05	0.000302304	13.0886	11.1689
156b	HU	2014	0.824	1516.4	515.6	1890.6	820.3	1226.6	1500	516.2	515.6	536.8	550.5	561.8	579.9	611.9	634.1	655.3	688.8	708.3	718.2	726.7	735.6	734.3	755.5	768.3	761.7	832.7	955.9	0.000295526	1.93892e-05	0.000276136	14.2417	11.5356
156b	HU	2014	0.84	810.9	523.4	1851.6	835.9	1195.3	1523.4	986.4	1000.9	553.6	576	601.9	641.3	675	696.1	716	739.8	743.7	756.2	771.3	776.3	782.8	794.7	812.7	823.5	981.4	1190.2	0.0004666	3.82614e-05	0.000428339	11.1951	10.4903
156b	HU	2014	0.84	1510.7	523.4	1882.8	820.3	1242.2	1507.8	522.8	533.1	560.2	595.7	610	643.2	673.2	698.3	718.1	733.4	753.9	757.7	760.4	768.4	772.4	784.5	830.1	1070.1	1336.7	558.9	0.000355295	1.93846e-05	0.000335911	17.3287	12.3877
156b	HU	2014	0.776	1511.3	507.8	1890.6	812.5	1210.9	1476.6	958.6	1010	524.4	539.5	556.2	587.7	609.7	636.1	657.2	682.4	698.7	707.4	716.9	730.4	739.1	746.1	752.2	761.9	808.1	583.9	0.00025342	2.20295e-05	0.000231391	10.5037	10.2134
156b	HU	2014	0.864	834.1	515.6	1710.9	750	859.4	1296.9	1293.3	711.2	960	545	565.2	590.7	635.3	662.8	695.7	721.4	736.4	743.6	751.7	762.7	770.5	783.9	805.6	833.3	861.2	1164.3	2.35098e-05	4.35664e-06	1.91531e-05	4.39631	6.43088
156b	HU	2014	0.824	831.6	515.6	1718.8	765.6	882.8	1343.8	944.2	965.6	530	570.2	607	631.1	658.5	694.6	721.7	737.5	745.4	758.5	790.7	805.7	807.3	807.9	824.7	834.5	1069.2	1156.4	6.49833e-05	6.05123e-06	5.89321e-05	9.73887	9.88508
156b	HU	2014	1.296	843.9	515.6	1882.8	804.7	992.2	1414.1	743.8	740.8	605.9	1248.9	592.6	627.1	691.6	727.8	759.6	762.2	779.1	792.2	806.4	828.7	1077.4	562.6	547.6	1412.4	1468.5	588.8	0.000103746	3.30834e-05	7.0663e-05	2.13591	3.29583
156b	HU	2014	0.784	813.9	507.8	1718.8	773.4	968.8	1414.1	961.3	993.2	560.1	594.1	616.4	644.6	689.7	722.1	731.5	746.1	757.6	768.4	768.2	773.7	779.8	789.1	795.5	835.2	941.9	1127.6	6.22761e-05	4.84046e-06	5.74356e-05	11.8657	10.7429
156b	HU	2014	0.824	849.2	515.6	1742.2	796.9	1007.8	1429.7	947.4	993.7	562.8	596.6	625.5	657.7	682.6	648.2	733.9	749.8	762.4	774.8	771.5	778.5	788.8	806.1	840.6	875.1	830.7	527.6	8.95626e-05	6.54669e-06	8.30159e-05	12.6806	11.0314
156b	HU	2014	0.792	838	515.6	1726.6	796.9	1023.4	1429.7	935.3	518.7	561.5	591.1	614.8	652.7	690.9	714.5	735.9	749.2	772.8	785.1	794.7	800.5	814.9	833.2	841.3	845.8	847.2	555.3	9.83784e-05	5.72712e-06	9.26512e-05	16.1776	12.0891
156b	HU	2014	0.744	846.1	515.6	1742.2	804.7	1023.4	1476.6	524.6	561.2	595.4	633.8	676.7	707.6	729.7	748.6	764.3	778.1	784	787.4	795.2	803.1	812.2	830	837.4	849	1071.3	947.5	0.000131144	6.10486e-06	0.000125039	20.4819	13.1137
156b	HU	2014	0.952	810.8	515.6	1687.5	789.1	1000	1476.6	614.4	611.9	962.3	532.7	595.2	635.6	691.5	715.7	749.8	766.4	779.5	785.4	792.9	798.1	800.1	803.6	825.3	1235.4	679.8	682.6	0.00012226	6.9183e-06	0.000115341	16.6719	12.2199
156b	HU	2014	0.8	811.5	515.6	1789.1	796.9	1093.8	1484.4	931.3	985.5	534	585.9	613.6	620.3	654.8	653.8	708.2	727.7	739.4	754.4	768.4	779.1	786.7	793.2	797.3	808.6	842.2	1172.5	8.36838e-05	8.22033e-06	7.54635e-05	9.1801	9.62847
156b	HU	2014	0.816	812.1	515.6	1734.4	796.9	1085.9	1484.4	961.1	954.7	525.1	565.3	601.3	634.2	664.1	687.8	698.8	728.1	750.3	765.6	775.2	777.3	791.4	797.4	805.2	833.4	1158.2	1313.3	7.53003e-05	4.91666e-06	7.03836e-05	14.3154	11.558
156b	HU	2014	0.904	842.8	523.4	1796.9	820.3	1078.1	1507.8	691.9	980.3	540.8	586.7	618.7	661.4	701	726.3	732.8	746.3	765.3	778	792.5	791.9	798.5	822.3	885.1	667.2	616.6	786.8	0.000160674	7.94316e-06	0.00015273	19.2279	12.8393
156b	HU	2014	0.76	842.3	523.4	1742.2	835.9	1109.4	1523.4	530.7	566.2	632.8	657.2	687.4	708.9	728.1	746	762.1	782.3	789.4	796.4	796.6	800.2	806	815.3	827	836.5	849.5	1152.1	0.000266437	1.28521e-05	0.000253585	19.731	12.9515
156b	HU	2014	0.728	854.3	523.4	1796.9	835.9	1046.9	1390.6	529.1	570.7	602.6	655.2	686.1	708.6	749.1	767.7	770.7	780.6	789	802.2	811.9	815.2	823.7	833.1	844.1	883.1	848.1	1181.6	0.000314108	1.36544e-05	0.000300454	22.0041	13.425
159c	HU	2014	0.552	547.2	492.2	1492.2	570.3	914.1	1007.8	851.2	871.1	895.1	908.7	525.2	552.2	555	519.2	562.5	548.3	960.2	965.2	970.8	969.5	536.8	970.2	972.6	968.1	718.2	726.8	0.000743466	5.53529e-05	0.000688113	12.4314	10.9452
159c	HU	2014	0.544	972.5	539.1	1867.2	914.1	968.8	1414.1	840.7	862.6	880.4	898.8	917.7	932.3	951.5	966.8	970.1	962.8	966.3	972.9	981.2	984.9	977.5	971.5	970.8	973	917.8	859	0.0030633	0.000176126	0.00288717	16.3926	12.1465
159c	HU	2014	0.528	991.7	812.5	1859.4	937.5	992.2	1390.6	823.4	835.5	848.3	878.8	896.1	915.7	925.5	937.9	946.7	965	961.9	967	972.4	976	979.1	978	979.8	1000.5	977.2	933.6	0.00271505	8.25615e-05	0.00263249	31.8851	15.0359
159c	HU	2014	0.528	978.6	820.3	1875	921.9	984.4	1593.8	845	861.7	870.8	899.3	919	959.8	966.4	978.3	980.8	985.2	983.9	976.1	977.7	982.8	980.7	982.5	982	987.4	914.3	866.2	0.00341877	0.000122788	0.00329599	26.843	14.2883
159c	HU	2014	0.52	986.7	578.1	1843.8	906.3	984.4	1265.6	832.5	868.4	877.8	901.7	922.3	578.2	605.6	610.2	994.3	993.8	978.2	618.4	982.4	985.6	988.5	988.2	985.3	980.4	955.3	858.6	0.00258638	8.6812e-05	0.00249957	28.7929	14.5929
159c	HU	2014	0.512	983.9	820.3	1851.6	921.9	992.2	1546.9	842.9	869.7	875.2	897.3	888.2	930.2	972.4	982.2	988.5	979.3	965.5	966.5	975.7	977.5	978.8	978	978.5	980.2	958.3	874.4	0.00302512	0.000171804	0.00285331	16.6079	12.2032
159c	HU	2014	0.528	976	820.3	1867.2	921.9	984.4	1554.7	827	859.7	869	892.2	914	949.7	961.8	971.1	970.8	962.8	970.5	972.8	975.4	983	980.2	974.9	974.8	971.5	906.9	856.1	0.00321608	0.000147316	0.00306877	20.8312	13.1871
159c	HU	2014	0.536	979.7	507.8	1859.4	914.1	984.4	1437.5	853.9	868.6	881.1	895.3	914.9	935.2	979	988.6	987	530	526.7	979.4	983.8	983.8	977.9	976.9	974.7	514.3	533.9	524.6	0.00405292	0.000195872	0.00385705	19.6917	12.9428
159c	HU	2014	0.528	976.2	507.8	1835.9	867.2	960.9	1171.9	842.4	866.5	874.9	897.6	921.2	578.8	981.2	588.1	600.2	971.9	973.7	979.5	976.7	976	533.4	546.1	532.7	544.1	933.9	667.1	0.00288849	0.000116496	0.002772	23.7947	13.7648
159c	HU	2014	0.496	984.8	820.3	1859.4	929.7	984.4	1375	848.2	874	886.2	906.6	927.9	951.6	967.8	975.6	985.6	990.6	993	991.6	987.7	985.2	982.7	981.3	976.5	973.7	953.6	857.7	0.00292335	6.11849e-05	0.00286217	46.779	16.7005
159c	HU	2014	0.496	981.5	515.6	1875	804.7	960.9	1179.7	853.9	878.3	576.7	913.3	932.9	585.2	962.4	978	980.7	985.1	987.2	986.8	984.1	983	986.6	985.5	983.5	983.5	964.7	875.3	0.00281842	0.000372906	0.00244552	6.558	8.16771
159c	HU	2014	0.472	999.8	835.9	1851.6	945.3	1000	1046.9	869.5	889.9	896.3	915.5	945.9	970	984.6	998.6	1015	1014.2	1004.2	1001.8	998.3	993.4	989.8	986.1	984.4	982.1	965.8	869	0.00378728	4.99476e-05	0.00373734	74.8251	18.7405
159c	HU	2014	0.488	1000.8	835.9	1835.9	945.3	1000	1046.9	869.9	894.5	906.3	930.2	955.5	986.6	1001.5	1018.2	1021.2	1012	1002.6	1003.8	1007.4	1003.2	996.9	993.3	985.4	977.6	957.3	867.8	0.00282881	6.31076e-05	0.0027657	43.8251	16.4172
159c	HU	2014	0.48	1006.2	843.8	1851.6	945.3	1000	1039.1	862.7	887.9	901.2	918.8	948.6	973	989.3	1007.1	1011.8	1014.5	1015.1	1011.7	1009.3	1001.5	992.9	986.1	984.1	983	968.4	866.9	0.00467015	6.48958e-05	0.00460526	70.9639	18.5104
159c	HU	2014	0.488	1003	570.3	1859.4	937.5	992.2	1039.1	877.7	901.9	913.7	928	953.2	989	1003.9	1007.6	1014	1015.6	1011.2	1007.8	1004.2	1000.4	995.6	582.6	982.2	955.6	957.8	867.9	0.00380371	7.82649e-05	0.00372545	47.6005	16.7761
159c	HU	2014	0.496	976.2	812.5	1875	921.9	976.6	1507.8	834.7	860.1	868.5	889.3	915.4	931	952.7	967.6	973.3	971.7	972.6	978.6	984.6	985.5	985.8	982.8	981.4	980.1	957.5	868.2	0.00273295	0.000106022	0.00262693	24.7772	13.9405
159c	HU	2014	0.488	1003.3	835.9	1851.6	945.3	1007.8	1062.5	858.9	882.7	891	909.7	928.1	984.2	999.9	1003.7	1023.6	1006.6	1005.7	1006.7	993.1	982.3	977.7	978.1	978.5	979.8	958.9	867.7	0.00473937	9.22858e-05	0.00464709	50.3554	17.0205
159c	HU	2014	0.496	989.9	828.1	1851.6	929.7	992.2	1343.8	850.9	879.9	889.1	905.6	931.8	978.1	990.6	998.1	991	980.6	983.1	982.2	987.3	986.3	984.4	982.1	974.6	971.2	921.9	839.9	0.00424206	0.000100926	0.00414114	41.0316	16.1312
159c	HU	2014	0.496	989.1	828.1	1859.4	929.7	984.4	1296.9	848	876.4	884.7	899	921.7	964.5	982.8	989	990.9	996.1	994.9	988.5	985.5	985.9	984.5	981.4	975.7	971.1	950.6	867.3	0.00412303	0.000169553	0.00395348	23.317	13.6767
159c	HU	2014	0.536	978.6	523.4	1867.2	890.6	976.6	1515.6	604.6	649.9	862.6	877.4	896.4	910.9	955.9	972.1	981.4	981.6	984.1	986	549.7	979.4	977.8	547	971.9	970.3	946.2	843.7	0.00379652	0.000171075	0.00362544	21.1921	13.2617
185b	HU	2013	0.712	937.4	593.8	1882.8	890.6	1031.3	1546.9	652.5	671.6	643.1	686.3	696	721.6	755.5	817.9	819.1	823.2	854.2	868.2	871.1	874.5	879.7	891.3	893	918	897.1	927	4.47846e-05	8.13684e-07	4.39709e-05	54.0393	17.3271
185b	HU	2013	0.664	933.5	593.8	1898.4	914.1	1273.4	1632.8	611.8	630.2	646.6	633.6	646.3	683.6	720.7	757.6	805.3	790.8	810.3	853.7	866.8	872	882.3	886.7	892.1	919.5	935.4	987.6	5.59703e-05	2.7803e-07	5.56922e-05	200.31	23.017
185b	HU	2013	0.68	931.4	632.8	1898.4	929.7	1226.6	1617.2	675.2	690.8	1436.3	749.3	720.6	757.9	832.5	810.4	871.7	890.5	898.7	901.6	904.2	916.4	927.1	929.7	925.3	929.8	956.7	1014.4	8.1419e-05	1.43467e-07	8.12755e-05	566.511	27.5321
185b	HU	2013	0.752	927	656.3	1890.6	929.7	1140.6	1578.1	636.2	667.8	690.2	725.8	731.7	792.7	817.6	805.1	822.4	885.1	899.2	904.4	912.5	917.5	919	925.5	930	974.4	922.9	566.5	8.27396e-05	2.78541e-07	8.2461e-05	296.046	24.7136
185b	HU	2013	0.72	910.3	585.9	1875	898.4	1328.1	1609.4	601.7	616	608	685.2	650.1	685.7	718.7	782.7	772.9	798.2	852.7	866.2	864	873.9	878	878.1	884.7	882.4	897.9	918.3	5.44374e-05	3.68499e-07	5.40689e-05	146.727	21.6651
185b	HU	2013	0.76	923.7	679.7	1890.6	921.9	1281.3	1617.2	608.2	685.9	708.3	688	716.4	804.5	800.3	814.2	873.6	888.9	891.3	904.9	918.8	924.2	922.8	921	923.3	961.8	924.7	944.8	7.82357e-05	4.37676e-07	7.77981e-05	177.753	22.4982
185b	HU	2013	0.744	926.1	625	1890.6	914.1	1140.6	1593.8	665.2	683.6	641.9	736.6	710.3	749.4	794.6	817.4	877.9	890.6	890	896.4	908.9	910.7	915.3	917.2	925.6	921.3	927.8	869.2	5.83006e-05	2.02787e-07	5.80978e-05	286.496	24.5712
185b	HU	2013	0.696	924.4	695.3	1890.6	898.4	1070.3	1585.9	700.5	713	741.3	719	803.4	778.3	805.7	872	890.9	875.3	923.1	927.2	930.8	929.3	925	917	920.3	933.9	922.1	941.9	6.43481e-05	2.2805e-07	6.41201e-05	281.166	24.4896
185b	HU	2013	0.776	921.1	640.6	1890.6	914.1	1375	1648.4	620.6	670.2	692.1	725.9	747.6	730.8	759.8	788.3	827.7	882.7	895.5	903.7	908.7	912.6	919.4	917.8	923.7	926.3	928.5	929.1	8.34013e-05	3.57009e-07	8.30443e-05	232.612	23.6663
185b	HU	2013	0.776	919	632.8	1890.6	914.1	1289.1	1609.4	1056.7	676.4	1413.3	755.7	792.2	761.4	854.5	873.3	880.3	888.7	909.8	917.1	917.8	920.8	921.3	917	921.3	944.2	926.2	947.1	0.000100051	3.8156e-07	9.96694e-05	261.216	24.17
185b	HU	2013	0.68	932.3	703.1	1937.5	929.7	1328.1	1609.4	1403.3	715.7	746.5	773.7	803.5	828.8	857.9	883.2	897.3	915.3	926.8	937.2	936.4	935.9	935.3	933.2	939.1	939.4	924.8	963	2.28665e-05	6.54996e-06	1.63166e-05	2.4911	3.9639
185b	HU	2013	0.68	934.1	687.5	1890.6	898.4	1265.6	1570.3	582.8	713.8	735.1	779.7	814.6	850.8	879.9	900.3	912.7	928.1	934.6	941.2	943.8	946.2	944.1	939.7	931.3	926.7	920.8	945	1.24206e-05	2.1872e-07	1.22019e-05	55.7879	17.4654
185b	HU	2013	0.672	938.1	726.6	1906.3	914.1	1343.8	1640.6	735.8	749	771.5	794.2	821.6	860.6	887	898.2	912.5	929	937.2	944.9	948	947.6	945	943.3	934.4	928.8	928.3	929.5	2.03366e-05	2.76974e-07	2.00597e-05	72.4244	18.5988
185b	HU	2013	0.672	938.1	710.9	1914.1	937.5	1351.6	1656.3	718.6	737.1	765.9	799	824.9	854.3	876.6	891.8	914.2	924.7	939.5	943.5	944.7	939.4	937.4	936.7	931.8	925	917.8	956.4	3.80382e-05	3.56116e-07	3.7682e-05	105.814	20.2454
185b	HU	2013	0.776	944	718.8	1914.1	945.3	1367.2	1656.3	1274.3	623.8	1087.5	1315.2	757.1	1298.4	830.4	859.2	883.4	913.3	933.4	943.5	949.1	941.2	939.3	935.5	937.4	929.7	924.3	942.5	5.37201e-05	7.34872e-06	4.63714e-05	6.31013	8.00039
185b	HU	2013	0.664	922.4	703.1	1882.8	929.7	1429.7	1671.9	706	717.9	739	768.8	796.7	836.1	862	876.4	885	902.9	910.4	920.8	924.6	925.4	926	925.4	922	913.7	915.2	1217.4	3.2195e-05	5.016e-07	3.16934e-05	63.1845	18.0061
185b	HU	2013	0.672	930.4	718.8	1906.3	929.7	1453.1	1679.7	729.5	745.7	755.2	792.3	824.9	854.3	879.4	894	915.5	925.1	934.5	932.8	937.4	935.8	934.9	930.7	926.7	926.6	922.6	1210.3	4.57075e-05	2.36626e-07	4.54709e-05	192.163	22.8367
185b	HU	2013	0.64	943.8	726.6	1921.9	937.5	1367.2	1656.3	737.9	746.9	774.4	796.7	826	871.2	893.2	908.8	922.2	930.2	939.6	946.8	945	949.1	943.9	932.4	930.1	925.8	922.2	1070.6	5.11818e-05	1.06873e-07	5.10749e-05	477.905	26.7934
185b	HU	2013	0.648	938.8	718.8	1921.9	929.7	1390.6	1656.3	725	742.1	772.8	803.3	832.1	863.2	883.1	907.2	922.7	940.5	943.5	945.9	946.7	944.4	940.5	937.3	931.4	920.7	922.8	969.6	5.56781e-05	2.09784e-07	5.54683e-05	264.407	24.2227
185b	HU	2013	0.632	927.9	703.1	1898.4	906.3	1406.3	1640.6	706.5	718.6	743	774.8	812	846.1	867.2	879.3	897.7	916.1	927.6	932.6	935	934.2	928.5	931.5	927.9	922	910.7	891.8	4.75042e-05	1.39136e-07	4.73651e-05	340.423	25.3202
185b	HU	2013	0.624	945.5	742.2	1898.4	921.9	1117.2	1617.2	751.8	755.6	785.6	811.1	847	879.5	889.4	906.9	924.6	938.9	949.6	947.6	947.8	946.8	946.2	946.2	940.7	935.3	939.5	507	5.7547e-05	7.07675e-07	5.68394e-05	80.3184	19.0482
185b	HU	2013	0.648	962.8	765.6	1898.4	945.3	1140.6	1640.6	777.3	788.7	810.4	853.4	883.1	906.9	917.4	933	951.4	956.4	961.2	963.2	969.6	971.6	967.2	957.8	949.5	946.6	945.9	1150.4	8.40681e-05	2.33498e-07	8.38346e-05	359.038	25.5514
188a	HU	2013	0.544	1143.5	945.3	1195.3	1070.3	1125	1156.3	1082.5	1094.4	1104.5	1112.3	1118.6	1122.7	1127.4	1140.3	1146.4	1147.1	1150.7	1153.2	1156	1152.7	1147.2	1134.6	1120.7	1099.7	977.7	990.5	0.000384413	5.25523e-07	0.000383888	730.486	28.6361
188a	HU	2013	0.56	1144.8	875	1195.3	1062.5	1125	1164.1	881.1	1081.2	1072.6	1105.4	1103.4	1113.5	1124.7	1132.6	1138.9	1150.9	1152.4	1156.7	1153.9	1151.1	1148	1142.3	1105.8	1063.2	1028.4	1029.8	0.000393956	8.61733e-07	0.000393094	456.167	26.5912
188a	HU	2013	0.544	1150.8	867.2	1203.1	1078.1	1125	1164.1	869.5	1086.2	892.8	1083.8	1100.5	1120.6	1134.8	1142.3	1148.4	1157.5	1161	1160.1	1158.6	1162.1	1164.5	1162.4	1140.3	1113.2	1078.6	944.3	0.000652497	5.39121e-07	0.000651958	1209.3	30.8253
188a	HU	2013	0.568	1143.9	1023.4	1195.3	1085.9	1125	1164.1	1087.9	1103.5	1090.8	1096	1104.2	1118.8	1136.4	1141.4	1147.7	1152.2	1155.1	1153.4	1156	1157.7	1153.5	1124.9	1103.3	1081.1	1087.7	1053.3	0.000620662	1.2902e-06	0.000619372	480.06	26.813
188a	HU	2013	0.52	1155.7	945.3	1226.6	1093.8	1140.6	1179.7	1128.1	1113.6	1127.5	1139.9	1138.7	1146	1154.7	1167.4	1175.1	1175.8	1184	1187.8	1180.5	1178.4	1174.3	1173.6	1155.5	1101.7	1079.6	952.6	0.000579108	5.12655e-07	0.000578596	1128.63	30.5255
188a	HU	2013	0.544	1098.4	906.3	1210.9	1078.1	1117.2	1164.1	1096.8	1083	1086.2	1093.8	1118.9	1127.9	1139.3	1147.9	1152.4	1163.5	1170	1165.2	1166	0	1166.3	1144.6	1110.6	1082.4	1035.4	839.9	0.000531863	1.51007e-07	0.000531712	3521.12	35.4668
188a	HU	2013	0.552	1149.7	1000	1226.6	1093.8	1140.6	1179.7	558.1	1089.8	1097.4	1116.9	1138.7	1140.2	1147.8	1164.9	1165	1166.9	1177.8	1185.3	1184.6	1173.4	1164.5	1158.9	1133.4	1095.9	1033.1	1021.9	0.000898013	1.63526e-07	0.000897849	5490.57	37.3962
188a	HU	2013	0.608	1096.1	968.8	1234.4	1085.9	1125	1171.9	1020.7	1073.9	1085	1097.2	1109.8	1123	1141.4	1149.2	1155.7	1166.7	1176.2	1181.1	1192.5	1186.1	1191.1	1194.8	1191.6	1167.5	1143.3	1079.6	0.000536106	2.92561e-05	0.00050685	17.3246	12.3866
188a	HU	2013	0.576	1149.2	929.7	1242.2	1046.9	1117.2	1171.9	960.8	1008	1032	1050.7	1101.7	1120.5	1140.3	1151.7	1164.7	1170.7	1178.1	1184.2	1186.8	1183.1	1178.9	1176.3	1178.9	1156.8	1095.2	1018.5	0.000338949	1.30471e-06	0.000337644	258.788	24.1294
188a	HU	2013	0.592	1150.2	968.8	1242.2	1093.8	1140.6	1179.7	1053.9	1083	1081.1	1092.6	1103.6	1120.3	1132	1145.6	1146.1	1167.9	1167.2	1170.8	1168.7	1175	1181.1	1183	1177.6	1160.3	1135.4	805.9	0.000607	1.00741e-05	0.000596926	59.2537	17.7272
188a	HU	2013	0.608	1103.3	945.3	1257.8	1078.1	1125	1171.9	1053.4	1079.7	1079.5	1090.9	1106	1117.2	1124.8	1135.7	1149.3	1163.2	1159.9	1167.1	1170.8	1164.7	1157	1169.1	1161.2	1128.3	837	1018.7	0.00064949	1.76278e-05	0.000631862	35.8447	15.5442
188a	HU	2013	0.584	1100.4	953.1	1242.2	1093.8	1140.6	1187.5	554.6	1086.2	1094	1106.3	1118.1	1131.8	1154.9	1162.6	1168.2	1157.8	1175.5	1189.4	1179.4	1172	1175.7	1202.8	1195.9	1133.5	1095.3	1015.1	0.000655925	8.55107e-06	0.000647374	75.7068	18.7913
188a	HU	2013	0.576	1148.5	976.6	1250	1085.9	1140.6	1187.5	1029.1	1056.6	1071.6	1095.8	1103.9	1117.7	1124.9	1143.4	1147.3	1164.6	1178.7	1184.3	1190.2	1201.5	1190.5	1111.8	1102.2	1192.5	1151.2	1038	0.000651742	1.18569e-05	0.000639885	53.9672	17.3213
188a	HU	2013	0.592	1140.4	945.3	1242.2	1062.5	1132.8	1179.7	965.6	992.6	1005.5	1017	1054	1086.2	1110.2	1125.2	1131.7	1139.3	1135.2	1173.1	1175.3	1173.4	1178.9	1184.1	1192.4	1159.9	1125.7	1143.5	0.0011153	9.32759e-06	0.00110597	118.57	20.7397
188a	HU	2013	0.592	1140	960.9	1257.8	1093.8	1148.4	1203.1	1046.9	1080.4	1082.8	1092.7	1099.5	1112	1132.2	1137.6	1151	1184.4	1171.6	1203.1	1204.2	1191.9	1202.1	1210	1197.2	1162.5	1131.9	1144	0.000891733	2.13162e-05	0.000870417	40.8336	16.1102
188a	HU	2013	0.608	1147.6	960.9	1273.4	1093.8	1148.4	1195.3	1015.9	1080.4	1083.9	1094.9	1109.3	1119.8	1139.8	1142.7	1154	1190.1	1190.1	1195.9	1200.8	1134.7	1198.9	1200.8	1187.1	1128.6	1033.8	1035	0.00075575	9.4275e-06	0.000746323	79.1644	18.9853
188a	HU	2013	0.568	1155.1	765.6	1218.8	1000	1117.2	1164.1	897.5	908	930	710.5	860.3	1078.8	1098.9	1116.6	1119.2	1132.2	1136.2	781.6	785.3	783.9	1163.1	1166.2	1071.1	1146.3	1070.6	1023.1	0.000227869	2.26942e-06	0.000225599	99.4085	19.9742
188a	HU	2013	0.592	1162	992.2	1250	1109.4	1156.3	1203.1	1062.3	1016.8	1123.7	1124.9	1134.5	1148.1	1152.4	1159	1158.8	1179.8	1201	1204.1	1208.2	1205.1	1183.8	1191.3	1195.7	1151.7	1161.9	1125	0.000379362	5.42671e-06	0.000373935	68.9063	18.3826
188a	HU	2013	0.592	1198.3	992.2	1257.8	1109.4	1156.3	1203.1	557	1097.7	1097.5	1105.1	1115.8	1132.2	1146.3	1157.3	1176.1	1188.9	1177.8	1205.4	1208.4	1201.2	1187.4	1211.9	1206.7	1140	1136.1	650.1	0.000368293	1.4226e-06	0.00036687	257.887	24.1143
188a	HU	2013	0.576	1111.8	968.8	1281.3	1101.6	1156.3	1210.9	539.4	1089.9	1102.4	1110.3	1132.3	1141.5	1164.2	1101.8	1195.1	1205.2	1206.7	1214.5	1218	1224.3	1229.3	1224.8	1220.3	1198.7	1084.4	589.8	0.000190525	1.58116e-06	0.000188943	119.497	20.7736
188a	HU	2013	0.536	1210.7	992.2	1257.8	1117.2	1171.9	1218.8	1101.3	1131.3	1138.5	1156.5	1143.6	1183.1	1191.9	1191.8	1188.5	1203.5	1203.6	1215.2	1216.6	1215.3	1213.5	1205.7	1186.7	1180.6	1188	1114.6	0.000275407	1.81224e-06	0.000273594	150.97	21.7889
188a	HU	2013	0.544	1178.2	546.9	1226.6	1078.1	1132.8	1179.7	633.8	1077.3	1075.2	1087.8	1110.8	1132.2	1089.1	1159.7	1163.6	1170.3	1180.9	1183.1	1189.1	1187.6	1185.2	592.9	1187.3	1169.4	548	553	0.000405625	1.49445e-06	0.00040413	270.421	24.3204
188a	HU	2013	0.512	1149.2	898.4	1218.8	1093.8	1140.6	1171.9	915.8	901.1	1097.2	1091.1	1102.4	1127.8	1140.2	1139.6	1151.2	1152.3	1156.5	1167.1	1177	1174	1156.3	1160.4	1156.4	1139.6	1123.9	1119.5	0.000321263	4.02876e-07	0.00032086	796.424	29.0114
188a	HU	2013	0.56	1135.4	1039.1	1234.4	1101.6	1148.4	1187.5	1070.2	1092.4	1110.4	1124.8	1131.8	1157.2	1162.6	1169.8	1181.8	1183.8	1188	1192.6	1198.6	1195.4	1184.2	1183.1	1177.3	1153.1	1102.5	1112.6	0.000356064	5.63375e-07	0.000355501	631.021	28.0004
188a	HU	2013	0.536	1178.4	1054.7	1242.2	1117.2	1156.3	1195.3	1089.4	1102.4	1034.2	1123.7	1128.3	1139.9	1162.4	1182.4	1179	1183.9	1190.9	1201.3	1201	1199.9	1195.7	1196.8	1199.5	1161.3	1116.6	1127.1	0.000299682	1.05677e-07	0.000299577	2834.82	34.5253
188a	HU	2013	0.536	1132.6	1046.9	1242.2	1117.2	1148.4	1195.3	1092.8	1115.5	1127.8	1131.3	1140.7	1170.5	1185	1190.8	1198.6	1202.8	1202.7	1205.2	1205.8	1205.6	1200	1181.5	1157.9	1143.1	1129.3	833.7	0.00036017	1.10048e-06	0.000359069	326.283	25.1359
188a	HU	2013	0.528	1160.6	960.9	1234.4	1078.1	1132.8	1171.9	993.3	955.7	1059.1	1072.9	1103.8	1122.8	1134.1	1149.7	1156.9	1176.4	1186.9	1196.8	1187	1188.1	1190	1194.9	1092.8	1110.2	1093.9	810.6	0.000175295	6.744e-07	0.000174621	258.928	24.1318
188a	HU	2013	0.544	1165.4	953.1	1226.6	1078.1	1140.6	1179.7	970.5	1064	1073.4	1098.8	1125.6	1141.3	1151.4	1159.4	1166.3	1156.8	1160.6	1184.1	1185.9	1192.7	1180.9	1179.3	1155	1149.1	1143.5	1108.5	0.000275073	4.98959e-07	0.000274574	550.293	27.4059
188a	HU	2013	0.568	1179.8	1023.4	1242.2	1109.4	1148.4	1195.3	1090.6	1103.6	1108.5	1124	1141.5	1159	1169.3	589.8	1180.7	1189.4	598.4	1199.9	1202.3	1197.3	1195.1	1173.2	1144.9	1118.4	1098	1076.2	0.000208924	2.43146e-07	0.000208681	858.252	29.3361
188a	HU	2013	0.576	1126.5	960.9	1453.1	1101.6	1148.4	1203.1	992.3	1080.7	1083.7	1091.6	1106.6	1126	1127.6	1142.2	1153.9	1187.1	1188.9	1187.3	1105.7	1207.1	1202.8	1186.9	1177.8	1174.2	1164.5	1125.8	0.000334255	9.49549e-07	0.000333305	351.014	25.4532
188a	HU	2013	0.6	1128	960.9	1265.6	1078.1	1140.6	1187.5	991.9	959.2	1065.8	1077.9	1096.8	1072.5	1123.6	1129.4	1155.5	1156.2	1175.6	1174.7	1178.2	1186.4	1156.4	1195.3	1171	1144.5	883.7	1122.2	0.000254381	2.53655e-06	0.000251845	99.2863	19.9689
188a	HU	2013	0.616	1087.9	929.7	1250	1046.9	1109.4	1164.1	960.2	1004.8	1024.7	1027	1045.7	1069.4	1080.1	1098.2	1118.6	1130.4	1152.1	1165.7	1129.2	1168.9	1172.3	1173.7	1176.7	1166	1131.3	1038.5	0.000745281	2.38419e-05	0.000721439	30.2592	14.8086
188a	HU	2013	0.568	1130	960.9	1234.4	1062.5	1117.2	1164.1	983.6	1016.4	1059.1	1080.2	1086.2	1110.9	1132.7	1121.1	1156	1176.9	1172.2	1185.8	1183.1	1195.7	1188.5	1167	1181.3	1166.3	1129.7	1077.8	0.000574855	3.07245e-06	0.000571783	186.1	22.6975
189a	HU	2013	0.776	1031.5	554.7	1796.9	875	1007.8	1117.2	0	661.1	679.8	699.9	727	753.3	784.8	814.4	842.4	863.2	931.5	1013.9	1028.5	1024	1039.8	1068.8	1081.8	1117.5	1122.2	1001.8	0.00097221	6.55865e-08	0.000972145	14822.3	41.7092
189a	HU	2013	0.8	900.8	570.3	1828.1	875	1007.8	1132.8	0	666	698.7	730.2	758.3	791.1	825.8	855.2	890.8	906.4	956.9	1042.1	1047.5	1045.3	1065.8	1083.9	1119.5	1150.3	1161.9	1013	0.00110188	1.65869e-06	0.00110022	663.308	28.2172
189a	HU	2013	0.776	1016.8	609.4	1835.9	882.8	1007.8	1125	623.8	671.2	700.3	721	747.6	788.3	809.9	832.6	853.4	890	932.5	1008.7	1022.2	1041.2	1065	1083.1	1123.3	1162.7	1152.9	1006.2	0.00104576	6.98967e-08	0.00104569	14960.5	41.7494
189a	HU	2013	0.696	920.7	609.4	1859.4	867.2	968.8	1093.8	627	663.6	681.5	702.1	727.1	745.5	763.3	780.6	802.5	813	827.2	848.7	877.8	884.8	894.8	919.2	974.7	1050.2	1080.2	827.7	0.000995672	5.99441e-08	0.000995612	16609	42.2034
189a	HU	2013	0.656	936.3	687.5	1867.2	882.8	968.8	1085.9	690	705.7	728.1	743	770	780.9	797.9	823.2	830.7	841.3	863.1	877.9	914.3	923.6	942.7	971.8	994.4	1075.3	1067.7	852.5	0.00144397	5.8156e-08	0.00144391	24828.3	43.9495
189a	HU	2013	0.656	936.1	625	1812.5	882.8	984.4	1093.8	670.2	689.7	706.1	731.5	749	776.8	790.4	809.3	824	843.1	854.8	873.5	890.2	936.8	984.7	1034.7	1049.5	1074.2	1079.4	792.9	0.00131138	6.1101e-08	0.00131132	21461.5	43.3166
189a	HU	2013	0.744	922.4	679.7	1867.2	898.4	1000	1125	689.1	704	725.3	749.2	787.8	802.3	818.9	838.8	860.7	889.3	908.7	923.5	956.1	977.9	1013.7	1054.2	1101.1	1142.6	1079.9	992.2	0.00165578	6.3939e-08	0.00165572	25895.2	44.1322
189a	HU	2013	0.68	930.1	710.9	1875	906.3	992.2	1109.4	721.7	742.1	763.4	786.6	807	822.5	841.7	856	874.7	894.9	919.1	942.2	967.5	985.9	1009.2	1032	1061.3	1118	1123.7	928.9	0.00211475	6.01334e-08	0.00211469	35166.7	45.4613
189a	HU	2013	0.648	923.1	679.7	1867.2	890.6	976.6	1078.1	683	692.5	713.9	725.2	753.3	768	786	804.3	828	840.8	879	894.8	918.5	938.2	948.7	975.9	1009.3	1053.8	1068.9	811.3	0.00156768	6.79623e-08	0.00156761	23065.8	43.6297
189a	HU	2013	0.616	921.7	726.6	1875	890.6	976.6	1062.5	736.3	753.5	776.2	786.7	805.8	825.2	846.1	860.8	874.3	886.8	902.5	923.3	949.4	969.7	966.4	979.3	1017.4	1043	1043.5	813.3	0.00203932	4.83485e-08	0.00203927	42178.6	46.2509
189a	HU	2013	0.656	937.6	742.2	1867.2	906.3	984.4	1085.9	744.9	762	782.3	802.6	822.9	844	857.3	885	905	917.8	934.9	952.8	973.1	989.7	1001.8	1006.4	1034.5	1078.7	1073.3	833.5	0.00264327	9.7024e-08	0.00264317	27242.5	44.3525
189a	HU	2013	0.656	997.4	687.5	1742.2	906.3	1007.8	1125	694	713.9	741.5	760.3	791.5	810	838.8	856.9	859.7	888.1	958.5	967.3	995.9	1010.2	1025.7	1076.7	1118.9	1149.6	1142	985.2	0.00190279	6.43765e-08	0.00190273	29556.3	44.7065
189a	HU	2013	0.648	945.1	695.3	1875	890.6	976.6	1109.4	697.7	717.9	736.6	750.3	770.2	796.9	820.4	831.7	857	868.8	881.2	896.5	909	917.6	935.3	958	995.2	985	1079.4	819.4	0.00195449	3.2372e-07	0.00195417	6036.59	37.8079
189a	HU	2013	0.68	1030.7	695.3	1851.6	906.3	1015.6	1132.8	705.6	718.4	730.3	754.5	776.2	802.9	824.9	846.9	860.3	884.9	895.9	929.7	982.9	1012.8	1032.3	1058.4	1094.3	1163.6	1106.9	790.9	0.00162555	5.81255e-08	0.0016255	27965.3	44.4662
189a	HU	2013	0.68	998.4	734.4	1843.8	914.1	1007.8	1125	753.2	787.9	800.3	828.4	843	855.9	873.8	894.8	913.6	950.3	978.7	1001.1	1005	1003.1	1010.5	1038.3	1106.6	1156.8	1107.4	777.6	0.00229581	4.81047e-08	0.00229576	47724.4	46.7874
189a	HU	2013	0.64	1000.1	726.6	1828.1	906.3	1000	1109.4	738	769	789.4	808.3	825.1	851.4	868.3	888.4	910	932.6	983.6	1003.5	1009.6	1008.4	1019.8	1057.7	1107.2	1134.3	1102.9	802.4	0.00231188	2.05539e-07	0.00231168	11246.9	40.5103
189a	HU	2013	0.624	971.1	742.2	1843.8	906.3	1000	1093.8	747.1	781.8	785.4	807.9	836.7	863.8	879.7	890.3	902	917	965.4	980.9	1006.2	1024.7	1044.7	1048	1075.1	1110.6	1103.2	836.8	0.00227668	2.78433e-07	0.0022764	8175.75	39.1253
189a	HU	2013	0.664	994.2	757.8	1835.9	914.1	1007.8	1109.4	776.4	809.5	820.9	847	858.9	878.6	909	935.4	980.3	996.1	1017.3	1028.7	1020.5	1024.7	1056.6	1074	1110	1146.1	1138.1	842.6	0.00286025	6.22661e-08	0.00286019	45934.9	46.6214
189a	HU	2013	0.624	961.3	742.2	1851.6	906.3	992.2	1093.8	756.7	781.3	800.6	821.4	846.1	867.3	881.3	897.2	911.7	936.1	966.7	990.4	1034.3	1042.8	1034.9	1033.1	1046.5	1105.9	1103.6	834.3	0.00258213	7.22147e-07	0.00258141	3574.63	35.5323
189a	HU	2013	0.568	1008.6	765.6	1851.6	906.3	984.4	1062.5	792.6	823.7	841.7	859.2	871.6	890.5	913	937.1	955	990.3	1013.8	1018.8	1031.3	1053.2	1049.9	1055.2	1061.8	1071.4	1006.3	819.9	0.00294353	6.99297e-08	0.00294346	42091.7	46.242
189a	HU	2013	0.568	971	773.4	1843.8	906.3	984.4	1062.5	777.4	840	856.9	870.8	881.6	889	900.7	923.4	959.3	976.7	983.2	1009.3	1021.5	1022.9	1023.9	1041.3	1037.5	1071.6	1050.2	805.2	0.00280576	9.05923e-08	0.00280567	30970.2	44.9094
189a	HU	2013	0.608	969.9	718.8	1835.9	898.4	992.2	1085.9	726.2	750.8	772.1	788	808.8	832.7	856.4	877.6	893.3	910.5	950.7	973.4	988.2	995.4	1022.1	1039	1075.7	1103.3	1072.2	835.7	0.00203205	6.65197e-08	0.00203199	30547.1	44.8497
189a	HU	2013	0.64	991.2	742.2	1843.8	906.3	1000	1101.6	748.9	775	795.6	810.3	834.9	856.9	869.2	894	918	957.7	989.4	995.1	994.6	997.7	1010.5	1044.8	1084.1	1140.3	1132.5	834.5	0.00241443	5.64773e-08	0.00241437	42749.5	46.3093
189a	HU	2013	0.624	987.3	695.3	1835.9	890.6	976.6	1109.4	706.1	722.9	738.3	760.7	776.2	797.7	824.3	839.5	849.6	879.2	916.5	940	979.5	991.5	972.3	983.5	1010.1	1093.7	1109.2	798.6	0.00180496	5.33434e-08	0.00180491	33835.6	45.2937
189a	HU	2013	0.592	967.5	718.8	1843.8	898.4	984.4	1093.8	737.3	757.8	779.8	798.5	820.9	849.3	863.5	878.8	903.4	926.2	947.3	967.7	982.9	975.1	979.9	997.3	1035.8	1076.1	1105.7	882.1	0.00227615	5.26249e-08	0.0022761	43251.4	46.36
189a	HU	2013	0.64	960.9	710.9	1843.8	906.3	1000	1125	725.3	747.3	769.3	784.7	809.8	843.8	860	870.1	889.5	911.5	943.5	967.6	973.9	979.3	997.8	1055.2	1101.3	1161.1	1142.9	836.7	0.00242994	5.37871e-08	0.00242988	45175.9	46.5491
189a	HU	2013	0.648	999.7	757.8	1851.6	914.1	1000	1093.8	757.8	806.6	825.2	837.7	856.6	887.1	906.3	922.6	950.6	982.9	1000.3	1014	1018.4	1014.6	1031.7	1057.9	1091.4	1111.5	1087.2	828.5	0.00370927	5.79886e-08	0.00370921	63964.5	48.0594
189a	HU	2013	0.592	991.5	757.8	1859.4	906.3	992.2	1078.1	753.2	799.2	811.3	828.6	850.3	870.5	888.8	914	933.5	966.7	981.6	997.1	1012.3	1020.2	1023.4	1031.7	1047.8	1093.8	1016.3	851.9	0.00314464	4.10537e-07	0.00314423	7658.82	38.8416
189a	HU	2013	0.592	961.3	718.8	1843.8	882.8	968.8	1054.7	728.6	744.7	756.6	780.4	801.9	819.6	838.3	858.5	881.1	897.1	915.3	949.5	965.9	977.7	973.6	986.1	1011.9	1046.2	1019	841.8	0.00233623	4.97876e-08	0.00233618	46923	46.7139
189a	HU	2013	0.608	992.5	757.8	1859.4	906.3	976.6	1054.7	783.8	806.3	827.2	840.3	856.7	878.9	899.5	914.7	933.8	956.2	983.7	1000.1	1013.9	1011.2	1009.6	1020	1038	1057	1006.2	833.8	0.00314311	4.97755e-08	0.00314306	63144.8	48.0034
189a	HU	2013	0.592	992.1	765.6	1828.1	906.3	976.6	1046.9	761.8	807.4	819.9	837.5	866.3	883.4	911.4	927.8	961.6	984.6	996.8	1011.4	1007.2	1014.4	1015.3	1017.4	1024.1	1042	1050.2	936	0.00360375	4.74709e-08	0.00360371	75914	48.8032
189a	HU	2013	0.568	992.5	781.3	1835.9	914.1	984.4	1054.7	793.5	847.9	853.9	868.2	880.4	902.3	930.5	951.9	977.9	998.4	1011.4	1022.5	1032.3	1035.5	1036.7	1023.9	1023.6	1056.9	1038.3	852.3	0.00374693	5.86964e-08	0.00374687	63834.8	48.0506
190a	HU	2013	0.552	918.3	765.6	1078.1	898.4	937.5	1031.3	844.8	883.2	930.2	1002.6	1042.2	1039.7	1002.7	931.5	922.8	921.1	914.6	911.3	915.1	913.9	912	907.7	897.2	876.1	713.3	600.6	0.0049997	2.07827e-06	0.00499762	2404.7	33.8106
190a	HU	2013	0.552	919.2	796.9	1046.9	898.4	937.5	1015.6	843.8	883	931.9	999.8	1010.8	1011.7	983.7	928.7	917	916.4	914.2	914.2	915.5	910	905.6	901.9	895.1	876	773.7	954	0.00514163	1.15648e-06	0.00514047	4444.94	36.4787
190a	HU	2013	0.544	933.1	828.1	1046.9	898.4	945.3	1000	849.7	898.2	939.7	918.3	1018.6	1009.9	976.9	946.7	941.7	929.1	921.7	919	917	917	914.7	912.7	896	875.3	773.4	674.5	0.00550937	2.64828e-07	0.00550911	20802.6	43.1812
190a	HU	2013	0.552	928.2	843.8	1054.7	906.3	937.5	1000	855.3	899.4	932.2	1005.2	1026	1004.9	969.4	936.4	929.2	922	921	922.7	923.5	920.3	918	911	900	876.6	652.1	938.5	0.00579107	7.09381e-07	0.00579036	8162.55	39.1183
190a	HU	2013	0.552	921.4	820.3	1039.1	898.4	937.5	1007.8	789.9	881.6	920.8	985.3	1006.8	976.6	954.3	939.1	924.9	921.6	917.8	915.3	916.7	915.8	910.8	905.7	895.2	874.4	695.2	615.5	0.00516615	8.75812e-07	0.00516528	5897.7	37.7068
190a	HU	2013	0.536	912.4	757.8	1023.4	890.6	929.7	1000	797.7	878.6	909.4	939.4	982.1	987.1	968.6	922	910.9	913.5	915.1	915.7	913.9	913.2	908.7	904.2	896.6	891.6	853	692.4	0.00477495	4.84372e-07	0.00477446	9857.02	39.9375
190a	HU	2013	0.52	920.4	804.7	1046.9	898.4	937.5	1007.8	808.3	899.4	923.1	917.8	1001.3	987.8	989.6	925.2	932.8	923.2	920.5	918.6	916.3	912.7	909.3	904.8	903	881.3	800.8	616.9	0.00499569	1.04392e-06	0.00499464	4784.51	36.7984
190a	HU	2013	0.528	928.2	781.3	1062.5	898.4	945.3	1015.6	804.4	882.7	914.9	1004.6	1031.3	1001.4	973.5	961	953.3	938.2	927.5	920.7	920.8	916.9	912	905.2	896.9	876.3	765.2	622.4	0.004508	1.23255e-06	0.00450677	3656.46	35.6306
190a	HU	2013	0.52	926.9	773.4	1023.4	898.4	937.5	992.2	863.5	898.7	922.9	990.6	993.4	977.6	951.7	948.8	931.5	925.7	917.5	915.8	915.4	914.9	913.8	908.3	906.7	892.2	797.1	688.8	0.00569257	1.0275e-06	0.00569154	5539.22	37.4345
190a	HU	2013	0.56	920.1	750	1015.6	890.6	937.5	992.2	797.4	878.7	913.2	976.5	969.1	944.1	925.1	922.4	914.5	915.6	916.7	916.6	915.2	912.5	909.8	905.2	900.3	887.7	795.4	621.5	0.00484398	7.49862e-07	0.00484323	6458.83	38.1015
190a	HU	2013	0.536	918.9	796.9	1015.6	890.6	929.7	992.2	840.2	887.9	917.2	967.7	979.2	975.7	953.3	925.7	919.7	918.1	915	911.9	907.8	906.4	903.1	900	896.7	890.8	822.9	636	0.00500052	1.33157e-07	0.00500039	37552.5	45.7464
190a	HU	2013	0.528	918.8	828.1	1937.5	906.3	945.3	1312.5	841.2	885.8	909	962.6	973.2	977.6	960.1	947.2	918.1	914.2	913.7	912.5	912.2	913.5	911.9	906.1	902.2	894.9	873.3	720.4	0.0110445	7.35252e-07	0.0110438	15020.4	41.7668
190a	HU	2013	0.52	920.3	820.3	1843.8	906.3	945.3	1203.1	808.1	889.9	910.6	976.8	997.8	981.8	969.8	961.9	929.9	919.1	915.6	918.2	917.4	915.6	911.6	908.5	906.2	896.7	870	765.1	0.00952954	1.27346e-06	0.00952826	7482.19	38.7403
190a	HU	2013	0.512	919.5	828.1	1960.9	906.3	945.3	1234.4	800.7	893	921.9	988.6	972.4	962	970.1	959.5	925.3	919.2	916.9	918.7	918.2	916.4	916	912.7	909.2	896.2	873.3	720.5	0.0102158	3.51822e-06	0.0102123	2902.68	34.628
190a	HU	2013	0.52	920.3	828.1	1968.8	906.3	953.1	1320.3	1187.4	878.6	903	982.6	1001.9	973	957.3	953.8	920.7	919.3	919.6	920.8	919.3	915.8	911.5	909	907.9	882.8	864.8	695.2	0.00995823	2.05125e-06	0.00995618	4853.7	36.8607
190a	HU	2013	0.576	919.9	820.3	1968.8	906.3	953.1	1296.9	571.8	864.8	893.3	994.8	996.9	966.2	957.5	949.3	919.1	916	915	912.6	910.5	905.9	905.3	908.4	900.6	859.6	718.7	1038.1	0.0100536	1.20831e-06	0.0100524	8319.34	39.2009
190a	HU	2013	0.536	918.3	820.3	1968.8	906.3	953.1	1414.1	832	881.1	909.3	934.1	979.7	964.5	949.6	944.2	917.1	913.5	910.2	908.1	908.5	909.8	908.7	907.9	905.6	898.4	873.7	755.7	0.0111034	8.71662e-07	0.0111025	12737.2	41.0507
190a	HU	2013	0.544	916.3	812.5	1960.9	906.3	953.1	1453.1	588.5	875.2	907.7	955.8	992.8	997	953.9	914.1	912.5	915.8	916.1	914.1	912.1	912.3	913.7	911.3	901.8	886	792.7	618.2	0.0104917	2.44742e-07	0.0104914	42867.2	46.3213
190a	HU	2013	0.52	919.8	828.1	1835.9	906.3	945.3	1234.4	831.3	892.5	910.9	981.6	992.4	984.9	972.5	955.4	921.7	922.9	920.2	919.9	920.1	919.4	918.1	914.5	910.3	902	884.3	757.3	0.011387	1.5875e-06	0.0113854	7171.94	38.5564
190a	HU	2013	0.552	916.4	812.5	1968.8	906.3	953.1	1382.8	557.4	873.1	900.3	974.6	1004.2	996.5	964.5	918.7	911	911.1	914	917.1	916.6	912	909.4	905.5	890.7	866	715.6	993.1	0.00948433	9.57816e-07	0.00948338	9901.04	39.9568
190a	HU	2013	0.552	921.7	820.3	1937.5	906.3	953.1	1250	821	882.2	931	994.2	1000.4	975.6	958.7	934.5	921.5	918	918	918.6	919.6	918	916.1	911.9	900.3	870.7	729.7	604.5	0.0109494	2.72068e-07	0.0109492	40244.2	46.047
190a	HU	2013	0.528	924.5	828.1	1820.3	906.3	945.3	1062.5	777.6	890.5	923.5	1006.8	987	996.8	940.2	926.3	920.3	913.8	907.3	911.5	913.8	911.4	907.7	903.6	901.5	888.8	858.5	687.8	0.0124036	1.19117e-06	0.0124024	10412	40.1753
190a	HU	2013	0.488	925.9	828.1	1820.3	914.1	953.1	1046.9	820	897.3	929.4	997.9	1021	1012.5	1001.8	986.8	939.9	927.1	919.7	919.5	916.9	914.9	912.9	909.8	905.3	900.6	881.5	766.2	0.0113009	1.50157e-06	0.0112994	7525.04	38.7651
190a	HU	2013	0.496	919.9	828.1	1820.3	906.3	945.3	1062.5	812.2	890.6	929.9	990.9	1025.2	1015.4	985.5	930.3	920.3	921.6	923.6	922.6	920	919.5	916	909.4	902	894.2	870.8	721.5	0.0130556	8.91551e-07	0.0130547	14642.7	41.6562
190a	HU	2013	0.512	916.2	820.3	1023.4	898.4	945.3	1226.6	800.6	885.5	910.7	980.4	990.3	989.3	972.3	922.5	910.2	914.3	919.1	919.8	918.2	918.1	913.8	911.5	906.7	893.9	863.4	728.2	0.0113663	4.80687e-07	0.0113658	23645	43.7374
190a	HU	2013	0.528	921.1	828.1	1039.1	906.3	945.3	1132.8	573	877.7	906.4	970.1	1002.5	1004.4	987.1	947.4	925.6	923	922.5	919.9	917	912.3	909.6	906.1	904.8	885.4	828.1	628.1	0.0119463	7.93214e-07	0.0119456	15059.7	41.7782
190a	HU	2013	0.552	918.1	820.3	1820.3	898.4	929.7	1265.6	830.8	872.8	895.7	904.6	906.9	914.6	931.3	928	916.7	910.3	907.4	906.6	898.7	897.4	896.8	898	902.6	902.7	877.6	765.8	0.0127859	1.04507e-06	0.0127848	12233.4	40.8755
190a	HU	2013	0.528	914.9	820.3	1015.6	906.3	945.3	1218.8	838.5	878.8	903.7	957.1	923.4	972.8	937.3	916.5	916.4	917.1	915.1	915.3	915.9	913.4	909.3	908	907.8	898.9	870.4	761.2	0.0131532	7.33799e-07	0.0131525	17923.8	42.5343
190a	HU	2013	0.512	919	820.3	1031.3	906.3	945.3	1171.9	801	889.6	915.6	977.7	993.4	997.4	971.9	936.5	920.6	913.6	911.1	912.2	911.6	911.5	911	911.7	907	898.6	874.8	757.2	0.0115913	6.4321e-07	0.0115907	18020	42.5576
190a	HU	2013	0.504	925.1	835.9	1031.3	914.1	945.3	1140.6	804.5	892.9	917.6	966.5	990.8	995.7	983.4	952.7	929.1	927.7	921.1	917.7	915.2	917.8	915.4	913.1	913	907.2	889.3	864.1	0.0137916	1.1113e-06	0.0137905	12409.4	40.9375
190a	HU	2013	0.536	921.3	835.9	1046.9	906.3	945.3	1039.1	592.3	874.2	914.5	971.9	1004.6	1007.6	968.7	942.4	924.9	924.5	921.8	921.2	918.8	918.2	916.2	912.8	910.8	893.1	793.2	621.2	0.0118666	6.08134e-07	0.011866	19512.2	42.9031
193a	HU	2013	0.504	1055.8	625	1773.4	1039.1	1109.4	1437.5	551.7	606.7	636.8	663.6	698.8	735	770.9	832.2	879.1	944.5	1021.1	1035.6	1039.8	1048.7	1054.8	1062.9	1059.2	1044.2	1041.9	1083.6	8.8554e-05	1.41677e-07	8.84123e-05	624.04	27.9521
193a	HU	2013	0.472	1060.3	859.4	1578.1	1023.4	1070.3	1210.9	682.4	700.6	735.7	770.1	823.9	871.1	908	1027.5	1037.4	1039	1040.7	1041.4	1049.2	1058.3	1063.4	1065.9	1059.3	1053.7	1055.5	1068	0.000120694	2.18281e-07	0.000120476	551.929	27.4188
193a	HU	2013	0.536	1059.7	890.6	1593.8	1031.3	1070.3	1351.6	535.1	575.1	659.3	679.3	715.7	742.7	750.2	832.8	1032.1	1037.9	1041.1	1036.5	1044.6	1048.9	1059	1065.7	1063.8	1058.6	1046.5	1064.5	0.000145421	3.28807e-07	0.000145092	441.268	26.447
193a	HU	2013	0.464	1075.9	984.4	1585.9	1046.9	1085.9	1320.3	691.6	726.1	764.1	809.3	1015.3	1035.5	1045.4	1049.7	1053.1	1060.2	1067.7	1073	1075.6	1079.1	1083.4	1087.4	1092.4	1081.7	1068.8	1092.9	0.000232678	1.68165e-07	0.00023251	1382.63	31.4071
193a	HU	2013	0.48	1071.1	984.4	1570.3	1046.9	1085.9	1351.6	638.8	677.1	661.8	737.4	765.3	802.3	1018.2	1036	1042.3	1047.2	1048.3	1055.5	1058.5	1063.5	1069	1067.4	1059.2	1069.9	1077.6	1102.3	0.000162683	1.99984e-07	0.000162483	812.48	29.0981
193a	HU	2013	0.44	1074.6	976.6	1562.5	1046.9	1085.9	1328.1	696	718.7	758.1	826.7	1023.9	1035.7	1045.9	1046.5	1049.8	1054.5	1056.9	1059.8	1066.4	1077.6	1086.4	1086.6	1081.1	1075.4	1060.7	1034	0.000216899	1.72882e-07	0.000216726	1253.61	30.9816
193a	HU	2013	0.448	1080.5	976.6	1578.1	1062.5	1093.8	1132.8	1497.7	1532.8	876.6	1056.5	1058.5	1058.2	1064	1070	1075.6	1084.3	1089.2	1093.8	1101	1110.9	1114	1112.8	1106.5	1103.3	1076.6	1094	0.000328806	1.68927e-07	0.000328637	1945.44	32.8902
193a	HU	2013	0.448	1086.7	976.6	1562.5	1054.7	1093.8	1132.8	1491.3	1039.5	1025.7	1044.6	1053	1064	1069.6	1077	1082.3	1092.8	1098.9	1100.2	1104.1	1104	1113.6	1115	1112.7	1108	1093.5	1055.4	0.000332503	1.40582e-07	0.000332362	2364.19	33.7368
193a	HU	2013	0.448	1078.8	976.6	1640.6	1054.7	1093.8	1203.1	1478.2	793	540.2	1052.6	1055.7	1060	1069.4	1073.9	1076.5	1082.8	1085.7	1084.5	1086.2	1091.2	1102.4	1102.4	1097.4	1091.3	1074.3	1045.3	0.000199408	1.75472e-07	0.000199232	1135.41	30.5515
193a	HU	2013	0.44	1080.4	968.8	1593.8	1054.7	1093.8	1210.9	742	764.2	1309.8	1045.8	1055.8	1059.2	1063.4	1067.6	1073	1078.8	1083.7	1088	1091.7	1100.6	1105	1100.8	1093.2	1092.7	1078.9	533.8	0.00029685	4.01843e-07	0.000296448	737.721	28.6789
193a	HU	2013	0.52	1074.7	617.2	1695.3	1046.9	1093.8	1414.1	578.1	628.4	665.4	708.6	749.4	531.1	1643.4	1030.3	1052	1059	1063.4	1070	1074.3	1077.7	1083.3	1082.4	1079.6	1082.2	1080.8	1089.3	0.000111928	2.22779e-07	0.000111706	501.419	27.002
193a	HU	2013	0.464	1080.5	976.6	1687.5	1046.9	1093.8	1406.3	667.6	719.2	778.9	813.1	1010.1	1028.3	1047.1	1054.7	1059.1	1072.5	1078.7	1078.8	1076.6	1078.3	1085.1	1093.2	1088.7	1087.8	1081.6	1060	0.000142655	1.60863e-07	0.000142494	885.812	29.4734
193a	HU	2013	0.496	1086.9	992.2	1687.5	1062.5	1109.4	1335.9	577.9	685.6	734.4	780.7	1025.2	1038.6	1054.2	1061.3	1073.9	1080.3	1087.1	1095.1	1102.6	1102.7	1105.3	1113.9	1120.1	1114	1101	1104.2	0.000150232	3.75704e-07	0.000149856	398.868	26.0083
193a	HU	2013	0.416	1048.3	976.6	1640.6	1039.1	1085.9	1414.1	629.6	642.9	675.5	709.8	726.6	751	741.9	1004.4	1026.6	1041	1045.9	1047.8	1044.3	1044.1	1054.8	1046.8	1040	1036.1	1047.1	972.3	0.000131166	1.72276e-07	0.000130994	760.374	28.8103
193a	HU	2013	0.464	1076	960.9	1578.1	1039.1	1085.9	1359.4	668.3	704.4	734.3	764.9	807.9	1020	1030.8	1041.1	1046.9	1051.5	1055.4	1061.1	1065.1	1067.9	1080.5	1085.4	1077.6	1067.6	1048.6	1069.4	0.000201643	1.71163e-07	0.000201471	1177.07	30.708
193a	HU	2013	0.432	1067.1	984.4	1554.7	1046.9	1085.9	1390.6	1321.9	686.8	723.2	754.1	789.1	814.7	1034.4	1043.6	1052.2	1056.7	1060.8	1068.2	1077.6	1082.5	1077.7	1067.2	1071.3	1071.4	1063.8	1050.7	0.000199263	5.09332e-07	0.000198754	390.224	25.9131
193a	HU	2013	0.456	1070.9	937.5	1609.4	1039.1	1085.9	1375	686.9	718.5	764.8	801.2	983	1030.5	1039.5	1046.6	1053.3	1061.2	1065.3	1069.8	1075.7	1081.1	1086.2	1080.2	1073.6	1075.5	1066.7	1070.2	0.000217273	1.58729e-07	0.000217114	1367.83	31.3603
193a	HU	2013	0.44	1073.9	953.1	1125	1031.3	1078.1	1117.2	1422.7	730.1	800	988.4	1021.8	1045.1	1050.8	1060.3	1064	1067.2	1071.6	1074.4	1076.6	1078.6	1082.8	1085.7	1080.2	1074.3	1053.1	1077.8	0.000159246	1.03931e-07	0.000159142	1531.22	31.8504
193a	HU	2013	0.464	1106	898.4	1601.6	1031.3	1085.9	1132.8	671.6	706	739.9	732	805.2	907.8	924.2	1030.1	1055.3	1080.5	1092.7	1099.2	1106	1110.9	1112.9	1115	1110.4	1114	1101.3	1064.2	0.000124629	1.58041e-07	0.000124471	787.588	28.963
193a	HU	2013	0.312	1079	898.4	1140.6	1007.8	1054.7	1093.8	913.5	931.8	990	1005.3	1013.1	1031.2	1047.3	1063.4	1076	1080.7	1086.8	1096	1101	1102.6	1103.5	1098.8	1099.2	1101.6	1095.5	1072.3	0.000133253	2.16361e-07	0.000133037	614.885	27.8879
193a	HU	2013	0.368	1080	898.4	1226.6	1015.6	1078.1	1125	746.2	718.4	781.9	809.6	896.7	934	970	1012.7	1046.7	1061	1078.3	1082.8	1093.3	1099.6	1103.7	1099	1098.2	1108.2	1108.9	1122.9	0.000107888	5.40346e-07	0.000107348	198.666	22.9812
193a	HU	2013	0.384	1072.5	882.8	1625	1000	1078.1	1148.4	701.8	723.2	744.4	763.1	801.4	809.1	896.5	922.1	984.6	1042.6	1068.2	1076.2	1081.2	1077.7	1069.5	1070.1	1073.9	1076.4	1086.3	1086.9	7.67781e-05	1.19691e-07	7.66585e-05	640.468	28.065
194a	HU	2013	0.472	970.4	773.4	1921.9	914.1	984.4	1703.1	801.1	827.1	857	874.2	885.6	896.1	902	908.7	917.9	926.4	943.8	952.6	963.5	964.2	970.3	973.3	976.4	979.2	922.4	838.1	0.000339613	7.9333e-07	0.000338819	427.085	26.3051
194a	HU	2013	0.48	960.8	765.6	1929.7	914.1	976.6	1734.4	807.3	833	863.7	876.3	887.2	896.7	909	918.8	926.5	930.7	939.1	946.5	953.8	955.6	959.7	962.4	964.5	970.1	922.2	808.8	0.000394799	1.44638e-07	0.000394654	2728.57	34.3593
194a	HU	2013	0.504	950.2	523.4	1929.7	882.8	968.8	1656.3	776.7	809.9	827.4	841.2	868.5	878.8	887.2	903.9	915.4	927.3	934.4	937.3	941.4	942.2	950.2	958.4	963.1	0	914.4	829.6	0.000293456	9.80178e-06	0.000283655	28.9391	14.6148
194a	HU	2013	0.512	952.8	554.7	1921.9	882.8	968.8	1648.4	772.2	801.8	827.5	843.2	861.4	869.6	882.7	888.9	895.9	902.9	908.1	914.7	916.2	926.6	936.3	941	951.3	960.1	917.6	821.1	0.000201582	6.45575e-07	0.000200937	311.252	24.9311
194a	HU	2013	0.48	954.6	734.4	1914.1	890.6	968.8	1570.3	768.9	802.6	826.2	843	858.5	872.3	878.6	893.7	902	908.2	915.9	925.5	931.7	942.6	950.1	955.8	960.4	966.7	954.6	868	0.000231753	7.44176e-08	0.000231679	3113.22	34.9321
194a	HU	2013	0.496	910.4	523.4	1875	843.8	929.7	1562.5	712.8	748.7	769.7	736.3	796.4	815.9	827.4	828.9	849.1	856.2	865.7	877.5	888.6	896.1	900.3	906.1	915.4	923	916.6	874	0.000134736	1.36594e-05	0.000121077	8.86403	9.47631
194a	HU	2013	0.568	908.1	515.6	1859.4	828.1	921.9	1398.4	991.7	531.4	615	544.7	715.3	734.8	765	783.7	791.9	812.5	825	837.5	848.3	863.4	874.9	878.4	888.2	913.9	938.8	1119.2	9.14392e-05	1.05775e-05	8.08617e-05	7.64468	8.83359
194a	HU	2013	0.512	903.7	656.3	1859.4	851.6	945.3	1437.5	664.4	699.5	726	501.4	967.4	778.7	799.4	809.8	817.1	832.1	841.1	854.9	861.9	866.7	883.7	892.4	900.2	915.5	910.8	817.9	0.000102594	4.31814e-06	9.82754e-05	22.7587	13.5715
194a	HU	2013	0.584	922	515.6	1875	867.2	953.1	1343.8	709.1	729.1	768.2	790.5	810.2	818.9	833.2	843.8	859.3	867.9	878	889.6	903.1	906.7	918.3	943.9	1119.6	997.8	992	944.1	0.000134999	1.74266e-06	0.000133256	76.4675	18.8348
194a	HU	2013	0.544	912.7	523.4	1859.4	867.2	945.3	1242.2	729.9	762	791.9	810	829.2	837.5	842.9	854	864.8	869.7	879.6	890.5	903.4	903.9	905.2	912.3	937.2	1141.9	526.2	958.9	0.000128789	5.33237e-06	0.000123456	23.1523	13.6459
194a	HU	2013	0.584	913.3	726.6	1867.2	859.4	945.3	1351.6	747.3	760.2	792.6	807.4	827.5	840.3	846.9	854.7	858.3	863	871.9	883	888.4	894.4	895.4	909.3	936	1162.8	1287.2	964.9	0.000118707	2.36972e-06	0.000116337	49.0931	16.9102
194a	HU	2013	0.496	913.8	718.8	1773.4	882.8	968.8	1109.4	737.4	772.9	796.8	811.5	839.2	854.4	867.4	871.2	892.5	899	905.9	921.5	935.7	946	963.8	991.5	1037.5	928.6	1052.8	998.1	4.71123e-05	5.38456e-08	4.70584e-05	873.952	29.4149
194a	HU	2013	0.52	914.6	734.4	1882.8	867.2	929.7	1304.7	756.3	783.9	808.5	828.3	844.1	859.5	869.8	877.2	894.5	899.3	907	916.9	928	931.6	934.8	943.5	951	962.1	942.5	931.3	7.80627e-05	1.21611e-05	6.59016e-05	5.41905	7.33923
194a	HU	2013	0.504	953.8	742.2	1921.9	890.6	968.8	1617.2	771.5	819.4	842.5	855	869.6	885.4	896.9	901.3	908.6	915.1	921.3	923.5	927.4	941.6	949.3	955.7	961	964.6	926.1	866.2	0.000217208	3.16252e-06	0.000214045	67.682	18.3047
194a	HU	2013	0.52	950.1	539.1	1929.7	882.8	960.9	1664.1	758.3	820.4	843	857.1	871.1	882.9	892.7	904	913.1	916.3	919	924.3	927.4	932.9	936.7	940.6	943.1	956.3	918.1	838.2	0.000210858	6.18514e-06	0.000204673	33.0912	15.1971
194a	HU	2013	0.608	935.1	546.9	1914.1	882.8	968.8	1656.3	772.2	820.4	840.5	855.8	874.5	885.5	891.6	902.4	909.5	920.7	929.2	934.8	936.7	938.5	942.9	939.8	893.7	551.4	575.5	548.6	0.000243707	1.68174e-05	0.00022689	13.4913	11.3006
194a	HU	2013	0.512	928.9	734.4	1906.3	882.8	953.1	1671.9	730.8	800.8	828.6	838.2	845.9	857.1	877.5	889.6	895.2	903.7	908.1	914.7	918.6	920.3	922.4	927.9	931.4	939.4	927.6	837.2	0.000273764	2.20754e-06	0.000271556	123.013	20.8995
194a	HU	2013	0.504	981.8	500	1828.1	843.8	953.1	1125	803.8	830.3	848.1	853	870.2	882	896.6	897.5	903.5	916.5	921.5	531.9	934.6	946.2	955.5	963.2	585.5	990.6	976.4	929.6	0.000259034	3.85795e-06	0.000255176	66.143	18.2048
194a	HU	2013	0.488	977	796.9	1820.3	906.3	968.8	1250	804.6	841.6	858.2	874.5	889.2	905.7	914.9	920.8	925.4	934.2	939.7	948.7	952.3	956.6	961.4	968.7	976.4	986.6	969.7	829.4	0.000210603	2.92016e-08	0.000210574	7211.05	38.58
194a	HU	2013	0.504	977	804.7	1828.1	906.3	968.8	1039.1	824.5	861.4	879.8	893.5	907.5	913.5	914.7	920.3	921.9	926.7	938.8	946.8	951.4	958.6	961.8	968.3	976.5	986.2	968.9	867.2	0.000247376	2.0478e-07	0.000247171	1207.01	30.8171
194a	HU	2013	0.488	982.4	789.1	1812.5	906.3	968.8	1289.1	800.7	842.5	862.1	870.1	882.2	902.3	912.9	918.7	922.7	929.1	933.8	940.7	950.8	957.5	968.2	973.2	982	991	976.5	963.9	0.000213136	1.72425e-07	0.000212964	1235.1	30.917
195a	HU	2013	0.416	1038.1	890.6	1867.2	984.4	1039.1	1414.1	901.8	902	957.2	982.9	996.6	1023.1	1038.1	1047.6	1044.9	1043.7	1036.2	1041.2	1036.6	1028.5	1026	1016.7	1008.9	990.7	999.9	986.5	0.000175889	1.16323e-07	0.000175772	1511.07	31.7929
195a	HU	2013	0.4	1034.1	890.6	1851.6	984.4	1031.3	1312.5	889.7	902.6	965.6	983.9	1009.7	1032.8	1044.7	1043.1	1044.4	1044.1	1041.3	1034.6	1032.7	1027.7	1022.6	1016.4	1004.1	991.7	962.1	985	0.000137501	3.53815e-07	0.000137148	387.625	25.8841
195a	HU	2013	0.424	1014.2	882.8	1851.6	968.8	1015.6	1445.3	900.7	898.9	946.4	966.6	986.5	1001.6	1010.6	1020.9	1019.4	1020.4	1021.3	1019.6	1013.8	1006.5	1008.3	1005.8	1002.9	990.1	1002.4	981	0.000102099	4.48336e-08	0.000102054	2276.27	33.5722
195a	HU	2013	0.424	1017.6	882.8	1812.5	968.8	1015.6	1203.1	883.3	900	953.2	974.8	999	1007.6	1022.5	1021.6	1023.9	1027.1	1026.2	1021.7	1018.7	1013.9	1006.5	1004.1	1003.2	988.2	878.8	980.7	0.00010667	4.57086e-08	0.000106624	2332.7	33.6786
195a	HU	2013	0.408	1017.2	882.8	1843.8	960.9	1015.6	1281.3	889.9	903.4	953.8	972.1	981.1	1005.6	1017.9	1020.5	1021.9	1025.6	1026.3	1025.8	1024.6	1019.3	635.6	1009.3	1003.2	993.2	894.7	985.8	0.000120493	4.23812e-08	0.00012045	2842.07	34.5363
195a	HU	2013	0.408	1015.6	882.8	1867.2	968.8	1015.6	1500	879.7	903.5	954	973.2	985.7	1011.9	1019.6	1018	1017.8	1017.5	1018.6	1022.8	1022	1020.7	1016	1005.1	1001	994.4	993.4	983.8	0.00014896	2.04103e-06	0.000146919	71.9829	18.5723
195a	HU	2013	0.416	1020.6	882.8	1867.2	976.6	1023.4	1460.9	879.8	903.8	958.1	975.3	989	1012.4	1026.2	1025.4	1024.3	1021.7	1019	1019	1017.7	1017.7	1012.1	1006.9	1005.9	996.5	894.7	987.3	0.000157944	4.4469e-08	0.0001579	3550.78	35.5032
195a	HU	2013	0.456	1045.7	875	1835.9	992.2	1046.9	1226.6	870.9	907.3	1004	987.3	1058.6	1063.6	1057.7	1051.9	1047.3	1046.8	1042.1	1035.4	1033.3	1026.7	1024.6	1023.4	901.8	1020.4	1014.9	887.8	0.000116506	4.72188e-08	0.000116458	2466.36	33.9206
195a	HU	2013	0.416	1021	882.8	1875	968.8	1015.6	1382.8	883.1	906.5	940.9	959.9	980	1017.6	1027.6	1028	1021.4	1017.5	1015.8	1013.3	1009.1	1007.6	1002.5	999.2	995.6	989.4	894.7	985.3	0.000197202	4.17125e-08	0.00019716	4726.64	36.7455
195a	HU	2013	0.416	1003.3	875	1867.2	968.8	1007.8	1453.1	879.9	907	950.1	966.8	979.5	1003.4	1014	1015.3	1010.6	1007.4	1004.8	1007.3	1006.2	1001.6	996.9	992.2	987.6	972.3	891.3	983.1	0.000167626	4.60204e-08	0.00016758	3641.43	35.6127
195a	HU	2013	0.424	995.7	875	1875	960.9	1007.8	1507.8	893	898.9	936.4	956.7	975.5	986.9	999.2	1002.2	1006.9	1010.4	1007.9	1009.7	1004.2	1000.8	997.4	995.1	992.9	987	894.4	978	0.00013099	4.56278e-08	0.000130944	2869.84	34.5786
195a	HU	2013	0.416	1020.4	882.8	1851.6	968.8	1015.6	1117.2	900.7	902.6	946.8	961.9	979	1005.4	1024.3	1026.2	1026.8	1021.5	1022.6	1018.2	1016.8	1013.8	1003.5	1001.4	998.9	992.9	897.8	990.4	0.000199742	4.65496e-08	0.000199695	4289.95	36.3245
195a	HU	2013	0.4	1004.8	882.8	1851.6	968.8	1007.8	1367.2	883.1	899.9	954.2	964.9	986.1	1011.2	1016.3	1015.4	1017.9	1017.4	1016	1012.8	1010.6	1002.8	1002.6	1002.1	1000.1	993	895.1	989.2	0.000188457	4.72402e-08	0.00018841	3988.34	36.0079
195a	HU	2013	0.4	1047.1	867.2	1835.9	984.4	1046.9	1398.4	864	903.1	984.5	959.9	1042.5	1054.4	1053.4	1055.8	1054.7	1052	1050.4	1048.3	1038.2	1030.5	1032.3	1029.5	1029.7	1024.4	985.5	1011.8	9.37359e-05	4.38322e-08	9.36921e-05	2137.52	33.2991
195a	HU	2013	0.408	1051.4	882.8	1835.9	984.4	1039.1	1085.9	890.2	903.6	960.3	987.6	1006.4	1036.9	1039.4	1057.6	1052.3	1046.8	1046.2	1040.5	1037.5	1025.3	0	1014.8	1009.6	991.9	993.7	987.4	0.000192133	4.5167e-08	0.000192088	4252.83	36.2868
195a	HU	2013	0.4	1047	882.8	1828.1	976.6	1039.1	1078.1	876.2	903.2	955.3	976	1012.9	1040.2	1047.3	1055.9	1047.6	1043.8	1041.6	1038.6	1035.6	1023	1018.1	1015.4	1007.8	992.9	898.4	989.3	0.000188754	4.20052e-08	0.000188712	4492.59	36.525
195a	HU	2013	0.4	1063.6	882.8	1109.4	984.4	1046.9	1093.8	868.1	899.4	952.7	973.9	1012.6	1052.7	1061.3	1072.8	1069	1066	1055.5	1040.9	1037.6	1031.4	1030.6	1022.2	1015.8	1002.3	894.2	991.9	0.000190844	4.51393e-08	0.000190799	4226.9	36.2602
195a	HU	2013	0.392	1068.1	882.8	1117.2	984.4	1046.9	1093.8	912.2	899	965.8	986.4	977.1	1054	1066.2	1073.6	1075.3	1072.2	1070.4	1064.5	1057.6	1046.1	1036.8	1028.6	1022.1	1015.4	897.6	1004.3	0.000209903	4.32616e-08	0.00020986	4850.96	36.8583
195a	HU	2013	0.384	1069.7	890.6	1117.2	992.2	1046.9	1093.8	875.6	899.1	978.1	1007.1	1046.2	1063.9	1076.4	1077.1	1076.8	1075.6	1072.7	1068	1061.5	1057.3	1043.8	1039.6	1025.7	1011.2	894.5	1002.1	0.000209183	4.75105e-08	0.000209136	4401.88	36.4364
195a	HU	2013	0.376	1069.8	898.4	1117.2	992.2	1046.9	1093.8	896.9	899.5	976.7	1027.8	1061.8	1074.4	1074	1074.4	1075.7	1075.5	1076.5	1073	1068	1059.3	1048.7	1035.8	1024.3	1006.3	893.9	1002.5	0.00024249	4.47493e-08	0.000242445	5417.85	37.3383
195a	HU	2013	0.352	1091.3	882.8	1140.6	1023.4	1078.1	1117.2	930.7	1051.3	1065.6	1077.4	1090.5	1098.1	1100	1100.3	1098.3	1094.1	1089.4	1088.2	1087	1082.5	1079.8	1076.8	1067.5	1058.3	1037.4	989.1	0.000175075	4.62208e-08	0.000175028	3786.79	35.7827
195a	HU	2013	0.368	1085.6	890.6	1828.1	1000	1062.5	1117.2	916.3	899.1	959.2	986.1	1032.9	1067.7	1058.2	1048.4	1040.6	1087.3	1095.7	1089.5	1075	1064.3	1051.6	1032.6	1017.5	989.8	893.6	987.7	0.00018247	4.30986e-08	0.000182427	4232.77	36.2662
195a	HU	2013	0.352	1064.9	875	1148.4	1000	1062.5	1109.4	890.1	903	975.6	1001.9	1048	1048.8	1053.3	1062.3	1043.1	1043.5	1098.2	1091.1	1080.5	1065.1	1051.5	1033.1	1014.4	993.7	960.2	990.9	0.00016646	3.6224e-08	0.000166424	4594.29	36.6222
195a	HU	2013	0.352	1083.2	875	1156.3	1000	1070.3	1117.2	916	898.5	963.8	987.8	980.7	990.1	1051.7	1072.8	1063.6	1044.9	1103.6	1096.8	1086.9	1066.9	1057.3	1037.2	1009.8	991.5	894.5	991.9	0.000156635	3.68534e-08	0.000156598	4249.21	36.2831
195a	HU	2013	0.344	1086.3	875	1812.5	992.2	1062.5	1117.2	889.9	903.1	960.2	980.9	978.5	1046.4	1047.4	1047.8	1046.6	1039.4	1097.4	1097.5	1082.9	1067.6	1057.1	1032.4	1011	991.4	894.1	990.2	0.000133818	3.99679e-08	0.000133778	3347.12	35.2467
195a	HU	2013	0.36	1084.8	882.8	1156.3	1000	1070.3	1117.2	879.5	902.8	966.7	1006.7	1040	1056.7	985.7	1025.1	1058.9	1039	1105	1094.3	1088.4	1073.2	1051.2	1029.8	1013.6	902.3	1007.3	983.8	0.000146432	4.99166e-08	0.000146382	2932.54	34.6724
195a	HU	2013	0.368	1083.6	875	1835.9	1000	1070.3	1125	894	901.3	905.2	984.3	1014.4	1047.6	1058	1035.7	1095	1065.4	1111.1	1103.7	1087.5	1073	1059.5	1029.8	1011.2	898.3	1009	977.9	0.000121122	4.829e-08	0.000121073	2507.21	33.9919
195a	HU	2013	0.352	1085	882.8	1156.3	1000	1070.3	1117.2	916.3	899	966.1	993.3	1042.5	993.5	1045.6	977.7	1075.6	1052.5	1104.2	1102.7	1093.7	1079.5	1060.9	1040.8	1004.6	898.9	879.1	982.9	0.000128672	3.95847e-08	0.000128633	3249.56	35.1182
195a	HU	2013	0.36	1086.4	875	1164.1	1000	1070.3	1125	903.3	898.2	958.3	989.6	1030.5	987.9	1044.9	1080	1064.7	1060	1044.4	1104.7	1094.7	1086.2	1056.1	1027.6	1007.8	964.6	1007.7	966.3	0.000115527	4.03305e-08	0.000115487	2863.52	34.569
195a	HU	2013	0.336	1111.5	875	1820.3	1000	1078.1	1140.6	885.9	898.9	961.7	985.8	1026.9	1047	967.1	1044.3	1057.5	1095.5	1051.2	1126.3	1120.6	1110.7	1085.2	1059.9	1036.1	905.6	937.2	986.4	0.000116805	3.8669e-08	0.000116766	3019.63	34.7995
195a	HU	2013	0.336	1109.6	875	1179.7	1007.8	1078.1	1132.8	871.9	898.9	977.7	1012.5	1068.1	1003	1074.6	1088.4	1096.1	1077.4	1048.8	1122.5	1116.9	1104.3	1085.5	1056.5	1027.7	992.5	879.4	989.9	0.000135028	3.56403e-08	0.000134993	3787.64	35.7837
195a	HU	2013	0.336	1090.7	875	1164.1	1015.6	1078.1	1125	928.7	903.3	1051.8	1063.5	1073.3	1067.6	1058.1	1069.8	1068.4	1061.9	1111.9	1096	1097.7	1089.5	1077.2	1063.1	1040.7	1021.2	962.5	1008.1	0.000113018	4.18166e-08	0.000112976	2701.7	34.3164
195a	HU	2013	0.376	1090.2	882.8	1828.1	1000	1070.3	1125	883.7	903.6	957	1001.3	973.3	1072.4	1042.4	1045.2	1038.2	1110.9	1106.4	1094.1	1087	1067.9	1059.6	1029.7	1010.7	979.3	887	979.4	0.000147282	4.62404e-08	0.000147236	3184.14	35.0299
195a	HU	2013	0.4	1072.5	875	1125	984.4	1046.9	1101.6	896.8	898.9	952.9	978.3	1017.9	1056.1	1016.6	1076.7	1080.2	1083.8	1084	1076.7	1073.2	1065.3	1058	1038.7	1031.8	1010.9	872.2	1007.5	0.000183419	4.26907e-08	0.000183376	4295.46	36.3301
195a	HU	2013	0.376	1073.3	890.6	1125	1000	1054.7	1101.6	890.7	958.1	985.4	1063.8	992.9	1077.1	1079.5	1084.3	1083.2	1079.1	1076.1	1068.2	1063.8	1054.4	1046.8	1038.4	1031.1	1013.2	988.2	1005.1	0.000202836	4.30851e-08	0.000202793	4706.79	36.7273
195a	HU	2013	0.376	1079.5	890.6	1140.6	1000	1062.5	1109.4	879.1	902.3	978	1042.9	987.2	1083.9	1092.5	1069.3	1086.4	1089.6	1084.3	1079.1	1073.3	1067.4	1059.8	1039	1031.3	1008.2	891.1	1005.7	0.000212338	4.83054e-08	0.00021229	4394.75	36.4293
195a	HU	2013	0.376	1079.9	890.6	1132.8	1000	1062.5	1109.4	871.8	901.7	973.4	1037	988.1	1046.7	1094.3	1091.4	1087.4	1083.1	1081.3	1078.8	1075.5	1068	1062.1	1037.4	1026.6	998.4	879.4	1000.8	0.000208993	4.67049e-08	0.000208946	4473.75	36.5067
195a	HU	2013	0.352	1090.5	890.6	1156.3	1007.8	1070.3	1117.2	879.6	902.8	978.3	1012.1	987	1011.3	1048.3	1050.1	1046.2	1044.7	1103.8	1106.8	1096	1087.3	1069.6	1054.7	1025.6	1004.8	984.2	1001.8	0.000177396	4.00059e-08	0.000177356	4433.25	36.4672
195a	HU	2013	0.344	1109.3	875	1179.7	1007.8	1078.1	1132.8	880	903	984.7	1041.7	1076	1064	1075.2	1093.6	1096	1086.2	1061.2	1117.1	1114	1101.5	1088.3	1068.8	1031	1003.7	883.5	1000.1	0.00014239	5.04309e-08	0.000142339	2822.46	34.5063
195a	HU	2013	0.336	1109.3	867.2	1179.7	1007.8	1078.1	1132.8	917.6	899	970.7	1008.6	973.7	1075.8	1065.8	1082.5	1078.3	1063.8	1121	1120.7	1114.8	1101.1	1088.3	1058.3	1032.8	1006.4	894.4	1002.1	0.000134666	4.01207e-08	0.000134625	3355.51	35.2576
195a	HU	2013	0.328	1101.9	867.2	1179.7	1000	1078.1	1125	893.8	903	980.9	1052	982.4	1074.6	1063.8	1105.9	1109	1063.5	1051.9	1112.2	1110.7	1093	1085.8	1059.9	1036.8	1013	894.6	1000.7	9.8576e-05	5.5356e-08	9.85207e-05	1779.77	32.5036
197a	HU	2013	0.472	911.5	742.2	1875	906.3	1265.6	1695.3	766.3	797	795.4	805.7	813.1	821.6	834.4	848.1	860.7	874.8	882.3	891.3	893.8	893.7	899.3	907.3	908.4	913.9	918	1100.8	0.000475859	9.90014e-06	0.000465959	47.0659	16.7271
197a	HU	2013	0.616	894.6	492.2	1882.8	867.2	1164.1	1664.1	504	628.8	574.8	639	786.5	783.2	791.9	808.9	823.3	835.3	847.1	862	866.4	871	878.4	891	891.4	894.6	922.9	655.3	0.000393517	1.17583e-06	0.000392341	333.671	25.2332
197a	HU	2013	0.464	917.4	531.3	1882.8	906.3	1218.8	1679.7	780.3	790.9	789.9	797.7	808.9	823.4	832.7	840.6	848.1	858.7	863.8	873.5	876.2	878.7	885.8	894.7	912	921.4	916.4	963.8	0.000429118	3.18813e-05	0.000397237	12.4599	10.9551
197a	HU	2013	0.44	963.2	773.4	1882.8	906.3	1109.4	1695.3	796.3	799.8	797.3	805.8	816.3	833.4	850.4	862.4	870.4	874.3	877	885	888.3	891.2	893.7	900.1	907.5	923.1	970.4	960	0.000454169	3.95314e-06	0.000450216	113.888	20.5648
197a	HU	2013	0.448	949.4	773.4	1914.1	914.1	1179.7	1679.7	790.4	797.5	793.9	800	812.9	832.8	843	852.3	860.7	872.6	880.6	883.5	890.5	891.7	897.6	909.1	940.3	944	947.3	983.8	0.000407496	1.77362e-06	0.000405722	228.754	23.5937
197a	HU	2013	0.432	914.8	765.6	1914.1	906.3	1257.8	1703.1	793.1	798	802.5	808.1	816.7	832.8	850.1	857.8	865.7	871.4	880	883	892.5	897.8	897.2	898	901	910.4	930.2	949.5	0.000452736	4.23701e-06	0.000448499	105.853	20.247
197a	HU	2013	0.432	917.7	765.6	1882.8	898.4	1335.9	1726.6	808.7	821.6	826.4	841.3	850.4	862.8	876.7	883.4	891.8	896.4	904.4	908.4	913.7	915.4	919.2	922.4	919.5	919	920.6	919.9	0.000467882	3.3044e-08	0.000467849	14158.4	41.5101
197a	HU	2013	0.44	911.9	757.8	1882.8	906.3	1093.8	1718.8	806.4	817.5	818.4	819.6	838.7	855.6	863	874.2	883.5	889.8	892.5	897.4	904.5	909.5	914.8	916.4	915.8	918.4	923.7	976	0.000449241	2.06429e-06	0.000447177	216.625	23.3571
197a	HU	2013	0.448	874.7	734.4	1859.4	882.8	1492.2	1695.3	786.1	796	799	802.4	811	823	837.5	847.4	857.7	864.8	874.9	876.9	881.6	882.2	880.9	884.8	889.2	1792.1	897.2	889.2	0.000350624	2.53222e-07	0.000350371	1383.65	31.4103
197a	HU	2013	0.456	884	757.8	1867.2	906.3	1570.3	1703.1	790.7	782.2	786.2	797.6	807.2	823.1	837.5	845.7	854.5	864.2	869.1	872	879.4	890.3	892.7	897.1	903.6	906.8	909.5	920.8	0.000440638	3.69744e-08	0.000440601	11916.4	40.7614
197a	HU	2013	0.44	926.5	781.3	1906.3	929.7	1382.8	1726.6	746.8	807	817.8	824.2	836.1	848.4	858.8	866.1	874.6	881.4	884.1	892.8	897.5	898.4	904.8	915.5	914.4	919.8	955	991.5	0.000594958	3.0508e-07	0.000594653	1949.17	32.8985
197a	HU	2013	0.408	917.2	765.6	1898.4	929.7	1250	1703.1	785	791.8	806.1	813	823	835.8	853.8	863.8	876.6	877.8	881.8	886.9	894.7	896.7	900.3	908.3	910.1	917.4	929.5	1122.3	0.000540548	1.13779e-07	0.000540434	4749.86	36.7668
197a	HU	2013	0.416	934.5	718.8	1906.3	906.3	1093.8	1687.5	791.6	756.3	809.5	817.4	824.3	839.7	855.3	864.5	872.3	883.7	889.7	896.7	900.4	901.7	906	910.7	912.3	920	940.6	974	0.000452871	1.33526e-07	0.000452738	3390.64	35.3028
197a	HU	2013	0.424	921.3	773.4	1890.6	898.4	1281.3	1710.9	803.9	808.8	815.4	823	834.2	845.1	859.7	870.7	879.6	888.1	890.8	893.6	897.9	899.3	897.5	897.2	903.2	910.1	931	930.9	0.000497514	6.339e-08	0.00049745	7847.45	38.9473
197a	HU	2013	0.432	902.2	750	1859.4	882.8	1484.4	1710.9	787.2	807.3	816.9	824.7	838.3	854.7	865.5	872.4	881.3	888.2	896.4	898.4	900.4	904.3	905.2	907.3	907.2	910.1	904.8	863.2	0.000538114	2.53925e-08	0.000538089	21190.8	43.2615
197a	HU	2013	0.416	927.7	765.6	1898.4	898.4	1492.2	1726.6	794.3	811.3	823.2	836.8	848.1	863.4	877.1	884	887.2	892.9	896.7	898.8	900	906.2	909.8	912.9	917.9	930.7	934.1	883.1	0.000590298	2.11967e-08	0.000590277	27847.6	44.4479
197a	HU	2013	0.416	904.8	757.8	1867.2	898.4	1578.1	1726.6	786.3	800	816.7	828.8	838.8	856.8	866.4	874.7	882.9	893.8	901	904.3	907.6	909.9	908.3	909.5	913.6	915.7	912	902.1	0.000556282	2.74288e-08	0.000556254	20279.9	43.0707
197a	HU	2013	0.424	906.6	796.9	1875	906.3	1601.6	1750	820.3	830.9	844.7	848.1	855.1	864.6	877	891.4	899.3	907.3	910	908.6	909.6	912.1	914.5	914.4	916.6	916.7	917.6	862.9	0.000647479	1.85277e-08	0.000647461	34945.5	45.4339
197a	HU	2013	0.416	919.2	789.1	1890.6	914.1	1632.8	1757.8	810.1	829.4	845.8	856.3	862.3	874.2	884.5	893.7	897.9	906.7	911.1	914.1	918.7	917.3	914.8	920.6	924.4	923.8	926.9	916.1	0.000720053	1.6808e-08	0.000720037	42838.8	46.3184
197a	HU	2013	0.408	892.7	773.4	1875	906.3	1609.4	1742.2	813	815.4	828.5	836.5	846.6	860.9	877.4	887	896.9	904.6	904.4	905.5	910.6	911.4	912.3	914.8	917.9	920	919.5	900.1	0.000588017	1.85717e-08	0.000587999	31660.9	45.0052
197a	HU	2013	0.384	925.8	765.6	1898.4	914.1	1578.1	1757.8	808.3	834	849.1	855.3	867.2	875	885.8	893.5	903.7	909	917.3	920.5	918.3	920.3	924.9	927.6	928.8	928.5	932.9	921.8	0.000626457	1.38115e-08	0.000626443	45356.6	46.5664
197a	HU	2013	0.4	927.7	781.3	1898.4	914.1	1578.1	1765.6	831.4	848	861.2	867.1	874.6	887.9	895.3	906.5	911.3	914.6	919.2	921.9	925.3	924.6	925.7	930.5	935.1	934.6	932.2	859.7	0.000676431	9.89786e-07	0.000675441	682.411	28.3405
197a	HU	2013	0.392	907.9	507.8	1882.8	882.8	1281.3	1703.1	531.5	810.4	825.1	833.3	849	862.6	877.2	887.7	892.8	897.9	900.7	906.8	909.1	907.5	909.7	913.1	913.3	914.9	923.7	908.6	0.000626608	3.41966e-05	0.000592412	17.3237	12.3864
197a	HU	2013	0.4	911.9	531.3	1875	875	1328.1	1710.9	780.9	809	826.1	835	850.9	865.8	876.6	887.5	898.5	901.7	900.6	903.5	909	910.3	909.3	911.7	913.5	916.3	921.5	899	0.000579964	2.26468e-05	0.000557317	24.6091	13.911
197a	HU	2013	0.384	911.9	750	1875	898.4	1390.6	1734.4	818.7	828.5	838.4	844.7	858.5	867.5	881.8	888.9	895.3	899.6	905.8	909	910	911.4	915.3	917.7	912.4	912.7	921.3	910.4	0.000609591	5.45721e-06	0.000604134	110.704	20.4416
197a	HU	2013	0.368	934.7	515.6	1921.9	906.3	1078.1	1734.4	822.2	837.6	851.3	868.1	878	892.2	898.2	901.2	907.5	910.8	915.4	917.9	918.2	921.8	932.5	935.3	929.6	937.3	948.9	871.7	0.000704594	1.57729e-08	0.000704578	44670.2	46.5002
197a	HU	2013	0.376	918.5	750	1882.8	898.4	1367.2	1734.4	809.2	834.8	847.5	857.6	863.6	875.9	886.3	896.4	901.3	906.8	908.4	914.3	914.7	914.7	918.1	924.6	925.9	921.9	920	903.4	0.000654137	2.68451e-05	0.000627292	23.3671	13.6861
197a	HU	2013	0.384	941.7	765.6	1914.1	921.9	1039.1	1703.1	814.6	838.4	851.9	859.4	877.2	887.6	898.8	905	909.4	911	915.3	920.4	923.4	922.3	924	932.4	940.5	937.9	967.9	951	0.000665898	1.83223e-05	0.000647575	35.3435	15.4831
197a	HU	2013	0.4	899.4	789.1	1867.2	898.4	1546.9	1742.2	816.6	822.1	838.1	848.6	861.9	874.9	881.6	893.3	900.7	903.9	907.1	908.3	910	909.2	907.6	909.2	910.4	911.1	913.5	890.2	0.000581022	1.91458e-05	0.000561876	29.3473	14.6757
197a	HU	2013	0.4	898.8	742.2	1867.2	898.4	1546.9	1734.4	1537.9	807.7	835.3	843.6	855.9	871.5	881.5	892.8	899.7	902.4	901.5	902.8	907.3	908.1	907.8	908.7	909.6	910.8	908.6	887.6	0.000663295	1.31958e-05	0.000650099	49.2654	16.9254
197a	HU	2013	0.376	922	578.1	1898.4	875	1140.6	1710.9	798.9	821.3	834.9	841.8	851.1	865.6	876.5	885.9	891.3	896	899	899.8	899.4	904.2	907.5	910.6	912.3	932.4	929.4	903.9	0.000641056	1.337e-05	0.000627686	46.9473	16.7161
197a	HU	2013	0.4	872.6	562.5	1820.3	867.2	1460.9	1687.5	770.1	790.2	808.6	816.4	828.9	843.8	851.7	862	871.5	876.2	881.2	884	888.6	889.9	884.6	882.3	885.7	889.8	891.3	870.8	0.000512498	1.02015e-05	0.000502296	49.2374	16.9229
197a	HU	2013	0.456	871.9	703.1	1851.6	867.2	1484.4	1671.9	763.6	769.2	766.1	777.4	788.4	801.8	812.4	828	841.4	850.7	859.1	866.1	871.9	871.4	872.9	875	874.5	875.3	886.5	900	0.000544191	2.01626e-05	0.000524029	25.9901	14.1481
197a	HU	2013	0.424	870.1	718.8	1820.3	867.2	1492.2	1687.5	777.7	802.4	814.1	819.1	831.3	841	852.2	862.7	869.6	875.7	878.6	883.1	884.6	885	881.7	881.7	883.8	883.6	888.3	880.5	0.000565566	8.51194e-08	0.00056548	6643.38	38.2239
197a	HU	2013	0.416	870.8	492.2	1820.3	851.6	1429.7	1664.1	728.9	770.8	785.6	796.7	803.9	819	833.1	846.8	855.3	865.4	869.7	874.7	878.9	883.3	881	882.4	883.6	885.3	886.8	878.1	0.000521594	3.58223e-06	0.000518011	144.606	21.6019
197a	HU	2013	0.4	870.4	734.4	1812.5	867.2	1531.3	1687.5	776.6	792.8	800.5	802.8	815.2	831.8	843.3	852.1	861.6	867.1	869.5	874	879.6	886	886.5	883.7	883	884.4	884.8	859.8	0.000516808	7.91758e-06	0.00050889	64.2735	18.0803
197a	HU	2013	0.408	873.3	734.4	1843.8	875	1562.5	1695.3	764.7	786.7	799.4	809.4	819.1	833.8	847.5	856.1	865.2	874.5	878.3	882.6	886.6	886.4	886.2	889.7	892.7	892	895.2	888.8	0.000571179	9.91266e-07	0.000570188	575.212	27.5983
197a	HU	2013	0.384	874.9	710.9	1843.8	875	1468.8	1695.3	771.2	792.5	808.1	817.9	833	844.4	860	867.2	870.9	874.8	882.7	887.5	888.9	890.4	892.7	894	893.4	895.9	904.2	894.3	0.00051995	4.81133e-08	0.000519902	10805.8	40.3366
197a	HU	2013	0.392	906.4	718.8	1867.2	875	1039.1	1679.7	786.7	808.4	824.7	835.6	847.4	856.2	868.7	881.2	886.3	892	895.2	897.7	896.4	896.7	899.9	902.6	901.7	904.7	917.5	835.8	0.000430401	8.59757e-08	0.000430315	5005.08	36.9941
197a	HU	2013	0.408	875.7	750	1828.1	867.2	1148.4	1671.9	778.9	793.4	813.4	825.5	832	845.2	858.5	867	878.3	887.5	890.8	893.7	895.1	895.7	893.3	891.8	892.5	895.6	894.9	871.5	0.000355531	6.27966e-06	0.000349251	55.6162	17.452
199a	HU	2014	0.472	1089.9	906.3	1164.1	1000	1062.5	1117.2	957.6	986.3	1012.8	1087.1	1073.6	1067.9	1098.9	1088.5	1074.5	1061.2	519.6	1031.1	1032.5	1032	1012	1003.8	991	980.2	973.9	952.8	3.71901e-05	1.62322e-06	3.55668e-05	21.9113	13.4067
199a	HU	2014	0.456	1087.6	890.6	1156.3	1000	1046.9	1101.6	944.4	985.6	1020.2	1074.6	1056.1	1059.3	1093.6	1086.5	1066.3	1055.6	1044.9	1033.1	1019.1	1007.5	998	1002.8	1004.7	993.6	981.5	961.4	0.000102078	2.48313e-06	9.95945e-05	40.1085	16.0324
199a	HU	2014	0.456	1088.2	898.4	1148.4	1000	1062.5	1109.4	965.3	1002.8	1077.9	1080.3	1064.2	1037.5	1083.1	1095.3	1080.5	1063	1052	1051.4	1046.4	1025.6	1014	1002.5	993.2	997.8	998.1	976.4	9.97684e-05	4.05045e-06	9.5718e-05	23.6315	13.7349
199a	HU	2014	0.464	1092.2	921.9	1164.1	1007.8	1070.3	1125	959.9	1004.5	1068.7	994.3	1097	1095.9	1058.6	1100.1	1096	1078.4	1057.8	1037.1	1021.1	518.7	1008.3	508.2	1000.4	988.2	982.4	958.8	0.00016934	1.01667e-05	0.000159174	15.6564	11.9469
199a	HU	2014	0.456	1069.2	898.4	1164.1	1000	1062.5	1101.6	942	1028.7	1060.1	1074.4	1087.2	1084.9	1027.9	1093.5	1079.9	1071.8	1064.4	1058.9	1050.4	1045.7	1037.7	1020.8	1013.1	1002.3	999.4	982.8	0.000230694	5.06384e-06	0.00022563	44.5571	16.4892
199a	HU	2014	0.472	1075.1	882.8	1156.3	992.2	1054.7	1101.6	928.8	999.9	1067.7	1085.7	1087.5	1082.7	1081.3	1092.2	1103.1	1086.5	1069.7	1058.4	1051.5	1043.8	1028.1	1017	1008.3	997.4	992.1	967.8	0.000201472	3.66507e-06	0.000197807	53.9708	17.3216
199a	HU	2014	0.472	1062.2	890.6	1156.3	1000	1054.7	1093.8	937.8	1028.6	1069.8	1064.1	1065.9	1076.5	1072.2	1085.6	1094.7	1082.9	1066.2	1055.3	1049.1	1040.3	1025.4	1015.7	1010	1001.8	998.9	984.9	0.000232109	7.84995e-06	0.000224259	28.5682	14.5588
199a	HU	2014	0.456	1069	906.3	1132.8	1000	1046.9	1085.9	907.2	984.8	1045.5	1058.2	1058.8	1053.5	1061	1077.4	1071.6	1059.2	1033.8	1018.9	1012.5	1003.6	1008.4	1008.1	989	978.5	976.3	959.6	0.0003719	8.20861e-06	0.000363692	44.3061	16.4646
199a	HU	2014	0.448	1064.5	906.3	1156.3	1015.6	1062.5	1101.6	903	983.5	1051.3	1073.9	1076.6	1094.2	1065.4	1052	1091.4	1088.9	1070.5	1056.4	1052.6	1046.7	1032.4	1021.3	1001.7	992.5	993.9	988.5	0.000436402	4.77153e-06	0.000431631	90.4596	19.5645
199a	HU	2014	0.432	1062.3	914.1	1140.6	1007.8	1054.7	1085.9	921.8	981.3	1022.7	1056.2	1058.8	1063.6	1066.2	1081.3	1071.3	1057	1043.1	1036.8	1035.2	1040	1040.8	1027.1	1013.2	1000.3	991.6	980.8	0.000744001	1.52567e-06	0.000742476	486.656	26.8722
199a	HU	2014	0.448	1062.5	906.3	1132.8	1007.8	1054.7	1085.9	907.1	984.7	1024.1	1054.5	1059.5	1053.3	1058.4	1079.2	1075.6	1058.8	1043.4	1033.6	1028.1	1029.6	1035.3	1027.2	1013.4	1004.9	997.7	984.4	0.000601222	2.76461e-06	0.000598458	216.471	23.354
199a	HU	2014	0.448	1063.9	906.3	1164.1	1015.6	1070.3	1109.4	901.9	998.1	1052.4	1079.2	1069.1	1066.7	1066.8	1065.9	1101.4	1087.8	1068.3	1051.5	1038.9	1036	1040.9	1035.6	1017.6	1008.1	998.2	983.6	0.000778704	4.63396e-06	0.00077407	167.043	22.2283
199a	HU	2014	0.456	1069.7	906.3	1179.7	1015.6	1062.5	1101.6	898	1031.2	1085.7	1083.5	1102.3	1103.9	1072.8	1065	1105	1096.9	1077.6	1055	1039.3	1031.7	1027.1	1030.5	1027	1010.8	1001.1	982.4	0.000614308	3.44528e-06	0.000610863	177.304	22.4872
199a	HU	2014	0.448	1076.1	898.4	1164.1	1015.6	1062.5	1101.6	902.1	986.6	1053.6	1078.5	1087.4	1117.6	1093.9	1075.2	1064.9	1103.1	1084.1	1065.8	1045.5	1035.2	1040.8	1034.1	1018.2	1012.5	999.8	982	0.000479118	2.01839e-06	0.000477099	236.377	23.736
199a	HU	2014	0.448	1076.9	906.3	1164.1	1015.6	1062.5	1109.4	951.1	985.7	1052	1082.1	1074.8	1097.5	1094.4	1068.3	1092.5	1093.7	1085.2	1074.9	1060.3	1044.4	1029.1	1016.6	1010.3	1015	1015.6	988.9	0.000575979	1.37885e-06	0.0005746	416.723	26.1985
199a	HU	2014	0.456	1070.9	906.3	1156.3	1015.6	1062.5	1101.6	895.1	993.3	1050.1	1075.3	1076.7	1092.4	1078.3	1066.1	1100	1085.9	1068.9	1054.4	1054.3	1055.1	1040.7	1022.7	1010.1	999.7	993	980.4	0.000628364	3.07593e-06	0.000625288	203.284	23.081
199a	HU	2014	0.456	1069.7	906.3	1171.9	1015.6	1062.5	1109.4	883.6	1001.5	1053.9	1083.2	1088.1	1093.9	1098.3	1073.7	1106.7	1097.9	1077.6	1056.6	1037.9	1023.9	1029.2	1028.8	1017.3	998.7	996.5	976.1	0.000707731	4.72107e-06	0.00070301	148.909	21.7292
199a	HU	2014	0.456	1076.4	906.3	1164.1	1015.6	1062.5	1109.4	879.1	1009.9	1080.3	1065.4	1099.8	1112.8	1103.1	1071.7	1093.5	1095.1	1079.2	1055.7	1032.6	1017.5	1010.7	1015.2	1018.1	1008.5	997.1	978.2	0.00025175	1.84088e-06	0.000249909	135.756	21.3276
199a	HU	2014	0.464	1067.1	890.6	1148.4	992.2	1046.9	1085.9	921.2	975.2	1018.2	1058.8	1053.2	1052.2	1053.8	1068.2	1086.7	1069.9	1055	1046	1035.1	1031.6	1031.9	1025.4	1012.6	1000.7	989.6	965.9	0.000681149	4.84227e-06	0.000676307	139.667	21.4509
199a	HU	2014	0.464	1064.5	898.4	1179.7	1015.6	1062.5	1109.4	921.9	1015.2	1061.7	1068.3	1082.1	1083.9	1068.8	1098.8	1101.1	1095.2	1085.8	1067.2	1053.6	1044.6	1039.9	1040.3	1039.5	1034.1	1026.2	1006.8	0.000753256	8.36195e-06	0.000744894	89.0814	19.4979
199a	HU	2014	0.44	1066.1	898.4	1171.9	1023.4	1070.3	1109.4	960.9	1008.5	1076.5	1093.3	1081.8	1086.8	1075.5	1070	1095.5	1106	1093.9	1077.2	1062.3	1051.7	1048.9	1053.3	1053.3	1045.9	1035.5	1014.2	0.000784573	2.8203e-06	0.000781752	277.188	24.4277
199a	HU	2014	0.456	1070.4	898.4	1156.3	1015.6	1062.5	1101.6	863.2	1008.4	1065.4	1060.1	1069.6	1075.1	1077.5	1073.8	1104.1	1093.1	1074.5	1059.4	1045.4	1039.7	1045.9	1044	1035.9	1026.1	1017.7	996.9	0.000589065	6.57383e-06	0.000582491	88.6076	19.4747
199a	HU	2014	0.448	1072.2	898.4	1179.7	1023.4	1070.3	1117.2	925.6	1009.7	1082	1094.8	1115.4	1132.7	1125.9	1107	1069.2	1108	1098.8	1082.8	1070.7	1062.4	1061.5	1055.9	1041.5	1029.6	1021.6	1006.5	0.000590671	1.59066e-06	0.000589081	370.336	25.686
199a	HU	2014	0.44	1069.7	898.4	1148.4	1015.6	1062.5	1101.6	898.8	985.6	1044.7	1022.6	1066.3	1081.2	1067.9	1078.9	1103.4	1093.4	1084.5	1070.9	1053.8	1038.7	1026	1015.5	1008.4	1006	995.9	979	0.000525932	1.36782e-06	0.000524564	383.503	25.8377
199a	HU	2014	0.448	1074.5	906.3	1148.4	1015.6	1054.7	1093.8	898.6	986	1051.1	1078.1	1078	1073.1	1092.6	1092.5	1086	1073.9	1062	1051.8	1043.3	1036.2	1037.6	1036.3	1025.6	1018.9	1007.9	982.7	0.000967953	3.96616e-06	0.000963987	243.053	23.857
199a	HU	2014	0.456	1075.3	906.3	1156.3	1007.8	1062.5	1093.8	871.9	999.8	1059.6	1080.5	1076.3	1101.3	1084.1	1066.6	1094.6	1081.7	1074.5	1070.7	1063.7	1051.2	1037.2	1024.7	1017.3	1015.8	1021.3	999.9	0.00092271	9.76348e-06	0.000912946	93.5063	19.7084
199a	HU	2014	0.44	1064.7	906.3	1164.1	1023.4	1070.3	1109.4	968.5	1023.9	1076	1094.6	1097.5	1112.1	1095.5	1074.3	1112.5	1106.5	1096	1079.7	1063.5	1056.2	1054.6	1056.1	1050	1040.1	1029.1	1004.5	0.000633014	1.88168e-06	0.000631132	335.408	25.2557
220b	HU	2013	0.552	855.6	687.5	1851.6	859.4	976.6	1640.6	754.1	796.3	803.1	812.2	822.7	836.3	839.9	839.7	850.6	853.3	859	863.4	865.9	861.3	858.1	859.5	866.2	873.4	899.7	882.5	0.00270731	1.78783e-07	0.00270713	15142	41.8018
220b	HU	2013	0.552	883.5	726.6	1882.8	882.8	960.9	1625	773.7	837.2	844.9	854.4	870.4	882.9	886.2	887.9	889	886.9	887.7	895.9	898.6	896.1	896.1	898.9	902.2	922.4	967.1	956.6	0.00276382	1.13566e-07	0.0027637	24335.7	43.8624
220b	HU	2013	0.528	879.4	742.2	1859.4	882.8	960.9	1601.6	793.4	855.3	862.7	869.4	875.1	879	883	891.1	888.4	882.4	888.8	886.5	889.5	890.6	887.7	894.4	901.2	918.9	956.9	915.6	0.0022498	7.26126e-07	0.00224907	3097.36	34.9099
220b	HU	2013	0.544	861.5	625	1843.8	859.4	968.8	1593.8	738.5	775.1	796.7	811.7	831.5	839.8	848.7	849	849.3	858.5	865.4	862.2	860.1	865.5	869.2	864.3	868.3	878.3	908.5	978.5	0.000999479	6.02725e-07	0.000998877	1657.27	32.1939
220b	HU	2013	0.512	916.7	781.3	1875	890.6	945.3	1351.6	804.7	869.1	879.9	891.4	906	915.8	921.7	917.5	911.3	912.3	913.8	916.9	922.3	922.7	923.8	924.8	920.6	923.6	959.1	932.1	0.00312769	1.25996e-07	0.00312756	24822.8	43.9485
220b	HU	2013	0.56	920	609.4	1890.6	898.4	1078.1	1656.3	664.8	803.3	820.6	831.2	838.9	844.2	860.7	867.7	862.2	862.6	862.7	868.2	874.2	876.8	880.8	892.3	897.7	915.3	936.6	912.3	0.00183355	2.58165e-06	0.00183096	709.222	28.5078
220b	HU	2013	0.536	906.2	781.3	1843.8	898.4	976.6	1375	789.5	850.9	859.5	873.2	880.5	890.6	897.3	900.1	898.1	903.8	903.6	907	907	902.3	900.9	902.4	899.1	910.3	977	911.3	0.00255042	2.39968e-07	0.00255018	10627.1	40.2642
220b	HU	2013	0.488	939.1	820.3	1859.4	921.9	968.8	1164.1	836.8	912.7	919.3	930.8	945.6	946.7	945.8	952.6	949.7	949.3	952.4	952.1	941.9	941.4	941	936.5	938.9	945.2	962.7	991.8	0.00447135	2.39008e-07	0.00447111	18706.9	42.72
220b	HU	2013	0.496	942.4	828.1	1250	937.5	984.4	1132.8	847	914.6	921.5	925.6	943.9	947.5	947.1	949.7	951.6	949.7	952.1	952.1	956.9	958.9	963.1	965.3	966.3	971.4	993.7	973.6	0.00728437	4.70024e-07	0.0072839	15496.9	41.9024
220b	HU	2013	0.48	962.4	843.8	1054.7	945.3	984.4	1046.9	863.2	930.8	945.2	956.8	971.4	978.7	976.3	974.1	970.2	952.4	949.5	950.3	953.3	955.2	959.5	966.9	975.6	990.3	1004.4	997	0.0069678	1.69179e-07	0.00696763	41185	46.1474
220b	HU	2013	0.48	936.9	812.5	1867.2	914.1	968.8	1234.4	865.8	888.6	896.1	906.8	917.8	918.2	922.9	925.3	925.4	929.2	931.4	929.7	931.9	933.8	934.9	935.3	933.8	939	963	946.9	0.00406536	2.37698e-07	0.00406512	17102.1	42.3305
220b	HU	2013	0.496	938.6	820.3	1835.9	921.9	968.8	1140.6	857.9	884.7	898.2	907.6	919.8	925	929.7	930	934.9	938.8	938.6	940.8	934.2	932.5	937.1	939.5	942.9	952.8	971.1	945.5	0.00493321	1.58001e-07	0.00493305	31221.6	44.9446
220b	HU	2013	0.496	959.8	828.1	1085.9	929.7	976.6	1039.1	873.7	924.8	936.7	948.2	967.9	967.8	969.5	966.7	967.8	965.4	963.1	963.5	964.8	967.7	970.1	963.6	969.2	983.5	1032.9	980.9	0.00318993	2.45447e-07	0.00318968	12995.4	41.1379
220b	HU	2013	0.496	958.3	781.3	1828.1	906.3	968.8	1062.5	844.5	873.2	886	896.6	914.8	918.3	919.3	925.1	935	934.7	933.4	936	935.8	939	945.1	947.8	962.7	986.6	1034.7	997.6	0.00223212	2.89543e-07	0.00223183	7708.13	38.8695
220b	HU	2013	0.488	948.5	812.5	1835.9	921.9	976.6	1062.5	858.8	895.9	908.3	920.3	937.6	948.4	956.1	955.2	948.9	948	951.5	959.9	963.3	966.2	962	960.4	967.7	983.7	1015	995	0.00433101	1.30126e-07	0.00433088	33282.3	45.2221
220b	HU	2013	0.48	964	851.6	1085.9	945.3	984.4	1046.9	855.9	942.3	954.5	969.5	975.8	973.1	980.1	975	967.3	973.3	978.1	977.8	968	960.9	963.9	970.4	979.5	993.5	1020.1	997.7	0.00541963	3.8027e-07	0.00541925	14251.1	41.5385
220b	HU	2013	0.504	975.6	859.4	1101.6	953.1	992.2	1054.7	859.1	944.3	961.8	975.7	983	984.3	983.9	987.9	984	980.4	983.5	985.1	986.7	983.9	981.5	980.3	991.8	982	987	988.4	0.00552022	1.15842e-07	0.0055201	47651.9	46.7808
220b	HU	2013	0.48	1005.3	859.4	1078.1	960.9	1007.8	1046.9	855.5	968.1	1002.2	1016	1024.1	1019.9	1015.3	1001.3	1007.8	1001.6	997.4	995.2	996.1	991.5	989.3	991.5	994	1000.8	1021.5	945.4	0.0048377	9.2672e-08	0.0048376	52201.4	47.1768
220b	HU	2013	0.48	979.9	851.6	1046.9	953.1	992.2	1062.5	874.8	955.9	971.6	988.2	998	990.9	979	980.5	988.1	996.7	993.5	986.3	988.7	990.3	987.7	984.6	986.8	999.5	1004.3	987	0.00615077	5.05103e-07	0.00615026	12176.2	40.8551
220b	HU	2013	0.512	959.2	835.9	1875	937.5	984.4	1414.1	871.7	887.4	890.7	901.6	906.1	908.6	915	919.4	922	921.6	921	926.3	929.3	932.6	938.6	941.1	944.9	959.4	972.7	1004	0.00580811	1.85457e-07	0.00580792	31316.8	44.9578
220b	HU	2013	0.464	988.8	898.4	1062.5	968.8	1000	1054.7	864.1	969.9	984.5	989.7	993.4	996	997.8	1000.6	1002.6	1001.5	999.7	997.8	995.9	994.1	996	997.7	997.1	994.6	996.4	998.5	0.0175468	2.35735e-07	0.0175466	74433.6	48.7177
220b	HU	2013	0.496	966.7	875	1062.5	953.1	984.4	1046.9	870.9	948.9	956.8	960.4	974.3	977.4	977.8	979.1	986	987.7	983.8	981.5	980.8	974.6	973.9	979	980.8	988.9	1003.9	703.6	0.00968546	2.82606e-07	0.00968517	34271	45.3493
220b	HU	2013	0.48	1012	890.6	1093.8	968.8	1007.8	1046.9	871.3	976.4	1013.4	1025.6	1021.2	1017.9	1005	1001.1	996.2	997.7	995.1	988.7	982.4	986.8	991.4	993.1	996.8	1002.2	1014	1008.2	0.00716858	3.1631e-07	0.00716826	22662.2	43.553
220b	HU	2013	0.488	977.8	882.8	1078.1	953.1	992.2	1039.1	882.3	958.8	973.2	979.8	989.7	990.7	982.4	982.9	982.2	981.9	981.7	981.1	982	980.3	981.7	983.1	985.9	993.4	976.2	988.2	0.00717298	4.51127e-07	0.00717253	15899.1	42.0137
220b	HU	2013	0.456	967.8	859.4	1062.5	945.3	984.4	1054.7	852.5	936.3	950.9	954	969	971.5	973.4	977.5	982.2	980.8	982.6	977.4	976.1	977.9	979.6	979.4	978.6	982.8	991.3	1016.6	0.00931674	2.62087e-07	0.00931648	35547.3	45.5081
229c	HU	2014	0.728	889.9	539.1	1859.4	867.2	1039.1	1484.4	927.9	505.8	563	617.1	659.3	676.6	693.8	709.5	718.2	728.8	741.8	760.4	779.8	789.3	800.7	801.9	843.8	891.2	910.9	966.3	3.96282e-05	7.97585e-08	3.95484e-05	495.852	26.9535
229c	HU	2014	0.712	847.9	546.9	1843.8	890.6	1234.4	1539.1	953.5	527.9	596.7	656.5	682.8	711.9	726.4	742.1	761.6	769.8	775.8	789.5	800.8	801.7	818	849.6	855.2	864.6	898.6	1297.7	5.95815e-05	8.84631e-08	5.9493e-05	672.518	28.277
229c	HU	2014	0.712	900.7	585.9	1843.8	890.6	1039.1	1421.9	1288	991.9	591.2	640.2	673.3	721.6	741	757.7	771.1	779	789	806.7	820.7	830	848.5	861.7	886.8	903.7	906.1	524	5.58375e-05	1.08583e-07	5.57289e-05	513.239	27.1032
229c	HU	2014	0.608	903.4	617.2	1859.4	898.4	1054.7	1492.2	531.5	1273.2	678.9	717.1	740.8	762.4	774.7	786.7	799.2	813.5	822.4	835.4	838.7	859	864.9	874.7	891	898.5	910.3	998.6	9.89982e-05	3.98913e-08	9.89584e-05	2480.7	33.9457
229c	HU	2014	0.624	901.1	703.1	1882.8	906.3	1062.5	1414.1	536	1319.9	710.6	750.3	769.7	781.6	797.9	810.7	822.3	827.6	845.2	849.6	866	883.3	894.2	911.5	922.7	926.8	959.2	914	0.000113073	3.96366e-08	0.000113033	2851.74	34.5511
229c	HU	2014	0.6	1140.5	750	1851.6	929.7	1101.6	1250	1071.3	652.7	716.7	744.2	764.7	788.3	802.8	813.5	828.4	840.3	842.6	850.9	868.3	878.2	887.2	896.1	904.1	941.3	1136.4	971	0.000134491	1.17605e-07	0.000134374	1142.59	30.5789
229c	HU	2014	0.6	949.4	734.4	1890.6	914.1	1062.5	1421.9	1079.8	679	744.1	767.9	788.7	806.2	824.2	837.5	841.8	852	865.9	878.5	889.2	894.1	902	918.6	929.2	948.2	970.3	971.6	0.000181155	1.59483e-07	0.000180995	1134.89	30.5495
229c	HU	2014	0.536	951.1	726.6	1890.6	906.3	1015.6	1375	687.9	754.3	780.7	798.4	822	825.6	837.8	844.7	853.4	863.5	879.6	889.7	895.5	902.7	909.8	917.3	928.8	947.7	973.9	928.9	0.000126447	3.83884e-08	0.000126409	3292.88	35.1758
229c	HU	2014	0.616	935.6	625	1890.6	882.8	992.2	1492.2	534.2	1293.7	682.9	721.4	767.9	794.9	595.9	824.9	833.3	841	852.3	869.3	882	893.8	899.9	901.9	918.1	927	934.8	1249.2	6.84515e-05	3.70036e-07	6.80815e-05	183.986	22.6478
229c	HU	2014	0.56	945.7	703.1	1890.6	906.3	1031.3	1445.3	602.3	659	720.2	754.1	776.7	800.8	821.8	839.8	852.6	872	880.7	893.2	900.6	907.7	920.5	926.1	931.6	938.6	954.8	1311.2	8.21652e-05	6.58636e-08	8.20993e-05	1246.5	30.9569
229c	HU	2014	0.56	959.9	750	1882.8	921.9	1015.6	1460.9	620.9	664.3	769.2	791.2	831.1	849.2	868.9	877.7	890	905.1	911	926.1	938.8	947.5	948.9	947	952.2	955.5	968.2	1029.7	0.000157212	4.2045e-08	0.00015717	3738.13	35.7265
229c	HU	2014	0.576	952.4	765.6	1867.2	921.9	1007.8	1343.8	629.3	1322.9	812.9	845.7	856.4	875.5	883.3	889.9	902.5	912.4	915.8	923	931.7	935.5	941.9	944.2	951.3	952.4	963.2	956.7	0.000136199	4.64488e-08	0.000136153	2931.24	34.6705
229c	HU	2014	0.624	948.9	750	1843.8	906.3	1000	1453.1	541.4	659.8	769.5	802.3	819.7	838.8	848.9	859	872.5	882.4	892.4	899.6	909.1	921.3	924.8	927.2	933.6	941.6	946.8	970.7	0.000189278	1.15661e-07	0.000189162	1635.49	32.1365
229c	HU	2014	0.568	952.1	742.2	1906.3	906.3	1000	1632.8	601.9	738.1	776	794.4	825.4	843.7	861.2	876	885.1	899.2	909.4	917.5	923.8	927.9	933.8	937.9	940.7	949.1	958.7	1010.4	0.000169384	6.82157e-08	0.000169315	2482.06	33.9481
229c	HU	2014	0.568	951.7	757.8	1890.6	914.1	984.4	1468.8	524.1	655.5	783.8	824	838.1	854.5	870	876.1	884.3	898.7	906.6	914.3	920.7	924.3	934.5	935.6	938.3	946.1	955.3	972.3	0.000153606	1.01062e-07	0.000153505	1518.92	31.8153
229c	HU	2014	0.6	934.5	742.2	1898.4	898.4	1031.3	1601.6	539.1	659.4	788.1	819	834	848.4	864.9	876.5	873.2	880.6	887.1	892.6	902.2	907.2	908	907.2	911.7	920.1	937.7	966.4	0.000132825	7.7799e-08	0.000132747	1706.28	32.3205
229c	HU	2014	0.592	946.7	640.6	1890.6	898.4	992.2	1460.9	530.6	0	686.7	784.2	814.1	839.1	845.5	857.7	864.7	872.7	875	887	897.2	906	912.2	919.7	929	936.6	958.6	958.2	8.20381e-05	4.20716e-08	8.1996e-05	1948.96	32.898
229c	HU	2014	0.616	950.6	742.2	1890.6	890.6	976.6	1476.6	531.6	661	769.6	807.2	837.4	850.3	871.6	874.9	882.8	889.2	896.5	903	910.4	918.6	926.9	931.6	936	939.6	952.4	955.2	5.81928e-05	1.00495e-07	5.80923e-05	578.064	27.6198
229c	HU	2014	0.56	950.8	750	1898.4	906.3	1000	1562.5	660.1	770.8	796.5	816.6	828	851.9	863.6	870.8	882.5	895.5	904.3	912.8	923	930.4	937	940.9	946.9	949.3	955.3	956.4	0.000105411	1.17831e-07	0.000105294	893.6	29.5114
229c	HU	2014	0.608	956	757.8	1898.4	921.9	1054.7	1546.9	542.7	1364.1	799.9	826.3	845	863.9	873.1	880.6	890	899.2	906.5	917.6	918.9	927.1	933.8	941.5	951.2	960.2	966.9	1086	0.000152502	1.77511e-07	0.000152324	858.112	29.3354
231b	HU	2013	0.616	921.9	742.2	1898.4	882.8	953.1	1601.6	749.1	771	794.3	841.6	858.5	873.5	882.2	885.8	889.6	897.9	902.1	903	903.2	908.2	913.6	913.5	926.2	944.8	949.6	946.6	0.00115562	3.19211e-06	0.00115243	361.024	25.5754
231b	HU	2013	0.624	936.2	765.6	1835.9	867.2	937.5	1343.8	769.3	808.2	825.6	841	868.3	894.2	910.1	908.6	900.5	898.4	897.8	888.5	899.3	902.5	906.1	912.8	923.3	936.6	944.6	958.7	0.000364677	3.28076e-06	0.000361396	110.156	20.4201
231b	HU	2013	0.608	915.9	726.6	1843.8	843.8	921.9	1210.9	742.1	756.7	781.3	830.6	861.3	881.1	886.4	898.4	908.4	907.4	911	916.5	921	923.4	925.2	933.2	950	952.8	948.2	947	0.000269792	2.86193e-06	0.00026693	93.2692	19.6974	-20
231b	HU	2013	0.632	911.1	750	1843.8	843.8	906.3	960.9	760.9	777	796.9	831.5	863.3	884.4	899	903.5	905.3	904.3	905.6	900.6	897.2	900.6	898.6	888	901.1	929.8	925.2	903.5	0.000323289	1.73205e-06	0.000321557	185.652	22.687	-10
231b	HU	2013	0.6	910.7	757.8	1843.8	851.6	914.1	968.8	754.4	802.5	823.3	854.1	875.4	897.8	899	901.8	898.1	896.3	903.6	907.3	906.3	910.5	909.7	909.1	915.2	940	887.9	848.7	0.000378015	1.66658e-06	0.000376349	225.821	23.5376	-20
231b	HU	2013	0.584	938.7	765.6	1898.4	898.4	953.1	1507.8	762.5	789.2	811.8	862	886.7	933.6	928.9	926.8	922.7	936.9	943	941.6	940.7	944	944.9	953	968.6	941.9	894.6	887.1	0.00073324	2.32577e-06	0.000730914	314.268	24.973
231b	HU	2013	0.584	923.5	781.3	1710.9	882.8	929.7	984.4	788.1	810.5	845	860	894.6	913.1	921.6	921.5	922.4	924.4	928.6	924.4	924.9	926.4	924.6	932	951.7	957.4	963.2	938.7	0.000892663	4.43186e-06	0.000888231	200.419	23.0194
231b	HU	2013	0.544	920	773.4	984.4	867.2	921.9	953.1	772.7	802.4	850.5	886.2	901.4	908.4	909.9	919.7	920.7	916.2	919	924.4	927.4	925.3	914	912.9	938.5	919	842.9	920.7	0.00039898	1.21517e-06	0.000397764	327.333	25.1499
231b	HU	2013	0.464	923.7	789.1	992.2	898.4	929.7	960.9	826.6	834.7	885.5	895.3	908.1	917.9	925.1	928.6	932.8	928.8	936	933.3	922.4	919.5	922.5	931.7	951.1	933.1	913.7	936.3	0.00018081	8.95334e-07	0.000179914	200.947	23.0308
231b	HU	2013	0.552	931.9	757.8	984.4	875	921.9	953.1	767.4	791.7	825.4	839.6	873.3	891.6	908.5	908.4	912.6	914.7	921.7	922.7	920.9	918.9	921.9	923.5	929.5	939	923	849.3	0.000511039	1.23191e-06	0.000509808	413.834	26.1683
231b	HU	2013	0.568	937.2	796.9	1851.6	882.8	937.5	968.8	804.8	820.5	840.1	858.5	871.8	904	914.6	918	920.4	926	922.7	928.8	934.8	932.8	928.9	928.4	931.7	943.1	902.8	876.2	0.00055527	1.22006e-06	0.00055405	454.118	26.5717
231b	HU	2013	0.64	929.4	773.4	976.6	851.6	921.9	960.9	0	779.8	787.5	813.3	829.9	852.9	869.9	887.8	892.1	905.2	892.9	894.3	895.9	897.2	904.8	919.2	934.5	917.9	849.4	914.7	0.000149898	1.72725e-06	0.000148171	85.7845	19.3341
231b	HU	2013	0.624	944.7	781.3	1789.1	867.2	937.5	976.6	794.1	827.6	844.9	875.8	889.8	918.6	936.3	929.5	923.7	931.8	928.8	928.7	931.6	928.2	929.9	938	950.5	946.4	915.9	779.2	0.000451463	1.1959e-06	0.000450267	376.509	25.7578
231b	HU	2013	0.568	914.9	773.4	1890.6	859.4	921.9	1226.6	795.1	821.1	842.3	867.4	878.4	895	907.8	916.9	921.2	929.1	940.6	933.7	930.5	937.9	939.1	941.2	949	956.4	928.9	816.2	0.000435575	7.44068e-07	0.000434831	584.397	27.6671
231b	HU	2013	0.568	918.1	773.4	1843.8	882.8	921.9	1054.7	790	810.1	825.2	853.3	872.3	894.2	899.8	900.7	902.8	913.9	920.5	904.3	902.8	910.3	905.3	901.9	916.4	924.3	906.6	910.6	0.000320785	7.13573e-07	0.000320071	448.548	26.5181
231b	HU	2013	0.648	930.2	781.3	1828.1	859.4	929.7	960.9	540.2	724.3	796.7	811.3	841.4	871.3	882.3	892.2	900	905.5	904.2	906.1	906.5	910.9	907.1	915.6	936.8	922.4	821.4	938.3	0.000346207	7.76992e-07	0.00034543	444.574	26.4794
231b	HU	2013	0.584	956.1	781.3	1835.9	890.6	945.3	1000	803.1	834.6	855.2	875.4	897.3	920.3	949	955.7	947.4	945.3	946.5	952	954.2	950.5	949.8	957	964	961.2	931.2	905.4	0.000407348	7.39739e-07	0.000406609	549.665	27.401
231b	HU	2013	0.568	935.4	796.9	1867.2	906.3	945.3	992.2	770.5	847.1	874.2	897.4	901.7	913.2	925.5	934.4	942.2	951.5	945.9	938.5	941.5	942	947.4	947.5	947.7	951.9	926.6	940.6	0.00127253	6.9848e-07	0.00127183	1820.86	32.6028
231b	HU	2013	0.592	942.7	812.5	1812.5	906.3	945.3	968.8	815.6	830.9	844.4	871.3	896.6	915.5	912.6	918.3	924.7	926.6	926.2	928.5	929.9	927.4	933.7	929.6	940.5	948.9	928.2	880.2	0.00143137	7.62404e-07	0.00143061	1876.45	32.7334
231b	HU	2013	0.608	932	796.9	1820.3	875	929.7	1062.5	743.4	840.8	856.5	867.4	882.9	898.6	917.6	924.6	926.5	913.2	914.3	912.9	914.1	914.9	912	916.3	929.2	936.3	894.5	832.6	0.000345672	5.75086e-07	0.000345097	600.078	27.7821
231b	HU	2013	0.544	950.8	804.7	1820.3	914.1	960.9	1007.8	819	845.6	861.5	898.1	936.4	949.5	932.6	916	920.8	939.5	952.5	959.8	955.3	948.5	948.1	952.9	971.8	975	944.4	899.7	0.000608299	6.44052e-07	0.000607655	943.487	29.7474
231b	HU	2013	0.552	959.3	796.9	1781.3	882.8	937.5	984.4	812.8	836.4	856.3	872.2	902.5	923.6	927.9	931.7	932.9	935.4	926.9	932.8	945.4	954.6	946.8	954	962.7	963.9	928.3	847.3	0.000731051	8.99259e-07	0.000730152	811.948	29.0953
236a	HU	2013	0.776	1054.6	734.4	1812.5	882.8	992.2	1101.6	756.5	812.6	856.3	880.1	887.4	898.2	878.3	900.4	1051.8	1071.4	1081.1	822.8	820.7	1019	817.8	831.9	815.8	807.3	885.4	886.3	9.53989e-05	5.3464e-07	9.48642e-05	177.436	22.4904
236a	HU	2013	0.784	1075.2	757.8	1812.5	976.6	1085.9	1164.1	771.4	825.7	859.2	886	918.1	931.5	932.2	1070.8	1088	830.5	1115.1	1127	846	1145.1	1147	1154.3	1166.2	1173.2	1185.9	1192.1	0.000109889	6.99506e-07	0.000109189	156.095	21.9339
236a	HU	2013	0.728	1046.5	789.1	1250	1015.6	1085.9	1156.3	830.7	859	880	949.6	930.8	904.3	943.5	1100.3	1065.3	1131.4	1135	1149.1	1156.8	1162.6	1163.8	1168.4	1172.5	1177.9	1091.3	1081.8	0.000144961	5.77912e-07	0.000144383	249.836	23.9765	-20
236a	HU	2013	0.776	1125.4	804.7	1710.9	1000	1109.4	1171.9	806	843.9	878.2	905.3	1058.9	1062	1061.3	1058.5	1086.6	1089.5	1095.1	1102	1105.3	1111.5	1119.4	1125.4	1129.1	1147.7	1167.3	582.2	0.000266408	5.89905e-07	0.000265818	450.612	26.538	-10
236a	HU	2013	0.784	1118.9	804.7	1843.8	992.2	1109.4	1164.1	781.2	846.9	867.6	895.4	904.7	908.6	920.7	1066.8	1090.8	1094.4	1108	1116.2	1115.5	1126	1137.1	1147.9	1150.1	1159.6	1094.4	1037.3	0.000242855	1.50973e-07	0.000242705	1607.6	32.0618	-15
236a	HU	2013	0.728	1116.8	812.5	1257.8	1046.9	1109.4	1164.1	842.5	855.9	857.2	1064.7	856.3	1045.8	1067.5	1096.8	1109.6	1122.7	1121.1	1136.4	1144.5	1161.2	1174.3	1177.4	1185.6	1179.6	1205.2	1190.2	0.000195795	9.15576e-08	0.000195704	2137.49	33.299
236a	HU	2013	0.632	1118.2	859.4	1242.2	1062.5	1117.2	1164.1	852.4	901.1	908.3	1090.9	1089.6	1078.6	1082.4	1098.9	1100.1	1110	1118.5	1122.7	1130.3	1144.8	1142.7	1154	1161.6	1171	1170.7	1174.4	0.000262955	7.62346e-08	0.000262879	3448.29	35.376
236a	HU	2013	0.664	1113.2	882.8	1257.8	1070.3	1125	1179.7	889.9	893.3	1054.6	1081.7	1070.6	1085.4	1100.7	1109.1	1118.4	1124.3	1130.7	1134.6	1145.5	1149.5	1158.5	1163.9	1167.2	1179.6	1206.7	1049.1	0.000397136	1.81457e-07	0.000396954	2187.6	33.3997
236a	HU	2013	0.624	1112	882.8	1250	1046.9	1109.4	1164.1	894.6	1024.1	1056.5	1074.6	1073.1	1077	1096.5	1095.8	1106.9	1122.7	1134.3	1141.7	1146.6	1151.2	1159.6	1167.1	1173.9	1174.2	1179.2	1179.8	0.000328044	1.24939e-07	0.000327919	2624.64	34.1907
236a	HU	2013	0.688	1110.3	882.8	1257.8	1054.7	1117.2	1179.7	847.4	896.4	939.1	1070.5	1071.9	1078.7	1085.1	1099.6	1106.9	1116.7	1130.6	1140.3	1146.9	1153.7	1164.4	1171.8	1178.3	1184.2	1188.9	1211.9	0.000291695	2.48936e-07	0.000291446	1170.77	30.6847
236a	HU	2013	0.688	1112.6	906.3	1257.8	1085.9	1132.8	1187.5	886.7	919.9	1081.3	1091.5	1099.4	1103	1117.5	1124.7	1134	1135.2	1144.3	1150.2	1162.8	1170.2	1172.6	1178	1181.8	1183.3	1192.7	1018.1	0.0005355	3.76092e-07	0.000535124	1422.85	31.5316
236a	HU	2013	0.736	1154.5	882.8	1257.8	1054.7	1132.8	1179.7	850.9	904.4	902.3	1071.9	1084.4	1097.8	1101.5	1104.9	1114	1116.1	1128.8	1133.2	1145.5	1151.5	1155.5	1160.6	1179.2	1186	1176.6	1130.5	0.000611611	1.1041e-07	0.0006115	5538.44	37.4339
236a	HU	2013	0.72	1116.5	898.4	1234.4	1054.7	1125	1171.9	844.6	946	1078.9	1092.2	1096.9	1098.7	1105.2	1112.8	1120.4	1120.6	1126.2	1132.8	1138.8	1148.4	1149.9	1155.2	1167.5	1172	1178.6	1178.9	0.000750688	9.64374e-07	0.000749723	777.42	28.9066
236a	HU	2013	0.688	1115.2	882.8	1226.6	1031.3	1093.8	1140.6	885.4	901.9	925.9	946.3	1039.5	1058.6	1068	1082.2	1089.4	1092	1099.6	1108.6	1119.8	1119.2	1122.9	1127.9	1135.5	1141.1	1149.6	1142.5	0.000529757	1.10593e-07	0.000529647	4789.16	36.8026
236a	HU	2013	0.696	1094.5	906.3	1234.4	1054.7	1101.6	1156.3	918.8	920.1	944.1	1069.8	1071.3	1068	1069.5	1077.2	1096.8	1097.4	1103.8	1112.2	1117.4	1117.3	1125.3	1135.6	1144.3	1154.3	1164.3	1014	0.000696397	5.68176e-07	0.000695829	1224.67	30.8802
236a	HU	2013	0.664	1121.5	898.4	1257.8	1054.7	1117.2	1164.1	886.9	928.1	940	937.7	1074.2	1076.3	1076.2	1080.5	1085.2	1090.5	1093.5	1099.1	1108.8	1117.9	1121.7	1128.4	1133.8	1158.3	1158.8	1151.5	0.000479323	1.12468e-07	0.00047921	4260.86	36.295
236a	HU	2013	0.608	1127.2	906.3	1265.6	1078.1	1132.8	1179.7	851	924.5	934.6	924.6	1102.8	1104	1100	1107.1	1114	1124.3	1132.2	1138.3	1143.6	1155.3	1162.2	1159.2	1174	1180.1	1182	1208	0.000216262	1.32507e-07	0.000216129	1631.07	32.1247
236a	HU	2013	0.6	1147	914.1	1265.6	1078.1	1140.6	1179.7	936.8	1079.6	1091.7	1110.5	0	1125.5	1125.7	1132.9	1127.3	1134.1	1140.5	1143.1	1143.6	1147.5	1158.8	1172.4	1174.7	1183.3	1186.1	999.2	0.000585285	3.28694e-07	0.000584956	1779.64	32.5033
236a	HU	2013	0.656	1130.7	914.1	1250	1070.3	1132.8	1171.9	905.6	948.1	1070	958.5	1100.5	1105.6	1103	1110.7	1111.6	1118.1	1125.2	1129.2	1135.1	1139.6	1150	1153.5	1172.7	1177.9	1187	1182.7	0.000452801	1.48447e-06	0.000451317	304.025	24.8291
236a	HU	2013	0.648	1128.9	929.7	1242.2	1039.1	1117.2	1164.1	939.7	980.3	1076.8	975.7	1106.6	1105.5	1110.4	1107.7	1115.8	1124.1	1129.1	1132.3	1140.7	1149.4	1156.1	1163.7	1181.5	1188.9	1116.8	1177.2	0.000676977	8.05074e-07	0.000676172	839.888	29.2422
236a	HU	2013	0.704	1118.2	929.7	1234.4	1062.5	1117.2	1164.1	931.1	969.8	1066.8	1095.3	1091.2	1098.8	1103.9	1115.6	1116	1121	1126	1133.3	1138.7	1142.7	1144.1	1145.5	1152.8	1157	914.8	1002.3	0.00104483	3.81344e-07	0.00104445	2738.86	34.3757
236a	HU	2013	0.592	1117.9	953.1	1226.6	1070.3	1117.2	1156.3	1056.5	1075.8	1091.9	1109.8	1113.1	1117.7	1117.7	1120.2	1123.3	1127.9	1133.2	1143.3	1145.5	1151.4	1152.5	1156.9	1170.6	587.1	1182.8	927.3	0.000531171	2.53115e-07	0.000530918	2097.54	33.2171
236a	HU	2013	0.568	1148.8	882.8	1242.2	1101.6	1148.4	1187.5	941.7	1125.8	1107.6	1121.1	1127.7	1129	1128.2	1133.9	1135.9	1137	1145.8	1150.4	1162.1	1159.5	1171.1	915.6	921.3	939.4	913.9	932.4	0.000110707	9.27255e-08	0.000110614	1192.92	30.7661
236a	HU	2013	0.608	1125.3	1031.3	1250	1101.6	1140.6	1179.7	1098.4	1112.3	1117.4	1119	1119.2	1125	1123.8	1126	1129.6	1131.6	1137.1	1145.9	1144.5	1152.8	1165.1	1166.3	1170.9	1172.5	1178.7	1211.3	0.000341381	1.96472e-07	0.000341184	1736.55	32.3969
236a	HU	2013	0.664	1109.7	890.6	1226.6	1046.9	1117.2	1164.1	934.5	1100.8	1090.2	1118	1122.2	1123.1	1128.5	1130.2	1132.3	1142.9	1143.2	1144.8	1150.7	1153.4	1167	1166.3	1169.4	1170.7	1171.5	986.1	0.000315819	2.72882e-07	0.000315546	1156.35	30.6309
239a	HU	2014	0.664	895	710.9	1859.4	875	1125	1664.1	747.5	774.4	794.1	815.3	829.1	837.8	844.5	849.8	848.8	851.8	854.2	862.9	864.7	862.6	865.9	867.2	883.3	898.6	901.5	902.1	0.000243701	1.55354e-06	0.000242147	155.868	21.9276
239a	HU	2014	0.672	913.2	742.2	1875	890.6	992.2	1656.3	762.9	785.6	804.3	826	837.3	848.7	850.1	856	861.4	866.3	873.8	878.5	888.4	891.8	897.8	902.9	907.5	919.8	944.4	930.5	0.000448292	3.81843e-06	0.000444474	116.402	20.6596
239a	HU	2014	0.68	911.9	742.2	1875	882.8	984.4	1656.3	768.1	793.4	812.7	821	830.9	843.3	853.2	858.6	864.6	872.4	882.9	889.3	894.8	888.5	889.2	889.3	900.2	914	931.3	915	0.000354531	4.52509e-07	0.000354079	782.479	28.9347	-20
239a	HU	2014	0.688	916.9	718.8	1875	882.8	976.6	1632.8	718	723.3	776.1	793	803.7	820.2	843.4	840.9	850.8	855.6	870.2	876.6	876.2	881.9	885.6	885.9	889.4	905.3	923	902.7	0.000399123	2.02382e-06	0.0003971	196.213	22.9273	-10
239a	HU	2014	0.624	909.1	734.4	1859.4	882.8	1007.8	1648.4	754.4	779.6	804	822.2	834.1	836.4	836.6	843.9	853.2	856.7	863.3	873.8	885.2	891.3	890.1	890.2	894.1	898.1	910.6	902.9	0.000341816	1.37699e-06	0.000340439	247.234	23.9311	-15
239a	HU	2014	0.616	920.3	742.2	1867.2	875	953.1	1562.5	624.5	795	811.8	829.6	839.6	846.3	846.3	852.2	854.7	856.5	863.6	871.2	877.1	877.9	877.8	885.6	901.8	918.7	939.6	933.8	0.000252782	1.4123e-07	0.000252641	1788.87	32.5258
239a	HU	2014	0.6	925	765.6	1867.2	882.8	953.1	1546.9	799.4	823.4	821	856.3	868.4	879.3	889.4	900.6	902.3	904.6	910.3	914.9	910.7	907.6	907	908.4	910.5	923.4	641.2	932.3	0.000195176	1.36285e-06	0.000193813	142.212	21.5294
239a	HU	2014	0.608	875.9	734.4	1851.6	867.2	945.3	1640.6	759.2	799.9	827.7	839.6	846.8	847.9	856.7	866.9	864.4	864.2	868.3	866.3	866	870.3	881.9	880.5	881	890.6	904	890.8	0.000195287	3.97664e-06	0.000191311	48.1086	16.8222
239a	HU	2014	0.664	874.9	734.4	1851.6	875	945.3	1640.6	754.3	793.3	822.1	848.4	862.4	860.7	865.2	868.7	876.4	880.3	879.2	887.7	891.2	894.1	892.1	896.4	905.9	916	909.6	908.9	0.00026694	3.58039e-06	0.00026336	73.5561	18.6662
239a	HU	2014	0.696	898.9	757.8	1867.2	882.8	937.5	1617.2	768.8	796.4	798.6	829.6	848.9	852.8	857.1	861.1	859.2	870.3	879.9	886.3	886	887.2	892.3	897	901.9	911.7	913.2	934.6	0.0001784	1.29079e-06	0.000177109	137.21	21.3739
239a	HU	2014	0.624	898.4	765.6	1843.8	890.6	953.1	1664.1	778.7	818.4	839.1	854.4	862	869.3	873.2	878.3	878	881.9	888.6	890.8	897.5	898.9	900.3	899.5	897.4	901.1	915.8	911.7	0.000198431	1.07516e-07	0.000198323	1844.6	32.659
239a	HU	2014	0.584	895.4	781.3	1851.6	890.6	937.5	1640.6	794.8	824.2	842.6	858.8	876.1	883.3	888.8	896.4	896.2	901.7	900.4	900.7	906.5	902.1	899.4	897.9	906.2	918.1	928.2	927.5	0.000422697	3.32277e-08	0.000422664	12720.2	41.0449
239a	HU	2014	0.592	913.9	796.9	1882.8	906.3	960.9	1695.3	812.8	842.3	863.5	876.4	881.6	885.8	891.7	897.5	900.4	906.8	908.3	910	906.6	908.6	910.5	918.2	924.1	930.1	934.2	941.5	0.000515982	8.09813e-08	0.000515901	6370.62	38.0418
239a	HU	2014	0.608	911.8	796.9	1882.8	906.3	968.8	1703.1	822.9	865.8	880.1	890.5	898.6	903.2	903	909.7	913.2	914.9	916.3	919.6	918.1	919.4	920.4	924.1	923.2	926.1	935.4	939.2	0.000617612	2.41747e-07	0.00061737	2553.78	34.0718
239a	HU	2014	0.592	898.1	765.6	1867.2	890.6	976.6	1648.4	781	815.6	842.7	852.8	855.1	866.2	875.4	876.7	883.5	887.7	888.2	893	891	886.5	885.1	889.6	900.1	920.3	914	938.3	0.000799574	1.71261e-07	0.000799402	4667.75	36.6911
239a	HU	2014	0.6	916	750	1882.8	890.6	976.6	1656.3	771.4	788.8	807.5	820.2	827.3	849.4	859	864.2	869.6	878.1	879.7	883.1	881.4	890.2	896	906.6	914.7	931.1	926.4	950.4	0.000764423	7.2012e-08	0.000764351	10614.2	40.2589
239a	HU	2014	0.576	888.2	734.4	1843.8	875	953.1	1609.4	791.4	817.2	833.4	852.1	858.5	865.4	873.9	876.7	882.8	891.3	888.9	891.7	894.2	896.1	900	900.9	908.2	910.8	921.5	646.8	0.000712705	2.71536e-08	0.000712678	26246.1	44.1907
239a	HU	2014	0.6	904.2	742.2	1843.8	875	937.5	1546.9	776.5	810.7	834	842.7	856	867.3	872.1	877.2	877.5	889.2	894.3	892.5	895.3	898.6	898.3	897	906.5	923.2	924.3	933	0.000533849	1.202e-07	0.000533729	4440.35	36.4742
239a	HU	2014	0.688	901.7	625	1859.4	875	1109.4	1617.2	640.1	629.8	673.1	731.4	750.5	756.2	773.6	781.8	787.9	799.5	817.5	831.3	839.3	841.2	847.7	852.2	853.8	872.1	902.9	865.1	0.000496424	9.14251e-06	0.000487282	53.2985	17.2671
239a	HU	2014	0.672	909.4	734.4	1867.2	882.8	1000	1664.1	747.1	782.5	802.8	820	832.2	844.6	848.5	853.5	864	867.6	869	871.4	875.6	884.4	886.9	894	891	902.3	911.5	915.5	0.000679339	4.52527e-08	0.000679294	15011.1	41.7641
243a	HU	2013	0.432	1021.3	843.8	1835.9	968.8	1031.3	1476.6	823.6	852.1	928.1	978.3	1013.9	1028	1033.3	1031.2	1019.6	1011.2	1001.2	988.4	977.7	967.3	963.2	956.5	952	964.1	977.4	903.1	0.000197149	4.66147e-06	0.000192488	41.2934	16.1588
243a	HU	2013	0.464	991.1	757.8	1851.6	945.3	1000	1523.4	766.2	859.9	928.8	958.8	981.1	995	998.4	993	989.1	979.5	976.2	970.6	961.7	965.7	962.6	960.2	966.5	973.3	971.2	863.9	0.000202438	1.30327e-05	0.000189405	14.5331	11.6236
243a	HU	2013	0.464	983.1	835.9	1796.9	945.3	1000	1515.6	757.8	852	930.3	955.3	980.3	988.3	984	981	974.4	971.4	966.2	962.8	961.9	957.4	954.6	952.8	955.3	965.9	962.4	883.5	0.000171389	1.04625e-05	0.000160926	15.3812	11.8699	-20
243a	HU	2013	0.464	985	843.8	1835.9	945.3	1007.8	1546.9	764.7	855.2	926	960.3	982.3	991.3	991.6	988	979.5	970	970	962.8	962.9	950.3	945.6	944.7	947.1	956.3	959.1	863.3	0.000160661	7.2396e-06	0.000153421	21.1919	13.2617	-10
243a	HU	2013	0.472	971.7	750	1859.4	937.5	1000	1539.1	703	855.8	910.1	952	966.5	981.4	985	984.5	979.9	971.5	958	955.4	951.8	948.3	949	952.1	955	969.8	966.4	911.3	0.000176552	1.1085e-05	0.000165467	14.927	11.7397	-15
243a	HU	2013	0.472	957.8	750	1937.5	945.3	1304.7	1726.6	1562.9	859.8	904.9	926.9	949.7	968.3	971.7	972.2	964.3	958.9	951.8	948.3	944.3	941.2	940.1	943.8	947.7	967.6	968.4	878.9	0.000190023	1.96406e-05	0.000170383	8.675	9.3827
243a	HU	2013	0.456	999.1	804.7	1914.1	953.1	1015.6	1648.4	828.5	897.8	932.5	969.7	988.9	1005.4	1005.3	997.7	982.6	968.6	956.5	947.2	943.3	940.9	939.2	945.4	969.8	977.1	917.8	882.7	0.000166132	1.19331e-05	0.000154198	12.9219	11.1133
243a	HU	2013	0.464	1000.7	843.8	1914.1	960.9	1023.4	1585.9	812.6	894.1	932.3	965.6	986.9	1008.2	1018.5	1002.7	994.7	979.2	967.2	955.3	950.7	943.1	939.5	937	942.2	953.9	955.3	919.8	0.000189891	1.08123e-05	0.000179079	16.5626	12.1913
243a	HU	2013	0.464	982.9	734.4	1789.1	921.9	976.6	1257.8	758.4	864.3	930	958.3	980.3	991.8	994.1	992.3	990.4	977.4	973.1	959.3	956.5	950.7	952.3	947.4	948	955.3	953.4	878.7	9.53231e-05	3.26871e-06	9.20544e-05	28.1623	14.4967
243a	HU	2013	0.472	994.3	726.6	1820.3	929.7	992.2	1367.2	735.4	859.6	938.1	969.6	997.3	1005.6	1007.3	1000.4	988.2	989.7	974.5	971.3	963.1	958.5	950.1	953.8	959.1	964.7	944.3	956.7	9.16342e-05	3.60527e-06	8.80289e-05	24.4167	13.8769
243a	HU	2013	0.504	996.7	742.2	1835.9	945.3	1007.8	1445.3	725.9	859.9	936.8	965.4	998	1010.3	1007.3	991.5	987.2	976	988.8	962.5	958.3	949.8	951.3	958.7	963.5	893.9	902.9	958.3	0.000117776	4.82511e-06	0.00011295	23.4089	13.6938
243a	HU	2013	0.464	987.8	742.2	1843.8	937.5	1007.8	1507.8	714.3	863.7	935.4	970.4	992.3	998.1	998.9	997.4	989.2	982.3	972.4	967.1	962.7	960.8	952.2	954.6	956.1	963.2	949.5	901.6	0.000105128	7.82643e-06	9.73012e-05	12.4324	10.9455
243a	HU	2013	0.504	986.5	687.5	1820.3	929.7	992.2	1398.4	699.5	855.6	933.6	962.4	964.7	999.5	995.8	994.9	987.7	975.1	966.1	959.1	947.8	945.6	948.3	956.2	960.6	943.1	905.1	950.4	8.58722e-05	7.15246e-06	7.87198e-05	11.006	10.4163
243a	HU	2013	0.488	999.5	687.5	1804.7	937.5	1000	1382.8	702.7	854.9	945.6	984.4	959	1012.5	1002.1	1003.5	989.4	991.1	991	967.1	962.2	957.4	950	954.5	959	953.2	930.7	905.8	7.78625e-05	8.19816e-06	6.96643e-05	8.49756	9.29294
243a	HU	2013	0.528	968.5	695.3	1843.8	929.7	992.2	1492.2	722.1	863.2	902.3	964.5	983.1	991.3	987.7	978.6	972.1	961.8	957	951.9	948.1	948.4	949.7	970.7	974	871.5	971.3	966.4	7.73538e-05	9.84527e-06	6.75085e-05	6.85695	8.36131
243a	HU	2013	0.456	1017.5	851.6	1835.9	960.9	1023.4	1484.4	788.8	890.6	960	1003.1	1023.5	1022.9	1013.7	1005.9	1000.7	1001.5	972.3	977.8	967.7	964.3	958.3	954.9	966.9	985.5	965.3	871.7	0.000141898	9.74248e-06	0.000132156	13.5649	11.3242
243a	HU	2013	0.48	1013.9	703.1	1843.8	945.3	1015.6	1468.8	725.9	871.3	903.3	973.4	1008.6	1023.5	1016.9	1008.7	1002.9	993.8	987.2	967.3	960	952.6	953.5	960.4	971.6	961.7	879.2	976.4	8.69342e-05	3.82274e-06	8.31115e-05	21.7413	13.3729
243a	HU	2013	0.448	1000.3	750	1828.1	945.3	1000	1375	766.9	859.1	905.9	970.2	998.4	1011.2	0	1007	1003.9	998.1	990.7	985.3	972.2	965.6	967.8	968.2	970.7	975.8	965.4	882.8	0.000131321	3.97547e-06	0.000127345	32.0328	15.0559
243a	HU	2013	0.456	996.1	750	1828.1	945.3	1000	1359.4	726.8	897.9	959	987.2	1000.9	1007.9	1014.7	1003.2	995.8	992.2	986.1	972.1	970.4	970	969.5	973	978.7	992.9	967.4	894.3	0.000125374	6.25483e-06	0.000119119	19.0443	12.7977
243a	HU	2013	0.512	990.6	718.8	1828.1	937.5	992.2	1390.6	744.4	893.8	949.9	987.9	997.3	1001.2	997.5	993.3	990.8	976.4	973.8	965.3	971.6	962.7	969.8	978.8	983.2	895.1	980.8	695.8	9.41584e-05	4.54976e-06	8.96086e-05	19.6952	12.9436
243a	HU	2013	0.464	969.7	695.3	1804.7	921.9	984.4	1242.2	706.9	856.2	935.3	962	984.2	943.6	992.5	996	989.7	981.9	978.1	970.2	960.6	959.4	950.5	952.3	956.2	965.5	962.6	912.9	8.92048e-05	2.57433e-06	8.66305e-05	33.6517	15.2701
243a	HU	2013	0.504	974.8	687.5	1820.3	929.7	984.4	1242.2	718.3	863.8	938.5	967.1	890.4	1006.1	943.8	992.3	990.2	979.2	975.6	961.3	960.2	951.5	954	958.1	976.4	957.1	901.5	965.4	6.63647e-05	5.20855e-06	6.11562e-05	11.7415	10.6972
243a	HU	2013	0.488	982.2	843.8	1914.1	945.3	1000	1632.8	824.3	897.1	924.7	949.4	976.6	998.4	996.9	991.9	983.8	983.6	970.3	965.4	947.7	943.9	941.5	949.8	959.2	965.2	961.4	852.6	0.000159763	2.25598e-05	0.000137203	6.08176	7.84029
243a	HU	2013	0.472	975.4	789.1	1906.3	937.5	984.4	1593.8	844	909.3	932.8	959.5	975.2	982	979.5	975.9	967.7	966.6	954.3	948.2	946.1	944	939.7	939	948.2	964.5	953.7	863	0.000301864	3.40598e-05	0.000267804	7.86275	8.95574
243a	HU	2013	0.432	999.9	843.8	1757.8	953.1	1007.8	1406.3	866.6	895.3	968.6	992.5	1006.9	1011.4	1014.8	1009.6	1005.6	994.6	989.7	974.1	968.6	958.5	951.4	959.3	965.3	975	963	871.8	0.000433886	1.18634e-05	0.000422023	35.5736	15.5113
243a	HU	2013	0.448	990.7	796.9	1851.6	937.5	992.2	1375	835.8	905.3	933	966.8	983.7	990.5	997.4	993.5	983	982	978.1	964.5	962	951.7	947	949.9	954	962.4	962.9	859.8	0.00042405	1.9643e-05	0.000404407	20.5878	13.1361
243a	HU	2013	0.448	992.7	859.4	1882.8	953.1	1007.8	1562.5	884.9	906	937	977.1	996.1	1006.1	998.1	988.1	987	982.6	978.1	970.4	959.7	956.1	954.8	953.3	962.2	972.3	966.5	913.3	0.000499554	1.93798e-05	0.000480174	24.7771	13.9405
243a	HU	2013	0.44	987	796.9	1898.4	937.5	992.2	1515.6	835.6	894.3	925.4	957	986.7	993.6	988.9	981.9	976.8	966.4	968.7	963.3	947.9	942.6	944	948.1	952.4	958.1	952.1	879.1	0.000509253	2.18306e-05	0.000487423	22.3275	13.4884
243a	HU	2013	0.44	993.2	804.7	1859.4	937.5	992.2	1445.3	824.5	871.4	928.9	957.5	985.2	997.7	999.5	998.9	995.4	990	983.6	976.6	963.6	957.1	957.1	958.9	963.4	985.4	981.3	879.5	0.000645737	8.1319e-05	0.000564418	6.94079	8.41409
243a	HU	2013	0.44	998	851.6	1875	953.1	1007.8	1562.5	840	898.6	940.2	983.8	1001	1009	1007.7	1002.7	993.1	990	975.2	956.5	952.9	956.3	956.2	956.1	960.1	965.7	969.6	882.9	0.000461453	1.63976e-05	0.000445055	27.1415	14.3363
243a	HU	2013	0.432	976.5	796.9	1914.1	945.3	992.2	1656.3	852.4	898.3	932.9	962.8	979.9	987.6	988	986.1	979.9	978.7	964.7	955.9	950.6	947.2	945.3	945.4	947.2	957.5	948.1	886.5	0.000634278	1.97967e-05	0.000614482	31.0395	14.9192
243a	HU	2013	0.44	992.7	796.9	1914.1	945.3	1000	1570.3	847.6	894.5	932.6	974.1	996.7	1003.8	996	991.1	985.8	975.6	969.6	954.7	953.5	949.1	945.9	945.4	947.6	954.5	952.2	871.4	0.000762744	4.45262e-05	0.000718218	16.1302	12.0764
243a	HU	2013	0.44	986.9	796.9	1914.1	945.3	1000	1585.9	828.2	868	932.4	965.8	984.8	993.3	993.5	988.8	977.3	970.5	961.3	959.7	958.4	944.8	939.6	939.1	944.9	952.1	947.2	871.8	0.000659191	2.67499e-05	0.000632441	23.6428	13.737
243a	HU	2013	0.44	961.2	750	1929.7	921.9	976.6	1710.9	823.2	863.7	900.7	922.2	950.3	967	970.7	962.6	952.1	944.8	938	930.9	922.7	918.1	911.8	915.5	925.8	940.1	939.5	867	0.000658813	2.11915e-05	0.000637621	30.0886	14.784
243a	HU	2013	0.44	991.4	828.1	1921.9	953.1	1000	1671.9	857.7	905.3	930	948.9	984.5	996.2	996.3	992.1	988.6	970.8	962.8	957.2	951.5	949.6	946.7	951.8	958.5	966.4	948.9	909.9	0.00057334	3.24815e-05	0.000540859	16.6513	12.2145
243a	HU	2013	0.456	982.6	812.5	1929.7	953.1	1023.4	1718.8	784	867.9	913.9	938	972.6	983.4	986.2	994.3	993.9	981.8	969.9	958.1	943.7	937.9	936	933.3	939.7	949.3	953.6	902.1	0.000625669	5.02501e-05	0.000575419	11.4511	10.5885
243a	HU	2013	0.464	998.8	835.9	1921.9	960.9	1015.6	1648.4	832.2	905.2	940.5	975.9	998.8	1005.8	997.9	992	991	973.9	957.7	952.2	944.9	941.6	938.9	940.1	942	948.3	952.3	867.5	0.000733508	7.06505e-05	0.000662857	9.3822	9.72305
243a	HU	2013	0.448	989.6	820.3	1929.7	953.1	1015.6	1687.5	835.9	864.4	928.2	952.8	986.7	996.9	999.9	997.4	992.7	988.8	973.5	963.5	958.7	955.5	953.3	954.3	958.5	966.1	958.2	875.2	0.000764817	4.49263e-05	0.000719891	16.0238	12.0477
243a	HU	2013	0.448	998.9	828.1	1921.9	960.9	1015.6	1656.3	851.1	898.3	936.5	973.6	993.4	1006.3	1003.1	992.7	985.5	971.3	964.3	960.2	954.2	950.1	947.2	944.2	946.5	971.3	968.7	886.5	0.000918541	7.34354e-05	0.000845106	11.5082	10.6101
243a	HU	2013	0.456	983.5	812.5	1937.5	945.3	1007.8	1687.5	801	894	929.2	957.7	985.8	988.7	988.2	986.3	974.3	966.4	957	954.4	946	940.8	934.8	932.8	937.1	946.1	931	866.5	0.000571544	6.26975e-05	0.000508846	8.11589	9.09336
244a	HU	2013	0.944	1025.2	507.8	1757.8	945.3	1085.9	1273.4	718.3	729.6	759.9	768.5	806.1	838.7	1000.4	1011.5	1017.6	1025	528	530.6	536.9	1090.1	1130.5	954.8	1153.9	1182.1	1192.8	1229.1	0.000304996	5.44748e-06	0.000299548	54.9884	17.4027
244a	HU	2013	0.84	909.5	726.6	1843.8	914.1	1015.6	1179.7	748.2	779.1	790	818	841.3	876.4	882.7	909.2	898	979.5	1005.7	1016.9	1016.3	1022.1	1034.6	1048.4	1123.2	1147.9	1018.4	539.9	0.000504613	4.88103e-06	0.000499732	102.383	20.1023
244a	HU	2013	0.736	968.6	796.9	1828.1	906.3	976.6	1054.7	781	800.2	813.3	850.2	862.2	885.5	909.3	947.9	960.8	972.5	979.9	982.9	981.8	967.3	974.1	992.7	1002	1042.6	991.4	977.6	0.000960889	3.71909e-07	0.000960517	2582.67	34.1207	-20
244a	HU	2013	0.76	944.5	804.7	1835.9	914.1	968.8	1140.6	770.8	792.1	806.2	828.8	851	862.7	880	903.1	906.2	912.2	922.7	944.4	957.6	964.7	993.5	958.2	1007.2	1020.4	1041.9	1213.2	0.00106517	5.52728e-07	0.00106461	1926.11	32.8468	-10
244a	HU	2013	0.704	954.1	789.1	1835.9	921.9	984.4	1117.2	789.5	811.4	827.3	844.1	860	886	896.7	912.8	926.2	949.6	951.2	956.2	956.9	966.5	980.6	993.4	1006	1018.2	1018.9	1065.8	0.00153715	4.52848e-06	0.00153262	338.44	25.2948	-20
244a	HU	2013	0.656	966.9	796.9	1117.2	914.1	976.6	1054.7	796.3	817.6	833.2	846.8	868.3	888.8	905.9	923.7	929.9	936.5	960.4	965.2	981.8	985.9	1001.3	1010.1	1015.1	1027.5	1035.7	940.6	0.00132432	2.29397e-07	0.0013241	5772.07	37.6133
244a	HU	2013	0.688	965.8	804.7	1804.7	929.7	984.4	1101.6	788	816	847	853.6	886.6	887.3	916.7	928.3	947.2	957.7	956.2	958.8	965.2	971.5	982.1	995.6	1002.9	1008.7	1029.8	1223.4	0.00154591	1.50799e-05	0.00153083	101.515	20.0653
244a	HU	2013	0.704	990.7	773.4	1640.6	945.3	1015.6	1140.6	782.2	800.4	821.1	842.7	896.8	977.6	984.2	987	995.7	1006.6	1014	1018.8	1022.1	1024.2	1037	1056.2	1106.4	1197.1	1105.8	1253.4	0.00073445	7.04701e-06	0.000727402	103.221	20.1377
244a	HU	2013	0.672	966.6	796.9	1851.6	914.1	976.6	1062.5	798	819.3	834.5	848.6	857.3	889.6	905.8	913.6	935.6	935.7	937.5	944.2	956.9	962.2	969.2	993.6	1005	1009.8	1027.6	1048.7	0.000742081	1.14131e-06	0.000740939	649.203	28.1238
244a	HU	2013	0.672	937.8	492.2	1835.9	906.3	968.8	1039.1	813.1	837.2	857.4	877.1	899.1	925.6	943.7	980.9	978.7	991.3	998	996.3	1006.7	1008.7	1011.3	1007.2	1021.5	1048.9	1054.8	697.3	0.000491507	2.15915e-05	0.000469915	21.7639	13.3774
244a	HU	2013	0.656	1044.2	796.9	1828.1	945.3	1023.4	1101.6	803.4	846.5	868.5	898.7	950.7	981.4	998	995.6	994.3	997.3	995.2	996.8	1004.9	1013.2	1029.9	1037.3	1046.4	1053.6	1078.1	1065.7	0.00139582	4.03461e-07	0.00139541	3458.61	35.389
244a	HU	2013	0.632	1045.4	812.5	1820.3	953.1	1031.3	1101.6	815.6	865	886.5	911.7	958.6	976.8	989.1	995.6	1005.7	1001.4	1002.7	1011.2	1022.1	1027.9	1037	1040	1044.4	1058.8	1088.4	1070	0.00138594	1.84469e-06	0.0013841	750.314	28.7524
244a	HU	2013	0.608	1036.2	820.3	1804.7	945.3	1031.3	1101.6	835.9	877	890.3	918.5	997.4	1001	1012.2	1016.8	1012.7	1015.7	1021.7	1026.3	1024.5	1026.9	1034.2	1039.5	1041.8	1049.9	1041.6	529.7	0.00107154	6.30782e-07	0.00107091	1697.74	32.2987
244a	HU	2013	0.616	993.5	812.5	1828.1	937.5	1007.8	1085.9	820.7	871.4	898.2	939.4	978.6	996	1006.5	1013.1	1023.5	1025.5	1021	1022.4	1027.4	1028.4	1023.7	1028.7	1028.9	1034.9	1049	1044.9	0.00120213	1.79387e-07	0.00120195	6700.31	38.2609
244a	HU	2013	0.632	1045.1	820.3	1734.4	945.3	1031.3	1093.8	831.1	855.2	883	917.8	969.5	1002.3	1010.4	1018.4	1028	1032.9	1036.2	1035.4	1043	1048.4	1050	1056.5	1053.4	1063.1	1054.2	1074.3	0.00117042	2.50534e-06	0.00116792	466.172	26.6855
244a	HU	2013	0.592	1039.1	804.7	1804.7	945.3	1031.3	1101.6	831.6	870.4	899.1	966.7	1001.7	1008.9	1016.4	1027.9	1030.4	1036.4	1039.6	1042.6	1041.9	1046.9	1055.6	1056.9	1058.3	1066.5	1095.1	1065.1	0.00104547	1.60885e-07	0.00104531	6497.24	38.1273
244a	HU	2013	0.656	975.6	796.9	1843.8	937.5	1007.8	1085.9	761.7	832.1	853.8	880.6	915.3	951.6	965.9	984.8	988.4	999.1	1009.1	1011.8	1017.9	1023.7	1020	1036.6	1043.2	1052.1	1041.6	1061.7	0.000905158	3.27346e-07	0.000904831	2764.14	34.4156
244a	HU	2013	0.592	1030.8	835.9	1164.1	960.9	1023.4	1085.9	840.3	876.2	906.7	951.3	977.8	1000.3	1006.7	0	1017.7	1025.6	1029.2	1032.6	1034.6	1036.4	1040.3	1038.6	1038.5	1053.1	1083.6	1052.4	0.00177263	2.56449e-07	0.00177237	6911.21	38.3955
244a	HU	2013	0.648	977.2	804.7	1765.6	929.7	992.2	1062.5	829.8	866.4	895.3	935.5	974.2	987.9	989.8	1009.2	1019.5	1026.1	1027.4	1031.9	1040.5	1046.7	1044.2	1045.1	1052.1	1063	1062.2	533.4	0.00060968	5.25035e-06	0.00060443	115.122	20.6116
244a	HU	2013	0.616	1040.9	789.1	1187.5	937.5	1007.8	1093.8	816.4	863.7	899.7	916.9	931.9	963.2	983.9	992.5	1000	1012.1	1022.5	1027.1	1042.1	1040.6	1042	1039.7	1047.5	1070	1046.9	1075.3	0.000504207	1.48962e-06	0.000502718	337.482	25.2825
244a	HU	2013	0.576	1030.2	804.7	1242.2	945.3	1031.3	1109.4	841.8	883.2	923.2	1010.2	1030.8	1032.8	1041.5	1043.2	1043	1048.3	1051.4	1056	1057.9	1055	1055.9	1057.8	1058.1	1058.7	1086.4	535.4	0.000350581	1.66119e-06	0.000348919	210.042	23.2231
244a	HU	2013	0.6	1051.8	523.4	1835.9	937.5	1039.1	1148.4	834.7	873.9	899.2	930.6	912.8	1025.5	1031	1029.2	1037	1038.7	546.2	550.4	547.5	522.8	1056.5	1072.9	1069.3	1081	1126.8	1056.6	0.00058695	3.29645e-06	0.000583653	177.055	22.4811
244a	HU	2013	0.576	1051	867.2	1125	968.8	1039.1	1078.1	882.2	923	1012.4	1041.1	1049.3	1054.9	1056.2	1060.8	1065.2	1063.2	1064.1	1063.3	1063.5	1067.9	1072.2	1069	1071.2	1076.8	1099.3	1078.2	0.000745306	2.90077e-06	0.000742405	255.934	24.0813
244a	HU	2013	0.536	1050.7	531.3	1140.6	945.3	1031.3	1078.1	847.4	903.3	935.1	966.5	1026.7	1041.3	1046.6	1050	1054.8	1056.8	1057.3	1059.7	1070.4	1068	534	535	1070.1	1066.9	1070.7	1100.1	0.000829914	2.24054e-06	0.000827673	369.408	25.6751
244a	HU	2013	0.584	1048.9	867.2	1109.4	968.8	1023.4	1062.5	856.1	902.3	944.5	993.8	1018.1	1023.7	1036.7	1043	1047.4	1051.9	1051.8	1052.9	1052.4	1053.8	1062.8	1073.4	1071.3	1075.3	1056.2	1063	0.000959278	1.54693e-07	0.000959123	6200.16	37.924
244a	HU	2013	0.624	1040.4	851.6	1250	953.1	1015.6	1070.3	823.9	906.4	937.9	985	1024.8	1035.7	1035	1041.7	1043.8	1045.4	1043.2	1049.2	1048.9	1052	1054.7	1073.6	1085.9	1082.8	1057.3	618.5	0.000499293	3.17035e-07	0.000498976	1573.88	31.9697
244a	HU	2013	0.568	1037.2	531.3	1304.7	960.9	1031.3	1093.8	820.7	922.5	996.1	1031.5	1037.2	1042.4	1052.7	1063.7	1062	1062.9	1067.9	1065.8	534.6	534.7	538.8	550.7	1073.6	1082.9	1075.2	956.6	0.000418586	6.78647e-07	0.000417908	615.796	27.8944
244a	HU	2013	0.56	1021.2	843.8	1125	945.3	1015.6	1062.5	828.6	896.4	938.1	1015.1	1028.5	1036.8	1039.8	1043.3	1042.6	1047.1	1050.3	1053.2	1050.1	1048.5	1050.9	1057.6	1073	546.2	1065.6	538.9	0.000638566	2.33786e-07	0.000638333	2730.41	34.3623
244a	HU	2013	0.576	1070.6	843.8	1148.4	976.6	1062.5	1109.4	874.5	914	1042.6	1058.6	1068.3	1069.8	1070.5	1067.3	1067.9	1072.3	1074.6	1077	1082	1097.6	1107.1	1104.7	1092.8	1078.3	534	534.2	0.00157528	2.13161e-06	0.00157315	738.011	28.6806
244a	HU	2013	0.632	1083.8	867.2	1140.6	976.6	1062.5	1101.6	796.9	922.1	1029.4	1051.1	1067.1	1068.6	1076.6	1080.3	1080.5	1083.4	1084.9	1087.3	1100.4	1100.8	1086.6	1086.8	1082.5	1035.9	1072.1	543.7	0.00146168	1.19553e-06	0.00146049	1221.63	30.8694
244a	HU	2013	0.56	1089.2	851.6	1140.6	968.8	1054.7	1101.6	888.3	937.1	1032.1	1056.8	1062.1	1069.3	1069.5	1071.6	1077.2	1082.6	1085.7	1085	1087.4	1097.6	1105.9	1093.9	1093.3	1082.7	961.9	1069.4	0.000993622	3.26346e-07	0.000993296	3043.69	34.834
244a	HU	2013	0.536	1091.8	523.4	1179.7	968.8	1062.5	1125	832.5	947.7	521.6	1064.6	538.8	541.5	1088	1090.8	1089.8	1087.7	1086.9	1087.4	1088.2	1089.8	1092.7	1110.5	1137.7	1130.8	1086.8	949.8	0.00104055	3.48792e-07	0.0010402	2982.29	34.7455
244a	HU	2013	0.568	1084.7	851.6	1171.9	976.6	1062.5	1117.2	893.8	938.9	1035.9	1062.1	1074.2	1073.5	1084.9	1083.5	1085.4	1086.2	1087.2	1086.4	1087.5	1093.1	1126.9	1127	1113.3	1079.7	952.3	1066.2	0.00114442	2.58838e-07	0.00114416	4420.39	36.4546
244a	HU	2013	0.52	1093.8	851.6	1156.3	976.6	1078.1	1117.2	881.1	944.6	1055.4	1076	1074.5	1085.4	1092.1	1093.9	1100.4	1098.6	1095.7	1095.3	1091	1088.7	1089	1092	1109	1114	1080.6	949.1	0.000952914	7.2189e-07	0.000952192	1319.03	31.2025
244a	HU	2013	0.544	1073	843.8	1125	953.1	1046.9	1093.8	898.1	948.2	1062.4	1078.7	1084	1080.4	1076	1077.3	1081.4	1080.4	1080.3	1075.6	1062.9	1061.6	1057	1056.5	1063.1	1040.1	1060.7	1045.6	0.00058085	8.68046e-07	0.000579982	668.146	28.2487
249a	HU	2013	0.656	945.1	789.1	1898.4	921.9	960.9	1546.9	804.8	897.7	933.5	945.9	945	948.3	944.2	947.8	803	796.3	955.3	945.2	945.6	948.9	948.7	943.9	946.6	947.2	932.6	923.1	0.000873542	1.67938e-06	0.000871863	519.159	27.153
249a	HU	2013	0.656	951	812.5	1929.7	929.7	984.4	1679.7	796.7	894.2	943.1	953.6	947.5	940.6	935.7	930.4	927.1	927.8	931	942	944.9	953.4	910.9	905.8	911.6	920.5	909.9	865.6	0.000590153	1.99857e-06	0.000588154	294.287	24.6877
249a	HU	2013	0.68	933.2	796.9	1937.5	929.7	1054.7	1679.7	783.8	885.8	927.1	943.9	949.2	953.2	949.3	947.9	951.5	950.4	955.2	958.1	957.7	955.8	953.8	955.4	956.1	943.8	924.3	1568.8	0.000749384	2.9283e-06	0.000746456	254.911	24.0639	-20
249a	HU	2013	0.664	949.5	781.3	1945.3	921.9	992.2	1671.9	761.6	878	929.3	949.2	953.7	949.7	948.1	951.3	951.5	951.1	950.5	962.5	962.2	962.8	959.4	959.7	962.5	945.5	939.6	884.5	0.000832896	2.2879e-06	0.000830608	363.043	25.5996	-10
249a	HU	2013	0.656	958	812.5	1937.5	921.9	984.4	1671.9	773.1	881.6	925.6	949.6	956.6	957.4	960.5	959.6	957.8	962.2	963.4	963	954.8	955.2	959.2	958.6	961.4	960.7	926.1	852.3	0.000859671	4.64317e-06	0.000855028	184.147	22.6517	-20
249a	HU	2013	0.68	928	796.9	1921.9	921.9	1296.9	1734.4	780.3	874.4	906.8	935.2	935.8	938.9	942.1	937.2	937.8	941.3	942.3	946.5	945.3	945.5	947.5	941.3	937.5	937.3	927.8	877.3	0.000921741	1.33609e-05	0.000908381	67.9877	18.3243
249a	HU	2013	0.656	944.4	804.7	1937.5	929.7	1304.7	1734.4	761.6	874.7	909.3	936.5	938.7	945.7	951.5	954.1	951.7	952.6	951.5	953.8	956.5	955.2	951.2	947.8	949.4	949.5	931	808.3	0.0011553	8.28811e-06	0.00114701	138.392	21.4111
249a	HU	2013	0.672	949.1	812.5	1945.3	937.5	1281.3	1726.6	773	886.3	935.3	950.4	954	960	957.2	954.9	949.6	949.8	950.2	951.1	953.9	953	954.3	955.3	953.4	939.6	929.7	800.2	0.0013121	1.70015e-05	0.00129509	76.1751	18.8181
249a	HU	2013	0.68	949.1	812.5	1945.3	937.5	1281.3	1726.6	768.9	888.9	935.6	954.7	960.1	956.1	954.3	945.8	942.2	945.7	942.7	939.4	937.4	933.1	929.9	927.9	927.6	928.3	922.8	858.6	0.00105433	7.69975e-06	0.00104663	135.93	21.3331
249a	HU	2013	0.68	939	789.1	1937.5	937.5	1359.4	1734.4	752.7	862.4	900.7	941.7	946.3	946.1	946.7	948.6	951.9	950.4	946.7	952	954.5	954.1	952.2	940.6	955.1	945.9	916.8	1515.3	0.00108307	2.6509e-06	0.00108042	407.568	26.102
249a	HU	2013	0.68	949	781.3	1945.3	937.5	1304.7	1726.6	757.6	871.1	927.8	953.3	954.6	954.1	956.8	957.1	955.9	955.4	954	958.3	958.1	960	957.8	959.3	950.7	950	922.2	1568.4	0.00128241	2.47109e-05	0.0012577	50.8966	17.0669
249a	HU	2013	0.688	914.4	609.4	1898.4	898.4	1109.4	1718.8	773	859.5	903.5	912.7	913	914.6	918.4	917.9	934.4	933.7	932.6	933.4	935.6	933.2	928.7	928.8	929.3	928.9	917.4	851.2	0.000612546	2.79265e-06	0.000609754	218.342	23.3914
249a	HU	2013	0.68	921.4	789.1	1914.1	914.1	1234.4	1726.6	784.3	870.5	906.5	923.3	932.5	938	935.6	934.6	935.5	935.3	939.3	942.3	941.6	937.6	933	934	934.1	933.2	922.4	858.1	0.000598677	4.63828e-06	0.000594038	128.073	21.0746
249a	HU	2013	0.664	927.4	773.4	1914.1	921.9	1304.7	1726.6	795.8	878.2	913.5	938.3	942.3	943.6	940.7	942.9	941	937.6	942	943	938.5	939.2	941.2	939.4	940.5	941.8	933.2	859.8	0.000560724	4.4246e-07	0.000560282	1266.29	31.0253
249a	HU	2013	0.68	934.8	796.9	1937.5	921.9	1210.9	1726.6	1569.3	882.5	917.5	946.5	947.3	946.2	947.7	946	944.1	947.2	943.3	946.1	949.7	949.7	946.4	950.5	952.7	949.1	921.5	790.2	0.000700036	8.98847e-06	0.000691047	76.8815	18.8582
249a	HU	2013	0.672	918.1	773.4	1898.4	921.9	1437.5	1742.2	726.3	858.4	888.4	922.4	922	917.8	906.6	907.4	910.4	913.3	925.1	930.8	926.8	927.2	932.4	929.2	932.2	927	914.2	856.1	0.000859927	5.12588e-06	0.000854801	166.762	22.221
249a	HU	2013	0.648	919.1	796.9	1921.9	914.1	1117.2	1742.2	820.3	884.7	910.4	923.8	929.7	929.3	926.7	927.1	931.8	936.1	940.4	940.5	940.6	942.8	944.2	944.4	945.5	943.1	930.7	892.3	0.000917347	5.96776e-07	0.000916751	1536.17	31.8644
249a	HU	2013	0.664	943.6	796.9	1929.7	914.1	976.6	1703.1	808.6	894.1	932.6	945.2	946.9	947.7	945.5	944.6	947.7	950.3	951.8	946.3	940.3	937.9	935.9	938.8	938.6	936.9	925.9	797.6	0.000533848	4.68667e-06	0.000529161	112.908	20.5272
249a	HU	2013	0.656	934.1	796.9	1929.7	929.7	1164.1	1726.6	785.1	888.5	911.5	931.9	939	944	942.6	942	943	943.8	947.6	945.6	948.5	947	948.4	950.6	951.5	947.1	928.5	870.1	0.000908266	4.09908e-06	0.000904167	220.578	23.4356
249a	HU	2013	0.672	916.5	781.3	1914.1	906.3	1007.8	1726.6	784.3	869.9	896.3	910.3	915.6	914.7	912.7	916	919	919	918.8	921.5	923.5	926	938.8	940.2	940.9	937.4	927.3	824.5	0.000719044	5.12546e-06	0.000713919	139.289	21.4392
249a	HU	2013	0.672	928.7	562.5	1921.9	914.1	984.4	1734.4	737	867.4	892.8	904.6	912.8	911.5	912.4	909.6	907.2	908.4	922.5	928.3	926.2	931.7	933.8	942.6	946	928	918.6	901.6	0.00087733	1.29017e-05	0.000864428	67.0009	18.2608
0552	HU	2014	0.608	1010.9	515.6	1070.3	867.2	984.4	1039.1	548.1	708	732.1	789.1	830.9	853.5	928.1	543.6	946.9	962.9	976.8	989.2	998.6	1002.3	999.1	1012.6	1014.7	1024	975.5	1027.2	0.000104512	5.65615e-06	9.8856e-05	17.4776	12.4248
0552	HU	2014	0.512	1005.2	726.6	1054.7	875	984.4	1039.1	752.5	765.6	810.6	839.6	865.6	570.5	949.8	956.3	962.9	976.5	987.8	999.7	1011.7	1008.2	1006	814.7	1001.9	1012.1	1004.8	947.2	0.000108479	8.37804e-06	0.000100101	11.948	10.7729
0552	HU	2014	0.464	988.1	507.8	1820.3	898.4	984.4	1265.6	799.8	778.9	852.1	878.7	898.7	924.5	932.2	948.2	959.2	974	987.7	987.5	991.8	995.2	996.3	999.9	991.9	974.4	958.2	921.7	6.37942e-05	1.35848e-05	5.02094e-05	3.69599	5.67731	-15
0552	HU	2014	0.504	981.9	507.8	1789.1	867.2	968.8	1210.9	963.9	752.8	769.9	818.7	848.6	873.9	906.5	927.5	932.9	718.9	939.5	956.4	974.2	981.1	985.1	990.2	563.4	582.3	564.4	930.5	4.67209e-05	8.72976e-06	3.79912e-05	4.35192	6.38681	-10
0552	HU	2014	0.456	995.2	773.4	1828.1	914.1	992.2	1125	780	827.2	782.8	886.7	916.6	936.7	946	953.5	964.8	970	981.1	976.4	992.5	983.9	1003.8	1016.9	1001.4	990.6	971	925.6	4.42381e-05	3.9001e-06	4.0338e-05	10.3428	10.1464	-15
0552	HU	2014	0.52	992.4	648.4	1835.9	875	968.8	1093.8	720.5	778.3	813.5	848	872.1	890.5	904.3	917.7	941.7	959.6	970.8	977.7	988.9	1003.7	1011.7	575.1	1005.8	1010	1005	987.8	1.77761e-05	1.82567e-06	1.59505e-05	8.73677	9.41351
0552	HU	2014	0.472	995.8	546.9	1062.5	898.4	976.6	1031.3	793.9	823.8	857.8	879.3	893.8	901.7	582.5	933.8	952.9	956.1	974.4	971.3	983.4	988.8	1000.7	1016.9	1018.5	1023.1	1015.5	513.1	3.95054e-05	8.99981e-07	3.86054e-05	42.8958	16.3241
0552	HU	2014	0.44	999.2	796.9	1812.5	921.9	992.2	1031.3	820.2	842	860.5	887.5	899.1	932	949.1	962.3	974.9	977.8	983.5	989.5	999.7	1011.1	1016	1013.7	1010.4	1013.7	1004.8	981	5.19676e-05	2.20727e-06	4.97604e-05	22.5439	13.5303
0552	HU	2014	0.424	1002.3	804.7	1085.9	937.5	1000	1046.9	828.2	846.2	882.9	907.8	931.2	947.1	962.1	973.1	987.3	993	1007.6	1021.3	1025.9	1026.1	1037.2	1044.9	1039.6	1045.9	1030.2	1000.8	5.19259e-05	1.62583e-06	5.03e-05	30.938	14.9049
0552	HU	2014	0.448	1002.9	539.1	1750	921.9	1000	1046.9	824.6	845.4	875	906.3	949.5	961.9	964.7	978.6	985.4	997	1007.7	1009.5	1006.9	1010.9	1014.8	571.3	537.8	1018.4	998.4	981.2	7.57562e-05	9.20991e-06	6.65463e-05	7.22551	8.58869
0552	HU	2014	0.456	1009.1	804.7	1750	953.1	1015.6	1070.3	823.5	847.8	863.3	942.9	956.9	980.3	998.8	1014.4	1022.8	1028.3	1027.8	1032.7	1037.4	1046.2	1059	1059.6	1059	1053.5	1022.3	988.5	6.23666e-05	7.73535e-07	6.15931e-05	79.6254	19.0105
0552	HU	2014	0.504	566.5	507.8	1734.4	585.9	773.4	1070.3	843.9	859	943.3	966.1	993.1	1008.7	1018.5	1028.8	624.6	519.6	560.1	571.5	528.4	541.4	531.1	532	529	1067.8	562.7	535.5	0.000302771	8.78553e-07	0.000301893	343.625	25.3608
0552	HU	2014	0.448	1008	820.3	1750	968.8	1023.4	1070.3	839.9	860.8	868.2	969.5	978	993.5	1007.4	1021.9	1035.9	1036.9	1044.2	1051.4	1061.7	1062.4	1055.3	1047.4	1048	1052.4	1037.2	994.8	8.52188e-05	9.86555e-07	8.42322e-05	85.3801	19.3136
0552	HU	2014	0.448	1069.5	835.9	1742.2	976.6	1031.3	1078.1	846.8	857.7	950.5	976.2	994.5	1002.4	1015.2	1030.7	1030	1033.3	1044	1047.4	1054.5	1063.9	1069	1071.7	0	1067.6	1040	991.6	0.00010691	1.25389e-06	0.000105656	84.2631	19.2564
0552	HU	2014	0.448	1010.7	812.5	1750	968.8	1023.4	1070.3	841.5	861.7	956.6	967.5	997	1007.4	1023.7	1029.7	1037.5	1044.6	1048.3	1040.1	1040.6	1047.6	1049.2	1052.8	1049.1	1057.7	1040.3	995.6	8.01943e-05	1.83195e-06	7.83623e-05	42.7754	16.3119
0552	HU	2014	0.512	1007.9	523.4	1742.2	882.8	1000	1070.3	817	841	871.8	864.3	852.2	540.6	534.4	530	802.3	1006.2	572.3	548.5	613.8	596	593.4	599.8	594.9	596.3	589.5	569.2	6.61549e-05	3.5562e-06	6.25987e-05	17.6027	12.4558
0552	HU	2014	0.44	1062	812.5	1789.1	968.8	1031.3	1085.9	769.3	843.6	863.7	883.2	961.2	982.7	979.6	985.9	995.1	1005.4	1010.9	1024.6	1042.4	1047.8	1052.8	1062.6	1066.6	1068.8	1057.1	989.5	7.5599e-05	1.09517e-06	7.45038e-05	68.0297	18.327
0552	HU	2014	0.472	1061	804.7	1750	968.8	1023.4	1078.1	831.7	855.9	872.4	970.8	978.3	986.7	991.4	999.1	1007.3	1015.5	1032.3	1038.6	1045.6	1055.3	1064.4	1065.3	1065.5	1054.9	1036.8	986.1	0.000131436	1.96821e-06	0.000129468	65.7793	18.1809
0552	HU	2014	0.48	1010.2	812.5	1703.1	960.9	1015.6	1070.3	830.5	851.6	900.8	952	949.4	966	973.4	1003.7	1015.3	1027.3	1042	1047.6	1051.5	1057.9	1050.1	1050	1054.4	1062.6	1047	988.8	0.000134718	4.47511e-06	0.000130243	29.1039	14.6395
0552	HU	2014	0.464	1058.1	585.9	1109.4	937.5	1007.8	1070.3	823.4	848.6	881.2	949.9	962.2	966.4	986.9	1002.7	1013.3	1022.9	1037.5	1044.9	1051.2	1059.5	1067.1	1065	1070	612	630.7	990.9	2.65478e-05	1.2483e-06	2.52995e-05	20.2672	13.0679
0552	HU	2014	0.44	1003.7	539.1	1742.2	945.3	1007.8	1054.7	832.3	852	927.7	558.2	970.9	971.9	985.3	1002.1	1013.4	1025.2	1030.7	1035.2	1028.6	1031.2	1040.6	1048.5	1054.4	1054.2	1030.3	992.6	7.07382e-05	9.32339e-07	6.98059e-05	74.8718	18.7432
0552	HU	2014	0.416	580.6	500	1484.4	585.9	890.6	1085.9	575.3	977.1	982.4	992.2	996.9	1017.8	1033.3	1028.9	1027.2	1031.7	1044.5	529.7	591.3	570.8	540.7	599.7	600.9	584.7	531.2	536.1	0.000418277	2.46452e-06	0.000415812	168.719	22.2716
0552	HU	2014	0.576	673.9	515.6	1750	734.4	1000	1148.4	848.7	945	965.7	974.5	974.2	1016.1	1046.4	1048.3	600.5	675.9	1060.3	1061.6	1063.7	1063.3	587.8	999.1	1052.6	674.4	680.7	669.4	0.000193947	1.07521e-05	0.000183195	17.038	12.3142
0552	HU	2014	0.472	1004	820.3	1773.4	953.1	1015.6	1070.3	844.3	866.3	904.9	950.4	968.5	993.8	1003.7	1015.8	1020	1021	1026.5	1028.4	1037.1	1041.3	1041.2	1050.5	1052.7	1049.4	1033.4	995.9	0.000105838	1.77146e-06	0.000104067	58.7463	17.6898
0552	HU	2014	0.432	1010.2	843.8	1781.3	960.9	1015.6	1062.5	876	879.5	958.6	972.9	975.8	977.5	985.7	1000	1011.8	1016.3	1018.4	1018.5	1024.3	1029.4	1038.5	1045.9	1037.3	1022.4	991.9	940.6	9.44654e-05	1.18874e-06	9.32767e-05	78.467	18.9469
0552	HU	2014	0.416	1003.7	804.7	1750	960.9	1015.6	1054.7	841	856.5	894.1	970.6	978.8	982.4	986.8	994.5	1001.8	1020.6	1019.2	1018.4	1021.6	1030.4	1034.2	1040.1	1040.7	1029	1005.3	955.3	7.53314e-05	1.53901e-06	7.37924e-05	47.948	16.8077
0552	HU	2014	0.4	1003.7	828.1	1742.2	960.9	1015.6	1070.3	849.7	856.4	867.9	949.6	967.4	974.5	980.8	987.7	995.3	1002.6	1020.8	1029	1036.3	1040.9	1046.9	634	1061.8	1067.9	1062.9	1000.8	7.27468e-05	1.12757e-06	7.16192e-05	63.5166	18.0289
0942	HU	2013	0.52	874.9	757.8	929.7	835.9	875	906.3	783.4	824.6	845.9	865.4	875.9	885.7	889.3	887.9	883.3	880	874.3	870.1	863.4	861.8	861.4	850.9	842.6	834.1	823.4	738.8	0.00165352	8.23266e-08	0.00165343	20083.8	43.0285
0942	HU	2013	0.504	881.6	757.8	937.5	835.9	875	906.3	784.6	826.9	850.1	867.3	883.8	895.3	896.7	893.5	887.2	883.7	879	873.7	869	862.1	860.8	859.5	843.6	832.9	820	742.6	0.00161324	1.70986e-08	0.00161323	94348.4	49.7473
0942	HU	2013	0.512	875.2	718.8	929.7	828.1	875	898.4	800.5	831.2	851.3	870.5	880.2	886.9	890.2	887.4	883.6	877	872.3	865.4	861.2	861.1	856.6	845.3	833.9	814.1	788.4	704.6	0.00153264	1.45533e-08	0.00153263	105311	50.2247	-20
0942	HU	2013	0.504	882.5	765.6	937.5	843.8	882.8	914.1	791.7	829.8	852.8	869.7	885.9	897.4	898	893.1	888.2	884.2	878.3	874.2	869.5	862.3	855.7	850.7	857.9	854.4	837	743.3	0.001708	1.90118e-08	0.00170798	89837.9	49.5346	-10
0942	HU	2013	0.504	872.2	710.9	921.9	820.3	867.2	898.4	738	821.2	840.8	854.6	871.9	881.1	886.6	883.1	879.6	874	866.8	862.2	855	842	832	819	803.5	787.2	778.4	702.6	0.00142116	1.75748e-08	0.00142114	80862.5	49.0775	-20
0942	HU	2013	0.488	878.2	757.8	929.7	835.9	875	906.3	794.5	831.2	850.6	862.3	873.4	884.5	891.3	887.2	879.6	874.7	867.6	864.5	865	861.5	853.9	841.1	833.7	823.6	816.3	762.8	0.00158067	4.11232e-08	0.00158063	38436.5	45.8474
0942	HU	2013	0.488	877.6	757.8	937.5	835.9	875	906.3	791.6	828.9	850.4	865.3	875	888	896.3	897	889.3	881.4	875.9	869	863.3	853	843.5	830.7	821.2	819	814.3	754	0.00150833	3.55828e-08	0.00150829	42388.3	46.2725
0942	HU	2013	0.496	881.2	750	937.5	835.9	875	906.3	791.5	829.3	850.1	865.1	881.1	890.6	895.8	892.8	885.1	881.2	877.1	872.1	862.8	855.3	848.2	845.5	836.4	824.6	810.9	757	0.00148376	2.22635e-08	0.00148373	66644.2	48.2376
0942	HU	2013	0.488	876.5	765.6	929.7	843.8	875	906.3	801.5	834.7	853.7	866.8	877.5	888	892.5	892.5	889.1	887	882.7	878.4	871	864.2	858	846.2	846.2	852.9	845.8	757.5	0.00181629	1.88581e-08	0.00181627	96312.2	49.8368
0942	HU	2013	0.48	885.1	781.3	953.1	851.6	890.6	921.9	735.4	836.1	855.8	872.1	887.4	904.4	912.2	907.3	901.7	895.9	895	0	891.9	881.9	877.8	872.5	864.2	854.6	846	746.2	0.00180014	1.75917e-08	0.00180013	102328	50.0999
0942	HU	2013	0.48	885	773.4	953.1	851.6	882.8	914.1	797.7	834.4	855.1	873.4	884.8	900	909.6	906.7	901.5	897.8	893.7	888.6	883.8	886.6	883.6	873.8	864.4	857.4	842.8	754.3	0.00175945	1.59694e-08	0.00175944	110175	50.4208
0942	HU	2013	0.48	885.2	757.8	945.3	843.8	882.8	914.1	800.8	837.1	858.3	874.9	888.6	901.8	906.4	904.4	899.9	896.8	893.5	895.5	897.8	888.9	877.3	870.5	862.5	854.5	836.3	762.8	0.00184761	1.96351e-08	0.00184759	94096.3	49.7357
0942	HU	2013	0.48	877.3	765.6	937.5	843.8	882.8	906.3	790.9	829.9	850.5	864.4	877.2	887.8	895.7	895.8	892.3	890	893.7	892.4	885.5	874.4	866.9	861.7	852	843.5	837.1	753.5	0.00175185	1.85408e-08	0.00175183	94485.4	49.7536
0942	HU	2013	0.48	874.4	757.8	929.7	835.9	875	898.4	790.6	829	846.5	859.7	873.5	881.7	887.6	888.8	888.9	886.8	882.4	878.7	881.3	879.2	873	864.6	855.3	841.6	828	742.8	0.0017016	1.86726e-08	0.00170159	91127.6	49.5965
0942	HU	2013	0.472	890	765.6	945.3	851.6	882.8	914.1	806.7	837.8	858	875.5	892	904.2	906.9	903.9	901.1	896.7	892.9	893.9	893.3	888.4	879.9	870	860.3	849.1	837	746.6	0.00189659	1.61712e-08	0.00189657	117280	50.6923
0942	HU	2013	0.48	898.2	773.4	945.3	851.6	882.8	921.9	748.7	835.9	856.4	874.9	893.5	905.2	909.9	908.4	904.8	902	897	897.8	898.7	889.6	881.3	873.5	863.7	852.7	836.6	753.8	0.00192317	1.77948e-08	0.00192316	108074	50.3372
0942	HU	2013	0.472	885.2	773.4	945.3	851.6	882.8	914.1	790	830.1	852.1	868.4	882.1	896.9	906.5	907	900.5	896.4	892.4	888.9	887.1	889.2	887	878	867.3	857.7	844	750	0.00188773	1.92635e-08	0.00188771	97994.3	49.912
0942	HU	2013	0.48	884.5	765.6	945.3	843.8	882.8	914.1	745.3	835.3	857.9	877.3	891.2	898.4	902.8	901.7	898.9	899	897.1	893.7	888.3	878.1	871.2	863	853.9	854.5	848.4	742.8	0.00181669	1.49792e-08	0.00181667	121280	50.8379
0942	HU	2013	0.488	893.9	734.4	945.3	843.8	882.8	914.1	748.7	832.8	853.1	872.4	889.6	904.3	908.1	902.7	897.7	894.1	886.8	882.6	882.2	886	882.5	871.2	860.5	851.3	832.9	741.1	0.00142427	1.38488e-08	0.00142425	102843	50.1218
0942	HU	2013	0.496	899.2	757.8	953.1	843.8	882.8	921.9	791.6	832.3	854.3	873.1	897.6	907	911.8	910.4	901	903.4	904.5	900.6	893	884.6	877.9	869.7	863.5	869.2	863.5	742.4	0.00161478	1.61703e-08	0.00161477	99859.9	49.9939
0942	HU	2013	0.488	900.9	742.2	960.9	843.8	890.6	921.9	786.9	832.1	854.5	872.2	886.8	906.5	912.1	917.9	913.6	905.5	900	896.1	890.6	882.3	875.2	875.3	876.8	863.1	840.5	712	0.00153692	1.46525e-08	0.00153691	104891	50.2074
0942	HU	2013	0.488	897.8	718.8	945.3	843.8	882.8	914.1	735.4	837.3	859.5	877.9	892.4	906.7	910	908.7	903.2	895.5	886.4	890.3	891.9	886.6	876.9	864.4	855.7	844.7	828.2	710.7	0.00145633	1.56981e-08	0.00145631	92769.7	49.6741
0942	HU	2013	0.496	899.5	703.1	953.1	843.8	882.8	921.9	786.2	830.1	852.3	871.7	892.4	906.2	913.5	912.1	902.9	900.5	897.3	891.3	881.5	876.2	869.9	862.1	854.6	853	830.8	702.8	0.00151455	3.04584e-08	0.00151452	49724.2	46.9657
0942	HU	2013	0.488	899.8	710.9	953.1	843.8	882.8	921.9	792.5	832.3	854.4	871.8	888.3	909.9	915.5	913.1	903	896.1	891.5	886	880.5	878.3	885.7	878.5	868.8	855.4	834.3	710	0.00137991	1.5703e-08	0.00137989	87874.2	49.4386
0942	HU	2013	0.488	898.3	742.2	945.3	843.8	882.8	914.1	786	829.8	855.8	875.6	897.4	909	910.8	908.5	902.4	898.1	901.4	901.2	897.8	889.8	879	868.8	858.8	847.4	839.8	713.4	0.00150642	1.50721e-08	0.00150641	99947	49.9977
0942	HU	2013	0.488	901.6	710.9	960.9	843.8	890.6	921.9	787.5	830.1	853.5	872.9	890.6	911.3	909.6	908.2	900.2	896.6	892.5	887.8	889.6	889.9	885.4	872.7	864.5	853.9	831.3	704.8	0.00138807	1.37661e-08	0.00138805	100831	50.0359
1973	HU	2013	0.496	1060	921.9	1109.4	1007.8	1054.7	1078.1	914	914.2	945.5	952.4	976	999.8	1027.8	1034.6	1047.1	1046.6	1052.9	1050.6	1059.4	1062.8	1061.7	1064.7	1071.5	1071.4	1063.9	1063.4	0.000108196	1.3102e-07	0.000108065	824.802	29.1635
1973	HU	2013	0.544	1016.1	898.4	1257.8	984.4	1031.3	1085.9	845.1	921.5	935.3	938.9	953.7	945.3	982.4	1007.5	1017.5	1008.9	1048	1059.4	1062.1	1067.5	1061.8	1065.2	1067.7	1056.7	1069.1	1058.9	7.93355e-05	8.18549e-08	7.92536e-05	968.221	29.8597
1973	HU	2013	0.504	1043.1	898.4	1890.6	992.2	1039.1	1148.4	895.7	907.9	909.2	918.8	940.3	948.6	960	973.1	976.5	983.6	997.5	1011.8	1021.5	1028	1038.5	1046.8	1048.5	1050.9	1041.4	1063.9	0.00119746	8.90869e-07	0.00119657	1343.15	31.2813	-20
1973	HU	2013	0.624	1016.7	882.8	1906.3	976.6	1039.1	1562.5	551.8	866.6	885.6	893.2	911.2	925.1	942.7	959.7	968.8	974.6	991.5	1006.3	1010.5	1017.7	1023.6	1035.5	1029.4	1019	1041.1	1027.7	0.000974836	3.23163e-05	0.00094252	29.1655	14.6487	-10
1973	HU	2013	0.512	1021	812.5	1906.3	953.1	1023.4	1593.8	813.5	871.3	873.2	887.7	902	917.2	928.7	944.2	954.9	960.8	966.3	974.8	983.2	995.8	1004.2	1020.1	1022.1	1027.6	1025	1025.4	0.000614319	1.25063e-05	0.000601813	48.1208	16.8233	-15
1973	HU	2013	0.504	1044.9	851.6	1890.6	968.8	1039.1	1156.3	882.7	914.1	918.4	926.7	944.3	956.7	967	984.5	990.3	1001.2	1015.4	1024.6	1030.2	1037.5	1042.4	1047	1058.5	1055.7	1044.7	1038.1	0.000981613	8.72969e-07	0.00098074	1123.45	30.5055
1973	HU	2013	0.504	1044	882.8	1898.4	968.8	1039.1	1140.6	879.6	933.8	936.4	941.6	958.2	969.4	988	1001.1	1008.5	1019.6	1023.6	1030.2	1037.4	1044.7	1051.8	1050.3	1047.9	1049.5	1039.7	520.2	0.00109985	7.25963e-07	0.00109913	1514.03	31.8013
1973	HU	2013	0.536	1045.5	882.8	1109.4	976.6	1039.1	1132.8	878.9	935.4	940	949.7	962.1	978.4	995.3	1005.1	1014.1	1022.1	1030.3	1036.3	1040.2	1041.2	1050.5	1055.9	1058.4	1046.5	1038.3	1053.7	0.000937318	1.73323e-05	0.000919985	53.0794	17.2493
1973	HU	2013	0.512	1046.6	851.6	1890.6	960.9	1031.3	1085.9	879.7	913.9	923.2	933.4	951.3	961	979.6	990.6	998.4	1008.8	1021.9	1020.9	1027.6	1033.4	1044.1	1057.3	1061.3	1043.4	1030.6	955.1	0.00084018	2.12776e-06	0.000838052	393.865	25.9535
1973	HU	2013	0.496	1048.1	882.8	1890.6	968.8	1039.1	1093.8	886.1	926.5	934.4	940.7	963.6	978.9	1000	1017.2	1027.9	1031.2	1032.8	1040.2	1044.1	1046.4	1051.1	1055.6	1057.9	1051.6	1045.7	1048.4	0.00111071	2.45877e-06	0.00110825	450.733	26.5392
1973	HU	2013	0.488	1044.8	867.2	1898.4	968.8	1031.3	1078.1	890.4	921.9	927.4	935.8	948.4	967.3	984.3	997.9	1008.2	1016.6	1029.2	1035.4	1036.5	1041.4	1047.6	1052.7	1053.7	1050.8	1040.6	1041.6	0.00126235	1.07331e-06	0.00126128	1175.12	30.7008
1973	HU	2013	0.496	1047.1	867.2	1882.8	968.8	1031.3	1085.9	890.2	925	923.4	927.2	950.6	964.7	981.8	1001.5	1016.3	1023.8	1028	1033.5	1038.2	1046.8	1056.7	1059	1055.3	1053.3	1041.7	1045.3	0.00119159	1.48881e-05	0.0011767	79.0364	18.9783
1973	HU	2013	0.504	1050	898.4	1101.6	976.6	1039.1	1085.9	882.9	938.8	948.8	952.2	969.1	989.8	1007.9	1027.9	1032	1034.8	1042	1045.5	1049	1055.5	1062.4	1064.4	1063	1054	1039.2	1043.7	0.00124933	9.81631e-06	0.00123951	126.271	21.013
1973	HU	2013	0.488	1049.4	898.4	1101.6	976.6	1039.1	1085.9	886.8	943.5	950.2	952.6	965.8	991.7	1012.6	1025.7	1035	1038.9	1039.8	1044.2	1053	1055.8	1060.5	1065.9	1062	1056.5	1041.5	951.8	0.00124154	1.94377e-07	0.00124135	6386.27	38.0525
1973	HU	2013	0.488	1062.3	867.2	1109.4	968.8	1039.1	1085.9	907.7	939.5	948.2	956.4	976.1	1009.9	1042.7	1049.9	1053.8	1051.3	1054.5	1058.1	1058.9	1058.9	1062.8	1069.6	1072.4	1068.1	1052.1	1000.8	0.00112764	6.63554e-07	0.00112698	1698.4	32.3004
1973	HU	2013	0.48	1071.2	867.2	1906.3	968.8	1039.1	1093.8	906.3	933.8	941.2	948.9	967.1	991.4	1025.1	1051.5	1057.5	1055.6	1058	1061.4	1066.3	1070.4	1074.4	1079.1	1079.8	1076.3	1054.9	874.8	0.00116528	1.16873e-07	0.00116516	9969.51	39.9867
1973	HU	2013	0.464	1001.4	812.5	1890.6	945.3	1007.8	1625	823.6	835.2	841.8	842.7	887.9	907.2	917.8	932.5	941.8	954	963.5	974.3	982.3	989.6	993.8	1001.5	1009.2	1011.7	1012.9	1018.7	0.000731971	1.03637e-06	0.000730935	705.284	28.4836
1973	HU	2013	0.512	1021.2	867.2	1851.6	976.6	1031.3	1085.9	853.8	894.6	902	914.7	933.5	956.4	985.5	1006.6	1013.4	1029.6	1044.5	1058.9	1067.4	1073	1079.1	1075.8	1072.5	1065.5	1056.9	1015.2	0.000629077	2.34875e-06	0.000626728	266.835	24.2624
1973	HU	2013	0.504	1022	882.8	1101.6	976.6	1023.4	1070.3	902.2	936.9	945.7	950.2	962.9	983.7	1007.1	1027.7	1050.5	1057.4	1059.4	1059.6	1065.1	1067.5	1068.1	1070.3	1065.1	1057.4	1042.7	1021	0.000677057	2.91661e-06	0.000674141	231.138	23.6387
1973	HU	2013	0.512	1016.2	867.2	1898.4	968.8	1023.4	1078.1	894.2	868.4	936.4	952.5	964.6	986.6	1025.2	1050.9	1051.5	1049	1051.8	1047.6	1056.5	1058.6	1059.3	1059.9	1059.7	1056	1030.4	1017.2	0.000560798	1.50491e-06	0.000559293	371.646	25.7013
1973	HU	2013	0.52	1022.4	875	1890.6	968.8	1023.4	1070.3	894.7	927.8	935.1	940.1	959.4	984.6	1014.1	1037.5	1058.9	1059.8	1050.8	1048.1	1054.2	1057.8	1060.4	1059.2	1056.7	1038.5	1019.2	903.2	0.000637965	4.2342e-06	0.000633731	149.67	21.7513
1973	HU	2013	0.52	1014.7	875	1085.9	976.6	1015.6	1062.5	917.2	940.1	941.4	952.4	971	997.6	1019.2	1033	1038.8	1043.3	1051.4	1049.5	1051.8	1052.7	1052.4	1049.7	1047.9	1031.5	1013.7	909.4	0.00073526	8.94371e-06	0.000726316	81.2098	19.0961
1973	HU	2013	0.528	993.7	851.6	1882.8	953.1	1007.8	1265.6	877	908.9	917.5	927.2	942.1	962.1	975.5	986.5	1002	1014.8	1018.7	1022.6	1028.1	1029.9	1036.1	1038.7	1038.5	1027.1	1007.8	976.4	0.000774879	1.12751e-05	0.000763604	67.7247	18.3075
1973	HU	2013	0.52	993.7	851.6	1890.6	953.1	1007.8	1171.9	873.8	908.5	928.6	938.7	953.3	968	980	994.6	1013.3	1018.3	1020.2	1025.9	1030.5	1043.2	1039.4	1044.1	1042.7	1023	1001.2	975.1	0.000679627	1.28226e-06	0.000678344	529.024	27.2348
1973	HU	2013	0.52	993.2	859.4	1890.6	960.9	1007.8	1070.3	891.4	923.8	933.7	948.6	961.7	982.4	999.5	1019.1	1035.3	1039	1036.3	1039.7	1042.3	1048.8	1046.3	1044.3	1041.5	1025.1	1001.9	956	0.000722896	1.52534e-06	0.000721371	472.924	26.7479
1973	HU	2013	0.504	992.8	851.6	1882.8	960.9	1007.8	1070.3	892.7	916.9	924.5	933.4	958.8	974.6	987	999.5	1009.5	1018	1026.7	1037.6	1046.2	1051	1051.9	1054.4	1050.2	1033.4	1006.4	902.5	0.000785974	1.88598e-07	0.000785786	4166.45	36.1977
1973	HU	2013	0.52	993.1	859.4	1898.4	968.8	1023.4	1078.1	897.5	928.8	939.3	945.6	962	977.9	992.5	1007.2	1019.8	1021.9	1032.1	1035.7	1039.2	1042	1049.6	1058.7	1062.4	1037.4	993.1	900.3	0.00087471	1.49631e-06	0.000873213	583.576	27.661
1973	HU	2013	0.512	1000.1	859.4	1898.4	960.9	1015.6	1078.1	891.5	909.3	937.7	948.5	962.5	976.9	993.4	1009.1	1020.8	1027.5	1031	1039.3	1050.9	1058.2	1061.6	1063.2	1061	1038.8	1022.7	1015.4	0.000769016	1.68144e-06	0.000767335	456.356	26.593
1973	HU	2013	0.504	1021.5	875	1875	968.8	1023.4	1070.3	895.6	868.6	923.5	930.4	953.9	965.8	984.5	1011.8	1024.3	1032.1	1048	1051.6	1055.2	1061.3	1063.2	1067.7	1057.2	1042	1020.5	1008.9	0.000650767	2.46211e-06	0.000648305	263.313	24.2047
1973	HU	2013	0.488	1022.8	875	1890.6	976.6	1023.4	1070.3	909.1	932.9	935.9	944.2	964.5	999.9	1020.3	1040.4	1049.8	1053.3	1056.2	1058.7	1059.6	1061.8	1063	1065.1	1063.4	1057.3	1020.1	895.3	0.000621106	3.848e-07	0.000620721	1613.1	32.0766
1973	HU	2013	0.472	1015.7	867.2	1898.4	968.8	1031.3	1085.9	869.1	929.8	937.1	947.4	967.8	1004.3	980.6	1036.2	1066.1	1067.4	1070.3	1075.4	1075	1070.7	1069.2	1065.2	1061	1049.9	1016.4	892.6	0.000592685	7.04799e-08	0.000592614	8408.27	39.2471
1973	HU	2013	0.48	1057	781.3	1117.2	968.8	1031.3	1078.1	874.6	904.3	927.3	934.8	955.2	971.1	1005.2	1038.7	1051.6	1050.2	1055.2	1057.6	1059.5	1066.2	1077.2	1079.3	1075.4	1064.7	1033	897	0.000421355	1.11483e-07	0.000421243	3778.53	35.7732
breb	CZ	2014	0.544	1004.9	812.5	1859.4	945.3	1007.8	1101.6	897.4	919.3	911.2	927.8	962	962	984.8	989	986.8	1003.3	1015.1	1016.3	1013.2	1010.8	1020.5	1024.6	1017.3	1002.9	1015.9	1044.7	4.33224e-05	7.62426e-07	4.25599e-05	55.8217	17.468
breb	CZ	2014	0.568	1035.7	828.1	1140.6	953.1	1023.4	1070.3	906.4	938.9	937.5	949.2	967.3	990.7	989.7	1007.1	1005.4	1015.4	1015.1	1023.9	1041.9	1047.7	1049.8	1042.9	1046.6	1045.9	1039.5	546.4	2.85637e-05	9.03345e-07	2.76604e-05	30.6199	14.86
breb	CZ	2014	0.656	1030.1	781.3	1546.9	945.3	1015.6	1101.6	907.5	934.9	933.7	945.9	968.2	989.8	990.9	996.4	1013.8	1028	1029.8	1020.5	593.7	1034.6	1038.9	1037.2	1042.7	1030.9	1036.5	1037.3	1.87235e-05	1.89672e-06	1.68268e-05	8.8715	9.47997	-20
breb	CZ	2014	0.584	982.6	750	1117.2	929.7	984.4	1062.5	915.5	948.7	940.7	950.7	968.9	976.7	973.8	977.4	988.4	991.4	986.5	984.5	986.2	986.3	981.2	978.9	568.7	572.1	559.2	1008.2	2.29249e-05	6.12565e-07	2.23123e-05	36.4244	15.6139	-10
breb	CZ	2014	0.584	986.4	796.9	1859.4	937.5	1000	1210.9	853.5	888	869.9	888.9	911.4	919.9	937.3	947.1	942.6	959	968.5	982.7	983.6	1001.6	997	989.7	980.8	970.8	980.1	970.4	5.50349e-05	2.2802e-06	5.27547e-05	23.136	13.6429	-15
breb	CZ	2014	0.584	1004.4	742.2	1859.4	906.3	992.2	1062.5	818.8	877.2	867	890.6	917	947	954	956.1	977.4	983.7	992.2	1000.2	1003.9	1008.9	1013.5	1021.4	1010.2	991.2	997.1	625.9	3.95725e-05	2.38236e-06	3.71902e-05	15.6107	11.9342
breb	CZ	2014	0.624	1033.4	867.2	1890.6	968.8	1031.3	1140.6	902	910.8	921.3	942.8	954.1	964.6	980.1	987.5	987.9	1009.3	1020.9	1037.7	1042	1044.5	1039.7	1036.1	1021.1	1017.9	1028.2	1037.4	6.17174e-05	4.10021e-06	5.76172e-05	14.0522	11.4775
breb	CZ	2014	0.6	994.8	828.1	1804.7	929.7	992.2	1078.1	882.5	914.6	894.6	908.4	929.4	942.4	967.7	983	985.1	988.1	997.7	1000.3	1000.6	1002.9	999.4	990.7	980.7	970.9	1004.1	1001.8	2.18691e-05	1.22017e-06	2.06489e-05	16.9229	12.2848
breb	CZ	2014	0.616	1007.3	804.7	1898.4	945.3	1015.6	1218.8	881.4	906.3	893.4	908.8	927	936	947.1	960	966.6	975.1	990.2	991.4	1008.2	1015.8	1029.6	1029.7	1014.2	1014.9	1012.4	1006.2	3.78207e-05	3.55425e-06	3.42664e-05	9.64096	9.8412
breb	CZ	2014	0.64	1014.9	765.6	1890.6	945.3	1015.6	1171.9	836.1	903.7	914.3	930	957.3	981.6	992	1015.8	1024.8	1019.1	1027	1045	1040.6	1033.7	1034.7	1023.9	1012.1	1012.7	1029.7	1032.7	2.66667e-05	2.92706e-06	2.37397e-05	8.11042	9.09043
breb	CZ	2014	0.576	1003.7	804.7	1859.4	945.3	1007.8	1164.1	896.8	915.4	906.8	926.1	948.3	959.5	969.3	974.8	985.8	989	992.7	1008.7	1009.9	1008.3	1016.7	1012.1	1001.5	973.9	992.7	1034.3	3.98971e-05	2.04025e-06	3.78569e-05	18.555	12.6846
breb	CZ	2014	0.608	1042.7	796.9	1882.8	953.1	1031.3	1140.6	875	929.5	919.6	930.6	928.7	980.4	988.4	998.8	1008.1	1016.9	1031	1042.6	1061.7	1064.8	1040.9	1037.6	1033.9	1022.8	1016.4	508.5	3.58579e-05	4.60985e-06	3.12481e-05	6.77855	8.31137
breb	CZ	2014	0.616	1029.4	789.1	1890.6	960.9	1031.3	1179.7	884.2	932.7	928.6	950.1	968.7	992.2	992.3	1010.7	1021.5	1040.7	1037.4	1058.5	1053.3	1047.1	1040.6	1030	1006.8	1004.7	1031.3	520.6	3.46423e-05	2.96142e-06	3.16808e-05	10.6978	10.293
breb	CZ	2014	0.584	1035.3	765.6	1835.9	937.5	1023.4	1117.2	826.3	881.1	889.4	903.6	927.9	942.1	960.4	976.9	977.1	988.5	999.7	1026.4	1040.3	1010.5	1043.4	1041.1	1020.5	1001	1012.3	511.5	1.78798e-05	7.16608e-07	1.71632e-05	23.9506	13.7932
breb	CZ	2014	0.56	986.9	820.3	1851.6	960.9	1015.6	1125	867.9	996	915.5	945	971.5	977.4	990.2	988	1000.9	1018.8	1020.6	1027.4	1045.8	1040.3	1048.9	1045.4	1041.8	1022.3	1048.2	1032.5	8.0786e-05	4.29368e-06	7.64924e-05	17.8151	12.5079
breb	CZ	2014	0.592	986.4	851.6	1117.2	968.8	1023.4	1078.1	931.5	968.7	944.7	964.9	982.8	1001.3	1020.1	1019.9	1030.9	1042.8	1051.3	1061.4	1069.6	1074.1	1049	1024.4	1015.3	1006	1013.5	544.5	0.000125915	1.04852e-05	0.00011543	11.0088	10.4174
breb	CZ	2014	0.608	1007.5	859.4	1101.6	968.8	1023.4	1078.1	928.1	941.5	950.2	968.4	987.7	988.6	1003.3	1012.9	1014.1	1038.8	1057.4	1051.1	1057.8	1040.8	1033.1	1018	1004.3	987.1	984.3	1006.3	8.77667e-05	5.96502e-06	8.18017e-05	13.7136	11.3715
breb	CZ	2014	0.592	987	796.9	1859.4	945.3	1007.8	1078.1	885.2	911.6	912.9	927	948	955.4	984.5	985.5	997.8	1003.4	1021.2	1046	1054.5	1061.4	1056.1	1051.8	1046.4	1042	1038.4	1073.9	9.76306e-05	6.14056e-06	9.149e-05	14.8993	11.7317
breb	CZ	2014	0.568	985.9	765.6	1851.6	921.9	992.2	1070.3	880.9	902.4	894.1	910.8	928.3	962.2	966.6	977.2	988.8	988.5	1000.2	992.9	993.6	1002.8	1000.6	998.4	996.1	986.5	985.1	586.3	7.78439e-05	3.10983e-06	7.47341e-05	24.0315	13.8078
breb	CZ	2014	0.576	1020.1	851.6	1140.6	945.3	1007.8	1062.5	906.7	929.4	920.8	932.6	958.7	964.5	984	989.4	999.2	1010.6	1020.6	1028	1030.9	1038.8	1038.4	1031.7	1019.3	1017	1020	607.3	2.90797e-05	1.30715e-06	2.77726e-05	21.2467	13.2729
breb	CZ	2014	0.624	1017.2	828.1	1867.2	945.3	1015.6	1070.3	888.9	911.2	917.2	926.5	938.6	964.9	980.7	990.3	1005.8	1012.2	1019.6	1043.4	1045	1038.2	1031.2	1023.8	1015.6	1001.1	1010.4	1285.1	5.64341e-05	4.89103e-06	5.15431e-05	10.5383	10.2277
breb	CZ	2014	0.584	994.1	726.6	1171.9	929.7	1015.6	1085.9	753.6	926	904.9	897	978.4	981.9	997.2	1014.8	1041.4	1042.4	1042.5	1064.9	1081	1081.7	1081.2	1058.2	1041.8	1023.2	1026.5	1051.2	2.895e-05	1.6523e-06	2.72977e-05	16.521	12.1804
breb	CZ	2014	0.624	1022.6	750	1140.6	945.3	1015.6	1070.3	775.8	937.5	933.1	939.5	960.2	973.3	989.1	1005	1009.8	1020.6	1027.2	1042.7	1055.4	1054.9	1044.9	1037.5	1029.8	1013	1031.9	1030.7	2.29636e-05	5.48204e-06	1.74816e-05	3.18889	5.03639
breb	CZ	2014	0.624	1031.8	726.6	1156.3	929.7	1007.8	1070.3	786.3	927.1	912.9	933.5	940	930.7	1001.5	1024.3	952.9	1039.8	1053.3	1046.9	1046.1	1046.2	1046.8	1025.5	1003.6	1010.9	1038.1	996.4	1.93978e-05	9.82719e-07	1.84151e-05	18.7389	12.7275
breb	CZ	2014	0.632	993.1	757.8	1914.1	937.5	1015.6	1601.6	778.2	861.4	875.5	894.3	910.4	925.4	943.9	958.7	970	973.1	981.3	991.2	1003.9	1007.5	1012.8	1006.4	1011.4	1005.1	1006.6	1045.6	7.01202e-05	5.25531e-06	6.48648e-05	12.3427	10.9141
buda	CZ	2014	0.672	1018	906.3	1875	1007.8	1046.9	1429.7	876.8	927.6	954.5	976.1	985.3	1000.7	1010.6	1018.1	1021.5	1025.9	1027.3	1030.4	1024.5	1021.1	1007.2	1001.1	1012.3	511	1023.8	1027.2	1.03508e-05	1.47159e-07	1.02036e-05	69.3373	18.4097
buda	CZ	2014	0.632	1009.1	843.8	1914.1	976.6	1039.1	1546.9	800.1	922.7	930.5	938.4	954.7	977.2	990	992.1	1005.1	1008.1	1008	1006.6	1011.5	1016.1	1015.7	1014.4	997.2	988.2	508.4	1000.1	0.00016382	1.4813e-06	0.000162339	109.592	20.3978
buda	CZ	2014	0.656	1014.8	843.8	1914.1	976.6	1039.1	1546.9	754.2	925.3	932.8	939.4	955	975.1	986.4	992.6	1004.5	1007	1012.2	1016.2	1014.8	1005.2	1007.5	1009.6	1022	1009.8	528.7	1013.3	0.000148033	3.2091e-06	0.000144824	45.1291	16.5446	-20
buda	CZ	2014	0.664	1009.8	859.4	1929.7	984.4	1093.8	1554.7	1521.8	922.6	935.3	928.2	947.6	964.6	987.1	992.5	996.2	995.7	1006	1015.9	1012.4	1008.3	1008.2	1002	1011.1	999	505.4	1015.6	0.000136289	3.61019e-06	0.000132679	36.7511	15.6527	-10
buda	CZ	2014	0.672	1021.5	882.8	1929.7	992.2	1046.9	1562.5	768.8	921.8	957.4	962.6	979.3	995.6	1004.9	1014.2	1018.3	1024.3	1025.3	1022.8	1022.3	1025.3	1027.4	1022.1	1013.6	1002.1	1002.3	1505.8	0.000183793	5.90152e-06	0.000177892	30.1434	14.7919	-20
buda	CZ	2014	0.632	1019.7	859.4	1890.6	976.6	1046.9	1593.8	803.8	906.8	910.5	921.1	942.6	970.8	982.5	997.7	1004.1	1008.7	1017.3	1025.5	1027.5	1029.8	1021.5	1010.2	1005.9	1014.5	1015.4	506.4	0.00018993	2.10406e-06	0.000187826	89.2682	19.507
buda	CZ	2014	0.592	1027.8	875	1929.7	992.2	1046.9	1484.4	908.5	941.4	952.4	960.7	989.8	1002.2	1017.2	1026.1	1030.7	1036.4	1039.1	1040.1	1041.1	1037.4	1034	1031.6	1016	1002.1	1021.5	1024.4	0.000185134	1.01328e-07	0.000185032	1826.07	32.6152
buda	CZ	2014	0.64	1025.9	882.8	1640.6	992.2	1046.9	1507.8	911.2	954.9	958.9	956.2	972.4	987.8	998.7	1006.2	1013.3	1013	1025	1031	1035.3	1037.3	1034.5	1028.9	1014.4	1004.1	508.4	1506.2	0.000171275	2.07898e-06	0.000169196	81.3841	19.1054
buda	CZ	2014	0.712	1027.7	539.1	1539.1	968.8	1039.1	1468.8	1507.1	959	965.2	978.1	994.7	1010	1018	1018.3	1027.6	1038.3	1039.7	1037.7	1032.5	1024.2	1020.3	1011.9	992.5	1028.8	592.9	570.7	0.000185238	1.61121e-05	0.000169126	10.4968	10.2106
buda	CZ	2014	0.664	1026.8	890.6	1648.4	1000	1054.7	1492.2	1507.1	957.5	960	963.7	972	989.5	1001.5	1010.8	1018.1	1025.3	1033	1037.8	1031.2	1028.1	1021.6	1014.3	1009.9	1016.1	1014.3	1017.8	0.00018472	4.9371e-06	0.000179783	36.4147	15.6128
buda	CZ	2014	0.656	1026.3	851.6	1937.5	1000	1101.6	1539.1	1572.2	948.7	955.1	954.9	974.2	987.9	997.5	1018.8	1022.1	1027.6	1031.2	1034.1	1026.7	1024.2	1019.2	1014.1	1022	1010.8	1024.5	1011.8	9.1409e-05	2.16718e-06	8.92418e-05	41.1787	16.1467
buda	CZ	2014	0.64	1025.2	578.1	1882.8	867.2	1031.3	1500	1484.1	977.1	990.2	791.7	678.1	1016.8	1023	1029.6	1036	1032.5	1032.2	1033.7	1038.3	1038.6	1037.3	1030.1	1013	1006.4	1015.2	1584.6	0.000136699	1.20794e-06	0.000135491	112.167	20.4987
buda	CZ	2014	0.624	1040.2	914.1	1632.8	1023.4	1070.3	1484.4	950.7	1000.9	997.9	999.2	1013	1032.1	1044	1041.2	1051.9	1050.1	1055.6	1058.5	1056.8	1060.7	1053.6	1043.8	1037.7	1042.4	1030	1040.5	0.00019006	1.6085e-06	0.000188451	117.16	20.6878
buda	CZ	2014	0.64	1031.1	906.3	1609.4	1015.6	1054.7	1492.2	935.9	996.2	999.5	992	1005.3	1018.1	1019.3	1030.6	1037.6	1041.6	1044.6	1047.2	1045.7	1039.1	1038.3	1034.7	1031.3	1016.1	1013.6	1007.7	0.000193657	1.96493e-06	0.000191692	97.5567	19.8926
buda	CZ	2014	0.648	1034.8	914.1	1578.1	1015.6	1062.5	1507.8	954.2	996	994	1002.1	1016.5	1026.7	1032.9	1037.1	1046.5	1047.3	0	1048.2	1045.1	1042.7	1039.3	1036.2	1030	1022.5	508	1495	0.000195791	3.74368e-06	0.000192047	51.299	17.1011
buda	CZ	2014	0.64	1031.5	851.6	1929.7	992.2	1062.5	1562.5	738.9	919.3	952.7	952.7	956.9	980.4	991.6	1005.5	1020.5	1025.4	1026.8	1025.9	1030.9	1034.6	1034.4	1018.6	1009.5	1019.3	519.1	1443.1	6.8646e-05	5.0731e-07	6.81387e-05	134.314	21.2812
buda	CZ	2014	0.64	1026.4	906.3	1914.1	1000	1054.7	1539.1	789	947.7	949	948.4	959.2	977.2	988	1000.4	1010.1	1022.6	1026.7	1026.3	1033.3	1029.2	1025.4	1025.3	1029	1020.4	509	1324.3	0.000109433	1.4391e-06	0.000107994	75.0428	18.7531
buda	CZ	2014	0.608	1027.8	890.6	1609.4	1007.8	1046.9	1453.1	949.5	983.2	984	981.1	993.9	1007.3	1020	1035.3	1043.9	1049.3	1050.7	1047.8	1048.3	1049.4	1042.9	1030.7	1018.7	1004	516	1012.3	9.97767e-05	8.62023e-07	9.89147e-05	114.747	20.5974
buda	CZ	2014	0.624	1038.1	921.9	1609.4	1015.6	1070.3	1468.8	1326.2	975.1	990.3	983.9	824.4	1004	1012.8	1024.4	1036.3	1042.4	1044.8	1047.7	1041.7	1036.1	1034.7	1028.3	1021	1009.1	514.8	519.2	3.91737e-05	1.79004e-06	3.73837e-05	20.8843	13.1982
buda	CZ	2014	0.632	1016.8	906.3	1703.1	1007.8	1109.4	1523.4	605.8	502.3	998.7	985.9	996.2	1005.2	1016.5	1021.9	1019.1	1011.8	1017.5	1019.2	1021.8	1017.3	1016.3	1005.4	994.9	998.9	517.5	1012.4	8.34053e-05	2.52536e-06	8.08799e-05	32.027	15.0552
buda	CZ	2014	0.64	1027.9	835.9	1687.5	984.4	1054.7	1539.1	1489.7	946.5	967.6	965.3	973.1	995.2	1010.6	1019.4	1027.2	1027.7	1033.6	1035.2	1033.9	1034.2	1030.2	1022	1008.2	996.7	996.3	1477.1	3.54237e-05	7.76164e-07	3.46475e-05	44.6394	16.4972
buda	CZ	2014	0.664	1029.4	875	1796.9	1000	1062.5	1554.7	1575.6	959.8	974.1	972.7	986.7	1012.6	1017.9	1023	1026.3	1026.3	1027.2	1037.9	1039.5	1035.5	1023.9	1022.2	1020.4	1007.5	523.4	1442.4	9.26463e-05	4.46898e-06	8.81774e-05	19.731	12.9515
buda	CZ	2014	0.632	1024.5	898.4	1625	1000	1039.1	1484.4	927.8	978.2	981.9	987.7	997.2	1003.6	1011.7	1019.8	1025.3	1032	1036.6	1031.1	1025.5	1024.1	1026.6	1017.5	999.2	996.1	514.1	1005.7	0.000262106	2.19366e-06	0.000259912	118.483	20.7366
buda	CZ	2014	0.56	1021.2	898.4	1585.9	992.2	1031.3	1476.6	934.1	962.8	978.5	977.6	990.3	1002.5	1010.2	1019.7	1022.4	1024.9	1024.5	1026	1021.7	1024.6	1019.8	1016.9	1014.5	993.7	985.3	979.5	0.000201003	4.52042e-07	0.000200551	443.656	26.4705
buda	CZ	2014	0.672	1020.9	890.6	1765.6	992.2	1046.9	1507.8	925.9	959.9	958.8	960.7	980.4	999.4	1006	1014.2	1023.1	1023.5	1028.1	1033.3	1031.2	1027.1	1021.8	1011.7	1000.2	991.9	1008.8	517	0.000188339	8.73698e-06	0.000179602	20.5566	13.1295
buda	CZ	2014	0.592	1025.8	890.6	1906.3	984.4	1039.1	1476.6	912.5	939.3	937.1	946.6	968.7	992.5	1004	1015.1	1024.1	1023.8	1025.3	1025.1	1033.2	1037.9	1036.7	1027	1000.7	984.9	997.8	1465.3	0.000178196	8.62222e-07	0.000177334	205.671	23.1317
buda	CZ	2014	0.672	1013.3	890.6	1929.7	984.4	1039.1	1515.6	918.6	953.8	949.4	947	960.4	982.9	991.8	992.5	1002.1	1011.5	1012.9	1017.2	1015	1015.4	1016.8	1010.3	996.2	981.1	998.3	990.7	0.000197956	9.09877e-06	0.000188858	20.7564	13.1715
buda	CZ	2014	0.552	1032.7	921.9	1703.1	1015.6	1070.3	1531.3	963.6	991.5	980.6	972.8	990.2	1010.3	1013	1016.5	1021.6	1032.9	1036.1	1038.3	1039.5	1035.3	1023.2	1011.3	1014.1	1019.2	523.5	1024.1	6.45609e-05	3.5226e-07	6.42086e-05	182.276	22.6073
buda	CZ	2014	0.624	1039	921.9	1609.4	1015.6	1062.5	1531.3	956	990.3	984.6	985.2	1007.1	1022.2	1030.7	1038	1038.5	1037.3	1035.3	1041.4	1047.1	1043	1037.8	1030.3	1030.7	1008.2	1011.2	1572.6	0.000192071	1.53507e-06	0.000190536	124.122	20.9385
cerb	CZ	2014	0.432	1005.8	828.1	1257.8	960.9	1015.6	1156.3	837.1	867.8	846.6	939.7	953.4	977.3	992.3	995.2	1005.8	1013.7	1017	1019.5	1022.8	1022	1019.8	1017.6	1008	985.2	967.4	1078.2	0.000119327	2.0443e-06	0.000117282	57.3704	17.5869
cerb	CZ	2014	0.432	1046.9	867.2	1093.8	976.6	1023.4	1062.5	902.7	891.2	965.6	988.8	1007.5	1026.5	1040.7	1040.2	1049.1	1053.1	1054.6	1057.4	1056.2	1057.1	1050.8	1042.5	1031.3	1017.2	994.4	854.7	0.000209448	6.09662e-06	0.000203351	33.3547	15.2316
cerb	CZ	2014	0.408	1065	906.3	1117.2	992.2	1046.9	1085.9	933.4	952	990.4	1022.6	1046	1062.8	1072	1074.9	1072.6	1069.7	1067.6	1067.3	1064.7	1062.8	1059.4	1055.3	1052	1033.7	998.2	959.9	0.000268731	5.1725e-06	0.000263558	50.9538	17.0718
cerb	CZ	2014	0.416	1049.9	898.4	1101.6	984.4	1039.1	1070.3	932.2	951.6	984	1018	1034.9	1058.2	1062.8	1063.5	1063	1056.3	1060.1	1060	1057.9	1055.4	1054.9	1052	1044.7	1015.1	979.5	889.2	0.000260761	6.41599e-06	0.000254345	39.6424	15.9816	-20
cerb	CZ	2014	0.392	1015.8	867.2	1078.1	976.6	1015.6	1046.9	911.9	940.8	983.1	998.6	1008.4	1013	1023.6	1036.5	1037.2	1034.9	1036	1035.8	1036.2	1038.4	1034.6	1033.1	1025.4	1010.2	976.6	889.8	0.000258044	1.24535e-06	0.000256799	206.206	23.143	-10
cerb	CZ	2014	0.408	1047	890.6	1109.4	992.2	1039.1	1078.1	918.7	930.4	982.9	1016.4	1032.5	1054.4	1063.2	1066.1	1067.8	1060.9	1063.4	1067.2	1062.9	1057.2	1052.4	1049.5	1043	1019.8	996.1	963.3	0.000307831	3.94157e-06	0.000303889	77.0985	18.8705	-20
cerb	CZ	2014	0.4	1054.1	890.6	1101.6	984.4	1031.3	1070.3	940.2	960.1	991.9	1013.7	1037.8	1060.9	1063.3	0	1064	1064.9	1065.5	1062.8	1054.7	1050.1	1046.2	1035.7	1028.2	1016.1	984.6	886	0.000261745	2.56778e-06	0.000259178	100.934	20.0404
cerb	CZ	2014	0.392	1063.9	898.4	1109.4	992.2	1039.1	1078.1	923.8	933.3	982.2	1003.8	1029.1	1042.5	1057.1	1059.3	1066.7	1073.7	1073.5	1072.4	1069.5	1060.7	1057.2	1053.8	1043.7	1024	995.3	960.6	0.000341647	2.19728e-06	0.00033945	154.486	21.8889
cerb	CZ	2014	0.392	1080.7	914.1	1140.6	1007.8	1062.5	1101.6	948.8	970.7	1013.1	980.9	1039.4	1074.9	1082.1	1086.9	1088	1080.2	1077.6	1074.7	1070.5	1062	1054.3	1048.3	1042	1027.8	996.3	953.3	0.00040817	5.0408e-06	0.000403129	79.9731	19.0294
cerb	CZ	2014	0.4	1049	890.6	1117.2	992.2	1039.1	1085.9	916.8	930	976.7	997.8	1025.7	1054.6	1062.9	1071.3	1070.6	1067.2	1068.4	1070.2	1068.5	1064.2	1060.9	1054.6	1045.7	1031.8	1000.8	961.8	0.000338953	2.47294e-06	0.00033648	136.064	21.3374
cerb	CZ	2014	0.4	1036.1	859.4	1085.9	968.8	1015.6	1054.7	902	849.3	953	960.8	979.9	998.4	1015.1	1026	1031.1	1039.4	1045.2	1043.5	1040.4	1041.1	1038.1	1032.2	1015	996.7	963.9	884.3	0.000232155	1.95713e-06	0.000230198	117.62	20.7048
cerb	CZ	2014	0.408	1082.9	929.7	1132.8	1015.6	1070.3	1101.6	952.2	977	1027.2	1064.6	1076.7	1083.9	1087.5	1090.4	1093.2	1087.8	1080.7	1074.2	1073.8	1070.6	1059.7	1054.2	1048	1024.7	991.9	886.6	0.00054797	8.91038e-06	0.00053906	60.4979	17.8174
cerb	CZ	2014	0.416	1071	914.1	1125	1007.8	1054.7	1093.8	940.4	960.6	1006.7	1042.2	1063.8	1078.1	1077.7	1080.5	1075.6	1068.5	1072.1	1067.4	1066	1063	1057.7	1047.6	1039.7	1022.6	995.1	885.5	0.000366966	1.36994e-05	0.000353266	25.7869	14.114
cerb	CZ	2014	0.408	1056.8	906.3	1117.2	1000	1046.9	1085.9	933.5	957.9	1000.6	1035.7	1055.2	1064.4	1072.3	1075.1	1073	1067.6	1066.8	1062.5	1059	1057	1053.9	1049.1	1042	1025.9	1001.7	887.4	0.000471548	4.57668e-06	0.000466972	102.033	20.0874
cerb	CZ	2014	0.416	1023.9	882.8	1085.9	984.4	1023.4	1062.5	913.1	929.7	971.7	994.6	1006	1031.5	1047	1049.5	1048.6	1048.6	1047.6	1044	1041.5	1039.1	1035.4	1031.4	1024	1004.8	981.8	885.4	0.000327109	4.55109e-06	0.000322558	70.8749	18.5049
cerb	CZ	2014	0.408	1053.3	890.6	1101.6	984.4	1031.3	1070.3	911.9	928.6	973.6	1004	1023.8	1050.6	1052.8	1052.4	1049.7	1054.2	1057.1	1058.8	1055.9	1051.2	1045.7	1039	1030.2	1018.9	990.9	890.9	0.000417205	4.49115e-06	0.000412714	91.8949	19.6329
cerb	CZ	2014	0.408	1052.4	898.4	1109.4	992.2	1039.1	1078.1	913	929.1	975.9	1007.5	1020.1	1038	1055.2	1062.1	1065.4	1057.1	1056.6	1057.9	1056.8	1056.3	1052.7	1046.8	1039.8	1021.4	990.9	954.7	0.000416701	3.14351e-06	0.000413558	131.559	21.1912
cerb	CZ	2014	0.4	1071.6	914.1	1125	1000	1054.7	1093.8	934.1	962.1	1003.8	1024.1	1060	1069.8	1074.1	1076.7	1076.1	1078.9	1077.5	1073.9	1068.9	1060.4	1057.5	1055.6	1047.8	1031.9	996.3	887.3	0.000417545	3.59063e-06	0.000413955	115.287	20.6178
cerb	CZ	2014	0.392	1078.6	914.1	1125	1007.8	1054.7	1093.8	886.8	963.4	1005.1	1025.7	1059.9	1061.9	1068.8	1081.8	1083.6	1080.8	1077.3	1072.7	1069.1	1065.7	1059.6	1053.1	1043.6	1026.3	998	887.3	0.000461038	3.59224e-06	0.000457446	127.343	21.0497
cerb	CZ	2014	0.384	1077.6	921.9	1125	1007.8	1054.7	1093.8	945.6	971.9	1017.4	1051.5	1066.9	1077.9	1078.3	1074.7	1080	1082	1078.2	1074.5	1069.3	1062.8	1057.8	1054	1039.3	1021.6	995.4	886.5	0.000448794	2.60959e-06	0.000446184	170.978	22.3294
cerb	CZ	2014	0.408	1055.4	890.6	1117.2	992.2	1046.9	1085.9	904.5	925.4	971.1	1001.8	1021	998.8	1060.8	1067.5	1072.3	1066.8	1065	1062.4	1055.9	1053.5	1050.8	1042.7	1036.1	1015.3	978.4	885.9	0.000352432	4.76871e-06	0.000347663	72.9051	18.6276
cerb	CZ	2014	0.384	1086.6	929.7	1140.6	1015.6	1070.3	1101.6	949.9	978	1026.1	1052.5	1071.5	1085.7	1087	1086.3	1083.5	1091	1090.2	1088.3	1082.8	1078.4	1068.3	1062.7	1053.3	1041.4	999.8	956.8	0.000602795	2.99908e-06	0.000599796	199.993	23.0101
cerb	CZ	2014	0.392	1071.2	914.1	1125	1000	1054.7	1093.8	936.2	962	1001.2	1021.2	1002.9	1059.8	1068.9	1074.2	1074	1077.5	1075.1	1072.2	1068.7	1063.1	1054.3	1048.7	1035.9	1017.9	984.1	953.3	0.000353956	3.3644e-06	0.000350592	104.206	20.1789
cerb	CZ	2014	0.384	1092.2	921.9	1164.1	1031.3	1078.1	1117.2	941	970.2	1023.2	1053.2	1070	1073.7	1082.7	1090.4	1109.1	1103.2	1093.2	1086.3	1073	1068	1064.4	1060.5	1049.9	1033.9	1006	894	0.000344977	1.72677e-06	0.00034325	198.782	22.9838
cerb	CZ	2014	0.416	1042.7	890.6	1101.6	984.4	1031.3	1070.3	918.3	929.7	981	1010.7	1023.2	1037.8	1051.4	1056.5	1055	1050.8	1051.2	1056.8	1055.7	1050.4	1043	1044.1	1036.2	1007.5	971.8	882.5	0.000330208	5.87588e-06	0.000324333	55.1972	17.4192
cerb	CZ	2014	0.416	1017	890.6	1085.9	976.6	1015.6	1054.7	914	928.3	964.4	990.7	1007.1	1015.5	1033	1041.6	1041.3	1043.7	1042.8	1044.2	1038.1	1034.1	1032.8	1027.5	1020.5	1001	967	918.3	0.000281024	4.12663e-06	0.000276898	67.1002	18.2672
cerb	CZ	2014	0.408	1067.9	898.4	1117.2	992.2	1046.9	1085.9	919.6	930.3	983.6	1017.8	1035.7	1056.2	1070.3	1073.5	1072	1073.7	1069.6	1063.2	1064	1060.7	1053.7	1050.4	1046.3	1025.5	997.4	961.4	0.000365933	5.58858e-06	0.000360345	64.4787	18.0942
cerb	CZ	2014	0.408	1020.6	875	1070.3	976.6	1015.6	1054.7	893.6	843.4	936.7	951.4	962.6	981	1004.4	1010.1	1011.8	1019	1027	1032.9	1033.3	1035.3	1033	1027.1	1020.9	1000.2	974	861.2	0.000275014	2.97951e-06	0.000272034	91.3019	19.6048
cerb	CZ	2014	0.416	1080.2	921.9	1132.8	1007.8	1062.5	1093.8	949.2	970.7	1013.1	1048.4	1065.8	1077.6	1079.3	1083.6	1086.4	1084.9	1076	1071.1	1068.2	1064	1056.8	1047.1	1042.4	1018.2	989.6	885.4	0.000490864	1.75279e-05	0.000473336	27.0047	14.3144
cerb	CZ	2014	0.416	1069.7	914.1	1117.2	1000	1046.9	1085.9	928.3	951.6	990.2	978.8	1050.9	1070.6	1078.1	1075.2	1073.6	1074	1072.2	1063.9	1061.3	1055.2	1045.8	1036	1029.9	1008.7	981.9	957.7	0.000442024	1.17357e-05	0.000430288	36.6649	15.6425
cerb	CZ	2014	0.408	1063.7	914.1	1109.4	1000	1046.9	1078.1	933.4	950.7	986.2	979.8	1038	1062.9	1070.3	1073.2	1070.8	1068.8	1068.9	1064.7	1062.1	1060.2	1054.7	1050.5	1038.1	1024.4	991.4	958.8	0.000413434	6.31343e-06	0.000407121	64.4849	18.0946
cerb	CZ	2014	0.416	1054.6	914.1	1109.4	992.2	1039.1	1070.3	926.3	932.1	983.6	1011	1022.4	1040.6	1062.2	1062.2	1059.5	1058.7	1059.5	1060.2	1060.9	1057.9	1049.8	1040	1036.6	1021.1	989.5	957.9	0.000415059	4.96403e-06	0.000410095	82.6132	19.1705
cerb	CZ	2014	0.4	1069.3	914.1	1117.2	1000	1046.9	1085.9	935.1	958.7	1004.2	980.4	1055	1074.2	1076.5	1078.6	1077	1071.5	1065.7	1064.5	1063.1	1059.7	1055.1	1049.5	1038.6	1028.2	997.8	960.3	0.000392849	2.71308e-06	0.000390136	143.798	21.5775
cerb	CZ	2014	0.4	1049	898.4	1101.6	992.2	1039.1	1070.3	919.1	930.9	984.8	1007.9	1030	1043.2	1055.6	1059.8	1058.7	1059.5	1056.3	1056.1	1055.2	1051.4	1047.9	1042.9	1033.2	1022.7	991.2	952.3	0.000420891	3.68907e-06	0.000417202	113.091	20.5343
cerb	CZ	2014	0.392	1070.2	914.1	1125	1000	1054.7	1085.9	937	959.5	1002.9	1023.8	1053.5	1069.9	1073.7	1077.4	1076.1	1066.6	1066.6	1062.1	1058.3	1055	1050	1048.8	1040.1	1026.6	992.6	953.9	0.000443763	3.56446e-06	0.000440199	123.496	20.9165
cerb	CZ	2014	0.4	1047.9	890.6	1093.8	984.4	1031.3	1070.3	925.8	933.7	980.7	995	1012	1036.8	1043.2	1046.9	1052.9	1055.8	1057.5	1057.8	1054.2	1051.3	1049.1	1045.8	1032.7	1013	977.3	860.6	0.00043556	3.27478e-06	0.000432285	132.004	21.2059
cerb	CZ	2014	0.4	1136.9	929.7	1195.3	1046.9	1109.4	1148.4	952	984.4	1061.8	1087.5	1108.5	1110.2	1117	1135.8	1147.6	1144.7	1146.8	1147.7	1147.7	1141.5	1136	1127.2	1113.8	1100.9	1070.3	971.6	0.000535168	3.21808e-06	0.00053195	165.301	22.1827
cerb	CZ	2014	0.4	1068.6	914.1	1117.2	1000	1046.9	1085.9	936	957.5	999.5	1017.2	1040.1	1062.2	1070.2	1076.4	1073.5	1066.8	1066.3	1065.9	1062.6	1057.9	1055.1	1053.5	1043.8	1028.2	992.1	954.5	0.00041341	4.00146e-06	0.000409408	102.315	20.0994
cerb	CZ	2014	0.392	1071.7	914.1	1125	1000	1054.7	1085.9	935.5	962.8	1009.3	1046.3	1057.4	1063.6	1073.7	1075.7	1071.9	1077.5	1075.9	1068.1	1063.4	1054.4	1047.1	1041.2	1027.2	1017.5	987.1	948.8	0.00036147	2.31026e-06	0.00035916	155.463	21.9163
cerb	CZ	2014	0.376	1047.6	906.3	1101.6	992.2	1039.1	1078.1	933.8	936.4	974.8	1011.8	1029.3	1044.6	1054.6	1061.2	1062.3	1062.4	1064.3	1064.5	1059.9	1053.3	1051.3	1045	1037	1017.5	997.9	886.6	0.000350206	8.44515e-07	0.000349361	413.683	26.1667
duba	CZ	2013	0.472	953.7	820.3	1023.4	906.3	953.1	1000	832.4	845.7	875.5	901.1	915	926	939.3	945.8	948.9	956.3	960.4	963.3	962.7	960.8	959.8	958.5	957.7	957.9	959.7	972.9	2.60024e-05	3.69522e-07	2.56329e-05	69.3677	18.4116
duba	CZ	2013	0.544	968.1	804.7	1906.3	921.9	984.4	1289.1	1633.7	830.7	871	865.7	922.3	935.4	937.3	958.9	959.7	970.7	972.5	971.4	970	969.7	975	968.2	964.2	960.9	964.2	960.9	4.31122e-06	2.30454e-07	4.08077e-06	17.7075	12.4816
duba	CZ	2013	0.544	963.3	820.3	1828.1	921.9	968.8	1187.5	787.7	834.9	848.4	857.9	908	929.5	942.1	948.1	955	964.3	968.5	975.9	975.5	974.3	976.1	980.2	972.5	976.1	967.6	977.7	4.41016e-05	3.18194e-06	4.09197e-05	12.86	11.0924
duba	CZ	2013	0.52	964	835.9	1906.3	929.7	976.6	1648.4	783.2	845.1	818.6	863.1	908.3	924.8	933.7	938.9	948.9	952.2	957.6	966.7	976.5	978.3	977.3	976.3	975.6	971.2	967.4	960.6	0.000138562	2.14335e-05	0.000117129	5.46473	7.37569	-20
duba	CZ	2013	0.56	986.3	851.6	1890.6	937.5	992.2	1210.9	854	870.4	882.5	903.3	919.8	941.3	960.4	971	977.1	978.2	980.2	989.2	990.6	990.5	990.9	991.4	990.8	986.7	988.2	993.7	0.000272064	6.69993e-05	0.000205065	3.0607	4.8582	-10
duba	CZ	2013	0.52	958	835.9	1898.4	929.7	976.6	1609.4	664.9	826.1	844.2	883.4	910.5	928.4	938	942.8	956	965.1	968.8	972.6	970.6	972.2	972.1	972.3	971.7	967.2	962.5	971.2	0.000129609	4.07031e-06	0.000125539	30.8426	14.8915	-10
duba	CZ	2013	0.488	976.5	843.8	1898.4	937.5	984.4	1625	822.4	842.2	867.3	882.7	910.4	928.3	938.3	941	951	962.8	968.6	973.8	976	978.2	984.3	981.5	977.8	970.8	963	961.3	0.000110622	8.18572e-06	0.000102436	12.514	10.974
duba	CZ	2013	0.528	977.9	835.9	1726.6	929.7	976.6	1085.9	783.5	840.6	864.7	886.9	907.1	928.3	940.3	948.2	960.3	971.5	975.2	978.5	983.5	984.3	984.3	984	982.3	978.7	974.7	968.2	0.000107235	1.38623e-05	9.3373e-05	6.73576	8.28386
duba	CZ	2013	0.528	957	820.3	1875	921.9	968.8	1265.6	758.9	836.1	854.5	902.7	910.9	934.1	945.6	947.6	946.8	952.9	954	964.9	969.3	972.3	974.6	972.6	968	964.5	960.8	961.7	6.76722e-05	1.98805e-06	6.56842e-05	33.0395	15.1903
duba	CZ	2013	0.544	964.9	820.3	1703.1	929.7	976.6	1109.4	759.6	826	846	887.3	919.8	933.9	947.3	958.5	963	967.5	971.6	971.2	981.2	979.2	977.5	973.5	968.5	963.3	962.3	988.9	3.48847e-05	4.11596e-06	3.07688e-05	7.47549	8.7364
duba	CZ	2013	0.504	954	828.1	1890.6	921.9	960.9	1156.3	762.3	851	876.2	899.6	915.5	925	933.1	942.3	951	956.8	959.4	958	961.1	960.8	957.8	959.4	960.9	959.6	956.1	972.6	0.000209203	4.16948e-06	0.000205034	49.1749	16.9174
duba	CZ	2013	0.488	938.3	828.1	1898.4	921.9	960.9	1609.4	791.9	836.9	848.8	876.8	899.6	910.5	919.6	922	924.7	928.5	935	937.9	942.8	950.7	946.7	947.8	950.1	949.3	949.9	969.4	0.000279789	5.27218e-06	0.000274517	52.069	17.1658
duba	CZ	2013	0.48	946	835.9	1882.8	921.9	960.9	1500	820.8	849.8	871.8	882.5	890.9	909.8	920.1	929.9	933.9	934.9	939.6	941.8	943.7	945.9	948.9	950.6	946.9	947.9	950.8	966.7	0.000162889	1.4956e-05	0.000147933	9.89122	9.9525
duba	CZ	2013	0.512	957.5	835.9	1898.4	929.7	976.6	1609.4	819.6	835.7	851.7	894.5	907.5	916.5	927.3	938.1	941.5	957.7	961.6	962.1	965.9	967.4	968.9	967.7	962.2	964.2	967.4	991.8	0.000202271	6.8599e-06	0.000195411	28.486	14.5463
duba	CZ	2013	0.528	957.1	843.8	1890.6	929.7	968.8	1484.4	817.2	836.5	819.7	903.7	918.6	928.6	935.5	939.8	947.8	947.7	949.5	953.9	959.4	963.7	962	966.4	962.6	960.8	956.1	967.4	0.000239956	2.06932e-05	0.000219262	10.5959	10.2514
duba	CZ	2013	0.52	954.8	828.1	1898.4	929.7	968.8	1429.7	798.8	836	848.1	871.4	906.5	925.7	934.3	942.8	959.8	965.8	964.7	965.7	970.8	974.5	973.3	967.8	964.5	961.5	956.5	969.3	0.000182961	3.16469e-05	0.000151314	4.78134	6.79549
duba	CZ	2013	0.568	948.2	828.1	1906.3	929.7	976.6	1656.3	784	1639.2	843.4	839.9	865.7	917.6	923.6	932.9	935.5	944.1	952.1	952	951.2	955.2	953.5	952.9	952.4	950.6	953	969.7	0.000259629	1.31931e-05	0.000246436	18.6792	12.7136
duba	CZ	2013	0.688	930.7	617.2	1851.6	867.2	945.3	1312.5	745	606.6	762.7	794.5	860.3	888.7	917.3	934.1	944.3	948.6	951.2	954.7	956.1	955.1	961.2	960	956.4	949.1	963.2	955.2	4.93126e-06	3.67364e-07	4.56389e-06	12.4234	10.9424
duba	CZ	2013	0.472	947.9	828.1	1882.8	914.1	953.1	1023.4	831	844.2	868.9	898.7	909.2	921.1	926.7	934.2	943.4	948.8	947.7	947.6	951.7	956.8	961.2	958.1	955.1	957.2	955.7	962.2	0.0001492	1.74348e-06	0.000147456	84.5757	19.2725
duba	CZ	2013	0.504	958.7	835.9	1890.6	929.7	968.8	1156.3	756.6	837.2	819.8	903.3	917.3	928	938.3	948.7	955.7	959.6	966.1	969.4	968.7	971.7	975.3	976.6	973	967	963.2	971.2	0.000185644	2.90981e-06	0.000182734	62.7993	17.9795
duba	CZ	2013	0.48	963.5	835.9	1875	929.7	968.8	1117.2	829	813.8	875.1	901	913.3	927.7	943.3	951.6	954	964.6	966.2	970.3	974.4	971.2	971.7	975.5	977.4	970	965.3	971.4	0.000146943	1.37783e-06	0.000145566	105.648	20.2386
duba	CZ	2013	0.512	960.9	835.9	1890.6	929.7	968.8	1531.3	789.9	840.6	853.7	894.6	906.7	920.3	929	942.9	952.9	956.8	965.5	967.6	967.4	965.2	970.4	971.1	971	962.1	957.5	964.9	0.000176313	6.32211e-06	0.000169991	26.8883	14.2956
duba	CZ	2013	0.488	954.2	828.1	1890.6	921.9	960.9	1304.7	825.9	838.6	876.2	903.3	910.6	926.5	936.8	944.8	949.4	950.7	951.8	961.4	964.9	960.9	956.8	959.3	958.4	957.1	953.6	960.6	0.000144082	2.72388e-06	0.000141358	51.8959	17.1513
duba	CZ	2013	0.48	960.1	843.8	1898.4	929.7	976.6	1593.8	744	842.7	859.4	870.9	906.3	921.1	927.3	937.3	947.3	954.8	959.2	964.4	962.8	967.9	968.3	967	967.6	967.4	962.2	972.8	0.00018158	3.60988e-06	0.00017797	49.3008	16.9285
duba	CZ	2013	0.536	959.3	828.1	1898.4	929.7	976.6	1578.1	785.9	821.8	844.5	879.9	908.9	927.1	937.3	947.8	954.3	961.7	963.8	966.3	968.9	971.7	974.8	977.5	969.6	965.1	962.3	978.5	0.000178275	7.10178e-06	0.000171173	24.1028	13.8207
duba	CZ	2013	0.464	933	828.1	1906.3	921.9	960.9	1656.3	755.3	833.4	850.4	903.7	911.2	919.4	929.1	939.5	946.6	950.6	949.6	949.6	950.4	952.2	952.4	952.6	954.3	955.3	951.6	961.5	0.000139447	2.07695e-06	0.00013737	66.1401	18.2046
duba	CZ	2013	0.496	958	828.1	1890.6	921.9	968.8	1359.4	777.3	834.5	848.5	876.9	907	921	931.3	939.3	953.2	960.7	963.9	964.4	969.5	972.8	974	973.7	972.5	969.3	964.4	962.1	0.000206438	5.29467e-06	0.000201144	37.9898	15.7967
kneb	CZ	2014	0.48	923.4	820.3	1890.6	929.7	1015.6	1289.1	813.2	878	890.4	893.5	905.4	912.4	915.8	923.9	923.2	931.4	931.3	932.5	931.4	932.2	931.2	929.6	924.4	926.8	982.6	1016.2	2.86256e-05	5.01285e-07	2.81243e-05	56.1044	17.49
kneb	CZ	2014	0.496	922.1	843.8	1867.2	929.7	1039.1	1218.8	866.4	871.7	879.2	898.1	905.3	914.4	873	917.2	862.3	919.5	924.6	907.3	930.5	927.1	857.5	853.7	930.2	931.7	1046.6	932	1.65591e-05	9.98275e-07	1.55608e-05	15.5877	11.9278
kneb	CZ	2014	0.496	1070.5	820.3	1875	929.7	1062.5	1265.6	860.2	863.6	872.2	875.6	902.6	908.9	859.5	844.5	855.7	921	879.4	929.3	901.2	924.3	924.8	921.4	925.7	982.5	1067.7	536.4	1.29001e-05	6.36286e-07	1.22638e-05	19.274	12.8497
kneb	CZ	2014	0.48	876.3	820.3	1875	914.1	1000	1382.8	826.1	862.6	872.7	884.6	890.8	896	899.8	905.9	913.6	870.8	918.9	886.6	918.1	920	918.3	918.1	917.1	920.9	919.5	972.6	1.07163e-05	6.1457e-07	1.01018e-05	16.4371	12.1583	-10
kneb	CZ	2014	0.648	871.2	500	1851.6	882.8	984.4	1343.8	508.6	1007.4	788.3	824	825.7	858.5	875.9	882	886.8	886.1	894.8	853.3	814.8	890.3	889.7	892.3	896.5	939.6	689.7	813.1	1.11767e-05	1.09709e-06	1.00796e-05	9.18753	9.63199	-10
kneb	CZ	2014	0.736	871.8	484.4	1859.4	875	1015.6	1359.4	985	512.8	1326.8	809.8	833.6	858	871.6	812.2	896.9	889.7	901.4	898.5	902.9	903.6	904.9	921.2	1013.7	811.2	915.6	1026	9.68108e-06	1.47891e-06	8.20217e-06	5.54611	7.43989	-10
kneb	CZ	2014	0.592	878.4	484.4	1867.2	898.4	1062.5	1414.1	663.7	751.9	767.5	761.2	825.6	839.8	861.5	867.3	874.5	885.1	888.1	898.6	886.7	904.1	901.8	901.5	926.8	1054.6	905.3	1395.6	1.56804e-05	6.52083e-07	1.50283e-05	23.0466	13.6261
kneb	CZ	2014	0.64	900.2	484.4	1851.6	890.6	992.2	1343.8	797.3	817.2	816.5	855.2	870.7	880.8	889.7	894	895.2	897.4	896.2	897.9	898.8	901	906.7	922	985	0	907.9	502.3	2.6878e-05	1.71925e-06	2.51588e-05	14.6336	11.6535
kneb	CZ	2014	0.568	903.7	765.6	1851.6	906.3	1023.4	1437.5	787	812.1	837.9	859.3	871.6	881.1	886.7	889.7	896.9	902.7	905.2	1802.6	900.5	908.1	907.1	907.9	910.5	907.1	1024.2	538.7	3.18344e-05	7.23472e-07	3.1111e-05	43.0023	16.3349
kneb	CZ	2014	0.608	897.9	507.8	1835.9	835.9	929.7	1335.9	803	824.1	848.7	857.8	871.5	875	883.9	889.2	892.9	895.8	895	896.7	900.8	900	902.8	572.7	923.6	980.1	898.8	901.4	2.49891e-05	3.1271e-06	2.1862e-05	6.99115	8.44549
kneb	CZ	2014	0.488	900	820.3	1843.8	898.4	953.1	1296.9	843.7	854.7	872	883	890.2	898.3	900.7	905.4	908.5	909.9	909.9	905.3	907.2	911.2	908.3	910.4	917.7	923	912.8	969	2.08534e-05	5.74211e-05	-3.65676e-05	-0.636833
kneb	CZ	2014	0.528	914.5	796.9	1867.2	914.1	992.2	1343.8	844.6	852	860.9	880.5	886.8	893.5	899.4	899.9	907.7	907.7	915.4	918.4	918.6	920.1	919.7	919.7	920.9	924.6	977.7	971.4	2.85382e-05	1.06821e-06	2.747e-05	25.7158	14.102
kneb	CZ	2014	0.656	803.5	523.4	1703.1	789.1	968.8	1257.8	521.4	544.3	565.5	602.7	623.6	633.8	659.3	698.8	710.5	731.5	749.4	755.5	768.6	772	777.1	794.6	798.9	819.8	544.1	930.2	1.66637e-05	3.06699e-06	1.35967e-05	4.43325	6.46722
kneb	CZ	2014	0.528	877.2	726.6	1796.9	851.6	937.5	1179.7	742.1	752.5	775.4	790.6	798.8	807	810	817.4	823.9	835.5	842.8	851	856.5	872.1	875	884.4	886	590.3	1133.7	885.2	4.60764e-05	2.21019e-06	4.38662e-05	19.8472	12.977
kneb	CZ	2014	0.6	898	750	1843.8	875	968.8	1156.3	774.6	779.5	802.3	830.3	844.6	853	860.5	875.2	875.3	877.3	878.1	886.7	885.9	889.1	898.3	906.6	909.2	935.2	904.9	1101.1	0.000110277	1.1059e-05	9.92176e-05	8.97169	9.52874
kneb	CZ	2014	0.592	892.2	757.8	1843.8	882.8	968.8	1179.7	756.8	806.7	829.1	841.7	854.5	863.6	874.2	879.1	880.7	883.8	884.8	889.6	895	901.2	903.8	905.6	910.8	938.3	906	1133.5	0.000120983	1.67319e-05	0.000104251	6.23067	7.94535
kneb	CZ	2014	0.576	924.2	742.2	1835.9	890.6	984.4	1179.7	774.5	780.7	815.6	846	855.5	861	873.3	879.2	882.1	888.3	887.1	891	896.9	902.4	906.5	909.8	922.3	939.1	920.5	1122.9	0.000131008	1.09167e-05	0.000120091	11.0006	10.4142
kneb	CZ	2014	0.576	910.7	734.4	1835.9	882.8	992.2	1250	759.4	776.9	823.5	837.3	846.1	856.9	870.6	873.2	883.7	892.7	897.1	899.5	904.2	906.8	914.7	916.4	914.1	922.6	1131	1115.8	0.000126004	9.34384e-06	0.00011666	12.4852	10.964
kneb	CZ	2014	0.592	892.4	750	1835.9	882.8	992.2	1156.3	798.2	821.7	834.8	858.2	866.9	870.3	875.3	882.7	886.7	886.8	889.7	894.3	893.5	899.4	904.6	905.4	913.5	923.2	933.3	1089.1	0.000126575	1.50425e-05	0.000111532	7.41449	8.70081
kneb	CZ	2014	0.568	906.7	757.8	1851.6	890.6	992.2	1226.6	800	824.4	837.9	856.1	864.5	879.5	886	890	895.8	895.5	901.1	905.8	905	911.5	913.1	913.9	916	922.7	1127.2	1130.1	0.000142829	1.73106e-05	0.000125518	7.25094	8.60394
kneb	CZ	2014	0.576	918.8	765.6	1796.9	890.6	968.8	1171.9	808	823.6	845.2	861	870.7	880.9	887.8	894.8	900.3	906.3	911.1	917.8	917.7	917.1	915.7	916.4	915.8	936.1	928.3	1320.5	0.000138988	1.13009e-05	0.000127687	11.2988	10.5303
kneb	CZ	2014	0.576	924.2	757.8	1828.1	890.6	976.6	1289.1	806	820.4	836.4	854.9	869.3	880.8	888.9	893.4	895.8	894.6	898	902.3	907.3	911.6	917.1	916	921	939.7	923.9	1124.7	0.000145836	1.60315e-05	0.000129804	8.09682	9.08315
kneb	CZ	2014	0.56	907.4	523.4	1843.8	875	960.9	1132.8	791.8	804.1	827.6	847.2	858.4	872.1	878.7	882.8	888.7	887.8	892.4	894.3	901.4	904.9	907.7	905.6	904.9	910.9	548.8	910.6	0.000122215	7.25258e-06	0.000114962	15.8512	12.0006
kneb	CZ	2014	0.552	890.8	718.8	1835.9	867.2	992.2	1523.4	756.5	776.5	805	822.4	833.9	839.4	841	855.6	860.3	863.4	878.9	883.5	886.1	888.4	893.1	893.3	895.8	901.4	1108.7	1125.8	5.41334e-05	5.23267e-06	4.89007e-05	9.34526	9.70591
kneb	CZ	2014	0.576	906.4	742.2	1859.4	890.6	1039.1	1453.1	769.3	781.4	811.2	827	843.8	859.2	862.1	867.3	877.8	888.2	889.6	894.1	899.1	905.6	909.6	908.2	914.8	912.2	911.8	1118.8	6.97349e-05	6.26856e-06	6.34664e-05	10.1245	10.0538
kneb	CZ	2014	0.576	926.1	750	1843.8	882.8	953.1	1593.8	779.3	792.3	812.9	835.7	841.9	846.7	857	865.1	871.8	877.1	883.5	883.5	886.8	886.1	891.3	889.2	890.9	899	928.4	957.5	0.000141165	1.27261e-05	0.000128439	10.0926	10.04
kneb	CZ	2014	0.536	1085.4	765.6	1851.6	906.3	1031.3	1242.2	781.5	795.5	831.2	846.2	862.7	868.5	879.9	887.3	895.2	897.1	901.2	906.3	906.4	909.4	912.4	908	910.9	918.3	1083.7	1079.1	0.000149821	6.56348e-06	0.000143257	21.8264	13.3898
kneb	CZ	2014	0.552	926	765.6	1882.8	906.3	1031.3	1320.3	805.6	826.3	841.5	854.6	871.1	878.7	884	891.2	899.2	903.3	908.6	910.4	916.6	920.1	921.3	925.2	927.3	930.2	961.1	1109.9	0.000158325	1.13249e-05	0.000147	12.9802	11.1328
kneb	CZ	2014	0.544	933.5	789.1	1882.8	914.1	1023.4	1226.6	822.7	842.1	858.8	871.9	885.6	892.2	896.4	902.8	908.6	913.4	911.8	908.5	914.3	920.6	922.6	925.8	928.9	934	976.3	1119.1	0.000169252	1.14119e-05	0.00015784	13.8312	11.4086
kneb	CZ	2014	0.52	1120	734.4	1820.3	875	1054.7	1226.6	752.8	768.9	776.8	796.8	806.4	821.5	826	837.7	845.9	850.3	850.5	855.9	863.6	865	864.2	869.1	880.7	1113	1124.4	1135.5	9.49759e-05	3.38759e-06	9.15883e-05	27.0364	14.3195
kneb	CZ	2014	0.6	887.4	734.4	1828.1	882.8	1070.3	1367.2	761.5	773.3	809.7	824.4	829.9	843.8	854.1	863.4	866.5	865.6	872.2	876.3	881.8	887.3	890.3	892.3	889.5	901.3	1121.9	873.4	8.81419e-05	8.16088e-06	7.9981e-05	9.80054	9.9125
kneb	CZ	2014	0.576	1133.2	742.2	1867.2	898.4	1023.4	1210.9	794.9	807.1	837.6	855.6	866.3	873.5	882.4	888.8	894.7	896.9	906.3	913.3	914.8	919.2	921.6	927.8	1107.5	924.5	1139.6	1114.7	8.79372e-05	8.86666e-06	7.90705e-05	8.91773	9.50254
kneb	CZ	2014	0.56	1132.7	757.8	1859.4	898.4	1023.4	1187.5	807.1	823	838.6	858.3	870.8	883	890.8	896.5	899.2	905.6	912.9	917.9	915.9	918.6	921.3	924.3	925.1	946.2	1136.7	1126.7	6.51509e-05	6.85912e-06	5.82918e-05	8.49843	9.29339
kneb	CZ	2014	0.544	932.5	804.7	1875	914.1	1015.6	1164.1	821.6	830.8	855.9	871.4	882.6	887.2	893.9	899.5	903.8	913.4	916	924	921.7	926.2	926.9	930.2	932.4	933.2	1130.2	933.4	0.000219081	1.3369e-05	0.000205712	15.3873	11.8716
meta	CZ	2013	0.688	1582.1	671.9	1867.2	898.4	1484.4	1609.4	660	712.8	717.2	733.2	742.3	753.5	761.6	774.3	782.9	791.6	809	813.6	822.5	830.1	831.5	827.2	830.8	838.1	886.6	1576.5	0.000129375	2.95128e-07	0.00012908	437.368	26.4085
meta	CZ	2013	0.696	863.2	679.7	1804.7	867.2	1421.9	1625	623.3	665.4	713.8	731	738.8	743.1	752.7	766.2	771.5	772.4	788.5	805	803.2	810.3	815.8	812.9	823.8	837.7	868.9	864.2	5.49108e-05	1.90037e-07	5.47208e-05	287.948	24.5931
meta	CZ	2013	0.664	1585.4	664.1	1828.1	882.8	1515.6	1632.8	654.6	685.7	716.4	725.7	760.8	769.6	781.4	788.6	795.5	809.7	821.2	823.5	815	821.3	828.7	814.7	821.5	841.9	877.4	896.5	9.66181e-05	1.57843e-07	9.64603e-05	611.116	27.8612
meta	CZ	2013	0.672	1568.5	664.1	1750	867.2	1507.8	1601.6	659.2	657	720.5	726.8	743	759.4	770.2	773.3	780.5	785	809.4	808.3	806.7	810.5	812.3	818.6	823.6	834.9	852.4	842	9.38985e-05	1.98427e-07	9.37e-05	472.215	26.7414
meta	CZ	2013	0.696	1587.9	695.3	1835.9	890.6	1468.8	1625	621.4	669.9	738.8	745.7	750.1	753.9	764.1	778.6	791.5	801.4	808.4	816.8	815.3	819.3	830.2	819.4	822.2	842.5	890.2	915.1	0.000112565	2.73817e-07	0.000112291	410.094	26.1288	-20
meta	CZ	2013	0.648	1579.8	703.1	1859.4	890.6	1500	1625	656	731.6	730.3	751	758.2	779.1	789.2	789.7	811.6	806.4	813.3	826.3	829.5	838.6	847.8	846.7	851.5	860.6	892.6	920.9	0.00012175	2.27008e-07	0.000121523	535.326	27.2862	-10
meta	CZ	2013	0.656	1582.1	664.1	1804.7	867.2	1476.6	1617.2	662.6	687	694.9	714.1	730.9	751.2	756	764.9	779.5	789.4	789.9	796.4	790.5	799.6	805	804	820.3	835.6	853.2	864.3	7.65434e-05	2.86746e-07	7.62566e-05	265.938	24.2478	-20
meta	CZ	2013	0.68	1582.7	531.3	1773.4	843.8	1429.7	1578.1	647.1	689.2	710.8	726.4	728.9	753.7	756.3	767.7	780.7	776.1	777.2	782.9	785.4	786	796.7	789	788.9	806.8	807.4	834.6	7.528e-05	3.90545e-07	7.48895e-05	191.756	22.8275
meta	CZ	2013	0.648	1602.3	507.8	1875	882.8	1468.8	1617.2	658.5	711.8	730.1	731.2	743.7	749.7	760.6	768.2	779.4	793.8	801.4	811.7	821.6	824	830.7	833.9	841.4	851.2	874	936.7	5.21146e-05	4.19469e-06	4.79199e-05	11.4239	10.5782
meta	CZ	2013	0.688	1609.7	671.9	1867.2	890.6	1492.2	1640.6	670.4	722.3	722.9	739.1	760.9	769.9	776.5	782.3	798.2	811.4	816.8	831.1	836.7	843.8	836.5	844.5	847.6	859.1	884.8	899.3	6.08601e-05	9.34887e-06	5.15113e-05	5.50989	7.41143
meta	CZ	2013	0.672	1607.9	703.1	1882.8	890.6	1492.2	1632.8	640.1	735.9	745.9	761.8	767.5	786.3	791	801.8	807.2	806.1	827.5	830.1	832.4	846.8	851.6	845.8	837.7	846.6	863.1	860.6	6.16304e-05	2.1989e-07	6.14105e-05	279.278	24.4604
meta	CZ	2013	0.72	889.5	617.2	1882.8	890.6	1476.6	1617.2	614.9	736.9	745.9	760.7	776.1	789.8	801.7	804.3	808.1	817.6	822.7	824.2	831.7	830.6	843.5	837.7	839.4	888.4	894.9	888.3	5.5879e-05	2.38785e-07	5.56402e-05	233.014	23.6738
meta	CZ	2013	0.68	906.7	710.9	1882.8	890.6	1343.8	1648.4	651.9	748.9	764.8	784.1	793.1	811.4	828.3	828.8	837	851.8	859.6	871	873	882.9	883.6	886.9	884	896.2	911.2	958.3	7.24681e-05	2.91224e-07	7.21769e-05	247.84	23.9417
meta	CZ	2013	0.72	1570.6	593.8	1890.6	914.1	1500	1648.4	598.7	738.4	772.2	785.5	793.5	802.1	815	813.9	831	849.9	854.9	856	856.6	858.4	859.7	857.5	852.3	869.6	897	851.7	0.00013336	8.58873e-07	0.000132501	154.273	21.8829
meta	CZ	2013	0.752	897.1	734.4	1906.3	921.9	1515.6	1671.9	1190.1	1563.7	740.3	773.2	786.1	795.9	806.4	829.6	839.1	839.3	856.3	860.1	866.9	886.4	886	885.7	892.4	897.8	882.8	921.4	0.00018931	1.49005e-05	0.00017441	11.705	10.6837
meta	CZ	2013	0.696	908.6	757.8	1890.6	921.9	1531.3	1703.1	668.2	774.4	798.6	814.4	824.8	834.1	856.5	788.8	864.7	871.1	866.6	882.6	890.1	893.1	898.5	900	901.4	903.1	912.1	903	0.000196322	1.0058e-05	0.000186264	18.519	12.6762
meta	CZ	2013	0.656	908	757.8	1875	906.3	1437.5	1695.3	656.5	802.6	812.1	823.8	837.1	855.7	863.1	872.5	877.8	885	889.3	899.7	904.4	900.5	898.2	909.5	903.5	910.6	913.3	945.8	0.000118503	7.63089e-07	0.000117739	154.293	21.8835
meta	CZ	2013	0.704	930.3	773.4	1906.3	937.5	1468.8	1734.4	609	766.9	818.9	824.3	838.7	858.2	869.7	875.2	884.1	885.7	899	899.6	918.3	918.4	928.4	932.1	922.5	916.9	925.2	991.6	0.000310096	2.41047e-06	0.000307686	127.646	21.0601
meta	CZ	2013	0.68	894.7	734.4	1843.8	898.4	1515.6	1695.3	603.2	783.9	813.1	823.5	825.7	844.6	860.9	868.5	877.9	883.1	887.3	888.2	891.1	888.4	897.2	901.2	895.9	895.7	900.7	909.2	0.000189215	1.6574e-06	0.000187558	113.164	20.5371
meta	CZ	2013	0.656	922.4	750	1921.9	929.7	1406.3	1718.8	610.3	802.8	812.7	820.9	827.2	837.6	850.5	863.8	878.3	879	886.8	894.8	897.7	909.5	911.4	913.1	910.5	918.3	932.9	612.6	0.000187838	4.9761e-07	0.00018734	376.48	25.7574
meta	CZ	2013	0.592	900.3	750	1906.3	914.1	1382.8	1718.8	663.7	792.7	828.9	831	848	845.1	857.4	866.3	871.6	883.4	884.4	887.2	900.3	905.4	900.9	901	893.8	905.2	929.2	965.7	0.000161969	3.0792e-07	0.000161661	525.011	27.2017
meta	CZ	2013	0.68	914.2	757.8	1906.3	921.9	1406.3	1703.1	597.6	779.6	810.7	823.2	838	857.5	868	874.1	886.4	894.2	898	914.4	915.7	919.3	918.5	915.2	915.7	915.1	926.3	1317.7	0.000220137	2.67516e-07	0.000219869	821.891	29.1481
meta	CZ	2013	0.648	898.1	718.8	1882.8	898.4	1500	1679.7	687.6	756.9	787.4	803.5	814.5	816.2	841.1	840.8	859.6	865.7	868.8	873.1	887.1	887	894.6	894.4	885	894.4	919.7	812.7	0.000104824	3.39574e-07	0.000104484	307.692	24.8812
meta	CZ	2013	0.68	911.9	750	1898.4	914.1	1468.8	1679.7	602.3	768.8	788.1	805.5	811.8	825.6	846.6	855.5	860.8	878.1	887.9	892.7	896.6	898.1	899.8	898.9	901.7	909.5	921.1	916.4	0.000145153	3.55832e-07	0.000144798	406.927	26.0952
meta	CZ	2013	0.664	921.3	757.8	1898.4	914.1	1375	1703.1	663.7	788.2	803.2	817.8	824	834.5	851.6	862.3	872	884.7	893.6	904.3	917.7	917.6	914.7	915.8	916.9	918.1	926.4	1190	0.000154202	4.10733e-07	0.000153792	374.432	25.7337
meta	CZ	2013	0.672	924.8	609.4	1906.3	937.5	1500	1726.6	663.1	770.7	813.1	817.1	825.6	838	852.2	858.8	856	854.5	871	882.1	885	893.2	897.8	900	903.4	918.2	928.3	508.8	0.000154905	3.35406e-07	0.00015457	460.844	26.6355
meta	CZ	2013	0.68	927.5	617.2	1898.4	945.3	1554.7	1710.9	602	790.7	805.4	819.9	826.8	848.9	864.7	882.1	884.4	891	898.6	908.7	913.3	922.1	925.4	923.8	923.1	924.7	929.4	923.9	0.000193262	2.56171e-07	0.000193006	753.425	28.7704
meta	CZ	2013	0.672	1774.4	601.6	1906.3	921.9	1484.4	1703.1	667.9	773.8	796.8	814.3	828.2	841.6	855.9	866.9	869.5	879.7	888.1	905.8	900.6	903	900.8	907.3	901.6	904.8	919.3	1045.5	0.000127933	2.3318e-07	0.0001277	547.644	27.385
meta	CZ	2013	0.656	925.5	695.3	1914.1	914.1	1265.6	1648.4	718.1	779.2	792.4	805.1	822.8	832.2	853.5	863.7	867.5	880.5	883.8	899.1	904.7	905.8	908	915.7	918.8	921.4	934.6	1133.5	0.000120649	2.48078e-07	0.000120401	485.337	26.8604
meta	CZ	2013	0.656	1767.1	601.6	1906.3	914.1	1453.1	1695.3	583	743.3	766.4	769.6	792.2	804.2	816.4	828.7	832.5	833.8	856.7	857.6	866.6	881.4	881.6	879.1	876.4	893.5	913.9	1425.6	9.46379e-05	4.20756e-07	9.42171e-05	223.923	23.501
meta	CZ	2013	0.688	932.6	632.8	1906.3	937.5	1460.9	1734.4	663	782.3	814.8	828.1	834.3	839.8	859.6	868.1	873	874.2	885.7	889.1	890.8	903.4	899.6	906.8	915.6	922.2	937.5	1288.5	0.000146564	6.29964e-07	0.000145934	231.655	23.6484
meta	CZ	2013	0.712	923.6	695.3	1906.3	929.7	1406.3	1750	581.7	790.7	825.7	821.6	832.4	853.4	862.2	876.1	882.4	887.7	894.2	907	910.6	914	922.9	923.7	916.9	916.7	939.5	1013.3	0.000191785	9.21971e-07	0.000190863	207.016	23.16
pala	CZ	2014	0.512	1620.4	531.3	1859.4	968.8	1351.6	1585.9	586	620.2	634.5	670.5	697.1	719	754.5	757.2	786.4	795.5	798.7	804.5	814	815.5	814.7	816.9	828.2	855.9	959.1	1023.9	5.73746e-06	1.28393e-07	5.60907e-06	43.6867	16.4035
pala	CZ	2014	0.496	1539.6	578.1	1851.6	984.4	1398.4	1585.9	583	1230.3	627.9	659.9	667.1	1396.4	707.8	703.9	759.4	766	773.1	781.3	778.6	786.9	801.7	811.8	845.3	783.8	935.8	518.5	4.33704e-06	5.83418e-08	4.2787e-06	73.3385	18.6533
pala	CZ	2014	0.368	1542.2	562.5	1835.9	1164.1	1406.3	1562.5	576.2	587.5	596.1	623.7	646.9	638.8	688	658.5	726.7	757.5	1537.6	772.1	780	779	709.2	778.6	774.8	810	790.2	754.5	3.17678e-06	5.20721e-08	3.12471e-06	60.0074	17.782
pala	CZ	2014	0.464	1660	601.6	1851.6	984.4	1398.4	1601.6	615.5	619.1	669.6	687.8	671.6	750.6	767.1	777.9	769.3	808.8	803.3	810.8	816.2	814	832.6	834	834.7	858.7	935.5	974.1	4.98946e-06	6.2136e-08	4.92732e-06	79.299	18.9927
pala	CZ	2014	0.552	1658.7	601.6	1851.6	968.8	1359.4	1585.9	587.6	584.8	662.5	685.5	1416.6	758.5	775.4	755.9	783.1	816	757	787.1	832.5	835.6	825.1	879.9	976.3	939	824	826.5	3.69546e-06	5.42842e-08	3.64118e-06	67.0762	18.2657	-15
pala	CZ	2014	0.48	1648.7	601.6	1859.4	976.6	1382.8	1601.6	593.8	619.4	646.2	674	623.6	710	749.1	773.1	778.1	789.5	804.6	814.6	823.8	827.5	782.9	829.1	826	780.2	831.9	831.4	4.36287e-06	1.17694e-08	4.3511e-06	369.698	25.6785	-10
pala	CZ	2014	0.52	1700.5	609.4	1851.6	968.8	1359.4	1625	588.1	584.9	669.8	705	676.9	768.7	711.3	808.3	815.9	839.7	838.8	850.1	853.3	854.9	858.3	856	857.7	972.1	972.6	860.8	6.06979e-06	1.80723e-08	6.05172e-06	334.861	25.2486	-10
pala	CZ	2014	0.48	1663.6	601.6	1859.4	984.4	1398.4	1593.8	610	639.7	646.1	613	687.7	706.2	734.4	709.5	772.1	780.7	787.7	797.1	797.2	803.4	793.6	808.8	791.7	781.2	875.2	970.7	4.74115e-06	1.78011e-08	4.72335e-06	265.341	24.238
pala	CZ	2014	0.512	1621.4	585.9	1859.4	960.9	1289.1	1562.5	576.1	1238.9	619.1	688.3	700.1	725.9	766.8	790.1	793	802.3	812.7	814.9	821.1	794.8	831.1	834.6	820.2	972.8	1021	812.4	8.51642e-06	3.0319e-08	8.4861e-06	279.894	24.4699
pala	CZ	2014	0.48	1624.2	609.4	1851.6	968.8	1343.8	1578.1	587.3	599.5	646.4	638	700.2	714.1	746.3	710.9	0	789.8	1593	782	810	814.2	827.5	828.5	836.3	840.2	836.4	972.8	7.36474e-06	1.6003e-07	7.20471e-06	45.0211	16.5342
pala	CZ	2014	0.472	845.5	609.4	1851.6	968.8	1375	1593.8	592.3	642.7	663.9	687.9	664.6	737.8	705.1	772.1	788.7	797.6	745.4	819.3	799	835.5	795.5	852	851.3	848.2	853.7	970.4	9.106e-06	2.6729e-08	9.07927e-06	339.679	25.3107
pala	CZ	2014	0.472	1622.8	601.6	1851.6	984.4	1343.8	1554.7	608.2	620.9	646.2	668.3	678.9	699.7	733	744.3	758	769.1	741.4	747.4	741.2	770.9	786.2	814	796.1	806.9	836.4	817.5	6.33402e-06	2.68677e-08	6.30716e-06	234.748	23.706
pala	CZ	2014	0.496	1629.9	601.6	1859.4	945.3	1320.3	1578.1	599.5	610.3	656.3	639.9	703	744.7	704.4	773.3	795.5	804.7	814	770.2	790.4	835.1	839.4	838.9	839.2	852.8	968.3	827.7	7.37618e-06	3.09993e-08	7.34518e-06	236.947	23.7465
pala	CZ	2014	0.464	845.1	593.8	1859.4	953.1	1312.5	1578.1	578.8	609.1	644.5	670.2	687.7	668.3	745.3	754.1	705.8	754.7	751.8	746.9	813.3	823.2	832.6	840.2	847	853.5	847.2	1026.3	7.98844e-06	2.61515e-08	7.96229e-06	304.467	24.8354
pala	CZ	2014	0.472	1619.5	609.4	1859.4	992.2	1390.6	1578.1	593.8	643	667	685.4	674.6	708.6	747.9	757.6	767.8	782.7	788.1	795	800.3	806.1	822.4	809.7	814.9	816.8	923.7	1023.5	7.93488e-06	1.48243e-08	7.92005e-06	534.261	27.2775
pala	CZ	2014	0.472	1555.1	609.4	1859.4	1015.6	1375	1601.6	537.8	612.5	642	1169.7	687.3	653	753.4	768.6	776.8	786.2	799.3	820	832.1	831.7	849.2	852.4	857	860.2	962.1	1115.5	1.13672e-05	1.68369e-08	1.13503e-05	674.133	28.2875
pala	CZ	2014	0.528	1493.6	507.8	1867.2	960.9	1328.1	1546.9	551.7	546	610.4	622.4	658	660	687.1	720.3	738.1	751.5	725.4	782.1	774.7	738.2	786.4	730.9	856.5	867	971.9	946.1	3.83471e-06	2.55732e-08	3.80914e-06	148.95	21.7304
pala	CZ	2014	0.488	1541.3	507.8	1859.4	960.9	1328.1	1570.3	591.5	1269.2	599.4	667	690.3	697.6	759.7	768	774.2	787.2	794.3	776	803	806.4	805.3	805.9	835.9	798	970.9	514.7	5.42869e-06	1.67126e-08	5.41198e-06	323.827	25.1031
pala	CZ	2014	0.576	1626.7	632.8	1875	968.8	1398.4	1593.8	587.1	615.7	660.6	692.4	708.8	746.9	735.5	787.1	799.7	813.3	815.5	818.3	821.8	820.2	819.1	872.3	966.9	823.8	816.8	831	6.88158e-06	8.05925e-08	6.80099e-06	84.3874	19.2628
pala	CZ	2014	0.496	1541.2	593.8	1867.2	945.3	1367.2	1570.3	599.4	598.2	653.9	672.1	686.9	709.6	742.3	756.2	766.2	769.8	777.3	785.2	791	775.2	800.9	796.8	804.8	812.7	927	534.8	6.79044e-06	1.09263e-08	6.77952e-06	620.478	27.9273
pala	CZ	2014	0.464	1615.4	578.1	1859.4	968.8	1375	1570.3	557.2	589.9	640.5	652.4	653.2	685.9	710.2	748.4	758.3	767.1	780.3	783.8	782.9	795.5	812.5	808.8	804.3	812.7	907.7	971.7	5.64798e-06	1.1472e-08	5.63651e-06	491.326	26.9137
pala	CZ	2014	0.496	1623.3	593.8	1867.2	937.5	1375	1585.9	1227.5	646.4	629.1	686.5	728.5	744.8	753	776.7	787.8	746.4	811.2	824.8	816.1	782.1	788.9	818.8	824.2	866.6	944.3	825.8	5.49698e-06	3.03455e-08	5.46663e-06	180.146	22.5563
pala	CZ	2014	0.512	1625.9	617.2	1835.9	898.4	1281.3	1546.9	638.2	639.5	656.2	668.9	682.2	644	694.3	767	786	803.7	806	776.9	784	817.5	832.8	828.3	824.5	835.7	965.6	511.2	5.86533e-06	2.38363e-08	5.8415e-06	245.068	23.8929
pala	CZ	2014	0.56	844.7	601.6	1851.6	890.6	1234.4	1531.3	616.6	612.3	641.1	983	1242.4	692.9	740.4	755	786	783.2	815.8	816.3	814.9	816.7	832.5	856	910.8	970.5	941.4	818.3	5.57403e-06	4.86222e-08	5.52541e-06	113.64	20.5553
pala	CZ	2014	0.488	850.5	632.8	1859.4	906.3	1359.4	1593.8	638.6	640.4	1337.6	683	644.4	741.1	702.8	765.5	776.2	782.7	799.7	805	812	786.1	823.9	832	846.7	854.4	895	871.4	5.4169e-06	2.45776e-08	5.39232e-06	219.4	23.4124
pala	CZ	2014	0.456	834.8	562.5	1820.3	835.9	1109.4	1554.7	630.9	639.5	603.4	631	676.3	747.9	677.4	774.9	777.2	776.9	776.4	749.2	794.6	812	775.4	806	841.6	824.1	821.5	912.7	1.52245e-06	1.74262e-08	1.50503e-06	86.3658	19.3634
poda	CZ	2013	0.656	982.2	687.5	1890.6	914.1	1007.8	1492.2	679	714.5	729.1	805.3	804.1	886.2	909.8	929.7	948.7	951.9	974.5	977.1	981.3	981	985.1	990.9	989.1	986.4	980.8	1020.1	0.00011909	7.79474e-07	0.00011831	151.782	21.8122
poda	CZ	2013	0.776	994.6	687.5	1867.2	914.1	1007.8	1460.9	567.1	682.1	699.5	755.8	864.1	893.6	914.4	928.8	970	981.8	992.6	995	997.8	999.7	997.3	998.3	994.7	1009.4	998	1002.5	0.000193461	1.93638e-06	0.000191525	98.9089	19.9524
poda	CZ	2013	0.64	989	695.3	1921.9	921.9	1015.6	1570.3	739.1	709.6	751.6	847.9	818.7	907	925.8	934.1	947.1	970.5	970.8	981.4	987.4	986.9	1000	991.3	992.9	981.8	970.9	1334.6	0.000129749	1.4383e-07	0.000129605	901.1	29.5477
poda	CZ	2013	0.68	970.5	726.6	1945.3	906.3	1007.8	1664.1	764.3	729.8	746.6	756.9	872.3	913.3	915.3	923.9	929.7	950.2	963	964.2	967.6	973.7	972.6	976.9	968.1	958.5	949.4	530.9	0.000106915	1.06504e-06	0.00010585	99.3861	19.9733
poda	CZ	2013	0.64	1008.2	734.4	1882.8	929.7	1015.6	1445.3	764.1	761.1	766.4	800.5	903.5	922.7	954.3	975.4	985.5	992.8	999	1009.2	1012.8	1015.2	1017.6	1009.8	1005.6	1005	1001.4	1024.2	0.000166157	3.68007e-07	0.000165789	450.504	26.537	-20
poda	CZ	2013	0.616	1003.8	781.3	1851.6	937.5	1007.8	1265.6	813.6	808.4	867.9	917.4	945.4	975.8	987.8	994.1	1001.2	1010.9	1012.2	1014.4	1011.1	1008.5	1004.7	1008.2	1004.9	1001.6	990.2	1019.8	0.000210815	1.75728e-06	0.000209058	118.967	20.7542	-10
poda	CZ	2013	0.648	1016.1	765.6	1851.6	937.5	1015.6	1234.4	789.5	786.9	849.7	900.9	892.4	989.6	999.1	1004.8	1016.8	1017.7	1020.1	1025.2	1023.4	1022.9	1019	1019.7	1012.8	1010	1007	1026.5	0.000318021	1.17712e-06	0.000316844	269.169	24.3003	-15
poda	CZ	2013	0.656	1015.7	828.1	1859.4	960.9	1023.4	1234.4	869.9	856.7	872.8	925.5	990.9	999.7	1002.9	1018.8	1022.7	1024	1022.2	1024.5	1023.6	1025.1	1023.4	1021.1	1021.1	1017.5	1010.8	1033.7	0.000386871	6.70755e-07	0.0003862	575.769	27.6025
poda	CZ	2013	0.68	1024.2	835.9	1835.9	960.9	1031.3	1242.2	566.4	882.1	854.8	890.7	953.5	996.3	995.8	1011.5	1014.4	1017.7	1023.2	1033.4	1032.5	1025.1	1021.7	1023.6	1018.4	1016.4	1007.1	508.2	0.000314333	3.37216e-07	0.000313996	931.141	29.6902
poda	CZ	2013	0.64	998.6	742.2	1914.1	921.9	1007.8	1531.3	791.5	768.6	807.4	883.3	890.3	940.8	962.9	970.9	985.8	995.2	994.3	994	998.9	1013.8	1003.6	995	994.8	989.2	972.9	1038.2	0.000153755	4.56242e-07	0.000153299	336.004	25.2634
poda	CZ	2013	0.656	1008.4	750	1898.4	945.3	1023.4	1351.6	779.1	766.6	844.4	921.9	932.6	966.5	981.6	993.3	1000.2	1011.4	1011.5	1015.4	1011.3	1008.2	1010.3	1002.8	998.2	1005.9	1022.8	1003.3	0.000215065	9.84068e-07	0.000214081	217.547	23.3755
poda	CZ	2013	0.616	998.4	757.8	1867.2	937.5	1015.6	1289.1	770.2	772.2	854.2	887.6	920.1	964.8	983.3	986.8	982.2	985.8	996.4	1000.7	1015	1001	1001.8	1004.2	1003.9	1005.8	1004.8	1014.6	0.000243986	1.86288e-06	0.000242123	129.972	21.1385
poda	CZ	2013	0.712	1000.4	812.5	1773.4	945.3	1015.6	1273.4	562.6	854.9	852.8	868	950.2	968.7	983.8	991.8	1004.6	1017.8	1013	1008.8	1005.6	1006.9	1005.5	1002.3	998	988.7	1000.5	997.1	0.000266011	2.98174e-06	0.000263029	88.2133	19.4553
poda	CZ	2013	0.616	1003.1	765.6	1859.4	937.5	1007.8	1171.9	792.6	778.1	780.9	911.4	948.4	980.7	987.5	998.4	1005.5	1009.7	1013.6	1017.6	1022.4	1022.9	1020.6	1023	1016.6	1016.9	1015.6	1028.9	0.000311746	6.49295e-08	0.000311681	4800.3	36.8127
poda	CZ	2013	0.672	983.3	726.6	1914.1	906.3	984.4	1531.3	760.8	745.7	726.5	863.4	923.9	949.4	967.7	961.6	975.7	982.8	989	990	985.2	988.2	983.3	984	989.2	986	938.5	1021.9	0.000143141	3.44645e-07	0.000142797	414.329	26.1735
poda	CZ	2013	0.488	1008.3	734.4	1875	914.1	1000	1507.8	794.8	765	749	825.8	880.6	918.9	895.4	971.1	976.4	977.5	990.1	999	994.3	1010	1016.5	1015.1	992.5	985.6	906.9	857.6	0.000106881	6.08123e-08	0.00010682	1756.55	32.4466
poda	CZ	2013	0.632	991.9	687.5	1921.9	914.1	1007.8	1492.2	667.4	711.7	728.2	839.3	861.6	902.8	927.4	967.6	975.3	983.7	988.9	994	1002.2	1004	995.6	994.5	992.1	991.7	992	1011.9	0.000170462	4.37188e-07	0.000170025	388.906	25.8984
poda	CZ	2013	0.648	1007.1	773.4	1898.4	937.5	1015.6	1546.9	810.9	795.1	855.6	905.4	917.8	930.7	963	975.2	990.6	995.4	1003.4	1007.7	1010.1	1010.7	1005.2	998.6	1002	1002.2	1011.9	1005.5	0.000191645	8.60458e-07	0.000190784	221.724	23.4581
poda	CZ	2013	0.76	1001.7	804.7	1914.1	937.5	1015.6	1304.7	572.6	877.1	856.5	920.7	947.5	980.4	1003	1005.1	1014	1013.5	1020.3	1019.3	1013.7	1009.6	1005.3	1005.2	990.8	1001.7	1000	1007.9	0.000188872	1.4502e-07	0.000188727	1301.39	31.1441
poda	CZ	2013	0.728	1001.5	812.5	1875	945.3	1015.6	1328.1	580	864.6	840	911.8	949.2	972.4	995.9	1010.1	1018.3	1025.5	1019.4	1020.9	1017.3	1005	998.7	992.4	990.7	984.6	1003.2	1343.1	0.000256482	4.86471e-06	0.000251617	51.7229	17.1368
poda	CZ	2013	0.632	1022.7	789.1	1835.9	945.3	1023.4	1257.8	824.5	811	865.4	920.2	973.7	986.1	992.3	1005.1	1000.5	1015.4	1014.5	1019	1021.2	1026.3	1030	1025.2	1018.4	1014.4	1005.2	1020.3	0.000275793	2.71246e-06	0.000273081	100.676	20.0293
poda	CZ	2013	0.608	1010.1	804.7	1765.6	929.7	1007.8	1140.6	837.3	818.9	825.5	940	978.8	988.4	1003.7	1012.2	1015.7	1010.4	1007.9	1010.8	1012.7	1015.8	1018.2	1017.1	1007.2	992.8	979.9	972	0.00020174	5.04071e-08	0.00020169	4001.22	36.0219
poda	CZ	2013	0.632	941.5	585.9	1929.7	875	984.4	1625	670.4	697.3	716.5	784.2	818.6	844.3	870.8	909.1	910	921.1	920.1	954.3	943.1	940.5	947	948.4	949.8	927.4	920.8	1206.3	5.4355e-05	1.19032e-05	4.24518e-05	3.56641	5.52231
poda	CZ	2013	0.664	992.6	726.6	1835.9	890.6	976.6	1132.8	740.1	758	769	858.8	906.6	947.9	969.6	889.6	988.3	995.6	998.6	993.9	996.4	998.9	997.3	994.4	993.1	992.3	988.3	1002.5	0.000186991	4.40316e-05	0.00014296	3.24675	5.11449
raca	CZ	2013	1.192	1141.4	593.8	1914.1	953.1	1171.9	1539.1	541.1	637.3	736.9	816.3	859.8	893.1	911.9	927.6	930.4	935.6	944.4	1118.2	1126.2	941.1	1167.7	1160	1151.9	1167.5	1186.7	564.1	0.000350219	1.02881e-06	0.00034919	339.413	25.3073
raca	CZ	2013	1.216	1142.2	585.9	1875	929.7	1179.7	1476.6	537.1	650.8	734	778.6	836	871	885.9	899.6	914.8	913.6	921	916.6	1121.2	1154.7	1185.8	1166.7	1167.4	1200.1	1198.4	576.8	0.000318701	2.23994e-06	0.000316461	141.281	21.5008
raca	CZ	2013	1.16	1170.7	687.5	1921.9	976.6	1203.1	1671.9	551.9	690.6	763.3	825.9	867	902.5	915	931.4	932.6	950	960.9	964.3	968.5	957.2	962.8	966.6	1182.4	1178.9	1222.6	1176.9	0.000373508	5.8227e-06	0.000367686	63.147	18.0035
raca	CZ	2013	1.112	1177.8	710.9	1937.5	968.8	1179.7	1476.6	1051.8	668.7	796.2	812.2	893.3	908.2	928.2	942.4	502.7	951.3	965	965.3	968.9	965	954.4	1133.8	961	1189	957.4	956.2	0.000189396	1.47605e-06	0.00018792	127.313	21.0487
raca	CZ	2013	1.12	1169.7	625	1937.5	937.5	1187.5	1679.7	547.2	674.5	736.4	828.6	882.5	909.7	928	938.2	944.2	940.8	953.5	956.6	945.1	950.8	964.5	948.7	948.9	949.5	1182.1	1169.4	0.000211881	1.11749e-06	0.000210763	188.604	22.7555	-20
raca	CZ	2013	1.088	1175.9	687.5	1945.3	968.8	1195.3	1656.3	563.6	703.2	734.9	828.5	879.7	910.1	928.3	942.4	956.1	969.5	967.7	969.7	967	959.4	949.1	963.9	1180	1157.3	952	1316.2	0.000210455	2.34935e-07	0.00021022	894.801	29.5173	-10
raca	CZ	2013	1.168	1155	609.4	1945.3	960.9	1203.1	1726.6	535.5	679	741.6	829.7	886.2	906.9	936.3	943.4	951.3	894.7	960.6	967.3	964.8	954.6	937.8	921.8	958.4	1170.8	931.8	1157.1	0.000146446	5.32844e-07	0.000145914	273.839	24.375	-15
raca	CZ	2013	1.248	1144.9	710.9	1937.5	1031.3	1195.3	1679.7	1003.5	561.5	555.7	573.7	731.6	833.5	880.5	928	945.9	901.8	971.9	969.3	966.7	964.1	960.8	957.8	1139.9	953.8	958.5	1413.2	0.000294995	3.51084e-05	0.000259887	7.4024	8.69372
raca	CZ	2013	1.152	1171.4	570.3	1929.7	937.5	1195.3	1492.2	550.7	641.9	716	740.5	843.4	876.4	890.2	918.9	935.3	948.7	953.3	965.4	961	949.4	1132.7	1164.6	949.4	953.7	1187.2	1197.3	0.000239631	1.85772e-06	0.000237773	127.992	21.0718
raca	CZ	2013	1.112	1164.1	679.7	1914.1	984.4	1195.3	1382.8	578.1	692.1	762.3	833.9	873.1	898.7	920.4	935.2	952.4	966.2	966.2	969.5	957.5	964	1172.9	1207.9	1201.1	1201.5	1232.8	1399.8	0.000458461	3.52785e-07	0.000458108	1298.55	31.1346
raca	CZ	2013	1.088	1173.5	695.3	1929.7	976.6	1203.1	1554.7	573.3	720.4	813	822.8	859.3	911.6	930.5	943.6	953.5	965.3	967.1	972	970.5	960	953	961.2	969.3	959.9	956.6	960.7	0.000204635	2.21513e-07	0.000204414	922.808	29.6511
raca	CZ	2013	0.992	1151.8	539.1	1898.4	929.7	1210.9	1648.4	542	619.5	663.3	668.9	744.2	783.8	836.7	867.9	878.2	889.5	909.2	926.4	929.3	931.9	929.7	930.9	923.7	916.1	916.8	1287.5	0.000147662	1.61018e-07	0.000147501	916.052	29.6192
raca	CZ	2013	0.976	1154.1	679.7	1929.7	968.8	1195.3	1554.7	559	690.6	742.7	843.3	879.6	909.8	931.4	939.7	951.9	960.8	961	959	960.2	965.7	968	960.4	950.3	958.9	959.8	1367.4	0.000181668	1.71129e-07	0.000181497	1060.58	30.2554
raca	CZ	2013	1.144	1181.6	671.9	1906.3	937.5	1179.7	1375	558	681.7	736.3	839.9	879.9	904	938.7	942.8	964.1	968.8	973.4	959.8	972.4	972.5	979.2	977.9	969.9	1184.5	975.6	976.4	0.000128711	2.20701e-07	0.00012849	582.192	27.6507
raca	CZ	2013	1.112	1175	703.1	1914.1	968.8	1179.7	1406.3	558.5	709.6	768.4	851.7	900.8	909.4	953.2	965.2	971.2	972.2	976.9	982.5	981.5	977.5	1169	1196.9	1177.5	976.1	1188	980	0.000265778	1.91972e-07	0.000265586	1383.46	31.4097
raca	CZ	2013	1.088	1170.6	601.6	1898.4	953.1	1148.4	1265.6	539.5	656.6	739	800.6	845.1	878.3	908.3	919.5	938.3	959.5	970.4	1125.5	1158.1	1169.6	1182.7	1210.6	1216.4	1204.9	1214.8	1301.9	0.00037795	1.72763e-07	0.000377778	2186.68	33.3978
raca	CZ	2013	1	1147.7	710.9	1882.8	1007.8	1148.4	1242.2	716.8	777.1	858.7	884.6	906.8	939.1	957.6	969.9	983	1007.1	960.5	983.3	1147.2	1181.2	1174	1164.4	1180.5	1189.9	1208.4	1267.3	0.000347408	2.55992e-07	0.000347152	1356.1	31.3229
raca	CZ	2013	1.104	1120.7	632.8	1898.4	968.8	1156.3	1281.3	1039.2	677.1	755.6	826.9	873.7	879.6	904	924.1	935	957.1	1099.4	927.9	1166.2	1194.2	1184.3	1195.3	1208.4	1200.4	1199.1	642.3	0.000431195	1.1158e-06	0.00043008	385.446	25.8596
raca	CZ	2013	1.136	1184.3	507.8	1789.1	945.3	1156.3	1257.8	524.9	741.2	830.7	839	936.8	811.6	998.3	913.9	992.8	549.4	997.1	1000	997.6	1002.9	1029.9	611.5	1229.2	1222.3	1002.6	1003.5	1.43969e-05	2.3168e-07	1.41652e-05	61.1411	17.8633
raca	CZ	2013	0.976	929.2	570.3	1890.6	898.4	1101.6	1460.9	617.2	687.9	733.2	793.3	840.5	858.3	872.8	899	904.8	913.4	921.9	920	924.1	935.5	935.6	923.5	915.5	929.7	920.4	963.6	0.000125104	1.68995e-06	0.000123414	73.0283	18.6349
raca	CZ	2013	0.96	974.6	632.8	1875	937.5	1132.8	1382.8	647.8	715	765.4	826.6	862.1	895.5	913.3	941.1	970.3	973.7	979.2	975.6	968.8	968.2	973.8	1183.1	976.2	971.9	1204.9	973.8	7.88249e-05	4.81385e-07	7.83436e-05	162.746	22.1151
raca	CZ	2013	0.912	1229.3	539.1	1851.6	976.6	1156.3	1273.4	746.6	810.9	873.8	900.8	922.7	560.7	600.8	987.6	576.6	566.7	568	624.8	979.9	610.1	995.8	613.4	1230.2	1225.5	1236	1272.3	0.000123046	1.23463e-06	0.000121811	98.6624	19.9415
raca	CZ	2013	0.896	1008.7	812.5	1914.1	1000	1148.4	1281.3	815.8	849.1	898.8	935.8	953.9	970.7	975.9	992.3	1004.8	1010.3	1006.7	1015.8	1015.1	1009.1	1011	1028	998.1	1015.5	1237.7	1273.3	0.000373196	1.8896e-06	0.000371307	196.5	22.9336
raca	CZ	2013	0.976	982.8	781.3	1921.9	984.4	1164.1	1562.5	762.1	824.9	876.8	909.4	929.5	953.9	967.2	976.9	985.5	984.8	983.7	984.2	988.6	1145.6	984	981.3	986	986.6	989.8	989.3	0.00028117	2.95209e-07	0.000280874	951.443	29.7838
raca	CZ	2013	0.928	994.4	742.2	1921.9	984.4	1171.9	1492.2	739.9	800.2	870.2	903.3	934.7	950	965	974	979.9	988.6	999.2	1001.1	998.6	998.4	986.5	990.1	1002.6	999.2	1000	1274.6	0.000335959	6.39764e-07	0.000335319	524.129	27.1944
raca	CZ	2013	0.848	1015.8	828.1	1859.4	1007.8	1101.6	1234.4	843.1	897.5	933.3	961.7	979.7	990.5	1003.8	1003.7	1023.5	1052.8	1034.5	1020.2	995.3	1018	1018.6	1029.4	1130.3	1228.4	1233.8	1281.7	0.000262889	1.57251e-07	0.000262732	1670.78	32.2292
raca	CZ	2013	0.888	1010.5	773.4	1851.6	1000	1117.2	1242.2	773.6	841	896.5	928.5	966.7	982.8	988.5	997.5	1007.6	1036.3	1038.1	1028.5	982.5	1005.9	1206.2	1032.5	1033.1	1238.6	1238	1266.7	0.00026599	3.46421e-07	0.000265643	766.82	28.8469
raca	CZ	2013	0.912	1006.2	757.8	1906.3	1000	1132.8	1281.3	758.3	835.5	884.4	916.3	939.7	963.5	978.1	988.7	1004.3	1020.6	1009.5	1116.9	1025.9	989.6	1015.8	1018.9	1004.5	1029.4	1243.5	1265.1	0.000233461	2.31713e-07	0.000233229	1006.54	30.0283
raca	CZ	2013	0.968	989.3	734.4	1906.3	992.2	1164.1	1343.8	719	776	841.9	894.5	917.4	945.4	965.3	976.3	988.1	991.7	1006.9	962.6	973.9	1200.1	993.2	992.7	984.1	1225.3	1237.4	1021.7	0.000194725	3.37568e-07	0.000194388	575.848	27.6031
raca	CZ	2013	0.896	1012.6	789.1	1914.1	1000	1171.9	1343.8	726.9	822.4	890.5	920.4	943.6	961.1	970.3	984.1	993.4	1000.7	1007.1	1011.8	1016.4	1019.7	1011.9	1006.9	1013.4	1022.2	1018.9	1307.7	0.000400435	1.6262e-07	0.000400272	2461.4	33.9118
raca	CZ	2013	0.912	998.6	828.1	1921.9	984.4	1156.3	1335.9	818.8	888.1	929.4	947.6	960.6	966.5	976.2	986.3	992.8	999.9	1003.5	1006.7	1009.2	998.2	994.9	993.6	1016.6	1001.9	1010.3	1288.5	0.000461195	4.21494e-07	0.000460774	1093.19	30.387
radk	CZ	2014	0.608	1061	960.9	1796.9	1015.6	1070.3	1570.3	632.2	1056.9	1049.6	1043	1046.1	1040.9	1043.5	1050.9	1058.2	1067.9	1065.4	1069.5	1065.7	1063.5	1065.1	1061.8	1040.2	1006.6	988.3	992.7	0.000292646	1.9887e-06	0.000290657	146.154	21.6481
radk	CZ	2014	0.616	1035.8	554.7	1820.3	929.7	1054.7	1484.4	1585.9	1033	1055.7	1047.7	1030.3	1030.2	1029.5	1043.8	1045.7	1052.2	1059.5	1057.4	632.5	660.9	736.8	1022.1	1039.4	1025.5	991.1	1006.1	0.000244505	1.2177e-06	0.000243288	199.793	23.0058
radk	CZ	2014	0.616	1052.4	960.9	1820.3	1031.3	1085.9	1531.3	1600.8	563.9	528.6	522.4	528	528.3	529.1	1059.8	1061.9	1069.3	1075.4	1079.1	1079.3	1077.8	1076.3	1061.8	1026.7	1018	984.4	1007.7	0.000152228	1.92007e-07	0.000152036	791.826	28.9863
radk	CZ	2014	0.584	1071.5	984.4	1796.9	1046.9	1101.6	1445.3	1670.7	539.4	531.7	536.7	528.9	530.1	536.2	540.8	541	1081	1089.9	1091	1092.6	1089.9	1078.8	1055.4	1060.2	1046.5	1019.7	1041.6	0.000234607	8.74738e-08	0.00023452	2681.03	34.283
radk	CZ	2014	0.584	1095.1	960.9	1781.3	1031.3	1093.8	1281.3	625.4	562.9	535.9	1015	542.7	1107.8	1105.9	1101.3	1101.2	1096.6	1088.6	1087.3	1083.4	1091.4	1094.9	1087.6	1044.9	1016.1	986.6	521.5	0.000256309	2.34207e-07	0.000256075	1093.37	30.3877
radk	CZ	2014	0.544	1096.5	968.8	1171.9	1054.7	1101.6	1140.6	1094.1	1117.9	1112.1	1110.6	1099.7	1095.4	1091.3	1089.9	1098.4	1102.6	1101.7	1100.1	1094.8	1090	1088.5	1085.8	1051.9	1044	1032.3	978.8	0.000221885	1.21904e-07	0.000221763	1819.16	32.5987	-20
radk	CZ	2014	0.488	1096.7	531.3	1164.1	1007.8	1101.6	1179.7	611.2	1104.8	1018.4	544.3	543.1	546.5	545.7	542.1	537	540.8	538.9	550.4	1098.9	1101.9	1092.8	537.3	544	1092.9	1088.6	1050.2	1.57756e-05	8.30868e-08	1.56925e-05	188.869	22.7616	-10
radk	CZ	2014	0.544	1094.5	554.7	1164.1	1046.9	1101.6	1132.8	549.8	554.1	560.2	1115.6	551.2	544.2	1090	1105	1105	1103.1	1100.3	1092.7	1088.6	1088.6	1089.1	1087	1079.4	1045.8	1017	978	7.67006e-05	1.55221e-07	7.65454e-05	493.137	26.9297	-20
radk	CZ	2014	0.544	1122.7	953.1	1179.7	1062.5	1109.4	1156.3	1098.2	1123.5	1139.3	1143.6	1133	1120.6	1109	1109.2	1112.4	1108.6	1102.4	1100	1099.3	1094.9	1088.2	1067.6	1057.4	1066.6	1009.6	990.1	0.000371452	1.38062e-07	0.000371314	2689.47	34.2967
radk	CZ	2014	0.576	1131.3	570.3	1843.8	1062.5	1132.8	1445.3	1085.6	558.5	568.2	1131.7	563.2	1120.1	1119.4	1110.3	1104.6	1099.9	1099.3	1101.3	1095.5	1075.1	1076.1	1080.7	1075.8	1030.3	991.6	540.3	8.629e-05	1.39954e-07	8.615e-05	615.557	27.8927
radk	CZ	2014	0.576	1125.4	531.3	1914.1	929.7	1132.8	1484.4	607.4	584.4	571.1	570.1	570.2	568.9	567.8	563.3	557.1	558.1	557.6	556.9	547.2	543.4	540.7	1084.1	1084	984.9	1080.4	567.9	1.77929e-05	9.81132e-08	1.76948e-05	180.351	22.5612
radk	CZ	2014	0.56	1124.6	992.2	1750	1078.1	1132.8	1382.8	1129.7	552.1	1138.7	1142.5	1139.8	1128.7	1122.8	1120.9	1115	1102.5	1105.8	1103.7	1103.4	1100.1	1074.6	1062.9	1073.7	1038.3	1010.8	1001.5	0.000207913	1.51228e-05	0.00019279	12.7484	11.0545
radk	CZ	2014	0.56	1123.1	937.5	1812.5	1046.9	1117.2	1242.2	1576.5	557.1	577.7	1155.6	1151.2	1138	1135.6	1127.2	1116.5	1115.8	1114.9	1111.5	1099.6	1093.8	1089.8	1090.2	1088.1	1041.9	978.3	986.3	0.000149543	1.02564e-07	0.00014944	1457.05	31.6348
radk	CZ	2014	0.52	1126.1	976.6	1718.8	1078.1	1132.8	1187.5	1101.5	567.3	1159.6	1164.9	1159.2	1146.5	1140	1130.7	1122	1117.2	1118.5	1119.4	1112.6	1093.1	1087.4	1086.2	1071.7	1025.1	1007.2	990.1	0.000132897	1.19186e-07	0.000132778	1114.04	30.469
radk	CZ	2014	0.552	1128.8	984.4	1789.1	1085.9	1140.6	1210.9	1086.4	562.6	1167	1168.4	1158.7	1147.1	1141.4	1134.2	1123.1	1115.9	1117.3	1116.9	1109.3	1088.5	1075.8	1069.6	1056.6	1017.9	998.5	998	0.000174156	1.4623e-07	0.00017401	1189.97	30.7554
radk	CZ	2014	0.512	1135.2	1007.8	1757.8	1085.9	1140.6	1226.6	1104.7	1139.8	1163.4	1155.6	1147.8	1142.1	1133.5	1132.8	1126.8	1120.4	1118.3	1113.2	1112.9	1108.3	1098.6	1091.1	1071.2	1063.8	1053.6	1064.3	0.000116868	1.07945e-07	0.00011676	1081.66	30.3409
radk	CZ	2014	0.52	1043.4	859.4	1148.4	1000	1054.7	1093.8	793.8	894.2	1034.3	1055	1042	1033.9	1043.6	1056.8	1064.2	1061.8	1066.8	1072	1077.3	1067.3	1047.4	1031.9	1038.6	1049.2	1029	956.3	0.000404181	1.05625e-07	0.000404076	3825.56	35.8269
radk	CZ	2014	0.552	1111	921.9	1210.9	1015.6	1093.8	1148.4	1446.7	1145.3	587.7	590.7	1173.4	1164.5	1155.7	1139.6	1133.6	1132.6	1128.1	1118.5	1100.7	1096.2	1100.8	1083.7	1028.5	998.6	956.4	968.1	0.000253851	1.11123e-07	0.00025374	2283.4	33.5858
radk	CZ	2014	0.544	1102.1	937.5	1187.5	1023.4	1070.3	1125	1122.8	1144.8	1127.2	1111.4	1099.7	1092.3	1091.9	1078.9	1081.6	1087	1075.7	1069.8	1081	1085.8	1075.4	1043.3	1013.3	1014	998	955.6	0.000627929	1.54285e-07	0.000627775	4068.93	36.0948
radk	CZ	2014	0.52	1132.7	921.9	1203.1	1023.4	1101.6	1148.4	1104.3	1136.3	1153.8	1160	1151.8	1142.6	1137.8	1129.9	1120.9	1117.4	1116.6	1113.5	1099.1	1086.1	1078.4	1074.9	1052.6	1006.9	963.7	943.7	0.000596944	1.49124e-07	0.000596794	4002	36.0228
skua	CZ	2013	0.648	1153.6	593.8	1835.9	890.6	1140.6	1484.4	711.1	727.4	750.9	772.6	809.1	834.5	840.4	853.2	863.5	875.5	884.2	891.7	1037	883	1107.9	1111.6	1088.8	1114.3	1152.4	1122.3	2.73006e-05	4.54707e-07	2.68459e-05	59.04	17.7115
skua	CZ	2013	0.672	1147.3	609.4	1859.4	906.3	1132.8	1523.4	710.3	724.2	748.3	763.3	856.1	806.5	826.9	842.6	853.8	869.2	885.5	897.5	902.7	914.2	827.6	1075.6	539.9	561	1142.8	1185.1	3.9331e-05	8.47671e-07	3.84833e-05	45.3989	16.5705
skua	CZ	2013	0.648	1143.8	710.9	1859.4	914.1	1140.6	1515.6	723.2	736.7	754.3	774.6	807.9	824.7	846.2	856.4	876.6	884.1	890.3	902.3	911.7	918.9	906.2	902.1	1120.4	1131.7	1151.2	1173.8	4.29514e-05	8.96648e-07	4.20547e-05	46.9021	16.7119
skua	CZ	2013	0.624	1145.9	554.7	1882.8	914.1	1093.8	1484.4	744	745.3	756.6	776	807.2	824.3	838.6	852.7	866.7	883.1	899.2	906.4	918.6	930.4	567.9	567.5	923.4	921.4	1143	1172.9	4.1103e-05	1.94061e-07	4.0909e-05	210.805	23.2388
skua	CZ	2013	0.728	884	523.4	1859.4	875	1078.1	1500	623.4	622.6	583.7	727.5	747.6	761	803.6	819.9	835.7	858.2	877	885.3	894.9	901.5	916	931.2	906.2	908.3	925.2	1143.1	3.32975e-05	1.83808e-06	3.14594e-05	17.1154	12.3339
skua	CZ	2013	0.592	885.3	710.9	1890.6	914.1	1109.4	1515.6	730.9	756.5	761.6	787	815.2	829.3	846.9	873.5	880.4	891.4	895.8	893.8	899.8	913.4	920.7	926.8	934.2	951.7	937.4	924.2	3.20965e-05	1.50447e-07	3.1946e-05	212.341	23.2703	-18
skua	CZ	2013	0.624	1145.2	554.7	1882.8	898.4	1093.8	1242.2	755.8	759.8	765.5	806.7	823.8	842.6	860.9	878.7	891.8	902.6	913	915.5	925.6	928.5	933.7	1045.8	926.8	671.6	706.7	700.3	5.76987e-05	2.12582e-07	5.74861e-05	270.419	24.3204	-10
skua	CZ	2013	0.536	1153.6	796.9	1875	914.1	1117.2	1226.6	807.8	819.9	839.6	850.7	862.4	877.9	890.6	895.3	902.8	912	923.3	928.9	927.6	925.3	939.4	945.3	967.1	1152.2	935.1	946.9	4.60875e-05	2.03498e-07	4.5884e-05	225.476	23.531	-10
skua	CZ	2013	0.568	1152.3	796.9	1875	921.9	1140.6	1218.8	805	816.1	840.1	855.8	860.8	882.4	891	900.2	906.5	918	924.4	931.1	934.2	945.1	1128.8	927.6	1145	1151	1157.9	1181.1	6.21104e-05	5.85072e-07	6.15253e-05	105.159	20.2184
skua	CZ	2013	0.6	1150.8	742.2	1859.4	906.3	1125	1203.1	745.4	758.5	769.1	798.5	821.9	836.5	858	883.7	896.7	900	907.2	914.6	922.5	561.2	551.2	552.2	918.1	1131.8	1156.1	1106.8	3.29469e-05	5.6039e-07	3.23865e-05	57.7928	17.6187
skua	CZ	2013	0.544	1167.2	796.9	1859.4	914.1	1140.6	1203.1	807.3	820.9	838.7	849.8	872.7	883	891.8	908.2	913.4	918.6	926	932.6	933.7	932.6	957	1136.6	1152.4	1157.9	1172.5	1195.6	4.21748e-05	2.81358e-07	4.18934e-05	148.897	21.7289
skua	CZ	2013	0.608	900.9	726.6	1882.8	898.4	1109.4	1304.7	748.1	769.3	779.4	791.2	824.4	840.1	850.8	871.5	890.4	904.4	912.2	922.2	920.6	924	928.2	923	921.5	921.3	1155.3	1184.2	5.00645e-05	4.51231e-07	4.96133e-05	109.951	20.412
skua	CZ	2013	0.512	1150.8	796.9	1859.4	929.7	1062.5	1171.9	807.9	823.2	836.6	866.9	882.1	892.2	900.8	907.1	916.2	932.1	946.4	956.7	980.7	1031.7	927.1	947.8	1136.1	1154.9	1166.2	1179.3	4.56697e-05	1.87996e-07	4.54817e-05	241.929	23.8369
skua	CZ	2013	0.656	896.7	523.4	1859.4	859.4	945.3	1187.5	606.1	681.1	742.9	770.1	605.3	819	837	862.6	879.5	897.2	664.4	920.2	930.5	613	933.6	937.1	934.5	940.4	668.6	1184	1.34393e-05	1.22818e-06	1.22111e-05	9.94243	9.97492
skua	CZ	2013	0.536	1146.8	796.9	1890.6	914.1	1132.8	1343.8	803.7	818.6	835.2	849.8	872.5	879	892.6	903.5	909.2	915.7	925.8	929.4	944.6	943.6	947.4	954.5	933	1148.4	1147.3	949.8	5.65615e-05	2.38543e-07	5.63229e-05	236.112	23.7312
skua	CZ	2013	0.528	1159.8	601.6	1890.6	929.7	1117.2	1203.1	811	813.5	829.3	845.1	877.6	896.9	911.5	921.3	925.6	926.8	946.7	952.6	956.6	956.8	957.4	600.4	596.4	1135.8	1158	590.5	3.4839e-05	8.09916e-07	3.40291e-05	42.0156	16.2341
skua	CZ	2013	0.528	1154.5	578.1	1898.4	921.9	1062.5	1195.3	753.6	825.9	822.7	840.9	860.7	883.2	888.3	910.6	918	595.4	594.8	944.8	948.8	956.3	961.9	597.4	589.9	960.9	1153.2	973.3	2.51949e-05	4.92011e-07	2.47028e-05	50.2079	17.0077
skua	CZ	2013	0.52	1147.2	625	1898.4	898.4	1132.8	1570.3	801.2	818.3	837.7	860.9	870.2	879.2	894.4	897	903.6	912.1	916.8	918.7	929.9	905.4	934.7	936.4	949.6	938.6	933.8	584.2	3.13026e-05	1.56089e-06	2.97417e-05	19.0543	12.7999
skua	CZ	2013	0.536	963.2	562.5	1906.3	906.3	1007.8	1195.3	825.1	835	834	848.8	872.3	887.8	910.9	916	916.3	940.2	945.9	945.5	950.7	574.9	955.1	962.5	968.4	968.5	984.4	974.6	3.24025e-05	3.79702e-07	3.20228e-05	84.3366	19.2602
skua	CZ	2013	0.584	1145.2	796.9	1882.8	914.1	1078.1	1195.3	809.3	805.7	821.8	844.6	877.8	888.9	906.9	912.2	921.1	926.4	929.8	952.4	952.2	949.8	956.5	670.3	1035	952.5	1146.9	584	3.59722e-05	4.65653e-07	3.55065e-05	76.2511	18.8225
skua	CZ	2013	0.568	1145.3	796.9	1882.8	914.1	1117.2	1210.9	818.9	813.8	815.5	837.6	862.9	884.5	896	906.3	909	918.2	928.6	941.1	943.2	947.8	949.8	951.7	972.3	1138.9	1144.4	951.2	3.41589e-05	2.28437e-07	3.39305e-05	148.534	21.7182
skua	CZ	2013	0.568	1136.1	804.7	1906.3	906.3	1039.1	1203.1	819	827.1	820.5	833.1	865.6	883	898.7	911.5	921.9	929.5	867.6	940.5	950.2	954.2	959.5	953.2	954.9	987.3	1132.9	968.5	2.82134e-05	1.51821e-07	2.80616e-05	184.833	22.6678
susa	CZ	2013	0.552	1102.3	820.3	1250	976.6	1062.5	1132.8	840.9	848.3	894.3	912.4	945.3	988.6	1029.5	1041.2	1055.6	1067.2	1093.6	1096.6	1107.9	1124.7	1121	1125.5	1133.3	1130	1143.8	1183.1	5.43392e-06	3.20958e-07	5.11296e-06	15.9303	12.0222
susa	CZ	2013	0.536	1069.1	710.9	1257.8	968.8	1062.5	1140.6	807.9	864.2	895.9	935.3	969.9	1001.7	1030.9	1049.3	1057.3	1069.8	1079.8	1091.9	1103.8	1112.4	1114.4	1123.1	1123.7	1120.7	1127.5	1140.8	1.68628e-05	5.11855e-07	1.63509e-05	31.9445	15.044
susa	CZ	2013	0.536	1102	812.5	1218.8	968.8	1054.7	1117.2	825.1	837.3	884.4	919.9	960.6	991.9	1029.1	1046.8	1066.3	1079.6	1091.5	1098.9	1110.6	1113.2	1111.5	1113.8	1117.7	1111.7	1120.8	1035.8	1.25982e-05	4.784e-07	1.21198e-05	25.334	14.037
susa	CZ	2013	0.544	1047.1	820.3	1203.1	960.9	1039.1	1093.8	839.9	848.3	728.2	924.5	968.2	724.9	1021.4	959.8	1053.8	1072.5	1084.7	1087.5	1077.2	730.6	1044.6	1045.9	1057.1	1050.7	1043.6	1084.6	6.59096e-06	5.58765e-07	6.03219e-06	10.7956	10.3325
susa	CZ	2013	0.56	1070.3	734.4	1804.7	945.3	1031.3	1125	750.3	768.7	835.1	872.3	887.3	893.7	942.2	967.7	1003.2	1036	1035.9	1047.8	1055.3	1051.8	1053.6	1067.9	1072.9	1070.5	1078.7	1084.1	1.9191e-05	6.98589e-07	1.84924e-05	26.4711	14.2277
susa	CZ	2013	0.56	1046.7	773.4	1203.1	921.9	1031.3	1109.4	810.3	828.9	862.6	886	897.6	933.9	978.3	1033.5	1028.1	1041.4	1051	721	1026.5	1085.2	1084.1	1086.4	1080.6	1082.5	1104	1124.7	5.27782e-06	6.32373e-07	4.64545e-06	7.34606	8.66054	-15
susa	CZ	2013	0.544	1099.3	820.3	1257.8	984.4	1054.7	1117.2	838.4	834.6	876.4	892.8	920.5	953.7	980.5	1001.4	1021.9	1034.2	1044.1	1055.7	1058.8	1077.1	1093.4	1098.9	1105.8	1105	1108.1	1175.7	2.23504e-05	6.09548e-07	2.17409e-05	35.6672	15.5227	-10
susa	CZ	2013	0.536	1046.9	851.6	1210.9	976.6	1039.1	1078.1	867.6	746.9	919.9	954.6	974.2	991.1	781.5	1000.4	779.4	1024.3	1042	1044	1055.1	1066.7	718.6	1022.7	992	740.5	1088	1108.9	7.3679e-06	2.36672e-07	7.13123e-06	30.1312	14.7902	-15
susa	CZ	2013	0.576	1083.7	773.4	1257.8	953.1	1046.9	1117.2	732.5	811.6	843	753.8	907.5	936.8	963.2	997.5	1010.2	1047.2	1059.8	1074.5	1071.1	1077.8	1089	1095.3	1108.3	1119.2	1124.5	1138.4	1.36381e-05	8.13918e-07	1.28242e-05	15.7561	11.9745
susa	CZ	2013	0.584	1055.6	765.6	1250	953.1	1046.9	1117.2	778.3	788	796.3	859.8	901.2	927.8	978	924.8	1024.6	1051.5	1069.7	1028.6	1090.2	1099.1	1103.3	1110.5	1105.6	1115.3	1134.1	1109.8	1.20139e-05	6.03533e-07	1.14104e-05	18.906	12.766
susa	CZ	2013	0.592	1045.3	804.7	1234.4	960.9	1046.9	1117.2	819.9	837.7	878.8	913.4	950	972.2	1005.6	1017.8	1033	1052.9	1073.2	1090.3	1098.6	1099	1106	1113.7	734.9	1122.1	1120.4	1163.3	1.3702e-05	9.49646e-07	1.27524e-05	13.4285	11.2803
susa	CZ	2013	0.536	1124.6	812.5	1226.6	968.8	1062.5	1132.8	839.6	870.4	890.6	919.6	980.5	1014.3	1047.8	1062	1086.7	1101.9	1093.1	1115.2	1119	1122.2	1133.7	1137.6	1148.3	1142.1	1136.4	1157.3	1.46665e-05	6.14647e-07	1.40518e-05	22.8616	13.5911
susa	CZ	2013	0.624	1041.1	820.3	1195.3	945.3	1046.9	1117.2	781.7	850	716.9	712.6	859	727.1	1027.4	1045.9	1069	1086.2	1100.7	1106.9	1117	1118.1	724.7	1114.9	738	1111.9	1090.3	1115.2	6.70057e-06	1.3241e-06	5.37647e-06	4.06046	6.08576
susa	CZ	2013	0.592	1047.9	750	1218.8	929.7	1023.4	1109.4	795.3	809.5	843.1	870.5	903.4	919.6	950.3	995.5	914.7	757.3	1041.2	1057	715.1	1082.7	750	1099.1	1101.3	722.1	1114.5	1093.5	6.68774e-06	1.14243e-06	5.54531e-06	4.85397	6.86097
susa	CZ	2013	0.608	1083.3	718.8	1242.2	914.1	1023.4	1101.6	763	775.3	828.4	715	882.7	759.1	743.2	786.7	916.4	1013.2	1029.8	1044.7	715.8	903.8	727.3	1075.6	775.6	1084.9	1097.2	1083.2	3.8155e-06	8.07008e-07	3.0085e-06	3.72796	5.71471
susa	CZ	2013	0.592	1086.9	781.3	1234.4	937.5	1039.1	1117.2	806.5	835.8	837.9	880.4	918.2	964.9	1020.2	1044.4	1067.3	725.9	732.3	1090.6	1091.3	1099.5	1106.9	1115.4	1120.9	714	1120.3	945.7	6.80964e-06	1.00073e-06	5.80891e-06	5.80468	7.63778
susa	CZ	2013	0.64	1033.4	703.1	1218.8	914.1	1023.4	1101.6	707	793.6	824.5	853	878.4	923.4	729.5	744.2	926.9	1021.8	747.3	751.7	767.2	794.4	962.8	1080.6	717.6	716.6	1079.3	1092.7	3.28882e-06	9.24726e-07	2.3641e-06	2.55654	4.07652
susa	CZ	2013	0.528	1133.9	835.9	1226.6	1000	1070.3	1140.6	848.2	850.5	890.8	925.9	944.2	798.1	988	1008.5	1016.6	993.4	1059.7	1065.1	1070.1	1087.3	1104.9	1112.1	1122.3	1128.2	1138.1	1144.3	4.19009e-05	1.23546e-06	4.06655e-05	32.9154	15.174
susa	CZ	2013	0.608	1056.5	804.7	1203.1	953.1	1039.1	1101.6	842.9	864.5	891.9	928	946.9	991.1	1024.2	1045.8	1054.5	1062.6	1067	1072.3	1083.2	1091.1	1101.2	1102.6	1107.3	1103.2	1098	1124.3	4.00639e-05	3.62186e-06	3.6442e-05	10.0617	10.0267
susa	CZ	2013	0.56	1048.4	828.1	1210.9	968.8	1054.7	1125	848.8	858.5	886	933.7	967.9	1003	1036.9	1048.1	1068.7	1080.8	1095.1	1111.9	1126.2	1134.4	1142.5	716.5	1137.8	1132.9	1126.4	1127.2	2.77997e-05	2.05441e-06	2.57453e-05	12.5317	10.9801
susa	CZ	2013	0.592	1048.3	804.7	1203.1	953.1	1031.3	1093.8	816.3	838.4	884.2	917.1	941.5	963.7	978	991.6	1015.2	1028.3	1039.3	1056.7	1085	1094.8	1096.7	1095.1	1094.2	1092	1089.4	734.4	2.66262e-05	2.36445e-06	2.42618e-05	10.2611	10.1119
susa	CZ	2013	0.56	1045.9	820.3	1195.3	960.9	1046.9	1109.4	834.9	842.2	876	904.4	924.1	946.4	989.6	975.2	1037.1	1046.1	1051.8	1078.8	1087.6	1097.7	1105.4	1114	1116.9	1110.4	1111.2	1121.1	3.17266e-05	1.63791e-06	3.00887e-05	18.3702	12.6411
susa	CZ	2013	0.576	1044.2	812.5	1210.9	968.8	1046.9	1117.2	841.6	869.8	889.7	938.4	979.8	1005.6	1031	1043.2	1048.8	1061.9	1072.9	1085.9	1097.7	1110.7	1115.4	1118.4	1119.2	1115.7	1116.1	1121.8	3.38626e-05	2.20557e-06	3.1657e-05	14.3532	11.5695
susa	CZ	2013	0.576	1047.6	789.1	1218.8	960.9	1046.9	1117.2	818.9	835.1	869.4	887.1	924.6	956.6	972.8	990.6	1015.4	1040.2	1048.3	1076.1	1084.7	1089.7	1099.1	1109.8	1118.3	1115.3	1120.5	1171.9	2.65829e-05	1.65715e-06	2.49258e-05	15.0413	11.7729
susa	CZ	2013	0.56	1049.7	828.1	1218.8	976.6	1054.7	1117.2	851.1	865.4	900.8	931.7	961.4	989.7	1032.6	1045.2	1061.3	1075.5	1080.3	1093.1	1099.5	1110.6	1118.9	1114.7	1114	1110.7	1116.3	726.2	3.26863e-05	1.48562e-06	3.12007e-05	21.0018	13.2226
upoa	CZ	2013	0.76	1011.1	750	1781.3	976.6	1039.1	1578.1	641.1	757.8	764.5	773.3	794.2	829	871.4	976.7	997.7	998.6	1012.9	1018.1	1017.6	1019.2	1017.4	1005	871.3	994.1	1013.9	1010.1	0.000422826	3.16686e-06	0.000419659	132.516	21.2227
upoa	CZ	2013	0.608	1015.3	781.3	1765.6	984.4	1039.1	1585.9	769.9	792.4	786.9	801.4	812.9	835.3	873.5	966.7	988.8	1000	1003.6	1004	1010.4	1018	1018.7	1020.1	1025.5	1016.2	997.8	874.8	0.000405549	1.34573e-06	0.000404203	300.36	24.7764
upoa	CZ	2013	0.592	1047.5	796.9	1757.8	984.4	1046.9	1460.9	791	811.8	828.2	855.6	930.7	937.3	968.8	1001.8	1000.2	1023	1020	1040.6	1046.6	1048.3	1061.6	1060	1060.9	1044.2	1005.3	929.5	0.000754229	3.20106e-06	0.000751028	234.618	23.7036
upoa	CZ	2013	0.592	1064.3	812.5	1781.3	1000	1062.5	1109.4	819.3	828	836.1	867.7	949.7	985.8	990.7	1015.7	1038.1	1038.9	1054.2	1060.8	1070.7	1064.8	1070.8	1086.1	1083.2	1075.8	1005.1	963.8	0.000796575	1.13149e-06	0.000795443	703.004	28.4696
upoa	CZ	2013	0.592	1048.2	828.1	1734.4	992.2	1046.9	1093.8	834.2	848.7	841.6	852	944.7	970.9	998.7	1008.2	1034.7	1031.5	1041.1	1047.3	1051.8	1062.4	1062.1	1064.9	1064.8	1053	1029.4	983.4	0.000826665	2.29744e-06	0.000824367	358.819	25.5488
upoa	CZ	2013	0.728	1024.9	796.9	1812.5	992.2	1046.9	1617.2	586.4	794.4	815.5	818.8	834.5	878.4	978.9	997.2	1002.9	1015.5	1024	1026.9	1029.5	1032.3	1033.7	1005.8	1020.2	1025.7	1031.1	1028.1	0.000447724	1.01324e-07	0.000447622	4417.71	36.452	-20
upoa	CZ	2013	0.568	1028.6	812.5	1804.7	984.4	1031.3	1578.1	804.1	823.9	839.8	837.4	855.6	890.8	961.1	982.3	985.5	997.5	1013.8	1019.6	1026.7	1028.3	1026.2	1032	1033.7	1035.6	1005.7	951.7	0.000685548	1.19014e-07	0.000685429	5759.21	37.6036	-10
upoa	CZ	2013	0.552	1038.8	828.1	1781.3	992.2	1039.1	1515.6	827.5	844.6	845.8	856.7	884.5	991	999.9	1003.3	1012.9	1019.9	1027.9	1028.4	1032.8	1037.9	1038.1	1045.2	1044.2	1044.6	1014.5	951.7	0.000864475	3.51061e-07	0.000864123	2461.47	33.9119	-20
upoa	CZ	2013	0.584	1030.6	835.9	1796.9	984.4	1039.1	1570.3	832.1	855	844.2	889.9	943	958.9	976.1	984.2	1008.4	1011.1	1025.1	1034	1033.5	1033.5	1038.8	1037.5	1033.9	1036.5	1007.4	950.4	0.000826611	2.69823e-07	0.000826342	3062.53	34.8608
upoa	CZ	2013	0.64	1030.6	828.1	1851.6	992.2	1054.7	1664.1	1499.9	837.8	842.5	839.5	859.6	911.1	979.7	996.2	1006.8	1015.9	1025.4	1031	1035.8	1032.1	1035.8	1036.7	1033.5	995.7	933.4	1015.9	0.000460741	4.25695e-07	0.000460315	1081.33	30.3396
upoa	CZ	2013	0.624	1037.6	820.3	1820.3	1000	1054.7	1656.3	1496.2	831.2	855.2	867.7	949.7	983.8	1003.6	1021.5	1029.4	1025.3	1032.3	1036.7	1037.2	1037.5	1039.1	1043	1036.7	994.2	928.7	1015.1	0.000581298	3.20243e-07	0.000580978	1814.18	32.5868
upoa	CZ	2013	0.592	1028.7	820.3	1781.3	984.4	1031.3	1570.3	807.4	837.3	842.4	860.6	884.8	963.8	985.9	989.5	996.7	1004	1008.1	1019.2	1024.3	1028.9	1033.1	1035.8	1033.1	1026.9	991.6	1029.3	0.000775031	7.68948e-07	0.000774262	1006.91	30.0299
upoa	CZ	2013	0.576	1023.9	859.4	1796.9	976.6	1031.3	1421.9	847.8	880	877.6	887.9	951.1	952.5	975.3	996.8	1006.1	1012.7	1015.1	1023.5	1027.8	1032.4	1036.9	1036	1037.3	1026.3	996.3	917.4	0.000877707	9.93959e-07	0.000876713	882.042	29.4549
upoa	CZ	2013	0.52	1052.6	765.6	1781.3	992.2	1054.7	1531.3	744.6	772.8	786.9	781	839.7	865	976.9	995.7	1012.9	1021.7	1036.9	1048.7	1048.8	1053.5	1057.7	1057.1	1034.7	1017.7	996.4	939.3	0.000705039	1.26046e-07	0.000704913	5592.52	37.4761
upoa	CZ	2013	0.488	1063.3	835.9	1796.9	1007.8	1070.3	1117.2	841.8	877.2	1027.4	1035.2	1046.5	1065.9	1069.3	1083.3	1074.4	1083.5	1090.5	1089	1079.7	1079.5	1076.4	1050.7	1058.3	1045.7	998.3	950.6	0.000820786	4.35451e-07	0.000820351	1883.91	32.7506
upoa	CZ	2013	0.592	1054.2	843.8	1804.7	1007.8	1062.5	1523.4	1498.5	842.2	858.9	863.4	978.1	997.4	1007.2	1022.4	1031.3	1037.5	1043	1047.5	1049.6	1049.6	1054.9	1052.6	1061.1	1036.9	953.9	1041	0.00113798	1.21274e-07	0.00113786	9382.55	39.7232
upoa	CZ	2013	0.728	1001.8	757.8	1820.3	976.6	1031.3	1601.6	588.9	755.4	766.2	785.6	815.9	855.1	876.3	962.8	987.5	983.9	995.5	1002.1	1007.5	1006.3	1005.1	1001	885.8	958.2	923.1	1002	0.000524038	5.07261e-07	0.00052353	1032.07	30.1371
upoa	CZ	2013	0.544	1025.2	812.5	1812.5	992.2	1039.1	1648.4	814.7	828.4	834.2	845.4	886.1	980.7	995.4	1001.3	1010.8	1027.5	1035.9	1033.6	1028	1012.4	1015.6	1016.1	1027.6	1026.7	1002.9	934.2	0.000864789	3.90755e-07	0.000864399	2212.12	33.4481
upoa	CZ	2013	0.712	1021.8	835.9	1820.3	992.2	1046.9	1640.6	1483.1	842.4	862.3	876.8	957.2	987.4	999.9	1002.1	1005	1015.7	1024.3	1024.7	1029.1	1027.8	1032	1005.4	942.9	1029.9	1028.6	1029.9	0.000840656	1.38062e-07	0.000840518	6087.96	37.8447
upoa	CZ	2013	0.536	1040.4	859.4	1804.7	1000	1046.9	1539.1	847.4	875.5	883	884.2	982.1	987.1	995.8	1008.5	1015.2	1024	1023.3	1029.7	1031.3	1033.5	1036.4	1043.2	1046.5	1047.6	1006.9	1027.7	0.000918622	7.73433e-08	0.000918545	11876.2	40.7468
upoa	CZ	2013	0.52	1045.8	835.9	1843.8	992.2	1039.1	1187.5	846.6	869.4	902.5	960.1	976.6	996.8	1008	1019.3	1021.9	1024	1027	1037.1	1045.6	1052	1054.9	1051.8	1040.1	1040	1018.6	968.9	0.000816507	7.94071e-07	0.000815713	1027.25	30.1168
upoa	CZ	2013	0.512	1034.4	929.7	1085.9	1000	1039.1	1070.3	954.1	976.6	982.2	992.4	991	1002.7	1012.6	1024.7	1025.9	1033.4	1035.3	1039.5	1038	1044.7	1037	1039.1	1038.4	1035.3	1014.4	964.2	0.000970067	6.31968e-08	0.000970004	15348.9	41.8608
upoa	CZ	2013	0.552	1033.2	882.8	1796.9	992.2	1039.1	1500	843.6	883.4	949.4	957.7	971.3	990.9	1001.6	1016.3	1023.4	1027.6	1034.2	1037.1	1037.1	1040.4	1041	1041	1034.4	1034.2	1005.7	874.9	0.000839649	8.35943e-08	0.000839565	10043.3	40.0188
upoa	CZ	2013	0.704	1031.1	882.8	1820.3	984.4	1039.1	1468.8	1475	870.9	936.2	894.7	964.5	986.6	997.1	1010.6	1021.3	1023.9	1023	1034	1038.4	1033.6	1030.4	999.6	1028.2	1037.7	1029.6	1030.5	0.000804096	6.43421e-08	0.000804032	12496.2	40.9678
upoa	CZ	2013	0.56	1030.3	867.2	1820.3	984.4	1039.1	1578.1	832.9	872.6	894.7	895.1	949.9	981.1	991.8	1000.2	1006.1	1017.1	1020.8	1022	1021.9	1024	1035.7	1038.2	1035.4	1032.1	1007.1	956.9	0.000780864	1.08184e-07	0.000780756	7216.89	38.5835
upoa	CZ	2013	0.536	1037.1	882.8	1804.7	1000	1046.9	1468.8	857.2	887	959.2	969.4	982.1	996.1	1008.3	1013.8	1025.1	1032.3	1036.7	1035.5	1045.9	1044.2	1044.7	1041.8	1046.1	1043.5	1012	953.3	0.000928491	1.39996e-07	0.000928351	6631.28	38.216
upoa	CZ	2013	0.624	1003.2	812.5	1750	968.8	1023.4	1500	709	738.7	742.8	764.5	799.8	769.2	865.4	917.4	943.9	956.3	975.1	982.6	988	1003.5	1009.3	1013.5	1003.1	1002	973.7	1005.7	0.000664844	3.52604e-06	0.000661318	187.553	22.7312
upoa	CZ	2013	0.608	1011	789.1	1843.8	976.6	1031.3	1554.7	731.1	771.4	776.5	800.5	824.7	854.8	848.5	927.9	962.5	978.3	978	986.5	997.8	1004.2	1009.3	1013.5	1022.9	1012.2	991	1010.5	0.000783911	1.66637e-06	0.000782245	469.429	26.7157
upoa	CZ	2013	0.568	1023	835.9	1796.9	976.6	1023.4	1062.5	770.8	864	869.4	876.4	963.7	978.6	987.5	992.9	1000.1	1005.5	1014	1020.7	1030.2	1036.9	1032.4	1032.4	1033.2	1032.5	999.3	1015.4	0.00104299	1.02831e-07	0.00104288	10141.8	40.0611
upoa	CZ	2013	0.568	1046.7	898.4	1101.6	1000	1039.1	1078.1	975.9	992.8	982.3	988.8	997.4	1014.5	1030.2	1036.7	1043	1052.6	1054.9	1056.3	1052.9	1053.5	1050.9	1045.7	1042.7	1026.5	910.6	1045.2	0.00102844	1.2838e-06	0.00102716	800.092	29.0314
upoa	CZ	2013	0.552	1019.4	921.9	1093.8	1000	1031.3	1070.3	951.9	971.7	963.8	970.7	986.6	999.5	1001.2	1017.4	1031.5	1036.5	1045.5	1049.4	1054.6	1050.2	1048.4	1044.7	1041.1	1039.5	1012.3	899.2	0.00103035	1.33374e-07	0.00103022	7724.31	38.8786
vela	CZ	2013	1.08	1083.1	554.7	1218.8	812.5	1062.5	1140.6	550.3	662.1	704.4	705.3	789.5	818	842.9	864.4	1058.7	860.7	874	1115	1080.4	1067.9	1079.5	1194.1	555.5	1069.1	1137.7	570.1	1.47504e-05	1.54711e-07	1.45957e-05	94.3414	19.747
vela	CZ	2013	0.824	891.2	765.6	1851.6	890.6	1007.8	1164.1	775.5	778.1	783.9	815.6	841.2	853.6	858.7	865.2	869	879	888.6	890.9	896.5	899.4	901.5	919.2	1114.8	909.5	899.4	899.8	0.000231497	1.52444e-07	0.000231344	1517.57	31.8115
vela	CZ	2013	0.784	900.9	742.2	1843.8	875	960.9	1445.3	788	762.7	778.6	807.7	837.3	844.7	853.2	860.3	863.9	869.4	877.1	882.5	887	896.4	899.6	907	1105.1	892.6	899	903.9	0.000206054	1.43521e-07	0.00020591	1434.7	31.5676
vela	CZ	2013	0.808	1078.6	750	1796.9	882.8	1062.5	1156.3	764.4	762.2	773	790.7	820.7	840.9	853	853.7	866.7	874.7	881.9	1067.1	1081.8	1086.3	872.9	1111.8	880.5	1150.9	1101	1067.1	0.000209483	5.15499e-07	0.000208968	405.37	26.0785
vela	CZ	2013	0.736	902.4	726.6	1851.6	882.8	1007.8	1500	756.2	742.3	759.3	797.6	829	846.8	856.8	861.3	873.5	886	889.3	890.1	896	904.3	909.5	919.2	909.1	904.5	1129.2	896.7	0.000229191	1.39342e-07	0.000229051	1643.8	32.1585
vela	CZ	2013	0.776	898	765.6	1851.6	882.8	968.8	1570.3	776	786.2	797.1	819.9	838.2	847.4	853.1	865.1	878.2	882.2	888	894	899.1	901.1	904.5	907.6	913.2	907.2	908.1	901.7	0.00025095	4.95532e-07	0.000250455	505.426	27.0366	-20
vela	CZ	2013	0.76	901.6	789.1	1835.9	890.6	1015.6	1140.6	809.2	805.5	822.3	849.2	860.8	872	880.6	887	893.8	902.1	900.9	901.3	907.8	910.1	915.4	910.7	904.6	908.3	896.9	903.9	0.00031719	1.63602e-07	0.000317026	1937.79	32.8731	-10
vela	CZ	2013	0.808	895.8	742.2	1843.8	890.6	1062.5	1515.6	753.2	759.5	793.4	809.3	838	848.5	858.1	868	874.7	883.3	893.1	1804.2	908.3	909.5	904.5	1132	1144.3	898.8	904.8	888.9	0.000195303	1.46304e-07	0.000195156	1333.91	31.2513	-15
vela	CZ	2013	0.824	902	773.4	1859.4	882.8	984.4	1171.9	796.6	812	819	846.9	859.2	868.1	867.5	872.4	883	886.8	896.6	904.6	911.7	915.2	904.9	899.7	1133.1	899.2	909.6	917.4	0.000314507	1.65988e-07	0.000314341	1893.76	32.7732
vela	CZ	2013	0.832	919.7	781.3	1875	898.4	1007.8	1273.4	539.4	797	796.4	828.7	848.4	863.3	873.2	886.6	894.2	895.1	904.8	911	924	1116.9	1131.5	909.4	907.1	904.6	900.3	1136.1	0.000268877	1.42533e-07	0.000268734	1885.42	32.7541
vela	CZ	2013	0.776	897.7	765.6	1851.6	890.6	1054.7	1195.3	778.1	789	793.3	827.5	848.1	856.5	864.2	867.3	872.6	883.5	893.6	901.2	904.8	905.5	921	910	904.3	906.3	899.7	906.4	0.000276047	1.76649e-07	0.00027587	1561.68	31.9359
vela	CZ	2013	0.8	899.6	757.8	1828.1	875	1000	1156.3	551	801.3	781.9	821.1	843.5	862.3	872.5	881.9	880.7	881	888.6	891.8	896	907.7	885.8	1101.9	1116.6	898.4	888.9	1126.7	0.000163869	8.84507e-08	0.000163781	1851.66	32.6756
vela	CZ	2013	0.744	903.8	773.4	1859.4	882.8	953.1	1179.7	799	812.5	793.9	830.9	849.8	859.4	867.1	884.4	883.2	892.9	895.3	903.5	907.3	912.1	917.9	918.1	916.4	921.7	911.9	910.7	0.000228766	1.17545e-07	0.000228649	1945.19	32.8896
vela	CZ	2013	0.72	904.2	781.3	1867.2	882.8	945.3	1148.4	810.8	835.9	818.4	840.1	855.6	875.1	884.8	892.6	891.7	899.2	907.2	912.6	915.3	915.5	920.3	920.5	919.2	1100.8	916.7	911.9	0.000260358	1.2858e-07	0.00026023	2023.87	33.0618
vela	CZ	2013	0.72	902.6	750	1843.8	875	937.5	1398.4	767.5	779.1	770.9	797.5	816.8	836	850.5	849.7	859.4	870	881.7	887.9	891.2	903.6	906.7	921.4	904.2	906.9	898	907.2	0.000141892	1.03001e-07	0.000141789	1376.58	31.388
vela	CZ	2013	0.744	900.9	703.1	1828.1	867.2	937.5	1421.9	715.6	707.3	729.9	763.8	802.7	820.8	838.3	848.3	856	860.8	872.6	877	883.7	887.3	893	899	915	1115.4	897.3	1149.7	0.000169834	1.19215e-07	0.000169714	1423.6	31.5339
vela	CZ	2013	0.752	894.9	773.4	1835.9	882.8	1023.4	1140.6	800	800	804.7	836.4	859	874.2	882.3	887.9	891.4	896.6	902.5	906.4	1071	902.5	903.3	904.2	1099.2	902.3	902.7	1087.1	0.000237074	1.22438e-07	0.000236952	1935.27	32.8674
vela	CZ	2013	0.792	904.6	757.8	1859.4	875	945.3	1195.3	731	808.6	784.3	819.2	841.5	858.6	874.4	878.4	881.5	888	902.5	907.2	914.4	920	902.4	1126.6	910	903.4	920.3	1136.7	0.00019876	1.2805e-07	0.000198632	1551.2	31.9067
vela	CZ	2013	0.744	900.3	781.3	1835.9	890.6	1031.3	1156.3	812.8	819.4	804	826.2	848.6	862.3	866.1	876.1	885	893.8	894.2	896.4	894.2	903.5	918.6	1087.1	1110.7	897.5	1137	899.1	0.000247102	1.146e-07	0.000246988	2155.22	33.3349
vela	CZ	2013	0.792	904.1	757.8	1867.2	875	945.3	1164.1	767.4	789.1	790	820.5	837.9	852.9	870.2	877.2	885.1	896.6	900.2	909.8	915.5	916.7	917.7	919.4	941.8	922.2	1155.2	1116.5	0.00026769	1.43241e-07	0.000267547	1867.81	32.7133
vela	CZ	2013	0.72	899.7	757.8	1859.4	882.8	945.3	1296.9	776.2	772.8	783	808.8	830.6	853.7	864.2	873.4	885.5	898.6	899.6	899.7	909.5	912.1	914.5	917.3	917.2	917.6	903.7	931.8	0.000296386	1.51907e-07	0.000296234	1950.1	32.9006
vela	CZ	2013	0.736	876.8	765.6	1843.8	882.8	1015.6	1132.8	795.2	823.8	796.2	821.2	841.4	856.9	863	869.4	886.3	883.1	894.6	900.1	911.6	1060.3	1085.9	910.7	907.7	1140.7	901.3	913.9	0.000194302	1.3717e-07	0.000194165	1415.5	31.5091
vela	CZ	2013	0.8	901.5	757.8	1851.6	875	937.5	1148.4	577.9	794.2	775.9	816.7	846.9	866.9	876.4	884.5	897.6	909.2	912	916.6	923.4	930	916.6	932.8	1146.8	927.4	929.8	1139.6	0.000142089	1.48657e-07	0.000141941	954.821	29.7992
vela	CZ	2013	0.728	904	726.6	1828.1	867.2	929.7	1132.8	735.5	737.9	765.7	803.6	829.6	846.8	859	869.1	879.8	888.5	898.3	901.5	909.7	914.6	914.9	924.6	918.7	912.5	907	916.5	0.000125105	1.44515e-07	0.000124961	864.694	29.3686
vela	CZ	2013	0.72	896.2	757.8	1828.1	859.4	914.1	1156.3	776	780.9	783	812.2	823.3	842.3	852.2	859.6	865.1	876.5	888.7	888	902.2	902.2	908.8	909.8	909.3	911.6	910.3	934.3	0.000179614	1.20395e-07	0.000179493	1490.88	31.7344
vraa	CZ	2014	0.456	982.7	515.6	1898.4	945.3	1109.4	1648.4	889.3	821.7	829.4	740.4	802.2	797.1	832	781.8	840.6	887.8	898.4	907.9	919.6	925.6	930.2	924.1	953.5	722.9	570.8	1171.1	1.04708e-05	1.74875e-06	8.72206e-06	4.98761	6.97893
vraa	CZ	2014	0.632	1052.9	531.3	1890.6	953.1	1046.9	1171.9	949.8	559.6	578.5	552.2	960.9	507.5	939.2	932.4	938.8	952.8	962.2	536	981.6	992.4	1004	523.3	1026.5	1058.2	575.1	544.6	8.23572e-06	1.49104e-06	6.74469e-06	4.52348	6.55473
vraa	CZ	2014	0.544	1025.2	820.3	1882.8	960.9	1031.3	1210.9	817.7	946.6	925.2	907.6	907.4	921.3	936.4	945.2	955.8	971.4	979.8	990.3	998.6	1000.7	1003.4	1016.2	848.8	1035.2	1055.1	1502.8	3.48336e-05	1.34352e-06	3.349e-05	24.9271	13.9667
vraa	CZ	2014	0.48	1066.3	890.6	1898.4	976.6	1039.1	1101.6	941.8	954.8	928.2	918.9	921.8	934	948.9	958.9	971.5	983.3	984.7	995.2	1003.3	1005.6	1014.9	1014	1018.1	1051.2	1074.2	1057.2	0.000121336	1.15168e-06	0.000120185	104.356	20.1852
vraa	CZ	2014	0.52	1062.8	914.1	1195.3	984.4	1046.9	1101.6	935.5	641.5	949.4	935.5	933.1	940.8	953.7	972.2	981	992.7	996.4	998.6	548.4	1017	1023.5	1023	1045.6	1069.6	1055	1044.1	3.72144e-05	1.5905e-06	3.56239e-05	22.3979	13.5021
vraa	CZ	2014	0.464	1016.9	859.4	1929.7	953.1	1015.6	1156.3	908.8	897.2	875.3	879.2	884.8	892.8	898.5	912.2	930.6	945.8	951.4	959.5	958.5	969.4	976.6	980.2	993	1007.4	1024.7	1035.6	3.51762e-05	1.12939e-06	3.40468e-05	30.1462	14.7923	-15
vraa	CZ	2014	0.472	1022.6	875	1867.2	945.3	1007.8	1062.5	919.1	940.7	924.8	911.4	910.6	913.4	935.4	948.6	571.1	965.1	534.6	515.3	996.9	1004.3	1008.6	1011.4	1023.1	1044.5	1039.8	650	1.53569e-05	9.07194e-07	1.44497e-05	15.9279	12.0216	-10
vraa	CZ	2014	0.552	1047.6	656.3	1929.7	976.6	1054.7	1500	1501	923.3	919.4	899.9	902.9	915.6	928.9	942	954.2	964.2	969.3	981.6	993.6	1001.6	1011	1038.7	1042.6	1019.5	1076	1011.2	6.35292e-05	1.33815e-06	6.2191e-05	46.4754	16.6722	-10
vraa	CZ	2014	0.592	956.5	546.9	1929.7	960.9	1078.1	1687.5	632.2	681	547.6	867.1	852.8	846.8	862.2	851.7	886.3	901	910.7	921.8	941.3	945	946.6	960	994.8	547	1488.3	720.2	4.01333e-05	1.72163e-06	3.84117e-05	22.3113	13.4852
vraa	CZ	2014	0.488	1060.7	562.5	1890.6	960.9	1054.7	1210.9	921.7	943.2	928.9	906	906.3	918.7	927.2	938.1	946.9	602.1	587.5	559.7	991.9	566	838.1	986.3	621.2	1054.6	1066.2	1076.4	4.03385e-05	3.25124e-06	3.70873e-05	11.4071	10.5718
vraa	CZ	2014	0.48	1039.4	585.9	1921.9	945.3	1015.6	1078.1	907.4	923.4	914.7	912	914.1	926.8	934.7	943.1	949	956.8	967	904.1	905.1	767.6	997.8	1002.9	602	807.7	1023.2	769.4	6.31377e-05	4.19706e-06	5.89406e-05	14.0433	11.4747
vraa	CZ	2014	0.536	1006.2	507.8	1921.9	898.4	1000	1492.2	861.9	892.4	880.6	872.1	882.1	894.3	912.3	929.7	938.9	652	600.8	645.5	628	983.4	700.2	614.9	636.3	625.1	603	1020	3.33495e-05	5.99812e-06	2.73514e-05	4.55999	6.58964
vraa	CZ	2014	0.472	1022.8	593.8	1882.8	945.3	1007.8	1070.3	908.5	924.2	925.9	912.4	919.5	934.7	564.1	956.2	967.7	976.6	986.1	993.9	1001.6	607.4	1013.4	1012.2	1019	1043.1	634.8	537.8	4.77879e-05	2.10133e-06	4.56866e-05	21.7417	13.3729
vraa	CZ	2014	0.448	1070.3	648.4	1929.7	960.9	1039.1	1164.1	917.9	941.9	942.7	924.2	931.3	940.7	949.2	956.7	604.3	1005.8	1004.7	1007.1	1009.5	1006.8	1013.1	1011	1034.9	1073.2	1062.7	577.9	3.32949e-05	2.37758e-06	3.09173e-05	13.0037	11.1407
vraa	CZ	2014	0.472	1046.3	890.6	1101.6	960.9	1023.4	1070.3	925.5	607.3	945	936.1	943.1	959.3	976.4	988.8	596.5	1021.1	1031.1	1045.1	1053.6	1050	1046.3	1036.3	1041.8	1029.8	1013.5	766.5	0.000105801	5.622e-06	0.000100179	17.8191	12.5088
vraa	CZ	2014	0.456	1055.6	906.3	1898.4	960.9	1031.3	1078.1	946.5	957.8	943.9	938	952.9	966.8	991.1	951.8	946.7	1041.4	1049	1051.3	1047.6	1058.7	1058.3	1049	1052	1049	996.5	990.5	7.93537e-05	3.21715e-06	7.61365e-05	23.6659	13.7412
vraa	CZ	2014	0.472	1033.7	625	1921.9	953.1	1023.4	1070.3	944.1	959.5	950.1	944.2	947.9	959.9	583.4	1001.1	1019.6	1025.7	1034	1040.4	1048.2	1043.8	1034.8	1035	1050.6	1012	988.5	1036.4	7.96938e-05	2.1839e-06	7.75099e-05	35.4916	15.5013
vraa	CZ	2014	0.448	1024.1	890.6	1101.6	976.6	1023.4	1070.3	954.5	974.4	986.9	986.6	984.4	987.3	639.8	1007.8	1021.2	1022.8	1032.7	1049.6	1052	1038.8	1026	1022.2	1016.6	1015.4	1000	990	0.000119152	2.42114e-06	0.000116731	48.2133	16.8317
vraa	CZ	2014	0.472	1065.2	921.9	1125	960.9	1023.4	1078.1	958.6	564.4	531.2	550.3	640.4	947.9	603.7	972	911.8	915.5	1003.8	1013.5	1011.4	1006.8	1016.5	1031.1	1063	1070.3	587	977.7	5.03148e-05	2.17026e-06	4.81446e-05	22.1838	13.4604
vysa	CZ	2014	0.688	1224.9	1000	1460.9	1109.4	1179.7	1234.4	1077.2	1120.9	1246.2	1232.8	1232.3	1223	1212.8	1208.9	1204.8	1198.2	1197.5	1191.5	1186.9	1169.5	1141.8	1107.6	1096.3	1072.9	1062.6	1048.6	0.00140561	2.67447e-07	0.00140534	5254.63	37.2054
vysa	CZ	2014	0.648	1173.5	1000	1273.4	1101.6	1171.9	1218.8	1071.1	1226.4	1230.2	1218.1	1206.2	1205.8	1204.3	1199	1198.1	1194.7	1187.1	1181.6	1177.8	1178.3	1156.9	1122.6	1073.6	1069.7	1050.7	507.9	0.00354969	2.91067e-07	0.0035494	12194.4	40.8616
vysa	CZ	2014	0.656	1231.4	1000	1281.3	1117.2	1179.7	1234.4	1047	1226.6	1241.9	1234.4	1219.8	1218.3	1217.5	1212.5	1208.5	1207.6	1208.8	1201.9	1200.6	1190.9	1174	1144.2	1099.9	1096.7	1079.9	544.7	0.00323946	9.88224e-08	0.00323936	32779.6	45.156
vysa	CZ	2014	0.64	1228.2	1007.8	1281.3	1125	1187.5	1234.4	1070.5	1129.3	1236.7	1225.6	1212.3	1204.8	1204.4	1201.8	1198.3	1196.5	1193.5	1188.4	1172.6	1162.9	1168.6	1156.6	1126.8	1110.1	1078.7	1200.9	0.00277623	7.15197e-07	0.00277551	3880.77	35.8892
vysa	CZ	2014	0.664	1227.3	1007.8	1273.4	1117.2	1195.3	1242.2	1047.1	1030.8	1235	1221.8	1212	1213.4	1212.4	1210	1208.3	1202.7	1198.1	1192.2	1208.9	1211.1	1199.1	1188.6	1160.9	1143.4	1091.7	1087.6	0.00333209	1.21144e-07	0.00333196	27504.3	44.394
vysa	CZ	2014	0.624	1226.1	1007.8	1273.4	1117.2	1179.7	1234.4	1047.1	1221.1	1231.4	1226.8	1220.9	1216.7	1213.7	1210.4	1210.1	1209.9	1200.5	1202	1211.4	1220.2	1193.5	1189.6	1151.5	1127.6	1107	1064.9	0.00287287	1.25918e-07	0.00287274	22814.5	43.5821	-20
vysa	CZ	2014	0.64	1232	1007.8	1304.7	1125	1195.3	1242.2	1082.4	1122.8	1244.2	1240.5	1225.7	1212.4	1209.7	1207.6	1202.4	1201.5	1196.9	1191.7	1183	1184.5	1173	1143.9	1114.2	1115.6	1097.2	1243.2	0.00310032	8.90451e-07	0.00309943	3480.74	35.4167	-10
vysa	CZ	2014	0.616	1180.7	1039.1	1546.9	1125	1187.5	1242.2	1254.3	1226.6	1195.3	1195.2	1193.4	1194.6	1192.5	1191.9	1188.2	1186	1183.7	1182	1176.9	1171.9	1154.1	1169.5	1157.3	1107.2	1079.8	1511.3	0.00200457	9.68024e-08	0.00200447	20706.8	43.1611	-20
vysa	CZ	2014	0.712	1226.3	992.2	1375	1101.6	1195.3	1250	1090.7	1112.2	1274.8	1250.5	1243.1	1240.3	1234.7	1227.7	1219.1	1213.5	1223.9	1221.1	1214.9	1193	1173.6	1143.2	1143.8	1081	1022.9	1023.8	0.00305991	3.91896e-05	0.00302072	77.0796	18.8694
vysa	CZ	2014	0.664	1224	992.2	1273.4	1101.6	1187.5	1234.4	1046.8	1226.9	1230.3	1216.4	1203.8	1202.4	1204.3	1207.8	1206.1	1199.2	1196.3	1188.9	1179.3	1193.9	1189.3	1170.6	1138.2	1071.9	1051.1	1067.7	0.00268355	7.64581e-08	0.00268347	35097.3	45.4527
vysa	CZ	2014	0.84	1068	984.4	1125	1031.3	1070.3	1093.8	771.8	1069.7	1073	1059.4	1058.6	1062.6	1066.8	1068.9	1073.4	1082.7	1086.9	1090.9	1087.2	1069.1	1060.1	1049.8	1021.5	1004.8	1018.3	1007.2	0.000462305	6.3774e-05	0.000398531	6.24911	7.95818
vysa	CZ	2014	0.736	1217.7	1007.8	1289.1	1093.8	1179.7	1226.6	792.2	1104.5	1234.3	1217.9	1206.7	1204.7	1200.4	1202.7	1201.2	1192.9	1188.5	1183.8	1178	1169.4	1159.7	1127.9	1117.9	1086.6	1045.8	1025.2	0.000685425	9.37536e-06	0.00067605	72.1093	18.5799
vysa	CZ	2014	0.688	1188.7	1015.6	1281.3	1132.8	1187.5	1226.6	1048.1	1069.5	1233.3	1222	1201	1202.5	1191	1193.8	1191.2	1200.3	1212.4	1211	1202.5	1192.8	1187.2	1173	1149.8	1113.6	1130.7	1167.1	0.000981813	0.000205614	0.000776199	3.77503	5.76921
vysa	CZ	2014	0.72	1294.1	984.4	1437.5	1179.7	1234.4	1296.9	1164.1	1214.1	1298.3	1275.6	1262	1258.1	1262.1	1266.9	1261.1	1264.7	1267.4	1257.3	1257.4	1253.8	1219.5	1204.7	1199.2	1178.7	1162.5	1410	0.000418576	2.5165e-06	0.00041606	165.333	22.1836
vysa	CZ	2014	0.672	1156.8	984.4	1265.6	1117.2	1171.9	1210.9	1003.4	1223.5	1223.8	1210.2	1199.2	1184.4	1180.9	1177.1	1184.6	1184.2	1178.3	1183.6	1170.4	1162.4	1150.7	1160.7	1142.8	1085.2	1064.8	1038	0.0012457	2.87243e-07	0.00124542	4335.76	36.3707
vysa	CZ	2014	0.68	1160	976.6	1281.3	1125	1171.9	1218.8	1148.4	1234.7	1242.6	1224	1220.6	1207.9	1198.6	1191.8	1193.6	1189.2	1183.3	1172.7	1173	1185.9	1161.3	1137.6	1095.9	1095.3	1084.1	1066	0.00103481	2.83752e-07	0.00103453	3645.88	35.618
vysa	CZ	2014	0.688	1188.2	960.9	1429.7	1109.4	1179.7	1226.6	1092.8	1233.6	1246.9	1236.7	1227.3	1226.8	1223.5	1224.7	1221.2	1218.5	1213.9	1215.2	1186.5	1180.5	1166.1	1168.9	1113.9	1079.6	1056	1398.6	0.000871152	2.13798e-07	0.000870938	4073.65	36.0998
vysa	CZ	2014	0.656	1166.7	992.2	1273.4	1125	1171.9	1218.8	1021.4	1225.3	1233.2	1225.4	1215.7	1217.2	1212	1207.7	1209	1208	1199	1186.5	1189.6	1196.3	1163.2	1152.6	1100.1	1093.8	1083.8	1029.2	0.000647742	5.14219e-07	0.000647228	1258.66	30.9991
vysa	CZ	2014	0.672	1295	1101.6	1375	1203.1	1273.4	1312.5	1148.4	1314.6	1341	1324.2	1311.3	1306.8	1305.1	1303.4	1298.2	1298.6	1295.4	1285.8	1285.9	1280.4	1259.8	1225.9	1222.6	1200.3	1188.1	1211.1	0.000681989	3.26086e-07	0.000681663	2090.44	33.2024
vysa	CZ	2014	0.76	1188.9	960.9	1257.8	1078.1	1148.4	1203.1	998.4	1086.6	1162	1149.8	1152.4	1160.5	1164.4	1161.3	1156.2	1154.1	1158.2	1152.8	1150.3	1120.8	1164.4	1093.2	1064.3	1049.1	1016	1013.3	0.000681241	5.64807e-05	0.00062476	11.0615	10.4381
vysa	CZ	2014	0.712	1288.3	968.8	1570.3	1179.7	1242.2	1304.7	989.3	1303.2	1311.3	1292.7	1288.3	1291.8	1285.4	1289	1287.1	1286.7	1282.3	1273.1	1270.2	1263.7	1230	1210.3	1193.6	1178.5	1193.6	1437	0.000534674	4.32451e-07	0.000534241	1235.38	30.918
vysa	CZ	2014	0.656	1159.7	976.6	1296.9	1109.4	1171.9	1226.6	628.9	1069.9	1251.5	1241.8	1228.4	1223.7	1223.3	1217.9	1213.6	1211	1211.7	1219.6	1203.4	1178.5	1154.2	1148.6	1122.1	1078	1021.5	1026.3	0.000694775	2.54426e-07	0.000694521	2729.75	34.3612
vysa	CZ	2014	0.656	1190.3	1046.9	1281.3	1117.2	1187.5	1226.6	1083.9	1070.4	1245.8	1228.2	1216.2	1213.1	1210.4	1208.1	1202.9	1199.3	1198.8	1190.4	1183	1187.1	1187.2	1159.2	1133.6	1073.6	1069.8	1056.4	0.000944733	2.45447e-07	0.000944487	3848.04	35.8524
vysa	CZ	2014	0.64	1210.8	1054.7	1281.3	1148.4	1203.1	1234.4	1086.7	1074.6	1241.7	1233.7	1229.1	1218.3	1214.5	1216.5	1212.2	1209.5	1197.4	1198.3	1201.4	1208.6	1245.1	1217.2	1201.1	1184.3	1163	1186.2	0.000714232	2.30313e-07	0.000714002	3100.14	34.9138
